# Supplementary material for: The emerging double-edged sword role of Sirtuins in the gastric inflammation-carcinoma sequence revealed by bulk and single-cell transcriptomes
Source: Front Oncol. 2022 Oct 17;12:1004726. doi: 10.3389/fonc.2022.1004726 (PMC9619065; doi:10.3389/fonc.2022.1004726)
Supplement: Supplementary file 2 [file Table_2.xlsx]

## Sheet: Sheet1
Sample	SG1	SG2	SG3	SG4	SG5	SG6	SG7	SG8	SG9	AG1	AG2	AG3	AG4	AG5	AG6	AG7	AG8	AG9	IM1	IM2	IM3	IM4	IM5	IM6	IM7	IM8	IM9	IM10	IM11	IM12	IM13	IM14	GC1	GC2	GC3	GC4	GC5	GC6	GC7	GC8	GC9	GC10	GC11	GC12	GC13	GC14	GC15	GC16	GC17
Pathology	SG	SG	SG	SG	SG	SG	SG	SG	SG	AG	AG	AG	AG	AG	AG	AG	AG	AG	IM	IM	IM	IM	IM	IM	IM	IM	IM	IM	IM	IM	IM	IM	GC	GC	GC	GC	GC	GC	GC	GC	GC	GC	GC	GC	GC	GC	GC	GC	GC
Non-atrophy	√	√		√		√	√	√				√				√																		√				√					√
Mild atrophy					√								√	√	√		√	√	√	√	√		√		√	√	√		√	√	√
Moderate atrophy										√																		√					√		√	√	√			√	√	√		√	√		√	√	√
Severe atrophy											√											√		√								√
Non-im	√	√	√	√	√	√	√	√	√	√		√		√	√	√	√	√
Mild im																				√	√		√		√	√	√		√	√	√								√
Moderate im																			√			√		√
Severe im											√																	√				√							√
Non-Chronic inflammation						√								√
Mild Chronic inflammation	√	√		√	√		√	√				√	√		√	√		√	√	√	√		√		√		√		√	√	√
Moderate Chronic inflammation										√	√						√							√		√						√
Severe Chronic inflammation																						√						√
Non-Active inflammation		√		√		√		√				√		√	√	√		√	√	√	√		√		√	√	√			√	√								√
Mild Active inflammation	√				√		√										√					√		√															√
Moderate Active inflammation											√																		√
Severe Active inflammation										√																		√				√
Age	Agedness	Midlife	Midlife	Agedness	Midlife	Midlife	no-record	Midlife	Midlife	Midlife	Midlife	no-record	Agedness	Midlife	Youth	no-record	Midlife	Midlife	Midlife	Midlife	Midlife	Youth	Agedness	Midlife	Midlife	Midlife	Agedness	Agedness	Agedness	no-record	Midlife	Agedness	no-record	no-record	no-record	Midlife	Agedness	no-record	no-record	no-record	Agedness	no-record	no-record	Midlife	no-record	Midlife	Midlife	Agedness	no-record
Gender	Female	Male	Male	Male	Female	Female	Female	Male	Male	Male	Male	Female	Male	Female	Female	Female	Female	Female	Male	Female	Male	Female	Male	Male	Male	Female	Female	Male	Male	Female	Male	Male	Male	Male	Male	Male	Male	Male	Female	Male	Female	Female	Male	Female	Male	Female	Male	Female	Male
Marriage	YES	YES	YES	YES	YES	YES	no-record	YES	YES	YES	YES	YES	YES	YES	NO	no-record	YES	YES	YES	no-record	YES	NO	no-record	no-record	YES	YES	YES	YES	YES	no-record	YES	YES	no-record	YES	no-record	no-record	no-record	no-record	no-record	no-record	no-record	no-record	no-record	YES	YES	no-record	no-record	no-record	no-record
Race	Han	Han	Han	Han	Han	Han	Han	Han	Han	Han	Han	Han	Han	Han	Han	Han	Han	Han	Han	Han	Han	Han	Han	Han	Han	Han	Han	Han	Han	Han	Han	Han	Han	Han	Han	Han	Han	Han	Han	Han	Han	Han	Han	Han	Han	Han	Han	Han	Han
BMI	22.0386	29.3878	26.2976	21.6263	23.7253	19.563	27.852	23.3564	26.2976	27.102	23.1405	22.5827	28.6851	22.8928	19.1001	23.1911	24.0055	24.6097	23.8754	19.2894	27.3438	25.3906	26.8136	29.3848	22.6757	23.8281	18.3655	18.3655	24.2215	16.6335	22.6757	22.4913	26.2976	25.7117	26.3465	25.6874	21.2585	25.5978	29.2969	21.7993	27.7671	24.9108	21.8851	26.4463	27.6817	27.0389	30.1162	22.6003	23.6652
Hypertension	YES	NO	NO	YES	NO	NO	NO	NO	NO	NO	NO	YES	YES	YES	NO	NO	NO	NO	NO	NO	NO	NO	NO	YES	NO	NO	YES	NO	NO	NO	NO	NO	NO	NO	NO	NO	NO	YES	NO	NO	NO	NO	YES	NO	NO	NO	NO	YES	NO
Diabetes	NO	NO	NO	NO	NO	NO	NO	NO	NO	NO	NO	NO	NO	NO	NO	NO	NO	NO	NO	NO	NO	NO	NO	NO	NO	NO	NO	NO	NO	NO	NO	NO	NO	NO	NO	NO	NO	NO	NO	NO	NO	YES	NO	NO	NO	NO	NO	NO	YES
Gastroscopy history	NO	YES	NO	NO	YES	NO	NO	YES	NO	NO	NO	YES	NO	NO	YES	NO	NO	YES	YES	NO	NO	NO	YES	NO	YES	YES	NO	YES	YES	NO	YES	NO	NO	YES	NO	NO	NO	NO	NO	NO	NO	NO	NO	NO	NO	NO	NO	NO	NO
HP infection history	NO	YES	NO	NO	NO	NO	NO	NO	NO	NO	NO	NO	NO	NO	NO	NO	NO	NO	NO	NO	NO	NO	YES	NO	NO	NO	NO	NO	NO	NO	NO	NO	NO	NO	NO	NO	NO	NO	NO	NO	NO	NO	NO	NO	NO	NO	NO	NO	NO
Colonoscopy history	NO	YES	NO	NO	NO	NO	NO	NO	NO	NO	NO	NO	NO	NO	NO	NO	NO	NO	YES	NO	NO	NO	NO	NO	NO	NO	NO	NO	NO	NO	NO	NO	NO	YES	NO	NO	NO	NO	NO	NO	NO	NO	NO	NO	NO	NO	NO	NO	NO
Family history	NO	YES	NO	NO	NO	NO	NO	NO	NO	NO	NO	NO	NO	NO	YES	NO	NO	NO	NO	NO	NO	NO	NO	NO	NO	NO	NO	YES	NO	NO	NO	NO	NO	NO	NO	NO	NO	NO	NO	NO	NO	NO	NO	NO	NO	NO	NO	NO	NO
Smoke	NO	NO	NO	NO	NO	NO	NO	NO	NO	YES	NO	NO	NO	NO	NO	NO	NO	NO	NO	NO	YES	NO	NO	NO	NO	NO	NO	NO	NO	YES	NO	NO	YES	NO	YES	NO	Quit	YES	NO	NO	NO	NO	NO	YES	NO	NO	NO	NO	NO
Alcohol	NO	Quit	NO	NO	NO	NO	NO	NO	NO	YES	NO	NO	NO	NO	NO	NO	NO	NO	NO	NO	YES	NO	NO	Quit	NO	NO	NO	NO	NO	NO	NO	NO	NO	YES	NO	NO	Quit	Quit	NO	NO	NO	NO	NO	NO	NO	NO	NO	NO	NO
Tea	NO	YES	NO	NO	NO	NO	NO	NO	NO	YES	NO	NO	YES	NO	YES	NO	YES	NO	YES	NO	YES	YES	NO	YES	NO	NO	YES	YES	YES	NO	NO	NO	NO	NO	NO	NO	YES	YES	NO	NO	NO	NO	NO	YES	YES	YES	YES	YES	NO
Allergies	NO	YES	NO	NO	NO	NO	NO	NO	NO	NO	YES	NO	YES	NO	NO	NO	NO	NO	NO	NO	YES	NO	NO	NO	NO	NO	NO	NO	NO	NO	NO	NO	NO	NO	NO	NO	NO	YES	NO	NO	NO	NO	NO	NO	NO	NO	NO	NO	NO
[truncated: 1 more columns]
