# Supplementary material for: The emerging double-edged sword role of Sirtuins in the gastric inflammation-carcinoma sequence revealed by bulk and single-cell transcriptomes
Source: Front Oncol. 2022 Oct 17;12:1004726. doi: 10.3389/fonc.2022.1004726 (PMC9619065; doi:10.3389/fonc.2022.1004726)
Supplement: Supplementary file 3 [file Table_3.xlsx]

## Sheet: Supplementary Table 4
	GC8	AG5	AG6	IM4	AG7	IM5	SG4	IM6	IM7	GC9	GC10	SG1	GC11	IM8	SG5	IM9	GC12	IM10	SG2	GC13	AG8	SG6	SG7	SG3	SG8	IM11	IM12	IM13	AG9	GC14	GC2	SG9	GC15	IM14	GC16	GC17	GC18	IM1	AG1	IM2	IM3	GC3	GC4	GC5	AG2	GC1	AG3	GC6	GC7
TRNP	14438	22494	4286	4250	1268	35712	4856	8324	6275	6295	21818	676	11735	2964	21534	15190	18689	5928	2139	18624	6066	16231	10881	4029	32354	11048	6481	10346	10970	5726	1572	21811	17267	1441	2977	15593	8386	2058	1645	3895	2249	3723	586	9807	32267	3341	20444	29642	1623
TRNT	0	2	2	0	0	2	0	0	0	0	5	0	0	0	0	0	8	0	0	0	0	0	2	0	0	0	0	2	2	2	0	4	0	0	0	0	0	0	0	0	4	0	0	0	1	0	0	0	0
CYTB	1063165	1383323	1344398	456360	207151	1863022	367705	801632	585410	425964	1706007	200706	953331	238638	2062555	1141897	1453875	642228	615163	1608724	433286	808605	1304556	1357072	1094820	251021	580994	1367598	990229	581951	556002	1547137	1198660	115873	256113	781885	842332	1051878	474509	1055816	938825	1281880	359845	2094253	1829441	1313926	1028344	1844254	99475
TRNE	10	10	1	2	0	88	0	4	12	32	24	0	8	6	20	41	102	72	0	28	63	13	10	5	33	18	19	25	9	48	7	24	69	0	11	6	81	5	1	5	8	10	2	13	41	10	3	50	0
ND6	685160	4712528	516290	258092	107028	1296001	302595	525180	429649	248765	914754	75441	843060	125237	1416769	528221	587995	384599	182339	991163	265484	659987	590311	392234	940780	247490	304230	536463	595617	235066	205308	700438	539294	33397	100466	524774	617495	287433	147582	308352	231369	396021	80960	580551	1405819	372195	538372	1053975	48878
ND5	1435181	1886308	2014798	576022	231718	2911046	572180	1115357	837189	604173	1769457	311478	1510155	319547	2658899	1337392	1727595	984315	876156	1901755	611864	1405533	1193794	1987683	1687651	302917	841283	1484839	1092974	737089	965708	1391312	1388985	89239	259084	971764	1360443	1294577	675297	1386456	1295407	2109945	461411	2509693	2943763	1613129	1321602	2517262	133300
TRNL2	0	0	0	0	0	0	0	0	0	0	0	0	0	0	0	1	0	1	0	0	0	0	1	0	4	0	2	0	0	0	0	1	0	0	0	2	0	0	0	0	0	1	0	0	0	0	0	0	0
TRNS2	0	0	0	0	0	0	0	0	0	0	4	0	0	0	0	0	16	12	0	0	38	4	2	0	4	4	3	2	0	4	0	2	8	0	0	0	6	2	0	0	0	0	0	2	0	0	0	2	0
TRNH	0	0	0	2	0	4	2	0	2	0	2	0	0	2	0	2	21	13	0	2	52	4	6	0	8	12	4	4	3	4	0	4	22	0	8	2	16	0	0	2	0	0	0	0	4	2	0	1	0
ND4	2944140	4300150	3189041	1248759	411271	4693217	1655342	2533377	1227815	951315	3807310	427535	2780428	637230	5397867	2478700	4507553	1586486	1144292	4643129	992691	2302152	3029467	2745606	3975266	1096208	1399024	2212065	2642817	1190554	1263191	3784796	3168126	233954	495006	2186037	2382725	2232582	891870	2155751	2009687	2519964	711194	4726110	4887384	2696583	3371215	4571994	325662
ND4L	205263	228787	132935	64778	24408	275619	68685	130554	114635	107439	317573	14779	125328	49973	320207	252789	482667	96172	47322	203002	78542	199862	170150	92645	314269	64523	107673	187254	133573	131231	46198	205670	212212	10524	30133	105012	153308	87034	25168	59305	67072	89196	21658	229673	246119	142617	181809	280043	14233
TRNR	1	0	0	0	0	0	0	0	1	0	0	0	2	0	0	2	0	0	0	0	0	0	0	0	0	0	0	0	0	0	0	0	0	2	0	0	0	0	0	0	0	0	0	0	0	0	0	0	0
ND3	150608	197084	234479	65372	21522	360370	57136	106353	72652	40611	314765	48033	190263	58164	423383	185555	545891	102304	103310	252499	60758	114057	184402	214302	204160	28043	77643	102876	101483	56857	82988	165233	127836	11108	31364	100356	126988	179237	82211	214815	103815	324380	48319	453860	419035	230811	182096	302208	28315
TRNG	0	0	0	0	0	0	0	0	0	0	0	0	0	0	0	2	0	0	2	0	0	0	0	0	0	0	0	0	0	0	0	0	0	0	0	0	0	0	0	0	12	0	0	0	0	0	0	0	0
COX3	2132309	2027205	2249592	793359	294690	3492733	838546	1938837	1148823	725348	4214579	272383	2677538	475928	3605990	2113240	3514470	1263609	725265	3885700	540936	2032110	2302924	2015626	3024983	574319	1116745	2028759	2210031	880284	848761	3085211	2903051	140206	416208	2234505	2091729	1612879	624283	1516349	1781753	1866222	473281	2674420	2705570	1852575	2099548	3178383	183169
ATP6	605187	743368	1056215	232243	89768	1403399	273126	342984	344478	257892	754827	130191	431629	177398	904214	724132	1820054	462463	401915	954019	266599	476347	699390	945695	597922	127901	408029	595030	352477	300826	436600	521765	691637	30426	121332	360657	624817	892061	288984	654874	634486	777966	196785	1236294	1539903	1016310	545032	1268218	57562
ATP8	13317	13220	77661	6521	4846	49454	5872	9783	15037	18099	25385	4826	16771	6141	16265	12839	134132	26321	13409	22867	19728	24843	24948	39750	31055	17888	19795	20897	6148	14266	29869	11383	21287	1847	7634	10074	28593	36620	21489	28694	45955	28281	12020	104503	66080	45537	9714	41599	1568
TRNK	0	0	4	38	0	2	0	1	3	0	1	0	4	1	132	1	215	0	6	0	4	0	7	0	0	5	94	3	0	0	0	1	0	0	1	1	2	0	0	8	0	1	0	0	4	0	0	1	0
COX2	891680	1282116	1562467	329872	111615	2149652	402978	657861	587579	500295	1680246	187315	1028343	307977	1617420	772188	2234739	611284	416026	1421436	235586	639431	752888	1242619	1178585	246642	515480	929084	763977	474616	537446	729062	915140	59134	162250	852527	867611	1102758	374237	773494	1020838	1310731	315639	1495483	1731581	1244794	712524	1717967	150831
TRND	0	0	0	0	0	8	0	0	0	0	0	0	0	0	0	0	0	0	0	0	0	0	0	0	0	0	0	0	0	1	2	0	0	0	0	0	2	0	0	0	0	0	0	0	0	0	0	0	0
TRNS1	1	0	4	0	1	2	0	0	0	0	0	0	0	0	1	0	0	1	0	1	9	1	0	1	0	0	0	0	0	0	2	0	0	0	0	0	0	1	1	2	2	2	0	1	0	3	0	2	0
COX1	8837734	14043442	6431476	3860752	1476447	11438160	5214837	12203458	5139101	2386108	18531469	687804	16382776	1875104	13232195	6923386	6399207	4053469	2110220	15123905	2930637	6788387	11501612	6046948	15756470	2359720	4305614	9311621	18272115	4702386	2468224	18810242	10557052	1170206	1859245	12150512	14451818	4751511	2055598	3883143	5047565	5850611	1279692	7177987	9056121	5137575	10756845	12212523	857508
TRNY	163	171	199	61	6	1004	93	118	153	316	734	11	290	103	348	87	3193	522	21	1049	373	1027	319	138	991	409	367	174	107	159	39	247	456	40	122	230	804	80	25	89	151	112	18	246	658	64	120	508	22
TRNC	60	127	289	15	42	377	37	50	56	72	226	1	81	27	145	81	1103	116	17	153	279	254	142	26	324	114	67	75	68	76	124	102	133	20	26	64	164	50	38	133	216	82	13	197	157	3	63	277	5
TRNN	6	10	14	3	0	7	3	4	1	3	6	0	2	4	5	3	16	2	1	6	2	15	4	1	11	0	1	1	1	2	6	5	6	1	1	6	4	5	4	6	19	16	1	12	8	2	4	8	0
TRNA	1	2	2	0	0	0	0	0	0	0	0	1	0	0	0	0	1	0	0	0	2	0	2	2	0	0	0	0	0	0	3	0	2	0	0	0	2	0	1	2	0	2	0	2	0	0	0	2	0
TRNW	0	0	0	0	0	0	0	0	0	1	2	0	0	0	0	2	0	0	0	0	0	0	2	0	1	2	0	2	0	0	0	0	0	2	2	0	0	0	0	0	0	0	0	0	1	0	0	2	0
ND2	689698	859948	732580	221320	103930	1078092	219958	488576	305179	330440	697674	126384	600364	133664	771448	455950	1356550	414743	402384	972057	242252	400321	666419	720873	625685	167287	395109	485329	490602	269863	299838	512535	596500	34496	191106	277365	417219	743392	254053	605830	471890	733530	270223	1247364	1112381	864127	669865	1042747	58783
TRNM	0	6	2	2	0	10	4	6	6	16	20	0	8	4	2	12	56	59	0	10	54	8	22	0	40	26	16	0	8	10	0	24	26	0	8	4	64	2	0	0	2	2	0	2	5	4	0	6	0
TRNQ	1	0	0	0	0	4	0	0	0	3	3	0	0	1	0	4	0	0	0	0	0	0	0	0	0	1	0	0	0	0	0	0	0	0	0	0	0	0	0	0	0	0	0	0	0	0	0	0	0
TRNI	0	0	0	0	0	6	1	0	0	0	1	0	2	0	1	0	6	4	0	5	6	0	2	0	4	0	4	2	2	4	0	2	3	0	0	4	3	0	0	0	0	0	0	0	4	0	0	2	0
ND1	1179392	1098870	1192307	343582	150011	1465727	393815	764278	503785	438002	1553803	143151	1075368	273582	1379292	933512	2007714	529936	495854	1391295	360250	720283	1174447	965182	1157395	357553	664374	782848	663901	405421	459555	1184844	1119482	67880	228937	780382	802052	783149	393195	633114	742196	1009186	252292	1765324	1941951	1077294	1141396	1440925	97602
TRNL1	14	6	7	0	0	19	0	1	1	0	8	0	2	3	2	5	39	12	0	0	14	0	7	1	4	1	12	8	2	2	0	8	21	0	3	4	8	2	0	2	10	4	0	4	1	11	1	13	0
RNR2	11113	8065	1586	3543	334	9183	3074	9425	2794	1143	4858	170	2721	668	3961	18762	3520	6665	439	84169	343959	1548	1881	2558	4768	31901	1047	7167	4494	1566	1264	3735	6256	8675	2141	13288	6149	1439	884	2849	1755	2871	240	334	3736	1118	1682	7970	1100
TRNV	0	2	0	1	0	4	0	0	0	0	2	0	0	0	0	0	20	14	0	2	6	6	0	0	10	0	4	4	0	0	0	0	8	0	6	4	6	0	0	3	0	0	0	0	4	2	0	2	0
RNR1	1845	1882	918	621	149	3602	502	2826	1578	470	1994	19	1377	104	1461	11624	2069	5138	338	58468	110105	686	873	512	1927	13666	177	3323	1791	754	315	1493	2119	3330	967	4222	2678	186	76	447	320	297	46	92	1957	273	417	2368	305
TRNF	14	5	47	8	10	40	4	4	14	17	183	5	7	7	10	21	651	35	7	38	86	40	14	199	74	30	47	12	14	80	37	37	19	6	21	10	71	24	18	20	21	45	8	137	29	456	11	38	2
LILRP2	3	0	0	6	0	0	6	0	0	6	0	0	0	0	0	0	0	0	0	0	2	0	0	0	0	2	6	0	0	0	1	0	4	2	0	0	4	0	0	0	0	4	0	0	0	0	0	2	0
KIR3DL3	4	0	0	4	0	0	2	0	0	2	0	0	2	0	0	0	0	0	0	8	0	0	0	0	0	14	0	0	0	0	0	0	0	0	0	0	0	0	0	0	0	0	0	0	0	0	0	0	0
KIR2DS2	0	0	0	0	0	0	0	0	0	0	0	0	0	0	0	0	0	0	0	0	0	0	0	0	0	0	0	0	0	0	0	0	0	0	0	0	0	0	0	0	0	0	0	0	0	0	0	0	0
KIR2DL2	0	0	0	0	0	0	0	0	0	0	0	0	0	0	0	0	0	0	0	0	0	0	0	0	0	0	0	0	0	0	0	0	0	0	0	0	0	0	0	0	0	0	0	0	0	0	0	0	0
KIR2DL4	7	0	4	4	0	4	0	2	0	22	0	0	0	0	0	6	4	2	2	8	6	0	0	2	0	0	15	4	0	2	0	0	4	0	2	3	0	0	0	0	0	2	0	0	0	0	6	0	2
KIR3DS1	0	0	0	0	0	0	0	0	0	0	0	0	0	0	0	0	0	0	0	0	0	0	0	0	0	0	0	0	0	0	0	0	0	0	0	0	0	0	0	0	0	0	0	0	0	0	0	0	0
KIR2DL5A	0	0	0	0	0	0	0	0	0	0	0	0	0	0	0	0	0	0	0	0	0	0	0	0	0	0	0	0	0	0	0	0	0	0	0	0	0	0	0	0	0	0	0	0	0	0	0	0	0
KIR2DS5	0	0	0	0	0	0	0	0	0	0	0	0	0	0	0	0	0	0	0	0	0	0	0	0	0	0	0	0	0	0	0	0	0	0	0	0	0	0	0	0	0	0	0	0	0	0	0	0	0
KIR2DS1	0	0	0	0	0	0	0	0	0	0	0	0	0	0	0	0	0	0	0	0	0	0	0	0	0	0	0	0	0	0	0	0	0	0	0	0	0	0	0	0	0	0	0	0	0	0	0	0	0
KIR3DL2	0	0	4	4	0	0	1	1	0	4	0	0	0	0	0	0	0	2	0	0	4	0	0	0	8	6	0	0	0	5	0	0	0	6	4	0	0	0	2	0	0	0	0	0	9	0	0	0	0
KIR2DL3	0	0	0	4	0	0	0	2	0	2	4	0	0	0	0	0	0	0	0	0	0	8	0	0	0	0	0	2	0	0	0	0	1	0	0	0	0	2	0	0	0	0	0	0	0	0	0	0	0
KIR2DP1	0	2	6	0	0	0	6	2	0	0	10	0	0	0	8	0	4	1	0	22	35	9	17	0	10	37	0	2	16	0	0	6	0	10	0	15	6	0	0	0	0	0	0	0	2	0	0	0	0
LOC101928804	0	0	0	0	0	0	0	0	0	0	0	0	0	0	0	0	0	0	0	0	2	0	0	0	0	0	0	0	0	1	0	0	0	0	0	0	2	0	0	0	0	0	0	0	0	0	0	0	0
KIR2DL1	0	0	1	0	0	0	2	2	0	0	2	0	0	2	8	0	0	1	0	8	5	1	0	0	2	6	2	0	0	2	0	2	0	0	4	0	2	0	0	0	0	2	0	0	0	0	6	0	0
KIR3DP1	0	0	2	0	0	0	0	0	0	0	0	0	2	0	2	10	0	0	0	7	18	6	5	2	0	6	0	0	0	0	0	0	4	0	0	0	4	0	0	0	0	0	0	0	0	0	0	0	0
KIR3DL1	0	0	0	0	0	0	0	0	0	0	1	0	0	0	4	0	0	0	2	0	3	3	0	0	0	4	0	0	0	0	0	0	0	2	0	0	0	0	0	0	0	0	0	0	0	0	2	0	0
KIR2DS4	0	0	0	0	6	0	0	0	2	0	0	0	0	2	0	3	2	0	0	0	3	4	0	0	0	0	0	0	13	0	0	4	0	0	2	0	0	0	0	0	0	0	0	0	0	0	6	0	0
KIR2DL5B	0	0	0	0	0	0	0	0	0	0	0	0	0	0	0	0	0	0	0	0	0	0	0	0	0	0	0	0	0	0	0	0	0	0	0	0	0	0	0	0	0	0	0	0	0	0	0	0	0
RNU6-222P	0	0	0	0	0	0	0	0	0	0	0	0	0	0	0	0	0	0	0	0	0	0	0	0	0	0	0	0	0	0	0	0	0	0	0	2	0	0	0	0	0	0	0	0	0	0	0	0	0
NCR1	8	0	0	0	0	0	5	3	0	8	0	0	2	0	2	0	0	2	0	0	8	1	12	0	0	0	8	7	0	5	2	0	10	4	4	0	0	0	2	0	0	0	0	0	0	0	0	0	0
FCAR	0	0	6	0	0	0	3	0	0	2	0	0	4	0	4	2	16	3	0	4	2	1	2	0	0	4	2	1	0	0	0	0	4	0	2	14	6	0	0	0	0	0	0	0	0	0	3	0	4
LOC102725023	0	0	0	0	0	0	0	0	0	0	0	0	0	0	0	0	0	0	0	0	0	0	0	0	0	0	0	0	0	0	0	0	0	0	0	0	0	0	0	0	0	0	0	0	0	0	0	0	0
KIR2DS3	0	0	0	0	0	0	0	0	0	0	0	0	0	0	0	0	0	0	0	0	0	0	0	0	0	0	0	0	0	0	0	0	0	0	0	0	0	0	0	0	0	0	0	0	0	0	0	0	0
EPS8L1	359	130	120	104	107	589	77	934	5405	2582	764	18	473	176	304	267	509	2728	43	219	117	974	304	197	496	271	15898	9095	728	7184	167	282	465	114	1036	464	391	684	181	219	93	295	74	34	239	3248	188	489	99
RDH13	188	82	69	56	20	264	75	323	1500	1624	162	9	149	155	91	37	162	789	55	96	219	485	213	130	189	88	4991	2744	107	2675	35	114	132	30	1194	73	89	253	30	72	40	75	25	26	82	1074	90	229	20
GP6	6	2	12	0	6	18	2	4	43	122	5	0	6	2	2	2	4	6	0	5	12	39	11	5	6	16	284	27	0	183	0	0	0	6	197	14	0	4	0	0	0	0	0	0	15	39	2	4	0
GP6-AS1	17	5	10	0	3	19	0	15	67	96	5	2	2	14	2	2	15	29	1	10	38	34	16	6	18	31	317	145	0	120	2	0	3	4	113	5	1	4	6	0	1	7	4	0	4	77	6	26	0
RPL36AP50	0	0	0	6	0	0	0	0	4	2	4	0	0	0	0	0	0	0	0	6	0	0	0	0	0	0	2	9	0	7	0	0	0	0	6	0	1	0	0	0	0	0	0	0	0	2	0	0	0
NLRP2	25	32	43	65	14	32	12	33	359	168	82	4	4	10	69	30	17	0	2	16	63	50	32	36	5	18	838	695	31	486	54	102	4	22	310	140	8	6	26	28	16	28	0	30	78	749	30	102	27
NLRP7	0	6	12	7	2	2	5	10	6	18	2	0	19	2	6	18	0	8	1	9	55	10	9	18	4	2	2	11	12	14	32	18	0	2	2	8	4	16	17	7	1	2	0	2	35	0	4	2	8
LILRP1	1	0	0	0	0	6	0	2	2	2	0	0	0	0	0	0	0	0	0	4	2	0	0	0	0	10	0	4	0	0	0	0	0	0	0	8	0	0	0	0	0	0	0	0	0	0	6	0	2
LOC102724290	0	0	0	0	0	0	0	0	2	0	0	0	0	0	0	0	0	0	0	0	2	0	0	0	0	0	0	0	0	0	0	0	0	0	0	0	0	0	0	0	0	0	0	0	0	0	0	0	0
LILRB4	61	8	59	69	19	32	2	22	17	72	19	2	77	21	54	95	49	82	10	126	39	40	102	52	25	12	22	36	66	38	158	132	91	61	16	95	105	10	131	13	16	27	29	20	57	2	24	58	40
VN1R105P	0	6	2	6	0	0	0	4	4	2	4	0	10	0	0	2	2	10	0	14	4	2	8	8	2	12	0	4	2	0	0	0	2	6	0	16	5	0	0	2	0	2	0	0	9	0	2	8	0
MIR8061	0	0	0	0	0	0	0	0	0	0	2	0	0	0	0	0	0	0	0	0	0	0	3	0	0	4	0	0	0	0	0	0	0	10	0	3	2	0	0	0	0	1	0	0	0	0	0	0	0
LILRB1	62	8	113	79	47	60	14	46	30	155	21	2	49	34	63	80	31	88	30	66	456	236	63	62	34	36	28	31	77	45	152	114	103	67	53	73	94	20	85	15	43	36	31	31	99	7	39	7	56
LILRA1	12	0	8	34	4	2	0	19	8	8	2	0	10	0	44	8	8	24	1	27	18	16	27	14	14	2	12	2	36	5	13	13	23	36	12	13	32	4	6	0	0	2	10	0	8	6	11	4	1
LILRA2	3	4	8	0	4	2	0	6	0	4	3	2	9	0	8	10	8	10	10	18	6	7	8	0	2	8	7	6	20	2	0	9	8	14	0	10	21	0	4	6	2	2	2	0	2	0	14	12	0
LOC105372461	0	0	0	0	0	0	0	2	0	0	0	0	0	0	0	0	2	0	0	0	0	2	0	0	0	0	0	0	0	0	0	0	0	2	0	0	0	0	0	0	0	0	0	0	0	0	0	0	0
LOC107985347	0	0	0	1	0	0	0	1	0	0	0	0	4	0	0	4	0	0	0	0	0	0	0	0	4	0	0	0	4	0	0	3	0	8	0	0	0	0	0	0	0	0	2	0	2	0	0	0	0
KIR3DX1	4	0	0	0	0	0	11	0	0	6	3	0	4	2	0	0	1	0	0	10	39	11	2	2	12	12	0	0	0	2	1	4	2	0	2	0	1	0	0	0	4	0	0	2	2	0	0	0	2
LOC105372460	4	0	0	0	0	0	4	0	0	0	2	0	0	0	0	0	0	1	0	0	0	2	0	0	0	4	0	2	0	0	0	0	0	0	2	0	2	0	0	0	0	0	0	0	0	2	0	0	0
LAIR2	0	0	0	4	0	0	0	0	2	0	0	0	11	6	0	4	4	2	0	0	5	0	0	0	0	0	2	0	4	0	6	0	9	0	14	0	2	0	0	0	0	0	2	0	2	6	0	2	0
CDC42EP5	141	109	253	64	24	481	43	259	735	751	913	2	299	185	189	178	365	1305	15	276	146	220	225	381	154	165	4131	1539	207	1030	110	259	593	32	1537	807	503	263	49	80	144	147	144	61	159	797	149	467	30
LENG9	24	44	34	16	6	85	22	80	138	223	216	0	61	33	79	42	34	197	2	63	91	392	181	43	270	66	547	208	53	170	24	108	62	9	220	79	51	63	13	58	11	30	20	23	30	207	44	85	12
LENG8	1099	165	354	131	231	2544	395	2077	7982	11722	722	28	715	847	300	137	1426	5549	1004	492	5855	15001	5140	1516	2069	1216	27771	13261	171	13477	134	316	742	141	8405	156	524	1216	72	135	66	266	18	95	923	7456	304	1861	41
LENG8-AS1	10	0	10	8	3	54	10	16	90	114	7	0	8	10	0	0	0	40	10	0	61	87	66	6	32	43	242	190	0	135	0	0	26	0	220	7	2	16	0	2	0	5	0	2	3	74	8	45	0
TTYH1	2	2	10	2	0	9	0	3	82	77	9	0	0	6	8	0	10	39	11	0	49	120	43	10	12	0	167	135	0	37	0	0	47	9	190	2	4	8	0	2	0	5	0	8	8	50	0	10	0
LAIR1	103	40	241	168	27	64	36	100	34	216	77	0	222	33	224	136	91	160	62	252	149	187	357	114	94	96	92	69	166	95	201	216	341	181	116	211	282	39	76	26	35	74	94	48	188	12	70	67	98
LILRA4	2	1	6	4	2	14	2	2	0	0	0	0	4	0	6	6	6	4	2	13	2	2	2	4	12	0	0	0	0	0	7	7	23	9	5	14	0	0	0	2	0	4	4	0	8	0	0	0	0
VN1R104P	0	0	0	0	0	0	0	0	0	0	0	0	0	0	0	2	0	0	0	2	0	0	0	0	0	0	0	0	0	0	0	0	0	0	0	0	0	0	0	0	0	0	0	0	0	0	0	0	0
LILRA5	2	0	7	2	2	10	0	0	0	10	2	0	8	2	9	17	8	12	0	19	2	4	6	12	10	23	6	5	0	0	16	0	14	0	0	9	29	0	4	2	2	5	4	0	4	2	4	4	0
LILRA3	0	0	0	0	0	0	0	0	0	0	0	0	0	0	0	0	0	0	0	0	0	0	0	0	0	0	0	0	0	0	0	0	0	0	0	0	0	0	0	0	0	0	0	0	0	0	0	0	0
MIR4752	0	0	0	0	0	0	0	0	0	0	0	0	0	0	0	0	0	0	0	0	2	0	0	0	0	0	0	0	0	0	0	0	0	0	0	0	0	0	0	0	0	0	0	0	0	0	0	0	0
LILRB2	19	4	44	45	14	24	20	36	22	124	13	0	14	14	77	55	10	59	20	33	44	81	57	24	62	33	43	19	51	32	88	12	71	149	36	63	75	8	55	8	0	15	31	15	44	4	33	24	28
LOC100420187	0	0	0	0	0	0	0	0	0	0	2	0	0	0	0	0	1	0	0	0	2	0	0	0	4	0	0	0	0	0	0	0	0	2	0	0	0	0	0	0	0	0	0	4	0	0	0	0	0
LILRB5	35	32	173	54	22	78	60	69	75	231	36	2	90	7	121	96	17	95	30	164	66	158	113	93	117	31	114	149	189	94	46	118	203	71	64	97	77	54	46	31	81	37	69	52	46	13	45	71	37
LOC107987463	0	0	0	0	0	0	0	0	0	0	0	0	0	0	0	0	0	0	0	0	0	0	0	0	0	0	0	0	0	0	0	0	0	0	0	0	0	0	0	0	0	0	0	0	0	0	0	0	0
LILRA6	18	0	12	4	6	2	6	10	3	18	8	0	0	4	0	12	4	7	2	10	2	13	7	9	1	2	3	38	12	5	15	28	3	48	18	22	16	4	4	2	2	11	8	0	3	2	5	8	2
LOC100421130	0	0	8	0	1	0	0	1	0	3	0	0	2	0	0	0	2	1	0	8	3	0	5	1	0	2	2	1	0	0	0	3	2	0	0	0	2	0	0	0	0	0	0	1	4	1	0	0	0
LOC107987462	0	0	0	0	0	0	0	0	0	0	0	0	0	0	0	0	0	0	0	0	0	0	0	0	0	0	0	0	0	0	0	0	0	0	0	0	0	0	0	0	0	0	0	0	0	0	0	0	0
RPS9	1326	1247	2959	918	451	1409	601	1919	2033	1950	2472	120	1925	417	1696	1905	1689	2129	966	2794	4193	2987	3416	2755	1861	1747	3089	3661	1859	1187	1408	2290	2572	906	2170	1790	1828	995	827	989	1018	1351	429	886	812	3737	1526	1440	270
TSEN34	65	24	140	36	8	86	18	81	111	184	105	2	90	33	78	48	91	78	42	85	176	228	201	77	75	68	203	177	58	145	58	112	71	22	198	102	103	58	28	60	50	57	12	24	52	169	88	64	4
MBOAT7	240	52	47	53	11	320	42	218	645	1014	133	8	72	111	97	28	176	1053	27	103	208	412	322	207	208	79	2693	987	95	1037	52	67	147	65	959	78	122	98	7	9	19	22	24	20	71	662	63	211	35
TMC4	121	89	90	56	25	813	36	473	1322	2555	207	17	101	171	150	46	118	1278	51	199	231	451	376	303	151	102	5330	2146	252	2762	28	90	166	24	1417	164	84	370	25	42	14	38	36	38	75	1692	97	486	36
LENG1	41	6	38	2	7	45	34	40	54	118	36	4	48	18	40	12	20	78	30	35	102	79	65	49	61	6	170	145	23	65	15	18	31	2	108	45	22	43	8	20	17	26	0	29	36	115	16	48	6
LOC102724273	10	0	0	0	0	28	2	5	30	74	2	0	6	4	6	0	4	15	2	0	32	49	34	4	13	7	88	62	15	95	0	10	0	0	42	1	2	3	0	0	2	2	0	0	22	78	4	19	0
CNOT3	421	127	175	179	109	510	165	327	925	1255	251	10	398	122	270	171	248	633	140	260	721	1279	701	205	644	209	2242	1506	276	1248	94	288	300	118	1048	283	226	298	47	78	87	103	25	78	348	671	215	365	46
PRPF31	258	68	181	118	66	178	89	208	487	565	250	16	219	32	223	129	250	332	116	216	566	749	398	239	288	145	830	882	140	333	126	211	236	131	555	145	162	89	56	85	71	106	40	85	147	522	144	191	24
TFPT	50	14	50	26	16	55	26	49	113	168	46	8	26	20	50	34	30	93	22	159	78	147	136	67	38	37	253	165	63	98	32	47	80	25	145	44	54	31	25	20	15	35	10	27	25	188	32	63	8
NDUFA3	165	88	234	162	32	256	55	176	247	356	165	16	171	62	277	144	151	323	91	259	208	247	323	198	172	20	691	571	173	243	104	169	222	139	428	239	171	73	58	63	77	105	20	70	181	252	193	201	30
OSCAR	2	0	10	4	0	16	7	0	10	16	2	0	2	0	20	4	4	20	0	2	2	17	19	7	12	6	7	4	6	0	18	6	21	21	19	12	30	6	8	4	2	6	6	6	8	0	10	6	0
TARM1	2	0	0	4	0	0	0	0	0	0	0	0	10	0	0	0	0	0	0	0	12	0	0	0	2	0	0	0	0	0	0	0	0	2	0	0	4	0	0	0	0	0	0	0	0	0	0	0	0
VSTM1	0	0	0	4	0	0	0	1	0	0	2	0	8	4	0	2	0	0	0	5	0	4	0	0	4	0	0	2	0	0	0	4	0	2	0	2	6	1	2	0	0	0	0	0	0	0	7	3	0
LOC107987461	0	0	0	0	0	0	0	0	0	0	0	0	0	0	0	0	0	0	0	0	0	0	0	0	0	0	0	0	0	0	0	0	0	0	0	0	0	0	0	0	0	0	0	0	0	0	0	0	0
HCG23	2	0	4	2	0	0	0	6	3	6	0	0	4	2	8	0	2	2	0	22	13	6	2	10	18	1	6	6	1	2	4	2	1	0	10	0	0	2	2	1	0	8	0	8	0	0	4	0	0
BTNL2	0	0	0	0	0	4	0	8	2	2	0	0	0	0	12	0	0	0	0	7	13	16	0	16	6	7	2	0	2	0	0	0	0	0	0	13	0	0	0	1	0	2	0	0	2	1	1	0	0
TSBP1-AS1	15	13	0	2	2	20	21	12	2	18	2	0	0	0	2	2	0	0	0	11	19	34	9	3	6	12	5	8	0	8	0	0	6	1	12	0	2	0	0	2	6	3	0	1	0	0	4	8	2
HLA-DRA	2381	1112	4855	5242	923	2263	585	3160	1168	4460	1433	107	3787	1261	3890	5430	2228	6107	1419	7024	3292	2430	5737	3413	2209	1447	2044	1882	4592	3498	6442	5498	9168	4433	6372	5834	3198	1338	3353	1362	1250	2776	2395	2255	4358	503	1769	1812	2325
LOC102725035	0	0	0	0	0	0	0	0	0	0	0	0	0	0	0	0	0	0	0	0	0	0	0	0	0	0	0	0	0	0	0	0	0	0	0	0	0	0	0	0	0	0	0	0	0	0	0	0	0
LOC112268246	0	0	0	0	0	4	0	6	14	16	0	0	0	0	0	0	0	8	0	0	4	6	3	5	0	0	18	18	0	22	0	0	0	0	4	0	0	2	0	0	0	0	0	0	0	9	3	0	0
ZBTB9	66	9	33	24	26	93	34	60	56	105	80	2	66	26	52	14	39	46	18	28	136	169	150	60	16	18	131	125	42	71	22	84	56	14	243	77	27	22	2	12	10	12	6	22	62	110	42	50	2
MIR5004	0	0	0	0	0	0	0	0	0	0	0	0	0	0	0	0	0	0	0	0	0	0	0	0	0	0	0	0	0	0	0	0	0	0	0	0	0	0	0	0	0	0	0	0	0	0	0	0	0
SYNGAP1	275	83	121	66	58	101	135	299	557	1143	87	2	314	98	199	83	162	313	133	323	949	2532	1308	135	536	192	1350	1011	159	710	56	203	253	66	715	98	113	65	22	77	56	50	39	32	245	231	112	101	25
CUTA	272	176	264	197	75	220	102	204	312	416	215	12	227	94	258	191	247	341	75	375	724	571	395	232	127	75	499	518	292	267	144	332	360	217	1050	267	231	81	90	84	66	123	46	103	174	381	230	180	49
PHF1	176	99	175	98	68	157	107	300	344	876	118	14	253	97	108	75	198	293	164	318	1003	1836	728	274	318	126	1264	578	96	771	130	278	261	67	726	194	132	86	77	102	78	93	43	100	194	300	167	133	8
RPL12P1	0	0	0	0	3	3	0	1	6	7	3	0	4	0	4	4	2	2	0	1	5	0	2	1	4	2	14	15	0	1	1	0	2	3	24	1	0	0	0	0	0	0	0	1	1	13	2	2	0
KIFC1	96	41	16	18	20	44	6	34	203	215	26	0	37	15	54	36	129	47	2	44	80	68	77	42	43	64	341	398	8	52	40	43	54	12	843	38	45	22	33	6	10	32	18	12	40	397	31	87	2
SMIM40	0	12	0	0	4	0	0	0	0	0	0	0	0	0	0	0	0	0	0	0	0	0	0	0	0	0	0	2	0	2	0	0	0	0	0	0	0	0	0	0	0	0	0	0	0	0	0	0	0
RPS18	1283	730	1288	429	145	820	226	487	606	445	845	68	752	197	776	783	1083	1032	420	1164	1488	555	893	1328	498	80	752	1153	421	356	792	870	1143	344	1931	780	707	489	332	476	461	704	180	765	660	1725	428	780	142
VPS52	502	127	144	95	76	537	82	363	802	1306	197	8	227	71	128	78	224	584	136	137	680	1182	663	261	288	135	2137	1387	235	1332	65	229	316	99	2044	229	186	149	32	58	71	96	30	67	187	872	130	345	12
HCG25	7	0	0	0	0	4	0	8	7	43	0	0	0	0	0	2	2	7	1	6	34	24	14	5	0	0	22	24	2	40	0	0	6	0	41	0	4	1	0	0	0	1	0	2	3	17	2	0	2
LOC105375022	0	0	0	0	0	2	0	0	14	9	0	0	0	2	8	0	0	0	0	0	2	8	4	0	0	0	10	8	0	12	0	0	0	0	39	0	0	2	0	0	0	0	0	0	0	12	0	0	0
ZNF70P1	0	0	0	0	0	0	0	0	0	0	0	0	0	0	0	0	0	1	0	2	0	6	0	0	0	0	0	0	0	0	0	0	0	0	0	0	0	0	0	0	0	0	0	0	0	0	4	0	0
COL11A2	16	6	2	3	2	10	19	37	24	38	3	2	16	2	21	13	33	21	21	44	173	205	112	14	94	63	39	41	56	14	6	42	5	4	38	10	14	4	16	6	2	16	0	16	6	19	62	12	2
HLA-DPB2	1	0	0	2	0	0	8	3	1	0	0	0	9	0	0	2	2	0	0	2	6	10	6	4	1	0	2	1	8	0	0	1	4	1	0	1	0	0	0	2	3	2	1	0	0	0	5	1	4
COL11A2P1	0	2	0	0	0	0	0	0	2	0	2	0	2	0	0	4	0	0	0	9	12	4	10	0	10	51	2	0	5	0	0	0	0	7	4	8	10	0	0	0	0	0	0	0	2	0	2	0	0
HLA-DPA2	4	0	2	0	2	0	0	3	0	0	0	0	0	0	0	0	4	0	0	0	0	0	0	0	0	17	0	0	0	0	0	0	4	0	0	0	2	0	0	0	0	0	0	0	0	0	0	0	0
RPL32P1	4	0	5	0	0	0	1	0	8	32	0	0	0	0	0	0	8	1	2	0	2	49	5	0	0	0	23	2	2	8	0	0	0	0	22	2	4	0	0	0	0	1	0	0	2	0	2	2	0
HLA-DPB1	641	454	1486	1548	349	849	271	675	319	440	481	23	1276	289	1383	1615	756	896	498	2795	912	1044	1884	1044	639	412	223	591	1156	516	1676	1658	2140	951	776	1268	1100	230	1019	352	239	775	469	557	1930	79	679	597	464
HLA-DPA1	1205	891	2824	3916	251	1634	619	1381	504	1158	739	53	1201	301	2406	2365	1048	1686	716	3005	1426	1515	2687	897	806	522	199	850	2833	919	3377	4560	3315	1641	1406	2623	1406	363	1650	594	536	1444	1005	1323	3006	70	1160	1447	591
HLA-DOA	125	12	250	167	40	64	28	126	17	71	58	6	169	38	93	145	85	183	70	286	148	117	302	142	107	59	24	59	130	53	316	289	328	113	75	256	108	45	236	55	55	56	112	53	230	20	66	49	56
BRD2	2272	874	1244	846	321	1635	698	2046	3323	5263	1086	89	1961	477	1315	929	1136	2279	686	1847	4027	5494	3250	1356	1824	712	6713	5422	1301	5218	662	1721	1913	857	5917	1606	966	964	371	389	341	615	198	599	1429	3677	1226	1256	303
HLA-DMA	329	183	356	434	74	342	81	283	110	637	194	8	524	160	412	309	292	720	126	824	466	442	751	404	213	165	385	172	405	469	439	542	780	505	1229	582	364	121	299	76	77	189	163	156	528	185	199	195	247
HLA-DMB	143	54	244	233	66	217	18	133	82	222	104	3	134	54	137	241	129	196	66	410	209	200	386	156	115	117	123	104	245	134	385	269	397	166	338	283	145	82	233	30	64	83	134	62	220	18	77	96	123
HLA-Z	0	0	0	0	0	0	0	2	2	4	0	0	0	0	0	0	0	0	0	0	3	2	3	1	0	0	3	0	0	4	0	0	0	0	0	0	0	0	0	0	0	0	0	0	0	0	0	0	0
LOC100294145	117	84	77	88	20	89	61	174	124	172	91	2	115	10	149	99	99	120	22	212	185	205	134	124	160	54	166	227	86	185	47	168	92	34	409	109	70	25	33	29	47	60	34	75	100	112	127	59	20
PPP1R2P1	4	0	0	3	0	3	1	8	7	2	4	0	0	0	16	0	0	4	0	0	10	22	11	3	0	20	1	4	0	0	0	16	2	3	0	1	0	0	0	0	4	1	0	0	1	1	0	4	2
PSMB9	277	61	362	207	61	72	30	217	71	376	224	2	132	50	173	156	165	273	59	264	438	299	296	255	119	74	222	57	185	277	250	413	327	153	479	308	166	73	116	78	50	155	60	100	216	171	97	85	65
TAP1	357	39	232	85	70	312	16	232	396	1283	91	2	106	107	72	154	287	739	68	166	697	945	426	347	85	91	2112	729	167	2061	326	245	281	77	2352	121	105	112	99	32	14	148	27	47	182	1001	30	176	73
PSMB8-AS1	38	27	41	31	26	18	11	11	24	99	23	2	20	22	17	23	38	33	19	8	159	55	70	38	6	0	44	21	7	144	37	48	59	18	132	40	24	5	10	5	14	24	14	24	50	47	11	23	12
PSMB8	401	214	679	310	98	424	56	410	249	829	505	34	422	113	322	287	479	587	104	287	541	373	454	596	247	119	919	433	323	547	373	425	544	185	1399	421	366	237	158	179	121	367	128	202	261	1027	215	293	90
TAP2	209	28	151	123	45	314	41	267	472	1672	82	8	94	123	90	104	332	1080	77	169	1030	1180	499	284	102	106	2410	723	154	2278	199	132	252	107	2172	142	141	115	65	29	16	85	20	49	236	981	41	207	92
HLA-DOB	79	4	75	110	45	20	0	14	6	32	2	0	38	18	12	93	23	52	10	64	249	103	24	86	20	33	6	2	32	24	117	87	145	79	36	90	40	27	85	18	19	23	17	18	50	17	6	6	60
HLA-DQB2	63	21	96	104	16	32	23	75	13	32	27	1	76	7	90	39	7	61	13	178	117	59	90	71	30	130	19	25	128	14	126	171	170	44	44	134	58	2	98	48	12	24	47	42	80	4	29	43	64
MIR3135B	0	0	0	0	0	0	0	0	0	0	0	0	0	0	0	0	0	0	0	0	0	0	0	0	0	0	0	0	0	0	0	0	0	0	0	0	0	0	0	0	0	0	0	0	0	0	0	0	0
HLA-DQA2	55	11	169	73	5	46	5	61	11	76	21	0	6	23	75	229	2	57	41	173	566	122	35	148	58	52	19	31	93	35	446	172	235	18	68	135	60	3	150	56	18	85	122	122	38	23	0	55	32
LOC102725019	0	0	0	0	0	0	0	4	0	0	0	0	0	0	0	0	0	0	0	0	0	0	0	0	0	0	0	0	0	0	0	0	0	2	0	0	0	0	0	0	0	0	0	0	0	0	0	0	0
HLA-DQB1	107	41	216	185	60	51	100	93	31	269	319	15	233	179	154	99	707	817	61	159	111	169	1488	98	47	54	38	63	345	39	350	202	207	199	76	138	69	141	182	38	29	92	97	68	555	13	232	49	24
HLA-DQA1	238	99	518	258	159	42	66	149	15	96	152	12	180	72	212	84	346	370	85	144	332	99	1185	138	71	10	40	32	455	47	248	177	168	503	46	70	87	186	277	31	53	125	30	117	385	28	266	20	68
LOC107987459	0	0	0	0	0	0	0	0	0	0	0	0	0	0	0	0	0	0	0	0	0	0	0	0	0	0	0	0	0	0	0	0	0	0	0	0	0	0	0	0	0	0	0	0	0	0	0	0	0
HLA-DRB1	246	228	1474	382	160	143	155	376	557	858	601	44	361	92	268	596	1207	2533	316	513	408	475	1174	595	388	332	595	922	1793	397	792	457	1128	587	1233	424	472	444	466	265	478	351	309	227	938	160	474	90	318
FAM8A5P	0	0	0	0	0	0	0	0	0	0	0	0	0	0	0	0	0	0	0	0	0	0	0	0	0	0	0	0	0	0	0	0	0	0	0	0	0	0	0	0	0	0	0	0	0	0	0	0	0
HLA-DRB7	0	0	0	0	0	0	0	0	0	0	0	0	0	0	0	0	0	0	0	0	0	0	0	0	0	0	0	0	0	0	0	0	0	0	0	0	0	0	0	0	0	0	0	0	0	0	0	0	0
LOC100294316	0	0	0	0	0	0	0	0	0	0	0	0	0	0	0	0	0	0	0	0	0	0	0	0	0	0	0	0	0	0	0	0	0	0	0	0	0	0	0	0	0	0	0	0	0	0	0	0	0
PRKRAP1	0	0	0	0	0	0	0	0	0	0	0	0	0	0	0	0	0	0	0	0	0	0	0	0	0	0	0	0	0	0	0	0	0	0	0	0	0	0	0	0	0	0	0	0	0	0	0	0	0
HLA-DRB8	0	0	0	0	0	0	0	0	0	0	0	0	0	0	0	0	0	0	0	0	0	0	0	0	0	0	0	0	0	0	0	0	0	0	0	0	0	0	0	0	0	0	0	0	0	0	0	0	0
HLA-DRB4	0	0	0	0	0	0	0	0	0	0	0	0	0	0	0	0	0	0	0	0	0	0	0	0	0	0	0	0	0	0	0	0	0	0	0	0	0	0	0	0	0	0	0	0	0	0	0	0	0
HLA-DRB9	2	0	2	0	0	0	0	0	0	2	0	0	0	0	0	0	0	0	0	0	1	0	0	0	0	0	0	0	0	2	0	0	0	0	2	0	0	1	0	0	0	0	0	1	0	0	0	2	0
RNU6-603P	0	0	0	0	0	0	0	0	0	0	0	0	4	0	0	0	0	0	0	8	0	0	0	0	0	0	0	0	0	2	0	0	0	0	0	0	0	0	0	0	0	0	0	0	0	0	0	0	0
HNRNPA1P2	0	0	2	0	3	0	0	8	4	4	0	0	4	2	0	0	0	4	4	14	8	27	2	0	0	0	3	0	0	2	0	0	2	1	0	0	0	4	0	0	0	0	0	0	2	0	0	2	0
TSBP1	17	0	0	0	0	10	5	3	0	43	0	0	13	2	4	3	3	2	2	0	48	78	33	4	13	26	3	17	8	30	0	3	4	6	7	2	0	0	0	1	0	0	0	0	9	0	0	0	1
NOTCH4	672	52	14	16	37	88	374	131	525	1357	19	0	217	71	110	9	286	1066	213	79	2458	3247	4465	76	346	280	721	848	54	482	17	64	68	12	697	17	40	43	2	11	13	244	0	23	109	69	155	62	0
GPSM3	221	100	356	262	96	188	117	223	147	270	152	14	425	94	300	371	187	264	84	523	708	765	614	287	224	307	190	191	142	203	344	349	543	166	196	228	346	61	150	75	84	146	46	80	343	37	160	109	42
PBX2	426	233	308	257	122	453	204	383	662	1170	253	22	413	135	315	298	367	553	193	439	1212	1920	1176	418	352	173	1561	981	293	1029	233	518	409	239	1139	322	283	161	106	135	121	196	47	179	392	688	340	319	67
AGER	21	2	6	9	16	83	22	65	129	310	8	4	49	12	0	6	30	98	47	57	254	540	299	54	39	68	540	253	10	201	2	4	50	0	310	0	20	20	0	6	0	16	0	26	51	146	28	40	8
MIR6833	0	0	0	0	0	0	0	0	0	0	0	0	0	0	0	0	0	0	0	0	0	0	0	0	0	0	0	0	0	0	0	0	0	0	0	0	0	0	0	0	0	0	0	0	0	1	0	0	0
RNF5	409	189	220	189	35	519	194	450	430	649	402	9	489	141	286	125	239	470	70	560	306	513	477	191	257	100	835	508	335	334	77	498	295	207	1401	480	229	105	34	74	63	127	36	70	237	288	312	259	42
MIR6721	0	0	0	0	0	0	0	0	0	0	0	0	0	0	0	0	0	0	0	0	0	0	0	0	0	0	0	0	0	0	0	0	0	0	0	0	0	0	0	0	0	0	0	0	0	0	0	0	0
AGPAT1	216	195	288	118	56	413	118	466	759	1031	287	23	447	85	200	200	231	750	167	717	557	894	739	402	333	151	1633	1171	360	543	159	453	363	81	1288	301	266	97	79	110	95	127	78	92	225	641	256	284	50
EGFL8	0	0	0	0	0	0	0	0	2	1	0	0	0	0	0	0	0	0	0	0	8	4	1	0	0	0	4	0	0	2	0	0	0	0	4	0	0	0	0	0	0	0	0	0	0	0	0	1	0
PPT2-EGFL8	6	2	0	0	0	1	0	2	15	18	0	0	0	0	0	0	0	3	0	0	21	18	4	0	4	2	12	17	0	15	0	0	0	0	8	0	0	0	0	0	0	0	0	0	4	2	0	2	0
PPT2	8	24	24	10	4	0	8	24	39	89	0	0	14	9	20	8	39	49	14	26	150	287	78	31	24	14	101	102	10	123	8	26	6	4	141	2	4	8	0	0	0	6	0	1	8	92	15	6	4
LOC100507547	0	1	2	0	0	0	4	0	5	2	0	0	1	0	2	0	0	2	0	0	6	26	4	1	0	0	4	2	0	7	0	0	0	0	12	0	0	2	0	0	0	0	2	0	2	3	0	1	0
PRRT1	22	6	16	4	1	7	10	14	32	65	14	0	16	0	4	12	27	4	28	56	49	226	85	16	49	25	79	20	0	49	8	17	2	2	32	6	12	2	2	8	6	2	2	6	24	30	22	2	0
TNXB	173	89	180	49	100	169	280	253	613	2926	42	14	152	68	137	84	359	407	556	258	2619	5731	1466	263	1175	502	921	831	152	299	64	222	294	87	826	142	34	61	46	65	39	186	60	24	117	48	276	63	19
CYP21A2	4	0	4	4	0	2	0	0	6	5	0	0	0	0	0	0	2	6	2	0	9	27	4	0	0	12	12	4	11	5	0	0	7	0	2	0	2	0	0	4	0	0	0	1	0	0	2	0	0
C4B	81	20	118	335	34	30	19	115	42	320	49	0	0	108	26	200	548	61	79	58	894	818	261	174	14	37	154	135	8	216	242	69	507	105	295	845	149	29	140	4	16	25	46	8	60	15	16	16	734
STK19B	0	0	0	0	0	0	0	0	0	0	0	0	0	0	2	0	0	2	0	0	2	0	0	0	0	0	0	0	0	9	0	0	4	0	4	0	0	0	2	0	0	0	0	2	0	0	0	0	1
TNXA	0	0	0	0	0	6	0	1	3	22	0	2	0	0	0	0	2	2	0	2	28	33	47	0	18	1	20	13	0	7	0	2	17	1	4	2	6	0	0	0	0	0	0	0	4	2	0	2	10
CYP21A1P	12	0	2	4	4	6	0	2	2	7	0	0	0	0	0	0	8	0	2	0	32	39	9	2	0	4	5	2	0	6	0	4	16	0	18	0	0	0	0	0	4	0	0	0	4	2	0	6	0
C4B_2	0	0	0	0	0	0	0	0	0	0	0	0	0	0	0	0	0	0	0	0	0	0	0	0	0	0	0	0	0	0	0	0	0	0	0	0	0	0	0	0	0	0	0	0	0	0	0	0	0
STK19	13	8	15	6	2	14	17	26	59	133	34	2	20	20	39	6	15	25	16	24	88	159	44	29	27	28	191	120	28	93	6	59	11	10	187	10	16	22	2	12	20	18	4	6	9	85	20	14	0
DXO	58	30	40	11	14	67	32	80	239	395	44	6	69	22	34	22	58	105	33	95	203	469	202	59	62	64	528	412	47	208	15	42	69	22	686	26	36	27	14	9	15	9	0	6	76	139	26	38	8
SKIV2L	218	37	148	47	50	392	59	353	900	1469	169	16	151	70	60	86	228	537	103	73	698	1499	771	241	233	194	2464	1519	91	1168	73	127	188	58	2815	155	164	197	35	34	62	55	10	62	127	894	54	273	17
MIR1236	0	0	0	0	0	0	0	0	0	0	0	0	0	0	0	0	0	0	0	0	0	0	0	0	0	0	0	0	0	0	0	0	0	0	0	0	0	0	0	0	0	0	0	0	0	0	0	0	0
NELFE	438	231	239	133	70	388	82	260	520	500	290	28	337	54	305	184	293	427	148	296	510	587	451	220	455	148	868	916	202	437	121	333	270	115	1362	266	265	136	52	93	102	185	42	119	241	552	276	234	24
CFB	199	85	334	158	60	417	12	477	313	2532	131	2	82	179	243	209	470	1816	24	280	282	468	547	243	92	48	2100	435	620	3425	173	218	1138	107	5731	267	244	211	98	59	16	105	274	66	163	718	68	274	137
C2-AS1	2	0	0	0	0	0	0	0	0	5	2	0	4	0	0	0	0	0	0	0	2	14	0	4	0	0	4	2	0	13	0	0	2	0	27	2	0	0	0	0	0	0	0	0	6	3	0	0	0
C2	348	66	325	275	42	103	25	120	148	636	85	4	171	46	121	164	140	222	52	248	532	878	456	174	115	64	446	254	157	607	409	198	468	169	1465	188	182	65	140	40	41	83	142	68	276	100	25	75	106
LOC107986588	4	0	8	0	4	30	0	13	47	129	4	0	0	16	1	0	5	15	2	0	14	23	6	19	12	12	214	77	1	170	0	0	0	0	120	0	2	17	0	1	0	6	0	0	4	75	0	28	0
EHMT2	352	105	214	95	84	324	143	301	383	714	359	20	304	98	233	117	266	321	118	352	720	1067	664	279	415	196	1035	648	152	659	123	302	395	142	2077	143	215	109	54	73	64	74	36	64	179	571	196	286	35
SLC44A4	903	534	490	230	106	2405	115	1924	5115	7533	743	38	674	640	902	470	632	5681	115	841	435	1024	865	937	817	256	22592	8662	2242	11777	327	879	1145	203	18285	1040	507	1071	170	204	196	520	270	219	399	6180	630	1698	297
NEU1	120	52	116	99	41	117	29	209	464	637	47	6	82	48	117	116	69	281	67	176	483	473	220	181	96	98	1224	770	143	1200	142	239	202	86	1371	174	106	138	62	58	24	58	32	73	141	396	61	87	41
VARS1	465	69	251	114	60	235	75	245	1400	1395	326	10	321	95	250	190	570	1031	125	251	812	873	443	301	151	92	2193	2088	145	618	237	307	309	191	3719	271	357	107	77	55	83	75	42	64	227	1821	130	237	38
VWA7	95	36	31	29	0	159	37	136	817	582	26	7	66	36	6	32	19	561	16	93	94	240	54	42	93	43	1695	1479	74	734	38	50	44	24	635	22	30	106	14	23	2	49	14	16	27	583	85	74	10
SAPCD1-AS1	0	0	0	0	0	1	0	0	4	5	0	0	0	0	0	0	0	1	0	0	3	0	0	0	1	0	9	11	3	4	0	0	1	0	4	2	1	0	0	0	0	0	0	0	0	4	0	0	0
SAPCD1	0	0	0	0	0	0	0	0	0	0	0	0	0	0	0	0	0	0	0	0	0	0	0	0	0	0	0	0	0	0	0	0	0	0	0	0	0	0	0	0	0	0	0	0	0	0	0	0	0
RNU6-850P	0	0	0	0	0	0	0	0	6	7	0	0	2	0	0	0	2	4	0	0	1	8	1	0	0	0	0	4	0	6	0	0	0	0	11	0	0	0	0	0	1	6	0	0	0	29	0	1	0
MSH5	0	0	0	0	0	0	4	0	4	7	0	0	0	0	0	0	0	5	0	0	2	2	2	1	0	0	18	0	0	0	0	0	0	0	24	0	0	0	0	0	0	0	0	0	2	17	0	1	0
MSH5-SAPCD1	0	0	0	0	0	0	0	0	0	0	0	0	0	0	0	0	0	0	0	0	0	0	0	0	0	0	0	0	0	0	0	0	0	0	0	0	0	0	0	0	0	0	0	0	0	0	0	0	0
LOC105375020	0	0	0	0	0	0	0	6	2	12	2	0	0	0	0	0	2	6	0	0	4	9	0	0	6	18	15	22	0	12	0	5	0	0	23	0	0	0	0	0	0	0	0	0	1	22	0	0	0
CLIC1	2516	1540	1382	1121	514	2247	451	3035	7493	6061	2238	64	2964	562	2195	1619	2610	5178	305	2207	2258	2825	2487	1874	1859	538	11726	11775	2456	3764	869	2416	1847	923	9963	2356	1712	885	447	599	650	1182	243	823	1010	7033	1374	1777	557
DDAH2	225	120	210	90	44	325	82	319	915	634	245	12	288	92	131	134	313	535	79	158	464	898	610	233	295	67	2013	1427	112	401	59	202	392	82	1021	183	187	111	64	58	104	84	20	64	97	644	136	207	25
MPIG6B	8	2	2	2	0	17	2	24	53	72	0	0	12	0	2	10	10	18	1	0	19	108	27	7	2	8	158	95	9	23	7	10	19	0	29	4	6	0	2	0	0	2	0	2	2	88	2	4	1
LY6G6C	4	0	2	0	0	0	2	4	18	2	5	2	0	0	6	2	0	6	0	4	4	12	7	0	2	0	17	29	0	2	0	16	0	0	1	0	0	0	0	12	4	16	0	0	2	10	6	0	0
LY6G6D	0	0	0	0	0	0	0	0	0	0	0	0	2	0	0	0	0	0	0	0	0	0	0	0	0	0	0	0	0	0	0	0	0	0	0	0	0	0	0	0	0	0	0	0	0	0	0	0	0
LY6G6E	0	0	0	0	0	0	0	2	0	0	0	0	0	0	0	0	0	0	0	0	0	2	0	0	0	0	0	2	0	0	0	0	0	0	0	10	0	0	0	0	0	0	0	0	0	0	0	0	0
LY6G6F	0	0	0	0	0	0	0	0	0	0	0	0	0	0	0	0	0	0	0	0	0	0	0	0	0	0	0	0	0	0	0	0	0	0	0	0	0	0	0	0	0	0	0	0	0	0	0	0	0
LY6G6F-LY6G6D	0	0	0	0	0	0	0	0	0	0	0	0	0	0	0	0	0	0	0	0	0	0	0	0	0	0	0	0	0	0	0	0	0	0	0	0	0	0	0	0	0	0	0	0	0	0	0	0	0
MIR4646	0	0	0	0	0	0	0	0	0	4	0	0	0	0	0	0	0	0	0	0	4	0	0	0	0	0	1	4	0	2	0	0	0	0	6	0	0	0	0	0	0	0	0	0	0	0	0	0	0
LOC105375018	0	0	2	0	0	18	1	4	38	26	0	0	0	0	0	0	4	19	0	0	19	45	13	5	4	0	56	72	0	59	1	0	0	0	55	0	0	2	0	0	0	0	0	0	8	25	0	13	0
ABHD16A	91	40	65	22	24	195	43	132	555	646	77	6	86	69	29	44	156	547	44	48	346	626	140	121	123	58	1500	1161	70	710	47	45	113	43	1519	52	62	71	25	17	6	45	22	17	43	606	36	150	20
LOC105375019	3	0	0	0	0	2	0	1	17	20	2	2	4	3	0	0	2	8	2	0	3	4	10	2	0	3	34	52	0	11	0	0	2	0	18	0	0	3	0	0	0	0	0	0	0	17	4	0	0
LY6G5C	20	10	8	0	4	12	0	14	39	30	18	0	6	2	0	6	16	16	0	6	14	15	9	8	7	0	47	54	4	12	2	6	12	4	49	10	8	2	0	0	0	2	0	2	2	15	1	10	0
LY6G5B	99	12	8	6	4	48	25	57	351	409	29	0	39	32	12	0	60	194	24	20	234	589	239	68	67	15	638	457	8	280	8	22	29	10	774	24	39	18	4	6	0	8	0	2	36	245	16	44	0
CSNK2B	555	308	233	235	68	437	148	424	784	784	371	20	520	191	272	178	452	719	114	735	529	953	666	321	418	174	1629	1438	362	678	121	417	518	152	2205	547	312	203	68	74	105	126	76	108	368	694	380	450	57
GPANK1	80	34	89	39	17	148	47	111	103	239	85	12	129	18	73	49	54	106	54	108	196	253	220	101	121	26	249	153	51	224	33	43	131	51	514	81	36	72	34	20	14	45	17	39	89	166	104	95	28
C6orf47	152	42	135	54	44	167	66	195	448	480	143	4	149	47	49	57	105	288	46	150	277	337	183	159	107	26	875	500	134	344	56	158	117	62	1035	101	80	67	48	41	9	72	20	55	54	463	101	82	14
APOM	5	6	8	2	2	16	2	11	37	56	8	0	15	4	1	0	14	11	7	10	27	45	20	6	14	8	73	95	0	47	8	6	8	14	138	2	1	1	0	0	2	14	4	1	0	55	2	8	0
BAG6	1380	480	738	535	207	1259	387	1306	2407	4014	1160	59	1190	399	736	529	947	1983	257	1314	2202	3842	1970	882	1066	602	7025	4508	1044	2799	445	1125	1236	601	8920	1231	802	410	245	234	233	273	128	227	700	2316	617	1145	77
MIR6832	1	0	0	0	0	0	0	0	1	9	0	0	0	0	0	0	0	4	3	0	5	3	0	0	0	0	3	0	0	1	0	0	0	0	3	0	0	0	0	0	0	0	0	0	0	5	0	0	0
SNORA38	3	11	14	0	0	28	0	4	17	9	4	0	10	0	0	4	23	18	1	0	24	21	14	2	24	6	25	14	0	30	2	0	13	0	37	8	20	16	0	4	2	1	0	2	0	13	2	10	0
PRRC2A	1727	729	1349	821	399	1558	691	1651	3237	5288	1374	82	1519	549	1334	1033	1441	2753	839	1643	4230	7578	4001	1555	1999	951	8030	5270	1298	3848	719	1799	2239	699	11131	1357	1258	754	432	420	425	468	126	424	1332	3823	1372	1397	170
AIF1	133	62	479	231	37	107	82	125	54	60	136	0	231	53	242	296	119	125	84	452	142	93	272	350	137	59	24	78	50	85	308	282	229	158	47	208	311	51	114	66	107	218	56	144	221	26	100	107	53
UQCRHP1	0	0	0	0	0	0	0	3	0	0	0	0	0	0	0	0	0	0	0	0	0	0	0	0	0	9	0	0	0	0	0	0	0	0	0	0	0	0	0	0	0	0	0	0	0	0	0	0	0
NCR3	2	0	1	0	0	0	0	8	0	0	6	0	6	0	6	0	8	4	0	0	4	16	0	2	0	0	0	0	0	12	6	0	4	0	2	0	0	0	4	2	0	0	0	2	10	0	0	0	2
LST1	90	49	100	60	17	6	4	35	24	38	24	2	94	22	98	70	32	81	23	69	54	62	117	92	42	17	26	33	15	24	66	46	66	50	18	84	97	4	35	9	16	30	22	18	103	6	37	32	14
LTB	43	2	55	22	34	20	4	12	12	66	12	0	25	4	26	109	124	59	10	14	118	45	26	78	20	26	14	18	4	104	106	72	415	23	95	84	50	2	76	0	10	6	4	2	50	7	8	6	6
TNF	16	10	18	12	6	16	0	0	6	82	6	0	12	8	6	19	10	27	15	8	21	79	34	32	2	12	40	16	4	65	10	30	50	0	31	14	18	10	23	0	8	14	0	8	15	2	2	6	4
LTA	8	4	0	0	6	4	2	1	11	37	2	0	2	0	12	4	11	13	5	4	51	33	18	0	12	7	31	33	24	24	4	0	30	0	38	6	8	4	8	0	0	4	2	0	22	2	0	4	2
LOC100287329	19	2	2	0	0	0	6	0	10	27	2	0	6	2	0	2	0	4	2	0	25	41	33	12	4	0	24	16	14	34	0	0	4	2	30	0	0	2	0	0	0	0	0	0	4	7	0	0	0
NFKBIL1	95	77	65	25	10	69	48	101	221	238	134	6	152	36	92	44	57	163	57	184	184	289	306	68	120	34	449	378	92	195	30	71	112	67	526	88	80	52	26	25	43	44	34	17	100	126	154	119	10
ATP6V1G2	5	0	4	2	0	0	4	2	0	6	0	0	0	6	8	0	0	4	2	8	23	29	15	0	18	0	6	18	20	14	0	19	24	4	12	0	0	0	0	2	0	4	0	2	0	0	8	4	0
DDX39B-AS1	2	0	0	0	0	0	0	4	0	8	0	0	0	0	0	0	2	2	1	14	16	6	4	2	0	0	6	2	0	12	0	0	0	0	13	0	0	0	0	0	0	0	0	0	4	6	2	2	0
SNORD84	10	0	0	0	0	1	0	0	18	33	0	0	0	0	2	0	0	16	2	0	9	30	7	15	0	0	21	23	0	31	0	0	2	0	57	0	0	1	0	0	0	0	0	2	2	18	0	3	0
SNORD117	3	0	0	0	0	0	0	4	27	47	0	0	0	8	0	0	1	0	0	0	13	74	8	0	0	0	53	15	0	16	0	0	0	0	51	0	0	0	0	0	0	0	0	0	2	2	0	0	0
DDX39B	0	0	0	0	0	0	0	0	0	0	0	0	0	0	0	0	0	0	0	0	0	0	0	0	0	0	0	0	0	0	0	0	0	0	0	0	0	0	0	0	0	0	0	0	0	0	0	0	0
ATP6V1G2-DDX39B	0	0	0	0	0	0	0	0	0	5	0	0	0	1	0	0	0	0	0	0	6	4	4	0	0	0	8	1	4	2	0	0	4	0	3	0	0	0	0	4	0	2	0	0	0	3	0	0	0
MCCD1	0	0	0	0	0	0	0	0	0	4	0	0	0	0	0	0	0	0	2	0	7	2	0	0	0	2	8	0	5	1	0	0	0	0	1	0	0	0	0	0	0	2	0	0	0	1	0	0	0
RPL15P4	0	0	0	0	0	0	0	0	0	0	0	0	0	0	0	0	0	0	0	0	0	0	0	0	0	0	0	0	0	0	0	0	0	0	0	0	0	0	0	0	0	0	0	0	0	0	0	0	0
PPIAP9	0	0	2	2	0	1	0	0	0	0	0	0	2	0	1	0	0	0	0	0	2	0	0	0	0	0	2	0	0	0	0	4	0	0	1	4	0	0	0	0	0	0	0	0	0	1	0	0	0
MICB	18	5	37	21	3	32	8	40	40	79	11	2	32	12	42	39	14	42	13	26	132	69	72	28	36	8	99	48	28	44	47	35	44	34	154	19	45	10	21	12	2	21	6	16	39	4	6	24	2
MICB-DT	4	11	4	8	0	4	8	8	17	42	10	0	6	8	10	0	0	6	0	0	56	26	42	8	5	0	13	22	4	56	2	9	8	0	22	14	6	0	4	0	4	2	0	4	4	3	2	10	2
HCG26	28	28	6	4	6	28	8	20	16	129	8	0	45	6	36	0	18	25	11	2	137	84	71	22	4	27	32	52	20	132	10	33	23	19	51	16	3	8	17	2	2	33	2	8	36	36	11	16	6
HCP5	192	84	167	174	64	196	33	214	246	739	128	8	200	23	152	97	235	224	64	202	877	428	527	272	149	52	290	496	383	1312	209	324	286	120	541	188	140	88	149	75	20	267	123	134	200	520	76	183	66
HLA-X	0	0	0	0	0	0	0	0	1	0	0	0	0	0	0	0	0	0	2	0	4	0	7	0	0	0	0	2	0	6	0	0	0	0	5	0	0	0	0	0	0	0	0	0	0	0	0	0	0
LINC01149	0	0	0	0	0	0	0	2	0	2	0	0	0	0	0	0	0	2	0	14	6	8	0	0	0	0	2	2	0	1	0	0	0	0	2	0	0	0	0	0	0	0	0	0	0	2	6	0	0
MICA	97	27	32	10	20	205	39	137	239	294	45	4	59	44	27	8	63	234	45	69	286	525	211	130	87	45	390	378	62	832	19	61	39	18	338	45	35	77	2	16	6	19	6	12	33	394	54	150	2
MICA-AS1	18	14	14	7	7	76	20	44	51	109	23	0	10	2	5	8	8	20	7	10	80	162	45	39	24	0	78	92	14	144	10	36	40	6	86	37	4	15	8	9	0	8	3	12	3	59	12	33	0
LOC105379664	0	0	0	0	0	0	0	0	0	0	0	0	0	0	0	0	0	0	0	0	0	0	0	0	0	0	0	0	0	0	0	0	0	0	0	0	0	0	0	0	0	0	0	0	0	0	0	0	0
MIR6891	0	0	0	0	0	0	0	0	0	0	0	0	0	0	0	0	0	0	0	0	0	4	2	0	0	0	0	1	0	0	0	0	0	0	0	0	2	0	0	0	0	0	1	0	0	0	0	0	0
HLA-B	3646	1206	5581	3159	866	3189	422	3598	2134	10813	2370	149	1236	1821	2024	3047	2428	7104	1339	2672	13875	8530	4180	4809	1549	1095	17372	3490	3549	14419	6491	4745	6286	2667	33111	3179	2240	1959	3256	1267	590	3021	1598	1759	3287	6145	1385	2194	1711
LINC02571	0	0	0	0	0	0	0	0	0	0	0	0	2	0	0	0	1	0	0	0	0	0	0	0	0	0	0	0	0	0	0	0	0	0	0	0	0	0	0	0	0	0	0	0	0	0	0	0	0
RPL3P2	16	19	17	19	4	10	4	12	24	23	22	0	27	0	31	21	17	26	6	46	58	28	44	39	9	4	33	47	34	12	12	21	41	17	18	29	26	7	9	10	4	10	4	14	29	25	38	19	5
USP8P1	9	5	5	3	0	9	0	5	10	27	5	0	5	0	0	2	8	29	2	14	31	7	19	11	6	42	36	26	2	38	9	23	10	7	37	11	1	13	6	0	2	8	2	14	8	30	0	7	0
HLA-C	1879	561	1928	2632	515	3375	451	4172	2893	16536	1059	88	1559	1047	1962	1499	1843	5880	442	2784	7971	8046	2902	2547	1558	559	6141	3739	2575	10520	2951	2529	4403	2079	13959	3237	1705	1460	1929	433	232	1512	620	558	2483	3528	940	1955	1691
HCG27	9	0	18	2	4	28	3	10	10	43	4	0	0	13	0	6	6	8	20	10	93	96	16	13	2	0	69	31	0	132	4	0	0	2	213	0	2	0	0	1	4	6	0	0	14	14	5	17	0
PSORS1C3	61	10	16	2	0	105	11	41	198	391	10	0	20	46	11	4	43	344	5	20	46	81	37	47	4	38	3048	302	12	645	0	16	5	7	718	14	6	10	0	0	0	6	2	2	11	513	2	78	4
POU5F1	38	8	12	0	1	48	10	39	159	190	6	0	2	14	12	0	25	129	2	6	32	80	16	19	4	12	857	215	0	431	0	0	14	0	603	6	14	15	0	0	6	8	0	0	7	285	4	27	0
TCF19	61	58	88	48	38	69	34	133	223	346	67	2	107	12	88	117	145	114	31	61	293	254	284	108	159	40	337	436	64	136	64	162	123	82	1242	35	97	61	38	24	50	42	10	30	123	298	42	86	18
RNU6-1133P	0	0	0	0	0	0	0	0	0	0	0	0	0	0	0	0	0	0	0	0	0	0	0	0	0	0	0	0	0	0	0	0	0	0	0	0	0	0	0	0	0	0	0	0	0	0	0	0	0
HCG22	0	0	0	2	0	2	0	0	0	0	0	0	0	0	2	0	2	0	0	0	5	2	4	0	0	0	0	0	0	4	0	0	8	0	0	0	0	0	0	0	0	0	0	0	0	0	0	0	0
MUC22	1	0	0	2	0	0	0	0	2	0	6	0	2	0	10	8	0	0	0	0	6	0	0	2	2	0	0	1	0	0	0	10	1	0	0	5	6	0	0	0	0	0	0	0	2	3	0	0	0
LINC00243	0	0	6	0	2	0	0	0	2	18	0	0	0	0	0	0	0	2	0	6	19	10	2	4	0	0	7	4	0	6	0	0	0	0	17	10	6	0	0	2	0	0	0	0	2	0	0	0	0
HCG20	0	0	0	2	0	0	0	1	8	8	1	0	8	1	0	0	0	0	0	0	4	2	0	0	7	0	6	6	6	5	0	0	0	0	6	0	2	0	0	0	0	0	0	0	0	2	0	2	0
RN7SL353P	0	0	0	0	0	0	0	1	0	0	0	0	0	0	0	0	2	0	0	0	0	2	0	0	0	0	0	0	0	0	0	0	0	0	0	0	0	0	0	0	0	0	0	0	0	0	0	0	0
IER3	472	150	75	92	50	71	257	571	1556	586	332	12	240	28	210	95	576	759	57	290	104	1116	662	59	556	115	2797	2349	154	184	48	326	324	108	744	223	429	62	33	155	33	72	30	96	169	405	296	89	47
IER3-AS1	0	0	0	0	0	0	0	1	6	4	0	0	0	0	0	0	0	9	0	0	0	6	0	0	0	0	7	6	0	0	0	0	0	0	8	0	0	0	0	0	0	0	0	0	0	12	0	1	0
FLOT1	722	302	534	293	150	469	231	764	1109	1522	699	32	706	229	488	362	535	1295	251	872	1046	1581	1332	517	569	218	3078	1823	418	934	294	575	713	340	3697	765	554	266	167	143	190	300	122	226	422	1062	396	441	70
TUBB	2319	1649	2077	1118	488	1462	671	1725	3014	3751	1524	170	2229	409	2184	1787	2897	2348	720	2406	3161	4139	4160	1811	1899	460	3306	5411	1582	1730	1203	2490	2726	1002	6983	1892	2229	757	742	556	769	971	365	809	1444	4724221	1355	1562	257
MDC1-AS1	0	0	0	0	0	0	0	0	0	0	0	0	0	0	0	0	0	0	0	0	0	0	0	0	0	0	0	0	0	0	0	0	0	0	0	0	0	0	0	0	0	0	0	0	0	0	0	0	0
MDC1	290	86	152	81	46	114	88	93	316	666	84	2	127	34	144	93	216	174	158	217	690	1037	477	114	225	82	649	602	53	294	111	162	194	71	1516	134	87	54	67	59	61	66	22	44	211	398	126	141	18
LOC107987457	0	0	0	0	0	0	0	0	0	0	0	0	0	0	0	0	0	0	0	0	0	0	0	0	0	0	0	0	0	0	0	0	0	0	0	0	0	0	0	0	0	0	0	0	0	0	0	0	0
DHX16	249	70	196	68	39	335	61	289	641	1146	196	16	226	126	121	87	172	473	114	248	519	708	386	251	211	96	2051	1125	159	1212	86	164	168	77	1945	174	119	197	50	77	44	97	34	57	139	844	125	278	24
C6orf136	137	32	61	41	22	225	58	142	367	484	157	2	106	77	85	72	130	388	43	124	179	200	151	156	63	65	1263	602	88	385	34	87	84	34	1243	120	65	68	14	21	35	17	12	39	63	429	69	178	8
PTMAP1	20	34	9	2	0	38	3	25	80	63	16	2	25	4	14	0	19	20	2	4	30	33	49	2	29	2	128	125	9	81	0	18	27	0	147	4	36	15	0	4	0	2	0	10	14	43	14	29	0
ATAT1	47	23	22	16	10	130	18	109	500	617	45	0	30	37	58	16	100	272	28	40	179	411	266	65	32	39	1331	751	31	663	10	8	50	6	1388	100	33	20	5	10	8	20	16	13	53	424	17	102	12
MRPS18B	132	184	213	111	56	249	122	238	420	570	299	25	333	31	185	223	235	303	100	387	512	342	367	184	195	30	724	693	226	421	85	336	230	224	1471	218	196	104	40	71	74	143	26	109	153	474	232	182	39
PPP1R10	725	286	416	266	143	1119	236	716	1791	3095	388	14	610	219	412	256	527	1311	293	657	2084	3128	1494	690	544	232	4402	2835	227	2208	152	488	657	260	3960	647	369	476	111	168	126	223	48	201	584	1902	297	774	62
MIR877	0	0	0	0	0	0	0	0	0	0	0	0	0	0	0	0	0	0	0	0	0	0	0	0	0	0	0	0	0	0	0	0	0	0	0	0	0	0	0	0	0	0	0	0	0	0	0	0	0
ABCF1	532	201	393	225	56	468	159	687	1030	1445	380	10	394	141	419	205	448	828	173	521	674	1049	696	428	382	122	2019	1717	430	701	140	462	513	196	3007	371	387	252	117	143	136	232	43	183	331	1378	275	410	56
ABCF1-DT	4	0	0	0	0	0	0	0	9	23	0	0	0	2	0	0	2	0	0	4	10	22	6	0	4	0	19	4	0	8	0	0	0	0	27	0	2	2	0	0	0	0	0	0	2	5	0	1	0
PRR3	34	24	36	14	10	39	46	15	50	156	19	0	28	6	14	19	33	35	31	69	163	177	89	25	56	13	107	114	14	90	18	47	55	38	296	14	26	28	8	9	2	22	6	18	21	79	12	15	12
GNL1	382	206	308	101	84	179	165	344	489	862	303	26	425	106	249	225	301	422	157	544	779	1348	802	329	356	162	1053	850	418	617	141	295	579	136	1424	295	315	130	84	131	96	140	43	104	178	727	292	232	59
LINC02569	0	2	0	2	0	6	0	0	2	14	0	0	0	2	0	0	2	2	0	0	6	14	4	8	0	2	1	0	0	8	5	8	0	0	358	0	0	2	0	0	0	0	0	0	0	2	8	6	2
HLA-E	2339	1154	3247	1693	635	1684	584	1939	1595	5720	1672	87	1973	783	1499	1516	1862	3968	989	2617	7646	8523	3992	2507	1762	820	5826	2936	2775	8218	3259	3701	3837	1508	10141	2489	1348	931	1432	735	641	1814	874	1338	2711	3444	1199	1336	882
RANP1	165	113	138	72	9	186	42	157	375	400	168	4	222	39	112	108	201	272	42	192	206	179	203	126	118	6	420	586	138	164	72	147	136	103	309	180	131	62	51	38	55	88	23	45	136	437	163	185	49
SUCLA2P1	0	0	0	0	0	1	0	0	0	2	1	0	3	0	6	0	1	0	0	2	4	1	0	0	0	0	0	3	0	1	0	0	0	0	1	0	0	0	0	1	0	0	0	0	0	0	8	1	0
LOC105375012	0	0	0	4	0	0	0	1	0	0	0	0	0	0	0	0	0	0	0	0	0	0	0	0	0	0	2	0	0	2	0	0	4	2	0	0	0	0	0	0	0	0	0	0	0	0	0	0	0
MICC	0	0	0	0	0	0	0	0	2	0	0	0	0	0	0	0	2	0	0	0	0	0	2	0	2	0	0	0	0	0	0	0	0	0	0	0	0	0	0	0	0	0	0	0	0	0	0	0	0
UBQLN1P1	0	2	0	0	0	0	4	2	0	0	0	0	0	0	22	0	0	0	0	0	6	0	0	0	0	4	0	0	0	0	0	0	0	0	0	0	2	0	0	0	0	0	0	0	2	1	0	0	0
HLA-N	0	0	0	0	0	0	0	0	2	4	0	0	0	0	0	0	0	0	0	2	0	0	4	0	0	12	2	0	0	1	0	12	2	0	0	0	0	0	0	0	0	0	0	0	0	0	0	0	0
RPP21	0	0	0	0	0	0	0	0	0	2	0	0	0	0	0	0	0	0	0	0	0	2	0	0	0	0	0	0	0	0	0	0	0	0	0	0	2	0	0	0	0	0	0	0	1	0	0	0	0
TRIM39-RPP21	0	0	0	0	0	0	0	0	0	0	0	0	0	0	0	0	0	0	0	0	0	0	0	0	0	0	0	0	0	0	0	0	0	0	0	0	0	0	0	0	0	0	0	0	0	0	0	0	0
TRIM39	71	16	38	11	8	59	22	71	142	217	32	2	60	18	13	20	36	71	18	81	146	209	124	54	59	16	263	200	44	219	24	85	52	16	139	32	23	35	13	30	10	24	6	37	38	170	33	26	4
HCG18	367	115	167	62	56	164	106	270	644	1184	123	8	191	66	132	71	160	297	121	278	1033	1057	753	283	220	89	1067	1099	163	848	65	187	217	65	981	107	128	71	45	46	50	57	26	48	130	849	163	150	9
HLA-L	61	13	7	6	6	16	4	53	64	230	30	2	31	19	11	24	30	114	21	53	127	236	101	90	50	29	331	135	82	235	72	22	72	9	121	13	8	12	3	0	0	9	0	2	51	140	11	21	2
HCG17	0	0	2	0	0	0	0	0	25	34	0	0	1	0	0	0	2	12	3	0	13	24	8	5	2	0	39	15	0	16	0	0	4	0	14	0	0	0	0	4	0	0	0	0	2	11	0	6	0
PAIP1P1	3	2	0	2	0	6	2	5	25	47	0	0	0	0	12	0	2	26	0	0	29	56	9	7	2	0	86	43	0	82	0	0	0	0	46	0	0	0	0	0	6	2	0	0	2	41	0	13	0
TRIM26	844	304	383	276	113	653	270	819	1756	1687	628	24	686	174	459	344	476	1292	154	684	831	1260	931	408	542	284	3088	2489	465	1430	184	632	619	213	1220	551	501	294	131	182	96	308	78	170	396	1078	465	510	66
TRIM15	193	2	74	2	4	481	4	335	1440	1151	201	4	51	94	16	44	124	1235	0	6	12	55	4	209	29	10	3217	2113	57	1043	9	10	36	8	404	184	69	151	8	2	26	28	6	6	10	672	2	276	13
TRIM10	49	8	12	2	0	96	0	40	117	196	38	0	14	11	22	0	10	72	6	10	10	4	0	36	11	6	377	247	22	177	4	6	2	0	114	25	6	21	2	5	0	10	0	0	10	98	8	45	6
TRIM40	99	59	92	15	8	272	3	117	941	824	96	4	46	89	0	34	15	682	2	10	0	36	25	183	18	0	2127	1494	71	330	33	28	35	12	93	145	45	26	6	23	34	22	6	11	14	319	20	106	6
TRIM31-AS1	11	1	10	0	1	41	0	24	18	266	6	2	1	2	0	0	19	88	4	0	9	4	4	3	0	0	508	44	6	1150	2	0	6	0	142	2	4	9	0	6	0	0	0	0	6	171	8	33	0
TRIM31	555	36	232	60	26	1429	17	621	575	3578	559	3	421	184	67	63	294	1626	11	126	62	246	72	150	108	38	8093	911	273	14061	11	263	150	40	2600	499	187	688	39	28	73	145	12	141	94	1638	80	1070	52
RNF39	34	32	16	16	7	83	44	139	71	115	161	4	61	12	10	20	49	206	19	38	32	202	69	21	30	23	433	109	120	235	6	116	45	11	133	52	12	12	10	30	4	36	0	12	26	97	84	43	6
PPP1R11	1100	540	591	450	145	773	266	1171	1507	1819	675	42	1141	278	897	435	561	1482	141	1305	688	1011	953	603	744	97	2715	2425	1040	1139	187	1174	878	309	998	1181	688	334	198	233	221	354	137	397	524	1127	787	648	237
POLR1H	52	57	94	44	26	78	6	90	120	172	71	2	52	14	38	61	65	187	35	37	88	103	73	105	50	34	270	264	66	108	50	130	84	15	154	79	51	35	10	20	60	44	10	56	40	192	46	67	5
ETF1P1	4	1	1	8	0	0	0	13	12	24	2	0	4	2	6	0	1	10	0	1	41	17	12	2	0	0	33	21	0	54	0	7	0	0	29	0	1	4	0	1	0	2	0	0	4	16	0	2	0
HLA-J	29	1	26	4	1	48	9	36	45	193	24	0	15	41	11	2	44	100	9	28	65	347	60	31	13	50	298	31	35	371	6	20	11	5	138	1	6	19	10	0	7	23	3	2	59	44	14	45	0
HCG4P3	6	0	0	0	0	0	0	0	4	10	1	0	0	4	0	0	2	0	0	0	20	27	4	2	0	0	0	2	0	14	2	0	2	0	6	0	0	0	0	0	0	0	0	0	2	4	2	0	0
ZNRD1ASP	29	8	6	12	12	14	15	12	53	127	4	2	15	4	6	0	18	28	14	35	223	164	75	36	8	17	128	99	3	140	12	32	11	0	155	5	22	14	2	0	9	9	0	5	23	79	36	16	0
LOC353007	0	0	0	0	0	0	0	4	2	7	0	0	0	0	0	0	6	0	0	0	2	12	2	0	0	0	2	0	0	11	0	0	0	0	6	0	0	0	0	0	0	0	0	0	0	0	0	0	0
MCCD1P2	0	0	0	0	0	0	0	0	2	2	0	0	0	4	0	0	0	0	0	0	5	7	2	0	0	0	0	2	0	0	0	0	0	0	2	0	0	0	0	0	0	0	0	0	0	0	0	0	0
DDX39BP2	0	0	2	0	0	0	0	0	0	2	2	0	6	0	2	4	0	8	0	0	16	14	2	0	0	0	4	2	0	2	0	0	2	2	0	0	0	0	0	0	0	0	2	0	3	0	0	0	0
HCG9	0	0	0	0	0	0	0	1	2	1	0	0	1	0	0	0	0	1	0	0	2	4	0	0	0	0	5	0	2	19	0	0	10	0	3	5	2	0	0	0	0	0	0	0	0	4	3	0	0
HLA-A	2345	612	2674	1575	460	3094	309	3039	3677	9118	1255	63	1203	1061	1318	1368	1827	6608	530	1723	6536	6791	2877	3192	1391	919	13964	5385	3914	9136	3054	2633	3362	1071	7996	1635	1298	1091	1733	684	373	2244	853	871	1977	7922	740	1745	1097
HLA-K	57	36	13	16	8	241	26	166	198	685	53	2	0	28	33	1	40	141	20	39	63	200	150	6	110	10	19	338	28	551	6	61	41	4	115	24	26	76	3	29	6	2	8	14	17	13	27	151	7
HCG4B	16	0	3	0	2	8	4	41	58	153	9	2	0	4	2	0	2	26	3	20	40	24	27	1	6	32	2	142	0	81	4	14	8	2	48	2	8	20	0	7	0	0	3	2	4	0	0	8	0
DDX39BP1	2	0	0	0	0	2	0	0	0	11	0	0	0	2	0	0	0	4	0	0	8	0	0	0	0	0	0	6	0	0	0	0	0	2	9	0	0	0	0	0	0	0	0	0	3	0	0	0	0
HLA-H	387	72	397	179	70	518	48	289	264	1186	128	21	186	93	299	226	247	382	123	254	872	592	334	440	152	108	799	520	360	1494	365	395	486	123	1152	181	132	200	203	112	41	254	208	135	251	671	66	295	152
HCP5B	0	0	0	4	0	0	0	4	6	6	4	0	4	1	0	0	0	4	1	0	5	6	6	0	11	0	12	2	0	6	4	6	0	0	4	6	0	2	0	0	0	0	0	0	1	8	2	2	0
LOC105375010	0	4	0	0	0	4	2	0	4	2	0	0	4	0	0	8	0	2	0	19	2	2	0	3	2	6	10	6	0	0	0	0	0	0	0	0	2	0	0	0	0	0	0	0	0	0	2	0	0
HCGVIII-2	2	0	0	0	0	2	4	0	0	4	0	0	0	0	0	0	0	0	0	4	4	0	3	0	0	0	0	0	4	2	0	0	0	0	0	0	0	0	0	0	0	0	0	0	0	0	0	0	2
HLA-G	17	11	63	10	7	25	2	23	51	16	11	5	5	21	3	13	23	41	9	29	36	35	26	84	9	15	90	68	7	62	37	18	18	14	58	17	11	14	32	25	5	31	15	14	16	149	6	15	5
MICG	0	0	0	0	0	0	0	0	0	0	0	0	0	0	0	0	0	0	0	0	0	0	0	0	0	0	2	0	0	0	0	0	0	0	0	0	2	0	0	0	0	0	0	0	0	0	0	0	0
RPL7AP7	0	0	0	2	0	0	0	0	0	0	0	0	0	0	0	0	0	0	0	0	0	0	0	0	0	6	0	2	0	0	0	0	0	0	0	0	0	0	0	0	0	0	0	0	0	0	0	0	0
HLA-P	0	0	0	0	0	0	2	0	0	0	0	0	0	0	0	2	2	0	3	10	4	4	0	0	0	13	4	1	0	2	0	0	0	0	0	0	0	0	0	0	0	0	0	0	0	0	0	0	0
HCG4P9	0	0	0	0	0	0	0	0	0	0	0	0	0	0	0	0	0	4	0	0	3	0	0	0	0	3	7	4	0	0	0	0	0	0	3	0	0	2	0	0	0	0	0	0	0	3	0	0	0
HLA-V	4	0	2	0	0	0	0	7	6	22	0	0	0	6	0	0	1	0	0	0	0	0	0	0	0	3	6	10	0	2	0	0	0	0	26	0	0	0	0	0	0	0	0	0	0	2	0	0	0
HCG4	8	9	2	0	0	4	2	6	11	59	8	0	2	2	20	2	4	8	0	0	13	4	4	1	4	0	9	18	6	5	1	14	0	14	89	6	0	2	0	2	0	6	2	2	3	4	2	4	0
LOC353010	0	0	0	0	0	0	0	0	0	2	0	0	0	2	0	0	0	0	0	0	1	2	0	0	0	4	0	6	0	2	0	0	0	2	6	0	0	0	0	0	0	0	0	0	0	0	0	0	0
LOC105379663	0	0	0	0	0	0	0	0	0	0	0	0	0	0	0	0	0	0	0	0	0	0	0	0	0	0	0	0	0	0	0	0	0	0	0	0	0	0	0	0	0	0	0	0	0	0	0	0	0
IFITM4P	0	4	0	0	2	0	2	0	2	2	0	0	0	0	0	0	0	0	6	0	10	26	1	4	0	0	1	0	0	1	0	4	0	0	12	0	0	0	0	0	0	0	0	0	1	0	2	0	0
MICE	2	0	10	2	2	4	1	21	18	131	6	0	2	14	0	4	10	29	17	2	132	154	44	15	2	6	126	30	7	125	0	12	5	0	156	6	2	4	0	4	0	2	0	2	10	24	4	16	0
HLA-F-AS1	0	0	2	3	0	4	14	2	3	15	3	0	2	2	0	0	4	9	5	0	18	21	7	0	0	0	6	7	14	25	1	0	3	0	39	0	4	0	0	0	0	3	0	2	4	13	6	1	0
HLA-F	549	142	485	262	148	1230	110	555	540	3433	385	27	262	244	145	223	363	939	214	195	1501	1772	1241	658	817	415	4815	1044	343	4809	491	279	932	240	1660	302	108	358	202	113	29	281	66	109	465	1176	189	701	117
ZDHHC20P1	0	0	0	0	0	0	0	0	0	0	0	0	0	0	0	0	0	0	0	4	0	0	0	0	0	4	0	0	0	0	0	0	0	0	0	0	0	0	0	0	0	0	0	0	0	0	0	0	0
ZFP57	7	0	0	0	2	0	0	5	0	6	43	0	37	7	6	10	0	0	0	4	2	28	0	12	0	2	1090	0	0	1	0	0	4	18	1	0	0	0	8	0	0	10	0	0	4	2	0	2	0
MOG	0	0	2	2	0	0	0	6	0	4	4	0	0	4	0	0	0	0	0	0	13	4	0	2	0	0	123	0	6	0	0	0	0	1	0	4	0	0	0	0	0	0	0	0	0	0	4	0	0
SUMO2P1	352	529	355	355	129	428	141	364	280	305	403	24	738	114	642	339	292	332	138	904	407	339	722	255	355	49	352	599	453	267	181	784	544	292	340	633	339	99	103	145	107	220	61	218	358	296	569	306	102
GABBR1	286	33	46	17	56	137	107	227	603	1229	61	2	230	109	84	16	222	279	192	142	1538	4872	1785	219	602	351	1464	1016	18	767	24	92	164	22	607	9	46	30	8	25	8	82	0	40	188	51	90	84	0
OR2I1P	578	22	184	94	29	6	8	15	2	51	26	8	46	25	43	63	102	111	4	93	86	38	33	32	34	14	27	6	146	503	171	154	218	88	69	184	52	6	140	4	4	76	25	39	145	6	4	8	110
GPR53P	0	0	0	4	0	0	0	0	0	0	0	0	0	0	0	0	1	0	0	0	0	0	0	0	0	0	0	0	0	6	0	0	0	0	0	0	0	0	0	0	0	0	0	0	0	0	0	0	0
LINC01015	0	0	0	0	0	0	4	1	0	0	2	0	0	0	0	0	0	0	0	0	0	0	6	0	3	0	0	0	8	0	0	0	0	0	0	6	0	0	0	0	0	0	0	0	0	0	2	0	0
LINC02829	0	18	4	0	0	10	0	24	4	1	4	0	6	2	14	0	2	0	0	6	0	4	2	2	4	0	0	0	3	0	6	8	2	14	6	2	0	2	2	4	0	0	2	2	2	0	8	6	0
RPS17P1	0	0	0	0	0	0	0	0	0	0	0	0	0	0	0	0	0	0	0	0	0	0	0	0	0	0	0	0	0	0	0	0	0	0	0	0	0	0	0	0	0	0	0	0	0	0	0	0	0
MAS1L	0	0	0	0	0	0	4	2	2	0	2	0	0	0	0	0	0	0	0	0	4	0	0	0	6	0	2	1	0	0	2	0	2	2	0	6	0	0	0	0	0	2	0	0	0	0	0	2	2
LOC105375008	0	0	0	0	0	0	5	0	0	0	0	0	0	0	0	0	0	0	4	0	0	0	0	0	0	0	0	2	0	2	0	2	0	0	0	2	0	0	0	0	0	0	0	0	0	0	0	0	0
MAS1LP1	0	0	9	0	0	0	0	0	0	0	0	0	0	0	0	0	0	0	2	0	2	4	0	0	0	0	0	0	2	1	0	0	0	0	0	0	0	0	0	0	0	0	0	0	0	0	0	0	0
UBDP1	0	0	0	0	0	0	0	0	0	0	0	0	0	0	0	0	0	0	0	0	0	0	0	0	0	0	0	0	0	0	0	0	0	0	0	0	0	0	0	0	0	0	0	0	0	0	0	0	0
OR2H1	0	0	0	0	0	0	0	2	1	0	6	0	0	0	6	0	4	2	1	0	3	0	0	0	0	2	0	0	0	0	0	14	1	0	0	0	0	0	0	0	0	0	0	0	2	0	0	0	2
LOC105379641	0	0	0	0	0	0	0	0	0	0	1	0	0	0	0	0	0	0	1	0	0	0	0	0	0	0	0	0	0	0	0	0	0	0	0	0	0	0	0	0	0	0	0	0	0	0	0	0	0
OR10C1	0	2	0	0	0	0	0	0	0	0	0	0	0	0	0	8	0	0	0	0	0	0	0	0	0	0	0	0	0	0	0	0	0	0	0	0	0	0	0	0	0	0	0	0	0	0	0	0	0
OR11A1	0	2	0	0	0	0	0	0	0	0	0	0	0	0	0	0	0	2	0	0	2	0	0	0	0	2	0	0	6	0	0	0	0	0	0	0	0	0	0	0	0	0	0	0	0	0	2	0	0
OR12D1	4	0	0	0	0	0	0	0	0	0	0	0	4	0	0	0	0	2	0	0	8	4	0	0	0	0	0	0	0	0	0	0	0	0	0	0	0	0	0	0	0	0	0	0	0	0	0	0	0
OR12D2	0	0	0	0	0	0	0	0	0	0	0	0	0	0	0	2	0	0	0	10	3	0	0	0	0	0	0	0	0	0	0	0	0	0	0	0	0	0	0	0	0	0	0	0	0	0	2	0	0
OR12D3	8	0	0	0	0	0	0	1	0	0	0	0	0	0	0	0	0	0	0	0	2	1	0	0	0	0	0	0	0	0	0	0	0	0	2	0	0	0	0	0	0	0	0	0	0	0	0	0	0
OR5V1	0	0	2	0	2	0	1	0	0	0	0	0	6	0	2	0	0	0	0	0	0	0	2	0	0	3	2	0	0	0	0	0	4	0	0	0	0	0	0	0	0	0	0	0	0	0	1	0	0
DDX6P1	6	3	1	0	0	0	0	0	0	0	0	0	0	1	0	0	0	0	0	0	0	3	0	0	0	0	1	0	1	0	0	1	1	0	0	1	0	0	0	0	2	1	0	0	0	0	1	0	1
OR14J1	0	0	0	4	0	3	0	0	3	0	4	0	0	0	10	2	0	0	0	0	0	0	0	0	0	0	0	0	6	0	0	0	2	2	0	4	0	0	0	0	0	0	0	0	0	0	2	0	0
OR2B4P	0	0	0	0	0	0	0	0	0	8	0	0	0	0	0	0	0	0	0	0	3	0	0	0	0	0	2	0	0	0	0	0	0	0	5	0	0	0	0	0	0	0	0	0	0	4	0	0	0
LOC105375005	0	0	0	0	0	0	2	0	0	2	0	0	0	0	0	0	2	0	0	0	0	0	0	0	0	0	0	0	0	0	0	0	0	0	2	0	0	0	0	0	0	0	0	0	0	2	0	0	0
OR2U2P	0	0	0	0	0	4	0	0	0	6	2	0	0	0	0	2	0	0	0	0	0	0	0	2	0	0	11	0	0	12	0	0	0	0	1	2	0	0	0	0	0	0	0	0	0	2	0	0	0
OR2U1P	4	0	0	0	0	0	0	0	0	4	0	0	0	0	0	0	0	0	0	0	2	0	0	0	0	0	2	0	0	4	0	0	0	0	4	0	0	0	0	0	0	0	0	0	0	0	0	2	0
OR2G1P	6	0	0	0	0	2	0	0	0	7	0	0	0	0	6	0	0	0	0	0	0	0	2	4	0	0	4	0	8	8	0	0	0	1	9	2	0	0	0	0	0	0	0	0	0	4	0	2	0
LOC101929006	0	0	0	0	0	0	0	0	0	2	0	0	0	0	0	0	0	0	0	0	2	0	0	0	4	0	4	0	0	3	0	0	0	0	8	0	0	0	0	0	0	0	0	0	0	2	0	0	0
OR2H4P	4	0	0	0	0	0	0	0	0	1	0	0	0	0	2	0	1	0	0	0	0	0	0	0	0	0	0	0	0	0	0	0	0	0	0	0	0	0	0	0	0	0	0	0	0	0	0	0	0
OR2J4P	0	0	0	0	0	0	6	0	0	0	0	0	0	0	2	0	0	0	0	0	2	0	0	0	0	0	0	0	0	0	0	0	0	0	0	0	0	0	0	0	0	0	0	0	0	0	0	0	0
OR2J2	0	0	0	0	0	0	0	2	6	0	0	0	0	0	0	0	0	0	0	0	0	2	0	0	0	18	0	0	0	0	0	0	0	0	0	0	0	0	0	0	0	0	0	0	0	0	0	0	0
OR2N1P	0	0	0	0	0	0	0	0	0	0	0	0	0	0	0	0	2	0	0	4	2	4	0	0	0	17	0	2	0	0	0	0	0	2	0	0	0	0	0	0	0	0	0	0	0	0	0	0	0
OR2J3	0	10	0	0	0	0	1	0	0	0	0	0	4	0	0	0	0	0	0	0	2	0	0	2	0	6	0	0	0	0	0	2	2	0	6	1	0	0	2	0	0	0	0	0	0	0	0	2	1
OR2J1	0	0	2	0	0	0	0	0	0	0	0	0	0	0	0	0	0	0	0	0	0	0	4	0	0	0	0	0	0	0	0	0	0	0	0	0	0	0	0	0	0	0	0	0	0	0	0	0	0
OR2B3	0	0	0	0	0	0	0	0	0	0	0	0	0	0	0	0	0	0	2	0	2	0	0	0	0	0	0	0	0	0	0	0	0	0	2	0	0	0	0	0	0	0	0	0	0	0	0	0	0
SAR1AP1	4	0	1	0	2	0	4	0	3	0	0	0	0	0	0	0	1	1	1	0	2	0	0	0	0	0	0	2	0	0	0	0	0	0	0	0	0	0	0	0	0	0	0	0	0	1	0	1	0
OR2P1P	0	0	0	0	0	0	0	0	0	0	0	0	0	0	0	0	0	0	0	4	0	0	0	0	0	0	0	0	0	0	0	0	0	0	2	0	0	0	0	0	0	0	0	0	0	0	0	0	0
OR2W1	0	0	0	0	0	0	0	2	0	0	0	0	0	0	0	0	0	0	0	0	0	0	0	0	0	0	0	0	0	0	0	0	0	0	0	6	0	0	0	0	0	0	0	0	0	0	0	0	0
LOC100129636	0	0	0	0	0	0	0	0	0	0	0	0	0	0	0	0	1	0	0	0	0	0	0	0	0	0	0	0	0	0	0	0	0	0	0	0	0	0	0	0	0	0	0	0	2	0	0	0	0
OR2AD1P	0	0	0	0	0	0	0	0	0	2	0	0	0	0	0	0	0	0	0	0	0	0	0	0	0	0	0	0	0	1	0	0	0	0	1	0	0	0	0	0	0	0	0	0	0	0	0	0	0
LOC105375002	0	0	0	0	0	0	0	0	0	0	0	0	0	0	0	0	0	0	0	0	10	0	0	0	0	0	0	0	0	0	0	0	0	0	0	0	0	0	0	0	0	0	0	0	0	0	0	0	0
ZNF311	6	30	0	13	0	2	13	16	15	81	2	0	26	6	18	0	5	19	5	26	51	50	53	12	26	22	68	65	16	7	0	50	34	6	5	10	15	14	0	4	2	10	2	8	4	30	16	20	0
TRL-AAG3-1	0	0	0	0	0	4	0	0	2	0	1	0	0	0	0	0	0	0	0	0	0	0	2	0	0	0	1	0	0	0	0	0	0	0	1	0	2	0	0	0	0	0	0	0	0	0	0	0	0
HCG15	8	0	0	0	2	2	4	0	10	12	2	0	0	0	0	0	0	0	2	0	12	8	10	0	0	0	8	2	0	6	0	4	0	0	4	0	0	2	0	0	0	0	0	2	0	12	12	4	0
TRE-CTC1-6	0	0	0	0	0	0	0	0	0	1	0	0	0	1	0	0	0	0	0	0	0	0	0	0	0	0	0	0	0	0	0	4	0	0	0	0	0	0	0	0	0	0	0	0	0	0	0	0	0
TRF-GAA1-2	0	0	0	0	0	0	0	0	0	0	0	0	0	0	0	0	0	0	0	0	0	0	0	0	0	0	0	0	0	0	0	0	0	0	0	0	0	0	0	0	0	0	0	0	0	0	0	0	0
RN7SL471P	0	1	0	0	0	0	0	0	2	4	14	0	2	0	0	0	2	3	0	0	2	6	5	0	6	0	0	6	0	0	4	0	0	0	0	0	2	6	0	0	0	0	0	0	0	0	0	0	0
KRT18P1	0	0	1	0	0	0	0	0	2	3	0	0	2	0	0	0	0	0	0	1	0	2	0	0	0	0	4	2	0	0	0	0	0	0	1	3	0	0	0	0	0	0	0	0	0	2	0	0	0
TRM-CAT3-2	0	0	0	0	0	0	0	2	0	0	0	0	0	0	0	0	0	0	0	0	0	0	0	0	0	0	0	0	0	0	0	0	0	0	0	0	0	0	0	0	0	0	0	0	0	2	0	0	0
TRK-TTT3-3	0	0	0	0	0	0	0	0	0	0	0	0	0	0	0	0	0	0	0	0	0	0	0	0	0	0	0	0	0	0	0	0	0	0	0	0	0	0	0	0	0	0	0	0	0	2	0	0	0
TRM-CAT3-1	0	0	0	0	0	0	0	0	0	0	0	0	0	0	0	0	0	0	0	0	0	0	0	0	0	0	0	0	0	0	0	0	0	0	0	0	0	0	0	0	0	0	0	0	0	0	0	0	0
LINC01556	0	10	0	0	0	0	2	6	2	4	6	0	0	0	0	0	0	2	0	10	0	0	0	4	0	0	0	0	0	0	0	0	0	0	0	0	0	0	0	0	0	0	0	0	0	0	0	0	0
TRL-AAG2-2	0	0	0	0	0	0	0	0	0	0	0	0	0	1	0	0	4	7	0	0	2	0	1	0	3	0	2	0	0	0	0	1	7	0	0	0	1	0	0	0	0	4	0	1	0	0	0	0	0
TRQ-CTG1-3	0	0	0	0	0	2	0	0	0	0	0	0	0	0	0	0	0	0	0	0	0	0	0	0	0	2	0	0	0	0	0	0	0	0	0	0	0	0	0	0	0	0	0	0	0	0	0	0	0
TRL-CAA1-2	0	0	0	0	0	0	0	0	0	4	0	0	0	0	0	0	0	0	0	0	2	4	0	0	0	0	4	0	0	0	0	0	0	0	0	0	0	0	0	0	0	0	0	0	0	0	1	0	0
RNU6-930P	0	0	0	0	0	0	0	0	4	15	0	0	0	2	0	0	0	1	1	0	6	5	2	1	0	0	8	15	0	4	0	0	0	0	10	0	0	0	0	0	0	0	0	0	0	10	0	4	0
TRIM27	281	100	167	150	71	262	96	275	471	692	239	20	402	73	112	112	181	332	111	270	607	593	479	294	237	219	1009	983	221	626	128	321	248	102	747	328	203	131	90	58	90	125	49	85	231	769	212	183	42
HCG14	0	0	0	0	4	0	0	2	0	4	0	0	2	0	0	0	0	0	1	0	11	14	0	2	0	0	0	0	0	5	0	0	0	0	0	0	0	0	0	0	0	0	0	0	0	6	0	2	0
TRL-CAA1-1	0	0	0	0	0	0	0	0	0	0	2	0	0	0	0	0	0	2	0	10	4	0	0	0	2	0	2	0	0	2	0	0	4	0	0	0	0	0	0	0	0	0	0	0	0	4	0	0	0
ZNF90P2	0	0	0	0	0	0	0	0	0	0	0	0	0	0	0	0	0	0	0	0	2	0	0	0	0	0	2	0	0	0	0	0	0	0	0	0	0	0	0	0	0	0	0	0	0	0	0	0	0
TRR-CCG1-2	0	0	0	0	0	0	0	0	0	0	0	0	0	0	0	0	0	0	0	0	0	0	0	0	0	0	0	0	0	0	0	0	0	0	0	0	0	0	0	0	0	0	0	0	0	0	0	0	0
TRA-AGC2-2	0	0	0	0	0	0	0	0	0	0	0	0	0	0	0	0	0	0	0	0	0	0	0	0	0	0	0	0	0	0	0	0	0	0	0	0	0	0	0	0	0	0	0	0	0	0	0	0	0
RPL13P	0	0	0	0	0	0	0	0	0	0	0	0	0	0	0	0	0	0	0	0	0	0	0	0	0	0	0	0	0	0	0	0	0	0	0	0	0	0	0	0	0	0	0	0	0	0	0	0	0
LINC01623	0	0	0	0	0	0	0	6	0	0	0	0	0	0	0	0	0	0	0	0	0	0	0	1	0	0	0	0	0	0	0	0	0	0	2	0	0	0	0	0	0	0	0	0	0	0	0	0	0
TRA-AGC2-1	0	0	0	0	0	0	0	0	0	0	0	0	0	0	0	0	0	0	0	0	0	0	0	0	0	0	0	0	0	0	0	0	0	0	0	0	0	0	0	0	0	0	0	0	0	0	0	0	0
TRF-GAA4-1	0	0	0	0	0	0	0	0	0	0	0	0	0	0	0	0	0	0	0	0	0	0	0	0	0	0	0	0	0	0	0	0	0	0	0	0	0	0	0	0	0	0	0	0	0	0	0	0	0
TRA-TGC5-1	0	0	0	0	0	0	0	0	0	0	0	0	0	0	0	0	0	0	0	0	0	0	0	0	0	0	2	0	0	0	0	0	0	0	0	0	0	0	0	0	0	0	0	0	0	0	0	0	0
TRF-GAA3-1	0	0	0	0	0	0	0	0	0	0	2	0	0	0	0	0	0	0	0	0	0	0	0	0	0	0	0	0	0	0	0	0	0	0	0	0	0	0	0	0	0	0	0	0	0	0	0	0	0
TRA-TGC7-1	0	0	0	0	0	0	0	0	0	0	0	0	0	0	0	0	0	0	0	0	0	0	0	0	0	0	0	0	0	0	0	0	0	0	0	0	0	0	0	0	0	0	0	0	0	0	0	0	0
TRA-AGC1-1	0	0	0	0	0	0	0	0	0	0	0	0	0	0	0	0	0	0	0	0	0	0	0	0	0	0	2	2	0	0	0	0	0	0	0	0	4	0	0	0	0	0	0	0	0	0	0	0	0
TRF-GAA1-1	0	0	0	0	0	0	0	0	0	0	0	0	0	0	0	0	0	0	0	0	0	0	0	0	0	0	0	0	0	0	0	0	0	0	0	0	0	0	0	0	0	0	0	0	0	0	0	0	0
TRA-TGC1-1	0	0	0	0	0	0	0	0	0	0	0	0	0	0	0	0	0	0	0	0	2	0	0	0	0	0	0	0	0	0	0	0	0	0	0	0	0	0	0	0	0	0	0	0	0	0	0	0	0
NOP56P1	0	0	0	0	0	0	0	0	0	1	0	0	0	0	0	0	0	2	0	0	0	2	4	0	0	0	3	2	0	0	0	0	0	0	0	0	0	0	2	0	0	0	0	0	0	3	0	0	0
TRA-AGC23-1	0	0	0	0	0	0	0	0	0	0	0	0	0	0	0	0	0	0	0	0	0	0	0	0	0	0	0	0	0	0	0	0	0	0	0	0	0	0	0	0	0	0	0	0	0	0	0	0	0
TRA-TGC6-1	0	0	0	0	0	0	0	0	0	0	0	0	0	0	0	0	0	0	0	0	0	0	0	0	0	0	0	2	0	0	0	0	0	0	0	0	0	0	0	0	0	0	0	0	0	0	0	0	0
TRK-TTT7-1	0	0	0	0	0	0	0	0	0	0	0	0	0	0	0	0	0	0	1	0	0	0	0	0	0	0	0	0	0	0	0	0	0	0	0	0	0	0	0	0	0	0	0	0	0	0	0	0	0
TRR-CCG1-1	0	0	0	0	0	0	0	0	0	0	0	0	0	0	0	0	0	0	0	0	0	0	0	0	0	0	0	0	0	0	0	0	0	0	0	0	0	0	0	0	0	0	0	0	0	0	0	0	0
RPSAP2	0	0	0	0	0	0	0	2	0	0	0	0	0	0	0	0	0	0	0	0	8	0	3	0	0	4	0	0	0	0	0	0	0	0	0	0	0	0	0	0	0	0	0	0	0	0	2	0	0
TRA-CGC4-1	0	0	0	0	0	0	0	0	0	0	0	0	0	0	0	0	0	0	0	0	0	0	2	0	0	0	0	0	0	0	0	0	0	0	0	0	0	0	0	0	0	0	0	0	0	0	0	0	0
TRF-GAA11-1	0	0	0	0	0	0	0	0	0	0	0	0	0	0	0	0	0	0	0	0	2	0	0	0	0	0	0	0	0	0	0	0	0	2	0	0	0	0	0	0	0	0	0	0	0	0	0	0	0
TRT-AGT3-1	0	0	0	0	0	0	0	0	0	0	0	0	0	0	0	0	0	0	0	0	0	0	0	0	0	0	0	0	0	0	0	0	0	0	0	0	0	0	0	0	0	0	0	0	0	0	0	0	0
TRA-AGC7-1	0	0	0	0	0	0	0	0	0	0	0	0	0	0	0	0	0	0	0	0	0	0	0	0	1	0	0	0	0	0	0	0	0	0	0	0	0	0	0	0	0	0	0	0	0	0	0	0	0
TRA-CGC5-1	0	0	0	0	0	0	0	0	0	0	0	0	0	0	0	0	0	0	0	0	2	0	0	0	0	0	0	0	0	0	0	0	0	0	0	0	0	0	0	0	0	0	0	0	0	0	0	0	0
TRK-TTT13-1	0	0	0	0	0	0	0	0	0	0	0	0	0	0	0	0	0	0	0	0	0	0	0	0	0	0	0	0	0	0	0	0	4	0	0	0	0	0	0	0	0	0	0	0	0	0	2	0	0
LOC100288016	0	0	0	0	0	0	0	0	0	0	0	0	0	0	0	0	0	0	0	0	0	0	0	0	0	0	0	0	0	0	0	0	0	0	0	0	0	0	0	0	0	0	0	0	0	0	0	0	0
LOC105374297	2	2	2	0	0	0	0	0	6	27	2	0	0	0	0	0	1	11	4	0	4	2	0	3	6	6	23	13	0	26	0	2	4	0	36	0	1	0	0	0	0	0	0	0	2	73	2	2	0
LOC105374298	7	0	4	0	2	26	0	34	104	192	10	0	6	19	34	9	23	96	6	7	67	48	21	68	10	0	289	130	0	272	0	4	1	8	270	8	0	15	0	0	0	2	0	0	14	349	12	22	1
SDHAP2	108	51	33	22	17	322	31	288	853	1166	90	1	50	86	35	27	105	418	103	90	491	539	416	152	171	101	2657	1265	76	2102	13	45	73	36	895	59	43	204	8	20	16	48	0	16	52	734	72	192	0
MIR570	34	4	7	5	0	17	0	24	75	256	8	0	2	14	14	5	9	54	3	2	103	101	70	42	10	12	311	95	0	113	4	5	15	8	205	11	6	11	0	0	4	0	0	2	13	100	6	20	0
SMBD1P	60	2	15	4	6	160	32	169	375	1282	31	0	30	97	46	2	64	131	114	33	763	714	340	204	55	107	1623	637	10	974	2	14	72	24	530	11	12	66	4	2	1	25	2	9	49	567	14	96	12
MIR570HG	24	11	11	12	6	21	12	14	70	150	31	0	27	19	11	8	21	43	17	18	68	41	33	31	15	2	165	77	23	91	11	25	18	18	121	1	11	17	0	9	10	4	4	18	14	54	21	31	4
MUC20	9	12	18	20	14	189	37	98	179	313	50	2	23	41	4	8	58	252	6	60	40	223	134	60	98	53	531	352	87	598	16	18	123	18	493	24	43	70	4	12	4	14	33	8	49	200	13	159	8
MUC4	198	8	22	236	53	95	12	53	317	12186	237	0	18	104	4	49	831	2971	9	320	44	390	72	11	27	114	5804	512	506	6944	64	6	357	41	23701	261	445	272	8	38	2	94	155	4	381	643	20	150	60
LOC112268340	0	0	0	0	0	0	0	0	0	0	0	0	0	0	0	0	0	0	0	0	0	0	0	0	0	0	0	0	0	0	0	0	0	0	0	0	0	0	0	0	0	0	0	0	0	0	0	0	0
LYPLA2P1	33	26	30	24	2	19	7	45	99	72	32	5	71	7	27	20	53	155	8	20	36	60	50	33	25	16	230	199	61	57	14	41	34	4	107	29	30	31	9	14	13	33	7	7	5	136	13	52	2
MYL12BP3	0	0	0	0	0	0	0	0	0	0	0	0	0	0	0	0	0	0	0	0	0	0	1	0	0	0	1	0	0	0	0	0	0	0	0	1	0	0	0	0	0	0	0	1	0	0	0	0	0
DAXX	431	198	434	178	89	379	119	327	599	637	244	21	429	83	310	172	276	526	122	473	579	470	493	262	309	76	1097	1037	295	444	152	319	473	128	999	402	317	171	91	120	56	209	73	116	309	651	241	271	44
ZBTB22	83	49	99	51	24	122	40	141	135	254	72	2	184	27	78	47	64	160	41	160	292	457	237	95	126	40	315	276	77	313	48	90	102	57	470	78	95	44	29	24	20	46	6	30	75	163	89	94	20
TAPBP	1569	498	1267	966	308	1498	328	1514	1653	5614	574	22	985	715	968	987	1000	3976	342	1583	3226	4970	2155	1366	821	563	8092	3039	1736	5340	1304	2132	2266	874	7756	1707	915	619	631	274	245	647	401	463	1524	3046	724	1051	710
RGL2	339	81	145	104	79	203	134	305	460	818	239	16	263	54	135	125	220	395	196	212	1057	1720	978	235	529	375	1018	656	107	996	55	235	367	89	1073	100	115	85	33	78	67	109	17	103	139	462	195	218	25
MIR6834	0	0	0	0	0	0	0	0	0	0	0	0	0	0	0	0	0	0	0	0	0	0	0	0	0	0	0	0	0	0	0	0	0	0	0	0	0	0	0	0	0	0	0	0	0	0	0	0	0
PFDN6	127	33	90	54	22	87	22	37	127	146	54	12	54	15	58	76	96	90	35	78	96	126	77	53	33	0	179	214	70	70	42	63	66	26	319	102	78	38	20	14	28	43	20	51	60	169	55	86	12
MIR6873	0	0	0	0	0	0	0	0	0	0	0	0	0	0	0	0	0	0	0	0	0	0	0	0	0	0	0	0	0	0	0	0	0	0	2	0	0	0	0	0	0	0	0	0	0	0	0	0	0
WDR46	221	71	128	82	30	108	50	130	283	466	115	10	120	36	47	41	154	190	40	114	444	356	210	167	111	84	487	475	63	268	66	142	136	48	668	67	89	75	56	48	68	59	20	56	68	482	90	125	4
B3GALT4	8	6	23	4	4	58	6	44	55	131	17	0	59	6	12	18	14	73	16	29	79	109	70	31	28	14	195	74	68	202	15	17	30	6	113	18	26	28	10	4	10	16	4	6	30	71	12	14	10
RING1	236	109	170	108	67	316	134	315	513	733	217	6	327	78	291	79	157	308	69	383	500	961	511	180	307	76	917	858	203	619	83	342	272	118	930	260	179	65	46	53	50	113	13	60	198	344	215	224	60
MIR219A1	0	0	0	0	0	0	0	0	0	0	0	0	0	0	0	0	0	0	0	0	2	0	0	0	0	0	0	0	0	0	0	0	0	0	0	0	0	0	0	0	0	0	0	0	0	1	0	0	0
HSD17B8	7	4	67	14	14	52	9	67	73	120	53	0	50	12	17	10	30	43	19	38	177	147	55	66	83	57	131	163	26	73	37	67	63	38	101	43	44	32	24	20	38	26	0	7	41	102	52	38	7
SLC39A7	420	117	300	155	84	310	83	375	897	1507	100	10	162	75	265	263	318	1120	127	210	827	735	388	355	227	93	2024	1532	444	1183	236	285	322	144	2298	269	190	177	95	87	60	134	114	146	176	1888	99	241	110
RNY4P10	0	0	0	0	1	0	0	0	3	12	0	2	0	0	0	0	2	0	1	0	6	19	9	0	0	22	8	2	0	20	0	0	0	0	12	0	0	2	0	0	0	0	0	0	0	11	0	0	0
RXRB	253	85	161	41	58	267	101	293	470	949	149	10	183	100	159	115	193	280	143	241	699	1249	568	268	340	178	1284	842	135	977	81	140	222	90	1171	146	158	90	35	61	38	74	40	67	116	609	138	182	10
HCG24	0	0	0	0	0	0	0	0	0	0	0	0	0	0	0	5	0	0	0	0	0	0	0	0	0	0	0	0	0	0	0	0	0	0	0	0	0	0	2	0	0	0	0	0	0	0	0	0	0
LOC105375021	4	0	0	0	0	0	0	2	0	0	0	0	0	0	1	0	1	4	0	0	2	0	5	0	0	0	0	0	0	0	4	0	0	0	0	10	2	0	0	0	0	0	0	2	0	0	0	0	0
RNU1-116P	0	0	0	0	0	0	0	0	0	0	0	0	0	0	0	0	0	0	0	0	0	0	0	0	0	0	0	0	0	0	0	0	0	0	0	0	0	0	0	0	0	0	0	0	0	0	0	0	0
HLA-DRB2	0	0	0	0	0	0	0	0	0	0	0	0	0	0	0	0	0	0	0	0	0	0	0	0	0	0	0	0	0	0	0	0	0	0	0	0	0	0	0	0	0	0	0	0	0	0	0	0	0
HLA-DRB3	0	0	0	0	0	0	0	0	0	0	0	0	0	0	0	0	0	0	0	0	0	0	0	0	0	0	0	0	0	0	0	0	0	0	0	0	0	0	0	0	0	0	0	0	0	0	0	0	0
LOC105379657	0	0	0	0	0	0	0	0	0	0	0	0	0	0	0	0	0	0	0	0	0	0	0	0	0	0	0	0	0	0	0	0	0	0	0	0	0	0	0	0	0	0	0	0	0	0	0	0	0
RNA5SP206	0	0	0	0	0	0	0	0	0	0	0	0	0	0	0	0	2	0	0	0	0	4	0	0	0	0	0	0	0	0	0	0	0	0	0	0	0	0	0	0	0	0	0	0	0	0	0	0	0
C4A	86	15	109	351	32	12	6	77	76	282	38	0	12	101	20	199	316	72	76	136	700	667	158	74	12	76	160	106	6	145	222	30	341	117	270	418	137	33	53	6	20	18	37	4	61	24	2	20	503
ZBTB12	29	15	22	50	6	61	10	20	56	164	56	0	41	21	29	24	36	56	20	61	147	217	105	23	68	64	121	68	8	129	15	47	55	6	481	12	25	10	5	14	1	10	0	8	61	62	59	39	6
SNORD52	0	2	0	0	0	0	0	0	5	13	0	0	0	0	0	0	4	0	2	0	2	30	8	0	0	0	5	10	0	8	0	0	0	0	12	0	0	1	0	0	0	0	0	2	2	17	0	0	0
SNORD48	0	0	0	0	0	0	0	1	4	5	0	0	0	0	0	0	7	2	4	0	15	21	1	0	0	0	4	1	0	2	0	0	2	0	13	0	2	0	0	0	0	0	0	0	0	8	0	0	0
SNHG32	225	154	323	98	32	103	107	224	141	270	182	15	166	25	156	148	177	147	212	437	411	454	530	219	259	69	222	265	268	210	106	372	390	72	737	196	146	109	119	106	86	97	32	145	80	250	217	130	37
HSPA1B	761	153	196	135	61	263	440	768	1657	890	547	206	399	82	244	134	1582	1240	141	205	510	2448	1308	363	2362	113	3468	3174	486	2092	77	637	160	85	1337	317	214	279	74	518	101	113	29	405	138	2514	185	226	62
HSPA1A	269	171	173	166	52	138	207	394	722	580	130	64	260	67	284	149	1649	1071	173	323	629	2757	1533	209	1252	78	917	1199	370	1711	54	491	259	143	1137	207	183	108	60	259	81	73	18	117	208	67	270	144	48
HSPA1L	23	2	12	8	6	2	10	34	24	16	13	0	8	4	16	0	10	15	7	14	29	50	22	22	23	4	38	30	0	26	6	32	16	14	48	2	6	2	2	10	7	12	0	6	4	25	38	10	2
LSM2	118	97	126	53	22	70	45	96	76	118	80	4	84	10	111	61	129	116	14	172	162	149	161	104	99	13	116	210	46	43	67	157	180	64	283	53	72	37	30	33	28	81	6	39	54	217	93	82	34
LOC105379656	0	0	0	0	0	0	0	0	0	0	0	0	0	0	0	0	0	0	0	0	0	0	0	0	0	0	0	0	0	0	0	0	0	0	0	0	0	0	0	0	0	0	0	0	0	0	0	0	0
DHFRP2	0	0	0	0	0	2	7	1	0	0	2	0	0	0	4	0	2	0	0	0	9	2	0	0	5	11	0	2	0	0	0	0	0	0	23	0	0	0	0	0	0	0	0	0	0	0	2	0	2
CCHCR1	82	84	90	63	12	332	66	239	321	532	172	6	139	55	95	24	152	201	87	126	289	595	320	83	534	220	889	461	73	531	44	149	170	46	1268	61	100	122	18	32	14	26	25	51	134	388	140	266	4
POLR2LP1	0	0	0	0	0	0	0	2	0	2	0	0	0	0	0	0	0	0	0	0	0	0	0	0	0	0	3	14	0	2	0	0	0	0	2	0	0	0	0	0	0	0	0	0	0	4	0	2	0
PSORS1C2	1	0	0	0	0	32	0	10	154	49	6	0	16	1	0	0	7	46	0	0	2	22	14	2	0	2	178	171	2	214	0	2	0	0	79	0	2	16	0	0	0	0	0	0	2	80	0	24	0
CDSN	9	9	8	4	4	118	0	62	371	289	12	0	0	30	0	5	27	113	4	10	38	31	27	45	14	17	732	613	1	453	2	4	7	2	244	4	10	49	4	5	2	1	1	2	0	402	6	71	0
PSORS1C1	33	17	4	4	4	164	6	91	398	132	22	2	60	30	55	4	26	156	0	141	16	52	38	8	14	4	703	522	36	535	0	35	32	6	226	44	33	21	2	0	4	28	9	8	13	172	71	70	4
C6orf15	0	0	0	0	0	0	2	0	1	0	2	0	0	0	0	0	0	0	0	2	0	0	0	0	0	0	2	0	0	0	0	0	0	4	0	10	0	0	0	0	0	2	0	0	2	0	0	0	0
MUC21	0	0	0	6	0	0	0	12	0	0	2	0	2	0	2	0	2	2	0	2	2	2	0	0	0	19	9	0	0	2	2	0	8	3	0	0	0	0	0	3	1	0	0	0	2	0	4	4	0
NAPGP2	0	0	0	0	0	0	0	0	0	0	0	0	0	0	0	0	2	0	0	0	0	0	0	0	0	0	0	0	0	0	0	0	0	0	0	0	0	0	0	0	0	0	0	0	0	0	0	0	0
HCG21	0	0	0	0	0	0	1	5	14	41	0	0	11	0	8	2	0	18	0	0	0	2	4	0	8	0	29	48	10	69	0	2	4	0	5	0	1	0	0	6	0	2	0	0	1	6	0	0	0
MUCL3	1404	3482	1662	571	430	291	810	11351	8855	4753	64	671	5067	312	4888	2354	361	6120	427	5958	316	3936	1831	1928	4898	365	4613	14243	12918	30349	1200	3293	4752	738	250	269	1386	1098	1877	3172	465	6244	1416	2765	2328	1653	3621	221	1827
SFTA2	10	8	0	5	2	0	0	8	4	10	0	4	14	0	24	0	32	11	0	28	8	6	0	0	10	4	3	9	20	50	2	0	26	2	6	0	2	0	4	0	0	11	4	0	14	18	0	0	0
VARS2	78	67	94	55	12	136	47	224	478	782	130	14	149	54	75	74	112	466	75	73	413	428	402	146	211	92	880	611	77	604	51	92	137	36	1448	84	82	92	36	40	23	60	38	12	52	753	39	139	10
GTF2H4	83	20	73	36	20	48	24	72	143	252	70	6	62	16	15	24	63	112	28	28	179	250	203	44	55	38	298	209	36	208	20	66	73	28	637	39	32	24	16	9	21	30	0	18	61	219	34	53	19
MIR4640	0	0	0	0	0	0	0	0	0	1	0	0	0	0	0	0	1	0	0	0	0	1	0	0	0	0	5	1	0	2	0	0	0	0	9	1	0	2	0	0	0	0	0	0	0	21	0	1	0
DDR1	441	157	218	127	75	1603	181	931	2072	4263	466	16	312	259	470	146	806	3199	140	570	604	1586	695	441	490	441	7541	3255	1085	6524	147	464	933	112	12444	353	354	778	119	111	51	208	161	109	185	4760	325	1001	92
LINC02570	0	0	0	0	0	0	0	0	0	0	0	0	0	0	6	0	0	0	0	1	0	0	0	0	1	11	0	0	2	0	0	0	2	4	2	0	0	0	0	0	0	0	0	0	0	2	4	0	0
RPL7P4	0	0	0	0	0	0	0	2	4	2	0	0	0	0	0	0	2	0	0	0	2	0	0	0	0	0	2	0	0	2	0	0	0	0	0	0	0	0	0	0	0	0	0	0	0	2	0	0	0
NRM	33	16	36	18	12	38	26	36	43	154	26	2	35	12	59	25	41	20	25	41	123	239	222	28	24	18	82	114	14	49	18	42	31	22	212	43	15	10	18	12	11	30	20	14	57	50	7	30	8
PPP1R18	505	216	583	451	210	287	254	350	382	778	316	16	779	122	562	502	457	484	194	783	1329	1796	1200	548	455	229	413	683	415	428	415	790	1197	424	1136	697	692	121	285	148	139	231	92	232	801	103	275	201	119
TRIM26BP	2	0	0	0	0	0	0	4	2	18	2	0	3	2	0	0	0	4	0	0	12	4	6	0	0	29	8	23	0	12	0	0	1	0	6	5	0	0	0	0	0	0	0	0	7	0	0	2	0
MICD	42	25	0	0	2	93	0	54	125	217	2	0	2	14	33	0	10	99	2	59	113	163	45	24	4	14	224	254	0	167	0	5	2	1	65	12	0	5	0	0	0	0	0	1	8	106	1	39	0
HLA-W	4	0	0	8	0	8	2	8	58	89	4	0	0	10	4	0	8	62	5	2	74	95	20	18	6	13	151	80	0	83	2	2	0	0	90	4	0	4	0	0	0	0	0	0	8	45	0	12	0
MICF	0	0	0	0	0	0	0	0	0	4	0	0	0	0	0	8	0	0	0	0	0	4	0	0	0	0	0	0	4	0	0	0	2	2	0	0	0	0	0	0	0	0	0	0	0	0	0	0	0
LOC107987452	0	0	0	0	0	0	0	0	0	0	0	0	0	0	0	0	0	0	0	0	0	0	0	0	0	0	0	0	0	0	0	0	0	0	0	0	0	0	0	0	0	0	0	0	0	0	0	0	0
RPL23AP1	0	0	0	0	0	0	0	0	0	0	0	0	0	0	0	0	0	0	0	0	0	0	0	0	0	0	0	0	0	0	0	0	0	0	0	0	0	0	0	0	0	0	0	0	0	0	0	0	0
HCG4P11	0	2	0	0	0	0	2	0	2	4	0	0	0	0	0	0	2	2	0	2	0	0	0	0	0	8	0	2	0	0	0	2	0	0	0	0	0	0	0	0	0	6	0	0	0	1	0	0	0
OR2H2	0	0	1	0	0	0	2	0	0	14	0	0	0	0	0	6	0	0	0	4	12	61	8	0	12	16	24	4	0	6	0	2	2	0	10	0	0	0	0	0	0	0	0	0	6	0	0	0	0
RPL13AP	0	0	0	0	0	0	0	2	0	0	0	0	0	0	0	0	2	0	0	0	2	0	0	0	0	0	0	0	0	0	0	0	0	0	0	0	0	0	0	0	0	0	0	0	2	0	2	0	0
SNORD32B	0	0	0	0	0	0	0	0	0	0	0	0	0	0	0	0	0	0	0	0	2	0	0	0	0	0	0	0	0	0	0	0	0	0	0	0	0	0	0	0	0	0	0	0	0	0	2	0	0
TMEM183AP1	3	0	0	0	0	0	0	0	0	0	0	0	0	0	0	0	0	0	0	0	0	0	2	0	0	0	0	2	0	0	0	0	0	0	0	0	0	0	0	0	0	0	0	0	0	0	0	0	0
OR2H5P	0	0	0	0	0	0	0	1	0	0	0	0	0	0	0	0	0	0	0	0	0	0	0	0	0	0	0	0	0	0	0	0	0	0	0	0	0	0	0	0	0	0	0	0	0	0	0	0	0
UBD	5	0	0	0	0	0	0	0	0	2	0	0	0	0	0	0	0	0	0	0	0	0	0	0	0	0	0	0	2	5	0	0	4	0	0	0	2	0	0	0	0	0	0	0	0	0	0	0	0
TRV-AAC6-1	0	0	0	0	0	0	0	0	0	0	0	0	0	0	0	0	0	0	0	0	0	0	0	0	0	0	0	0	0	0	0	0	0	0	0	0	0	0	0	0	0	0	0	0	0	0	0	0	0
LOC112268339	0	0	0	0	0	0	0	0	0	0	0	0	0	0	0	0	0	0	0	0	0	0	0	0	0	0	0	0	0	0	0	0	0	0	0	0	0	0	0	0	0	0	0	0	0	0	0	0	0
LOC112268337	0	0	0	0	0	0	0	0	0	0	0	0	0	0	0	0	0	0	0	0	0	0	0	0	0	0	0	0	0	0	0	0	0	0	0	0	0	0	0	0	0	0	0	0	0	0	0	0	0
HLA-DQB1-AS1	0	0	0	0	4	0	4	0	0	0	0	0	0	0	0	0	12	2	0	0	0	0	6	0	0	0	2	0	2	0	0	0	0	0	0	0	0	0	0	0	0	0	0	0	2	0	0	0	0
LOC107987449	0	0	0	0	0	0	0	0	0	0	0	0	0	0	0	0	0	0	0	0	0	0	0	0	0	0	0	0	0	0	0	0	0	0	0	0	0	0	0	0	0	0	0	0	0	0	0	0	0
FKBPL	16	0	18	8	4	2	0	31	29	36	18	0	9	10	12	2	8	14	6	14	29	35	14	15	6	4	41	45	13	32	6	16	14	22	89	10	8	6	4	0	0	9	8	2	4	41	20	16	0
ATF6B	458	189	159	128	86	467	179	547	1040	2161	256	16	352	168	280	125	367	1023	189	447	1174	2174	1016	280	591	232	3478	1544	298	1942	145	261	559	170	6231	259	221	228	87	68	71	127	42	60	379	1175	263	472	71
LOC110384692	0	0	0	0	0	0	0	0	0	0	0	0	0	0	0	0	0	0	0	0	0	0	0	0	0	0	0	0	0	0	0	0	0	0	0	0	0	0	0	0	0	0	0	0	0	0	0	0	0
LOC112267902	0	0	0	1	0	0	4	0	0	0	3	0	0	0	0	0	0	0	2	2	14	0	0	0	10	1	0	0	6	6	0	0	0	0	0	0	0	0	0	0	0	0	0	0	0	0	0	0	0
WASF5P	0	0	0	0	0	0	0	0	0	0	0	0	2	0	0	0	0	0	0	0	0	0	0	0	0	0	0	0	0	0	0	0	0	0	0	0	0	0	0	0	0	0	0	0	0	0	0	0	0
LOC107987448	0	0	0	0	0	0	0	0	0	0	0	0	0	0	0	0	0	0	0	0	0	0	0	0	0	0	0	0	0	0	0	0	0	0	0	0	0	0	0	0	0	0	0	0	0	0	0	0	0
HCG4P8	0	0	0	0	0	0	0	0	0	0	0	0	0	2	0	0	0	0	0	6	4	0	0	0	0	17	0	0	0	0	0	2	0	8	2	0	0	0	0	0	0	0	0	0	0	0	0	0	0
LOC107987447	0	0	0	0	0	0	0	0	0	0	0	0	0	0	0	0	0	0	0	0	0	0	0	0	0	0	0	0	0	0	0	0	0	0	0	0	0	0	0	0	0	0	0	0	0	0	0	0	0
HCG9P5	2	0	0	0	0	2	0	4	2	18	6	0	5	0	0	0	0	0	2	0	14	37	5	4	2	2	28	0	4	11	0	0	0	2	12	0	0	0	0	0	0	0	0	0	0	2	0	0	0
LOC112268336	0	0	0	0	0	0	0	0	0	0	0	0	0	0	0	0	0	0	0	0	0	0	0	0	0	0	0	0	0	0	0	0	0	0	0	0	0	0	0	0	0	0	0	0	0	0	0	0	0
LOC100294188	0	0	0	0	0	0	0	0	0	0	0	0	0	0	0	0	0	0	0	0	0	0	0	0	0	0	0	0	0	0	0	0	0	0	0	0	0	0	0	0	0	0	0	0	0	0	0	0	0
LOC112268335	0	0	0	0	0	0	0	0	0	0	0	0	0	0	0	0	0	0	0	0	0	0	0	0	0	0	0	0	0	0	0	0	0	0	0	0	0	0	0	0	0	0	0	0	0	0	0	0	0
HLA-S	0	0	0	0	0	0	0	0	0	0	0	0	0	0	0	0	0	0	0	0	2	0	4	0	0	6	2	0	2	0	0	0	0	0	0	0	0	0	0	0	0	0	0	0	0	1	0	0	0
ZDHHC20P2	0	0	0	0	0	0	0	0	2	0	0	0	0	0	0	8	0	0	0	0	0	0	0	0	1	0	0	0	0	0	0	0	0	0	0	0	0	0	0	0	0	0	0	0	0	0	2	0	0
RN7SKP186	0	1	0	0	0	0	0	0	0	0	0	0	0	0	0	0	0	0	0	0	4	0	0	1	0	1	2	0	0	0	0	0	0	0	0	0	0	0	0	0	0	0	0	0	0	0	0	0	0
TMPOP1	0	0	0	0	0	0	0	0	4	0	0	0	0	0	0	0	0	2	0	2	0	0	0	0	2	0	0	0	0	0	0	0	0	0	0	1	0	0	0	4	0	0	0	0	0	0	0	0	0
LOC107987443	0	0	0	0	0	0	0	0	0	0	0	0	0	0	0	0	0	0	0	0	0	0	0	0	0	0	0	0	0	0	0	0	0	0	0	0	0	0	0	0	0	0	0	0	0	0	0	0	0
TCF20	621	325	393	239	127	890	178	691	1553	2057	500	20	563	184	308	243	578	1518	207	506	1263	1845	988	553	719	311	3778	2783	424	2671	215	664	646	199	1552	621	403	276	133	136	155	206	95	222	375	1935	449	653	81
CYP2D8P	2	0	2	2	0	20	6	11	53	46	6	0	12	4	0	0	18	32	4	20	34	69	29	6	24	31	185	83	2	43	0	9	5	2	48	6	6	12	4	4	0	4	0	0	0	48	2	36	0
CYP2D7	20	22	2	4	2	78	8	102	83	115	19	0	4	3	14	2	22	101	26	6	63	119	26	9	74	44	233	125	6	108	2	12	17	8	63	3	18	23	0	6	0	2	0	4	13	103	23	38	0
LOC112268333	0	0	0	0	0	0	0	0	0	0	0	0	0	0	0	0	0	0	0	0	0	0	0	0	0	0	0	0	0	0	0	0	0	0	0	0	0	0	0	0	0	0	0	0	0	0	0	0	0
LOC102723722	0	0	2	0	0	0	0	0	2	7	0	0	0	0	0	0	0	0	0	0	0	0	0	0	0	0	6	0	0	0	1	0	0	0	0	0	0	0	0	0	0	0	0	0	0	2	0	0	0
CYP2D6	30	10	26	0	4	396	6	509	163	230	76	2	7	62	8	4	21	490	7	26	121	531	146	94	45	14	601	288	2	640	0	12	29	11	268	14	19	24	0	6	0	0	4	2	46	156	13	236	0
LOC105373047	6	0	0	0	0	50	0	4	6	10	0	0	0	4	0	0	0	4	0	0	6	4	3	9	0	0	11	16	0	40	0	0	0	0	2	0	0	0	0	1	0	0	0	0	0	3	0	35	0
OLA1P1	179	73	63	56	21	149	27	58	95	163	105	5	103	35	68	76	97	137	42	139	100	59	119	88	49	0	236	190	123	104	28	111	87	39	217	87	59	52	31	34	23	39	27	63	41	233	93	137	12
NDUFA6-DT	6	4	6	6	0	20	6	19	27	58	24	0	0	9	15	8	9	48	2	9	61	125	54	2	48	25	104	50	2	72	2	26	31	6	58	11	10	6	6	6	0	3	0	4	9	47	2	16	1
NDUFA6	183	158	289	115	49	325	46	149	265	329	150	22	163	46	172	138	183	355	93	232	206	197	219	312	128	16	674	477	130	305	106	161	190	108	162	182	101	100	88	96	113	188	43	119	106	626	143	181	36
SMDT1	184	141	201	108	50	130	65	166	223	205	114	6	133	55	136	135	81	178	85	288	314	244	355	245	133	70	345	361	142	232	157	304	187	107	153	201	128	101	77	79	65	134	55	114	155	262	97	134	31
PHETA2	54	57	60	20	16	70	14	77	78	178	71	6	135	6	68	60	36	118	23	76	115	154	187	94	50	48	152	155	55	211	42	64	84	30	82	78	38	36	20	37	31	68	20	30	28	259	57	45	14
LOC112268334	0	0	0	0	0	0	0	0	0	0	0	0	0	0	0	0	0	0	0	0	0	0	0	0	0	0	0	0	0	0	0	0	0	0	0	0	0	0	0	0	0	0	0	0	0	0	0	0	0
MUC2	753	0	2646	18	6	2265	6	1023	28879	29268	3348	0	1772	353	4	200	694	6007	0	582	17	18	10	938	7	720	27097	42430	922	1609	40	10	5027	70	68537	13104	5932	2644	2	91	366	23	79	219	6	3927	16	1935	30
LOC107987157	0	0	0	0	0	0	0	2	98	18	0	0	0	0	0	0	1	22	0	0	0	2	0	0	0	0	57	141	0	2	0	0	0	0	27	0	3	0	0	0	0	0	0	0	0	18	6	0	0
LINC02688	18	26	16	0	0	6	8	36	259	111	20	0	8	4	91	69	133	66	1	38	16	25	10	14	19	2	167	474	99	2	2	3	98	0	63	38	56	2	8	2	5	12	0	8	6	42	20	10	0
MUC6	1020	5736	3466	830	232	1455	5284	7647	9627	11779	753	637	1047	681	18035	4040	20034	3959	2138	6993	3733	14747	22636	1728	7701	2466	2769	15928	11958	1065	4644	5413	36302	718	4965	2339	3554	1366	3005	4541	549	1557	2604	2453	6346	970	18505	1881	310
AP2A2	552	212	450	206	99	742	171	582	1370	1599	418	22	701	199	330	310	425	1282	240	480	1084	1679	946	535	704	256	2986	2330	309	1326	205	397	515	181	975	574	319	253	130	125	126	205	60	124	401	1085	247	484	48
RNU6-1025P	0	0	0	0	0	5	0	0	2	9	0	0	0	0	0	0	0	2	0	0	0	4	8	0	0	0	17	1	0	3	0	0	0	0	3	0	0	2	0	0	0	0	0	0	0	7	0	0	0
LOC105377779	4	0	0	0	0	0	0	0	1	4	0	1	0	0	0	0	2	4	0	0	4	20	0	2	0	10	3	8	0	0	0	0	0	0	4	6	2	0	0	0	0	0	0	0	2	0	0	0	0
MIR3674	6	0	0	0	0	0	0	0	0	0	0	0	0	0	0	0	0	0	0	0	0	2	6	0	0	0	1	1	0	2	0	0	0	0	0	0	0	0	0	0	0	0	0	0	0	2	8	0	0
CLN8	101	21	60	28	27	93	58	139	287	537	30	8	73	33	106	53	88	202	76	123	425	997	351	104	125	46	778	515	36	755	49	58	83	35	333	48	103	66	27	35	24	40	8	46	46	349	75	74	15
CLN8-AS1	6	14	42	23	8	26	24	60	40	38	51	0	67	10	23	32	37	33	27	101	44	111	99	32	60	14	39	49	42	69	22	38	64	52	32	40	28	10	20	16	26	28	5	11	29	15	47	21	4
LOC100130321	0	0	0	0	0	0	0	0	0	0	0	0	0	0	0	0	0	0	0	0	0	0	0	0	0	0	0	0	0	0	0	0	0	0	0	0	0	0	0	0	0	0	0	0	0	0	0	0	2
LOC105377778	0	4	0	0	0	0	0	0	1	2	0	0	0	3	0	1	0	0	2	0	2	0	0	0	0	0	0	0	0	0	0	2	0	0	0	0	2	0	0	0	0	0	0	0	6	0	0	0	0
DLGAP2	0	9	2	8	0	2	3	6	4	4	4	0	4	2	15	4	2	4	8	3	2	3	4	0	4	26	4	2	0	2	0	4	5	10	6	10	0	0	0	0	0	0	0	0	2	0	12	2	2
DLGAP2-AS1	0	0	0	0	0	0	3	0	0	0	0	0	0	0	0	0	0	0	0	0	0	0	0	0	0	2	0	0	0	0	0	0	0	4	0	0	0	0	0	0	0	0	0	0	0	0	0	0	0
HLA-DPA3	0	0	0	0	0	0	0	0	0	0	0	0	0	0	0	0	0	0	0	0	0	0	0	0	0	0	0	0	0	0	0	0	0	0	0	0	0	0	0	0	0	0	0	0	0	0	0	0	0
LOC112267927	0	0	0	0	0	0	0	0	0	0	0	0	0	0	0	0	0	0	0	0	0	0	0	0	0	0	0	0	0	0	0	0	0	0	0	0	0	0	0	0	0	0	0	0	0	0	0	0	0
LOC100294160	0	0	0	0	0	0	0	0	0	0	0	0	0	0	0	0	0	0	0	0	0	0	0	0	0	0	0	0	0	0	0	0	0	0	0	0	0	0	0	0	0	0	0	0	0	0	0	0	0
LOC107987440	0	0	0	0	0	0	0	0	0	0	0	0	0	0	0	0	0	0	0	0	0	0	0	0	0	0	0	0	0	0	0	0	0	0	0	0	0	0	0	0	0	0	0	0	0	0	0	0	0
LINC01596	0	0	0	0	0	0	0	0	2	11	0	0	0	0	0	0	0	0	4	0	14	5	1	1	0	2	1	8	0	2	0	1	0	0	3	0	0	0	0	0	0	0	0	0	1	0	0	0	0
LOC105377619	0	5	2	0	1	0	16	7	8	17	0	8	9	0	0	0	0	0	4	8	38	23	23	2	59	10	0	25	0	2	2	1	0	0	16	0	1	0	0	4	0	2	0	0	3	0	9	2	0
FRG1-DT	0	7	0	6	0	0	4	2	18	21	6	0	2	0	0	0	2	3	6	10	59	35	23	4	20	0	3	9	11	10	0	0	4	0	19	2	0	2	0	0	0	6	0	4	2	6	5	4	1
RNU1-51P	0	0	0	0	0	0	0	0	0	2	0	0	0	0	0	0	0	0	0	0	0	0	0	0	0	0	0	0	0	1	0	0	0	0	1	0	0	0	0	0	0	0	0	0	0	0	0	0	0
LOC105377616	1	0	0	4	0	0	0	6	3	23	0	0	2	0	2	4	0	2	2	2	66	56	14	10	4	6	4	6	6	2	0	1	2	2	8	12	2	0	0	0	4	0	0	6	4	0	2	0	0
LOC107987311	0	0	0	0	0	0	0	0	0	0	0	0	0	0	0	0	0	0	0	0	0	0	0	0	0	0	0	0	0	0	0	0	0	0	0	0	0	0	0	0	0	0	0	0	0	0	0	0	0
LINC01262	0	0	0	0	0	0	0	0	0	0	0	0	0	0	0	0	0	0	0	0	2	0	2	0	0	2	0	0	0	0	0	0	0	0	2	0	0	0	0	0	0	0	0	0	0	0	0	0	0
LOC105377615	0	0	0	0	0	0	0	1	0	0	0	0	0	0	0	0	0	0	0	0	0	0	0	0	0	2	2	0	0	0	0	0	0	0	0	0	0	0	0	0	0	0	0	0	2	0	0	0	0
HSP90AA4P	0	0	0	0	0	2	2	0	1	2	1	0	1	0	0	10	5	1	0	9	7	0	3	1	4	10	3	2	3	2	0	3	0	1	4	1	0	0	0	0	0	0	0	0	0	1	5	1	0
LOC105377614	0	0	0	0	0	0	0	0	0	0	0	0	0	0	0	0	0	0	0	0	0	0	0	0	0	0	0	0	0	0	0	0	0	0	0	0	0	0	0	0	0	0	0	0	0	0	2	0	0
KRT18P53	0	0	0	0	0	0	0	0	0	0	0	0	0	0	6	0	0	0	0	0	0	0	0	0	0	0	0	0	0	0	0	0	0	0	0	0	0	0	0	0	0	0	0	0	0	0	0	0	0
FABP5P13	0	0	0	0	0	0	0	0	0	0	0	0	0	0	0	0	0	0	0	0	0	0	0	0	0	0	0	0	0	0	0	0	0	0	0	0	0	0	0	0	0	0	0	0	0	0	0	0	0
LOC102723840	0	0	0	0	0	0	0	0	0	0	0	0	0	0	0	0	0	0	0	0	0	0	0	0	0	0	0	0	0	0	0	0	0	0	0	0	0	0	0	0	0	0	0	0	0	0	0	0	0
PPP2R3B	65	17	42	16	12	14	49	107	146	218	37	4	49	20	36	14	79	53	36	36	239	428	258	34	200	154	223	296	61	272	20	52	70	16	531	28	33	35	16	19	14	12	0	20	57	137	63	31	4
LOC101929829	0	0	0	0	0	0	0	0	0	0	0	0	0	0	0	0	0	0	0	0	0	0	0	0	0	0	0	0	0	0	0	0	0	0	0	0	0	0	0	0	0	0	0	0	0	0	0	0	0
LOC107987438	0	0	0	0	0	0	0	0	0	0	0	0	0	0	0	0	0	0	0	0	0	0	0	0	0	0	0	0	0	0	0	0	0	0	0	0	0	0	0	0	0	0	0	0	0	0	0	0	0
LOC107987441	0	0	0	0	0	0	0	0	0	0	0	0	0	0	0	0	0	0	0	0	0	0	0	0	0	0	0	0	0	0	0	0	0	0	0	0	0	0	0	0	0	0	0	0	0	0	0	0	0
LOC105372225	0	0	0	0	0	0	0	0	0	0	2	0	0	0	0	0	0	2	0	0	2	0	0	0	0	0	0	0	0	0	0	2	0	0	0	0	0	0	0	0	0	0	0	0	0	0	6	0	0
SALL3	0	0	0	0	0	0	4	0	0	0	2	0	6	0	6	0	0	0	0	6	2	0	0	0	2	0	0	0	0	0	0	0	0	10	0	16	4	0	0	0	0	0	0	0	2	0	0	0	4
LINC01896	8	3	0	2	0	0	0	0	0	0	2	0	0	0	0	0	0	4	0	19	2	0	0	0	0	9	1	0	10	0	0	0	2	0	0	0	0	0	0	0	0	0	0	0	0	0	0	0	0
LOC105372221	0	0	0	0	0	0	0	0	0	0	0	0	0	0	0	0	0	0	0	0	0	0	0	0	0	0	0	0	0	0	0	2	0	1	0	2	0	0	0	0	0	0	0	0	0	0	0	0	2
LOC105372220	0	4	0	0	0	0	0	0	0	0	0	0	4	0	0	0	0	0	0	0	1	0	0	0	0	4	0	0	0	2	0	0	0	0	0	0	0	0	0	0	0	0	0	0	3	0	0	0	0
LOC105372219	0	0	0	0	0	0	4	1	0	0	0	0	0	0	0	0	4	0	0	0	0	0	0	0	0	0	0	0	0	2	0	0	2	4	0	0	0	0	0	0	0	0	0	0	0	0	0	0	0
WNT9B	5	0	2	2	0	10	2	2	4	8	0	0	0	0	8	0	4	4	0	14	13	10	2	0	6	26	9	11	6	0	0	2	0	0	4	3	2	2	0	2	0	1	0	0	2	2	12	8	0
LOC101929777	0	0	0	0	0	0	0	1	0	0	2	0	0	0	0	0	0	0	0	0	2	0	0	0	0	0	0	4	0	0	0	0	0	2	0	0	0	0	0	0	0	0	0	0	0	0	0	0	1
WNT3	4	6	22	0	2	38	4	40	46	53	13	0	10	10	6	8	8	45	0	8	35	27	21	18	5	6	154	87	7	29	4	18	12	2	41	14	5	12	0	4	2	0	0	2	3	31	0	32	0
RPS7P11	886	644	667	487	237	1090	301	502	723	834	960	14	1214	262	1506	772	887	742	190	1217	1084	881	1014	452	797	183	1164	1383	729	440	408	1265	902	444	849	1032	658	128	262	174	177	212	80	408	516	650	689	789	135
LOC107985026	0	0	0	0	0	0	0	3	7	7	0	0	0	0	0	0	4	9	1	2	1	41	8	2	0	0	11	8	0	22	0	0	2	0	14	2	0	0	0	0	0	2	0	0	4	21	0	4	0
NSF	249	180	294	239	71	356	89	352	475	684	270	25	416	75	292	217	260	532	63	436	414	362	468	305	220	61	1038	983	327	699	131	359	371	197	832	494	280	135	93	69	84	145	48	169	206	753	270	268	49
FAM215B	0	0	0	0	0	0	0	2	9	5	0	0	6	0	0	0	2	5	2	0	13	0	4	2	0	0	32	3	0	12	0	0	0	0	15	1	0	0	0	0	0	0	0	0	0	13	0	0	0
RN7SL199P	0	0	0	0	0	0	0	0	0	0	0	0	0	0	0	0	2	1	0	0	0	0	0	0	1	0	0	0	0	2	0	0	3	0	0	0	1	0	0	0	0	0	0	0	0	0	0	0	0
LRRC37A2	70	67	25	58	17	56	65	169	252	235	37	6	142	8	65	30	36	285	43	71	407	180	228	74	66	22	1395	440	44	834	20	65	46	39	340	48	46	59	2	9	36	26	5	32	44	296	84	49	3
ARL17A	37	39	12	16	6	4	31	39	104	133	5	0	24	2	11	9	27	107	28	16	299	133	125	44	28	3	410	168	11	341	5	24	14	32	216	17	10	9	0	4	3	9	2	5	45	190	10	7	0
RDM1P2	4	0	4	0	10	8	0	4	23	30	0	0	9	0	0	0	4	25	0	0	70	32	17	2	9	4	66	29	0	71	0	0	2	0	48	0	2	2	0	0	0	0	0	0	10	66	0	4	0
LOC100132570	0	0	0	1	2	0	2	2	7	2	0	0	0	0	0	0	0	2	0	0	4	2	4	4	0	0	8	9	0	4	0	0	0	0	2	4	0	0	0	0	0	0	0	0	0	4	0	0	3
DND1P2	0	0	0	0	0	0	0	0	14	2	0	0	0	0	0	0	0	0	0	0	0	0	3	0	0	0	4	10	0	0	0	0	0	0	0	0	0	0	0	0	6	0	2	0	0	0	0	0	0
MAPK8IP1P1	0	0	0	0	0	0	0	0	5	3	1	0	1	0	0	0	0	10	0	1	2	0	2	0	2	0	5	20	0	2	0	0	0	0	0	0	0	0	0	0	1	0	0	0	0	0	8	0	0
KANSL1-AS1	4	0	14	4	8	10	4	14	27	30	6	2	12	11	10	6	16	22	8	9	18	22	16	12	12	0	36	70	20	45	2	6	6	4	5	8	8	4	6	2	4	4	4	16	5	26	4	6	4
LOC107985027	36	0	8	10	0	53	3	32	272	405	0	0	11	33	16	0	27	132	17	5	217	219	124	43	10	6	529	504	0	688	2	0	8	0	303	6	4	35	2	0	0	16	0	3	36	367	0	70	0
KANSL1	467	295	468	260	139	962	250	848	2046	3256	553	22	594	308	396	261	438	1500	289	680	1975	3294	1683	586	769	450	5864	3470	380	3963	239	638	688	191	1943	480	368	354	108	185	162	222	95	232	402	1773	448	640	86
STH	0	0	0	0	0	0	0	0	0	0	0	0	2	0	1	0	0	0	2	0	2	0	2	0	0	0	0	0	8	0	0	0	0	0	0	0	0	0	0	0	0	0	0	0	0	0	0	0	0
LOC105371800	0	0	2	0	2	0	0	2	2	12	4	0	0	0	2	6	0	0	0	8	6	14	16	2	2	10	0	2	0	0	0	8	0	10	2	0	0	0	0	0	0	0	0	0	2	0	2	2	0
MAPT-IT1	0	0	0	0	0	0	0	0	0	0	2	0	2	0	3	0	0	4	0	12	2	14	0	2	0	0	0	0	14	3	0	0	2	4	0	0	0	0	0	0	0	0	0	0	0	0	4	0	0
MAPT	14	10	12	8	5	6	3	16	39	74	6	0	16	18	4	2	4	10	10	10	77	70	90	49	28	21	69	96	4	45	3	28	9	4	22	6	8	3	2	14	3	0	4	10	12	27	12	17	0
SPPL2C	0	0	0	0	0	0	0	0	0	0	0	0	2	0	0	0	0	4	0	0	0	0	0	0	0	0	0	0	22	0	0	0	0	4	0	0	0	0	0	0	0	0	0	0	0	0	4	0	0
MAPT-AS1	0	0	0	0	0	0	0	0	0	0	0	0	0	0	0	0	0	0	0	4	2	0	0	0	0	0	0	0	0	0	0	0	0	2	0	0	0	0	0	0	0	0	0	0	0	0	0	0	0
CRHR1	0	0	0	0	0	0	8	2	0	0	0	0	0	0	0	0	0	0	0	0	0	0	0	0	0	6	0	0	0	0	0	0	0	4	0	0	0	0	0	0	0	0	0	0	0	0	0	0	0
LOC107985028	0	0	0	0	0	0	0	0	0	0	0	0	0	0	0	0	0	0	0	0	0	0	0	0	0	0	0	0	0	0	0	0	0	0	0	0	0	0	0	0	0	0	0	0	0	0	0	0	0
LOC105371802	0	0	0	0	0	0	0	0	0	0	0	0	0	0	2	0	0	0	0	0	0	0	0	0	0	0	0	0	0	0	0	0	0	0	0	0	0	0	0	0	0	0	0	0	0	0	0	0	0
ARF2P	0	2	15	4	1	0	4	4	26	68	2	0	4	11	4	2	4	15	3	10	52	69	23	19	7	0	65	61	10	48	2	0	18	0	95	4	8	0	0	0	0	2	0	7	5	76	0	11	0
LINC02210-CRHR1	0	0	0	0	0	0	0	0	0	0	0	0	0	0	0	0	0	0	0	0	0	0	0	0	0	0	0	0	0	0	0	0	0	0	0	0	0	0	0	0	0	0	0	0	2	0	0	0	0
LINC02210	10	5	7	0	2	4	5	16	18	48	4	0	10	0	10	0	5	10	12	2	69	87	22	28	14	17	61	27	5	58	2	24	4	12	87	4	8	4	0	2	0	6	0	8	3	47	0	3	0
RPS26P8	6	0	0	0	0	0	0	1	1	0	0	0	10	4	4	4	1	2	0	17	0	0	4	0	0	0	4	0	2	2	0	0	2	0	4	0	0	0	2	0	0	0	0	0	2	6	0	0	0
MAPK8IP1P2	0	0	3	0	0	4	0	5	18	8	0	0	1	0	3	4	1	7	2	17	0	8	7	0	9	0	45	17	19	0	2	8	1	2	2	7	0	0	2	0	0	0	0	0	2	3	15	4	0
LOC105376839	1	0	0	2	0	0	0	0	0	2	0	0	0	2	0	0	1	0	0	12	8	0	0	1	0	0	2	0	0	2	0	0	0	0	8	0	0	0	0	0	0	0	0	0	6	2	0	0	0
DND1P1	18	0	2	6	2	0	4	8	8	21	7	2	0	8	0	6	20	8	8	8	43	60	10	11	3	6	23	28	0	12	0	8	22	4	22	4	8	2	0	0	0	2	0	0	12	19	8	4	0
RDM1P1	0	0	0	0	0	12	0	0	6	16	0	0	0	0	0	0	4	2	1	0	18	2	5	4	0	0	30	13	0	12	0	0	2	0	9	0	0	0	0	2	0	0	0	0	2	14	0	0	0
LOC102724345	22	7	4	0	6	0	2	16	32	129	2	0	9	2	0	3	18	19	22	28	173	186	81	12	9	2	111	54	0	136	0	5	11	0	140	0	8	9	0	0	0	2	0	0	27	57	2	8	3
LRRC37A4P	57	63	70	39	32	30	34	61	65	197	61	2	74	20	68	49	54	39	57	78	393	570	173	105	64	23	115	107	64	219	48	59	121	28	406	38	36	24	25	12	21	23	8	35	105	198	50	49	23
LOC112267925	0	0	0	0	0	0	0	0	0	0	0	0	0	0	0	0	0	0	0	0	0	0	0	0	0	0	0	0	0	0	0	0	0	0	0	0	0	0	0	0	0	0	0	0	0	0	0	0	0
LRRC37A3	38	16	21	13	8	15	31	39	149	197	22	0	28	13	35	20	14	45	25	78	141	271	173	28	35	16	181	201	22	198	6	32	65	9	245	52	28	14	0	10	2	8	0	10	28	47	29	60	1
LOC105369225	8	0	6	0	0	0	0	0	7	8	2	0	0	0	8	0	2	2	1	0	28	46	9	0	0	0	13	10	0	15	0	0	4	0	16	0	0	0	0	0	0	0	0	0	2	5	0	4	0
MIR4315-1	0	0	0	0	0	0	0	0	0	0	0	0	0	0	0	0	0	0	0	0	0	0	0	0	0	0	0	0	0	0	0	0	0	0	0	0	0	0	0	0	0	0	0	0	0	0	0	0	0
PLEKHM1	289	103	301	122	64	399	104	320	1406	1532	247	16	410	220	269	163	217	1150	101	478	748	1214	693	237	352	149	2818	2405	289	1612	161	396	379	165	935	485	263	253	78	85	102	126	57	111	233	1052	260	320	48
ARHGAP27	272	103	224	132	66	1486	108	957	3185	4123	593	6	444	464	148	142	519	3251	116	292	844	1218	812	667	283	283	13996	6120	114	6012	180	204	451	151	2814	516	305	881	104	79	78	151	16	64	219	2895	150	971	34
LOC105371796	0	0	0	0	0	0	0	2	0	0	0	0	2	0	0	2	0	0	0	0	2	0	0	0	0	10	0	4	0	0	0	0	0	0	0	0	0	0	0	0	0	0	0	0	1	0	0	0	0
RNA5SP443	0	0	0	0	0	0	0	0	0	0	0	0	0	0	0	0	0	0	0	0	0	0	1	0	0	0	0	0	0	0	0	0	0	0	0	0	0	0	0	0	0	0	0	0	0	0	0	0	0
KRTAP9-12P	0	0	0	0	0	0	0	0	0	0	0	0	0	0	0	0	0	0	0	0	0	0	0	0	0	0	0	0	0	0	0	0	0	0	0	0	0	0	0	0	0	0	0	0	2	0	0	0	0
KRTAP9-2	0	0	0	0	0	0	0	0	0	0	0	0	0	0	0	0	0	0	0	0	0	0	0	0	0	0	0	0	0	0	0	0	0	0	0	0	0	0	0	0	0	0	0	0	0	0	0	0	0
KRTAP9-4	0	0	0	0	0	0	0	0	0	0	0	0	0	0	4	0	0	0	0	0	0	0	0	0	0	0	0	0	4	0	0	0	2	0	0	0	0	0	0	0	0	0	0	0	0	0	0	0	0
KRTAP9-9	0	0	0	0	0	0	0	0	0	0	0	0	0	0	0	0	0	0	0	0	0	0	0	0	0	0	0	0	0	0	0	0	0	0	0	0	0	0	0	0	0	0	0	0	0	0	0	0	0
KRTAP9-6	0	0	0	0	0	0	0	0	0	0	0	0	0	0	0	0	1	0	0	0	0	0	0	0	0	0	0	0	0	0	0	0	0	0	0	0	0	0	0	0	0	0	0	0	0	0	0	0	0
KRTAP9-11P	0	0	0	0	0	0	0	0	0	0	0	0	0	0	0	0	0	0	0	8	0	0	0	0	0	0	0	0	0	0	0	0	0	0	0	0	0	0	0	0	0	0	0	0	0	0	0	0	0
KRTAP9-7	0	0	0	0	0	0	0	0	0	0	0	0	0	2	0	0	1	0	2	0	0	0	0	0	0	0	0	0	0	0	0	0	0	0	0	0	0	0	0	0	0	0	0	0	0	0	0	0	0
KRTAP9-10P	0	0	0	2	0	0	0	0	0	0	0	0	0	0	0	0	0	0	0	0	0	0	0	0	0	0	0	0	0	0	0	0	0	0	0	0	0	0	0	0	0	0	0	0	0	0	0	0	0
KRTAP29-1	6	0	0	0	0	0	0	0	0	0	0	0	0	0	0	0	0	0	0	0	0	0	0	0	0	0	0	0	0	0	0	4	1	0	0	0	0	0	0	0	0	0	0	0	0	0	0	0	0
LOC102724956	0	0	0	0	0	0	0	0	0	0	0	0	0	0	0	0	0	0	0	0	0	2	0	0	0	0	0	0	0	2	0	0	0	0	0	0	0	0	0	0	0	0	0	0	0	0	0	2	0
TBC1D3I	0	0	0	0	0	0	2	0	0	4	0	0	4	0	0	4	4	0	0	0	5	4	0	0	0	0	11	13	0	12	2	0	4	3	2	4	0	0	0	0	0	0	0	0	0	7	0	0	0
LOC105371747	0	0	0	0	0	0	0	0	1	0	0	0	1	0	0	0	0	0	0	0	0	0	0	0	0	0	0	0	0	2	0	0	0	0	2	0	0	0	0	0	0	0	0	0	0	0	0	0	0
CCL4L1	0	0	0	0	0	0	0	0	0	0	0	0	0	0	0	0	0	0	0	0	0	0	0	0	0	0	0	0	0	0	0	0	0	0	0	0	0	0	0	0	0	0	0	0	0	0	0	0	0
CCL3L1	0	0	0	0	0	0	0	0	0	0	0	0	0	0	0	0	0	0	0	0	0	0	0	0	0	0	0	0	0	0	0	0	0	0	0	0	0	0	0	0	0	0	0	0	0	0	0	0	0
LOC107987437	0	0	0	0	0	0	0	0	0	0	0	0	0	0	0	0	0	0	0	0	0	0	0	0	0	0	0	0	0	0	0	0	0	0	0	0	0	0	0	0	0	0	0	0	0	0	0	0	0
LOC105379634	0	0	0	0	0	0	0	0	0	0	0	0	0	0	0	0	0	0	0	0	0	0	0	0	0	0	0	0	0	0	0	0	0	0	0	0	0	0	0	0	0	0	0	0	0	0	0	0	0
CCL3P1	0	0	0	0	0	0	0	0	0	0	0	0	0	0	0	0	0	0	0	0	0	0	0	0	0	0	0	0	0	0	0	0	0	0	0	0	0	0	0	0	0	0	0	0	0	0	0	0	0
TBC1D3G	2	14	0	0	0	10	0	12	2	69	0	0	0	0	0	0	0	4	0	0	3	0	4	2	0	0	24	30	5	49	0	0	0	0	4	6	0	2	0	0	0	0	0	2	0	10	2	2	0
LOC100420853	0	0	0	0	0	0	0	1	0	0	0	0	0	0	0	0	0	0	0	0	0	0	0	0	0	0	2	2	0	0	0	0	4	0	0	0	0	0	0	0	0	0	0	0	0	0	0	0	0
YWHAEP6	0	0	0	0	0	0	0	0	0	0	0	0	0	0	0	0	0	0	0	0	2	0	0	0	0	0	0	0	0	0	0	0	0	0	0	0	0	0	0	0	0	0	0	0	0	0	0	0	0
LOC105379635	0	0	0	0	0	0	0	0	0	0	0	0	0	0	0	0	0	0	0	0	0	0	0	0	0	0	0	0	0	0	0	0	0	0	0	0	0	0	0	0	0	0	0	0	0	0	0	0	0
CCL4L2	0	0	0	0	0	0	0	0	0	0	0	0	0	0	0	0	0	0	0	0	0	0	0	0	0	0	0	0	0	0	0	0	0	0	0	0	0	0	0	0	0	0	0	0	0	0	0	0	0
CCL3L3	0	0	0	0	0	0	0	0	0	0	0	0	0	0	0	0	0	0	0	0	0	0	0	0	0	0	0	0	0	0	0	0	0	0	0	0	0	0	0	0	0	0	0	0	0	0	0	0	0
TBC1D3B	0	0	0	0	0	0	0	0	0	0	0	0	0	0	0	0	0	0	0	0	0	0	0	0	0	0	0	0	0	0	0	0	0	0	0	0	0	0	0	0	0	0	0	0	0	0	0	0	0
LOC100420851	18	19	96	25	4	17	11	67	32	174	15	0	35	15	18	34	40	105	26	75	241	110	65	84	29	69	217	86	30	640	51	79	34	19	117	70	138	2	6	14	0	17	0	30	43	92	71	20	23
LOC107985056	0	0	0	0	0	0	0	0	0	8	2	0	0	0	0	0	0	0	0	0	0	0	0	0	0	0	0	0	0	0	0	2	0	0	0	0	0	0	0	0	0	0	0	0	0	0	0	0	0
LOC100419980	0	0	0	0	0	0	0	0	2	0	0	0	0	0	0	0	0	1	0	0	2	2	0	0	0	0	16	14	0	4	0	0	0	0	0	0	2	0	0	0	0	0	0	0	0	6	0	0	0
LOC107985055	0	0	0	0	0	0	0	0	2	0	0	0	0	0	0	0	0	0	0	0	2	0	0	0	0	0	2	0	0	0	0	0	0	0	0	0	0	0	0	0	0	0	0	0	0	0	0	0	0
RN7SL301P	2	0	0	0	0	0	0	0	0	0	0	0	0	2	0	0	1	2	0	0	2	0	0	0	1	0	2	1	0	4	1	0	2	0	5	1	0	0	0	0	0	0	0	0	0	0	0	0	0
CCL4	37	0	21	26	2	6	0	14	10	56	18	0	17	2	26	44	22	25	5	38	30	71	42	22	0	0	32	12	33	9	38	52	53	30	33	12	58	4	17	7	0	7	10	17	30	2	22	4	9
LOC101927369	0	1	0	0	2	0	0	0	8	8	1	0	0	0	2	0	0	5	0	18	10	4	6	0	0	2	8	14	0	24	0	4	0	2	2	6	2	0	0	0	0	0	0	0	0	9	0	0	0
CCL3	38	10	6	7	6	6	0	14	0	73	12	0	20	0	0	30	23	28	2	46	7	111	18	10	2	0	22	2	14	3	7	24	25	16	27	11	72	0	16	4	4	8	2	0	10	0	18	2	1
CCL3-AS1	0	0	1	0	0	0	0	4	8	12	2	0	0	0	2	0	0	3	2	4	11	5	0	2	0	0	3	4	2	13	0	0	8	2	4	8	4	0	2	0	0	4	2	4	0	0	0	0	6
CCL18	89	24	28	35	18	112	0	47	103	164	9	2	0	4	136	143	19	298	0	44	100	17	8	100	18	0	10	157	139	71	226	0	213	47	70	138	155	8	182	14	0	44	246	2	219	4	8	87	82
LOC105379599	2	1	6	0	0	10	5	23	98	132	2	0	0	2	0	0	12	35	2	2	41	78	46	26	4	4	234	147	10	108	0	10	8	0	49	0	6	5	0	0	0	0	0	0	4	216	4	14	0
MIR3183	0	0	0	0	0	6	0	0	10	19	0	0	0	2	0	0	0	0	0	0	17	18	3	3	0	0	19	30	0	15	0	0	0	0	8	3	0	1	0	0	0	0	0	0	0	20	0	0	0
LOC105371481	20	0	2	0	0	8	3	3	26	74	0	0	0	0	0	0	0	11	2	0	24	36	23	2	0	28	75	25	1	54	0	0	4	0	18	0	0	1	0	0	0	0	0	0	0	79	0	7	0
LOC112268190	17	2	0	1	0	16	0	26	89	151	2	0	3	14	0	6	15	35	15	25	64	136	67	19	4	15	177	98	2	125	4	2	4	4	66	0	8	14	0	0	0	0	0	0	14	134	10	21	0
ABR	1233	585	896	443	226	2800	534	1906	4984	6503	2345	46	1782	605	836	518	1482	2861	427	1694	1810	3917	2764	1369	1536	737	14939	8317	910	6068	349	1244	1461	495	4183	1330	1456	1503	252	231	318	397	124	338	778	7301	746	2507	168
TIMM22	65	77	72	68	18	107	60	151	289	401	54	6	134	32	115	44	108	221	30	201	300	354	284	91	163	30	491	486	106	245	35	129	108	42	181	128	72	34	28	24	21	47	12	34	70	242	84	68	20
NXN	99	64	138	38	32	54	89	113	146	378	67	4	124	18	156	58	110	92	138	255	490	894	538	210	147	74	144	258	106	264	45	154	151	32	191	187	94	20	23	28	59	43	17	22	60	17	71	64	6
RPH3AL-AS1	0	15	20	17	2	0	0	9	44	33	6	0	6	0	12	13	2	24	5	14	18	62	16	6	20	0	67	70	6	14	2	8	7	0	1	14	13	8	10	8	2	2	1	3	0	26	3	4	0
RPH3AL	60	83	81	52	14	190	69	301	533	585	148	22	199	61	126	48	106	505	52	175	215	553	329	121	299	139	1259	714	186	533	37	168	115	24	249	139	104	92	24	65	27	84	20	37	69	355	193	124	14
LOC107984761	0	0	0	0	0	0	0	0	0	0	0	0	0	0	0	0	0	0	0	0	0	0	0	0	0	0	0	0	0	0	0	0	0	0	0	0	0	0	0	0	0	0	0	0	0	0	0	0	0
LOC107984089	2	0	0	0	0	6	4	6	32	101	2	0	0	0	0	0	13	14	9	0	39	14	4	62	6	0	91	82	0	184	0	0	0	0	62	0	4	2	0	0	0	0	0	0	2	104	0	5	0
FMN1	595	846	495	406	149	626	325	1698	1683	1958	376	52	1620	182	912	492	295	926	245	1410	484	872	1112	714	1354	219	2808	3031	1889	3093	186	2015	446	304	1175	791	427	387	167	242	197	544	215	706	344	1421	1227	552	194
GREM1-AS1	0	0	0	0	0	0	0	0	6	0	0	0	0	0	0	0	10	1	9	0	12	15	2	15	0	0	2	11	0	0	0	0	0	0	0	0	0	0	0	0	0	0	0	0	1	6	0	0	0
GREM1	95	12	244	8	83	111	34	87	75	20	50	0	10	5	175	114	1584	46	1424	26	2101	388	515	2370	30	19	6	105	18	4	31	69	1003	96	227	386	45	101	21	44	24	29	0	30	8	15	27	38	4
LOC105370756	4	0	0	0	0	0	0	0	4	2	0	0	1	0	0	0	2	0	0	0	4	6	0	0	0	0	12	6	0	0	0	3	0	0	10	0	0	2	0	0	0	0	0	0	2	2	0	0	0
SCG5-AS1	0	0	0	0	0	0	1	0	0	0	1	0	0	0	0	0	0	0	0	0	0	2	0	0	0	0	2	0	0	0	0	0	0	0	2	0	0	0	0	0	0	0	0	0	0	0	0	0	0
LOC105379633	0	0	0	0	0	0	0	0	0	0	0	0	0	0	0	0	0	0	0	0	0	0	0	0	0	0	0	0	0	0	0	0	0	0	0	0	0	0	0	0	0	0	0	0	0	0	0	0	0
SCG5	0	0	0	0	0	0	0	0	2	4	0	0	0	0	0	0	0	0	0	0	2	0	0	0	0	0	0	2	0	2	0	0	0	0	1	0	0	0	0	0	0	0	0	0	0	2	0	0	0
ARHGAP11A-SCG5	0	0	3	0	0	0	0	4	0	0	0	0	0	0	0	0	0	0	0	0	0	0	0	0	0	0	0	0	0	0	0	0	0	0	0	0	0	0	0	0	0	0	0	0	0	0	0	0	0
ARHGAP11A	116	60	58	26	20	95	10	67	196	106	74	8	88	10	89	129	159	45	6	97	85	52	125	68	52	7	179	401	52	49	58	97	70	47	236	34	56	26	20	20	38	63	6	44	35	364	34	91	4
RN7SL286P	0	0	0	0	0	0	0	0	0	0	0	0	0	0	0	0	0	0	0	0	0	0	0	0	0	0	0	0	0	0	0	0	0	0	2	0	1	2	0	0	0	0	0	0	0	0	0	0	0
GOLGA8N	15	2	22	12	8	24	22	12	41	54	23	2	4	6	14	8	24	15	25	29	69	177	93	8	38	2	101	44	2	153	4	16	23	3	93	11	8	26	0	2	13	8	0	0	14	19	10	25	0
LOC101928042	6	0	6	1	0	8	0	0	0	24	0	0	2	0	0	0	0	6	0	4	7	22	15	6	0	0	8	0	0	16	0	0	0	0	18	1	0	0	2	0	1	0	0	8	6	21	0	7	0
LINC02256	0	0	8	2	2	1	8	2	10	63	8	0	12	2	8	0	4	4	6	8	44	92	47	4	7	12	92	30	20	67	0	6	5	2	61	2	1	10	0	4	0	6	2	2	8	15	8	8	0
WHAMMP1	49	50	46	30	16	46	35	53	67	111	28	6	53	18	24	47	36	38	33	51	177	150	109	49	79	28	85	98	35	126	24	85	109	22	112	45	37	13	12	47	13	26	12	62	31	36	57	49	10
LOC107984723	0	0	0	0	0	0	0	0	0	0	0	0	0	0	0	0	0	0	0	0	0	0	0	0	0	0	0	0	0	0	0	0	0	0	0	0	0	0	0	0	0	0	0	0	0	0	0	0	0
LOC101060588	0	0	0	0	0	0	0	0	0	0	0	0	0	0	0	0	0	2	0	0	0	0	0	0	0	0	0	0	0	0	0	0	0	0	0	0	0	0	0	0	0	0	0	0	0	0	0	0	0
RNU6-18P	0	0	0	0	0	0	0	0	0	0	0	0	0	0	0	0	0	0	0	0	0	0	1	0	0	0	0	0	0	0	0	0	0	0	0	0	0	0	0	0	0	0	0	0	0	0	0	0	0
LOC107984069	0	0	0	0	0	0	0	0	0	0	0	0	0	0	0	0	0	0	0	0	0	0	0	0	0	0	0	0	0	0	0	0	0	0	0	0	0	0	0	0	0	0	0	0	0	0	0	0	0
LOC105370754	0	0	0	0	0	0	0	0	2	0	0	0	0	0	0	0	0	0	0	0	0	0	0	0	0	0	0	2	0	4	0	0	0	0	5	0	0	0	0	0	0	0	0	0	0	0	0	1	0
CHRNA7	33	26	39	8	6	204	10	158	59	117	52	0	62	10	12	2	7	37	15	65	43	34	47	82	45	46	326	171	52	338	2	86	32	8	328	54	16	19	17	6	10	24	10	24	0	81	70	137	6
DEPDC1P1	3	1	2	0	2	0	0	4	11	10	0	0	4	0	2	2	4	10	2	0	16	37	29	4	16	2	33	34	0	70	0	0	1	0	18	6	2	0	0	1	0	0	0	0	1	23	2	8	1
LOC105370753	2	4	0	0	0	2	12	2	6	16	2	0	6	2	1	0	2	12	4	6	17	67	14	4	2	22	4	4	0	16	0	5	1	0	12	1	0	2	0	0	4	0	0	0	0	12	4	0	0
OTUD7A	12	11	23	7	6	0	10	15	45	65	12	0	22	2	4	18	16	12	23	26	107	158	68	10	95	10	66	65	26	102	12	24	12	14	52	17	0	8	0	10	8	12	0	4	30	40	32	11	0
LOC400347	6	1	0	1	3	1	0	11	11	15	3	0	17	1	0	6	6	11	2	0	1	13	4	2	12	2	16	16	13	3	0	19	5	3	23	1	3	0	3	1	0	0	0	4	7	3	4	6	1
UBE2CP4	0	0	0	0	0	0	0	0	0	1	0	0	0	0	0	0	2	0	0	0	0	2	0	0	0	0	3	0	0	0	0	0	0	2	2	0	0	0	0	0	0	0	0	0	0	0	0	0	0
LOC105370939	10	0	0	2	0	0	0	6	17	24	2	0	7	0	0	4	0	13	2	12	10	65	8	2	11	20	22	11	5	6	4	0	2	4	31	4	0	0	2	0	0	0	0	0	3	6	0	0	0
LOC105376707	54	2	12	2	0	70	24	113	539	749	13	0	17	33	14	14	37	385	48	10	319	471	127	90	8	50	1533	819	1	397	12	4	23	14	365	20	10	43	0	7	0	14	0	0	52	327	4	49	0
KLF13	1081	551	1127	559	231	1043	287	1263	3240	3559	1066	92	1276	406	985	730	561	3013	312	1440	2108	3000	1881	1337	1308	452	7091	6247	699	1984	726	1260	1194	662	2967	1358	930	583	347	297	307	408	154	425	675	2530	893	825	142
LOC283710	30	12	16	22	6	8	20	22	67	125	6	4	24	6	24	18	4	44	10	43	57	90	31	18	65	18	182	95	38	110	30	8	38	12	222	22	22	24	6	2	6	12	4	4	74	30	26	14	3
LOC107984092	0	0	0	0	0	0	0	0	0	0	0	0	0	0	0	0	0	0	0	0	0	0	0	0	0	0	0	0	0	0	0	0	0	0	0	0	0	0	0	0	0	0	0	0	0	0	0	0	0
LINC02352	4	0	2	0	0	8	0	0	12	81	4	2	0	0	0	0	2	16	1	8	35	39	2	16	6	10	36	33	0	72	2	0	2	0	192	5	3	8	0	2	0	0	0	4	14	16	0	2	0
LOC107984779	0	0	0	0	0	0	0	0	0	0	0	0	0	0	0	0	0	0	0	0	0	0	0	0	0	0	0	0	0	0	0	0	0	0	0	0	0	0	0	0	0	0	0	0	0	0	0	0	0
MIR211	0	0	0	0	0	0	0	0	0	0	0	0	0	0	0	0	0	1	0	0	0	0	0	0	0	0	0	0	0	0	0	0	0	0	0	0	0	0	0	0	0	0	0	0	0	0	0	0	0
LOC105370752	0	0	0	0	0	0	1	0	0	0	2	0	7	0	0	0	0	0	0	0	0	4	2	0	0	2	0	0	0	0	0	0	2	0	0	6	0	0	0	0	0	0	0	0	0	0	4	0	0
TRPM1	0	0	0	0	0	0	2	2	2	0	0	0	6	0	0	0	0	0	0	4	6	0	2	2	0	18	0	2	1	3	0	2	0	0	4	0	0	0	0	0	0	0	0	4	2	2	1	0	0
RNU6-466P	0	0	0	0	0	13	0	1	3	10	0	0	4	0	0	0	2	0	1	0	10	0	4	0	2	0	26	33	0	39	0	0	0	0	21	0	0	0	0	0	0	0	0	0	2	4	0	0	0
MTMR10	387	255	219	195	66	611	142	658	1324	1641	274	13	415	155	231	220	293	723	107	604	658	920	556	307	351	73	3265	2313	269	2611	111	440	368	110	1243	260	144	191	89	97	69	193	49	189	231	1010	267	451	52
FAN1	105	102	96	91	40	190	47	207	425	761	125	2	120	81	89	103	119	195	119	99	605	788	401	198	94	57	1131	750	93	669	52	111	165	62	1056	86	50	97	38	51	34	42	18	75	84	714	95	158	12
LOC388104	2	0	0	0	0	0	0	2	2	11	2	0	2	0	0	1	0	0	0	0	0	6	0	0	0	0	0	0	0	0	0	0	0	0	2	0	0	1	0	0	0	0	0	0	0	0	1	0	0
LOC100629121	0	0	0	0	0	0	0	0	0	0	0	0	0	0	0	0	0	0	0	0	0	0	0	0	0	0	0	0	0	0	0	0	0	0	1	0	0	0	0	0	0	0	0	0	0	1	0	0	0
HERC2P10	0	0	0	0	0	2	0	14	2	6	1	0	0	0	0	0	0	0	0	1	0	2	4	2	2	1	5	4	0	2	0	4	0	1	10	0	0	0	0	2	0	0	0	0	5	0	0	0	0
RN7SL82P	0	0	0	0	0	0	0	0	0	0	0	0	0	0	0	0	0	1	0	0	0	0	0	0	0	0	0	0	2	0	0	2	0	0	0	0	0	0	0	0	0	0	0	0	0	0	0	0	0
LOC107987436	0	0	0	0	0	0	0	0	0	0	0	0	0	0	0	0	0	0	0	0	0	0	0	0	0	0	0	0	0	0	0	0	0	0	0	0	0	0	0	0	0	0	0	0	0	0	0	0	0
LOC101930434	8	0	0	0	0	4	2	0	4	0	2	0	6	2	0	4	4	3	1	6	2	24	0	4	6	4	2	4	0	0	2	4	16	0	8	0	2	0	0	0	2	0	0	0	8	0	2	4	0
LOC107984025	0	0	0	0	0	0	0	0	0	0	2	0	0	0	0	0	2	0	0	0	0	0	0	0	2	0	4	0	0	2	0	0	0	0	9	0	0	0	0	0	2	0	0	0	0	2	0	0	0
LOC100288637	36	4	14	14	16	21	6	30	100	146	26	0	36	0	30	12	31	17	6	32	41	29	74	23	20	2	217	153	18	47	8	10	19	6	553	16	21	14	5	8	10	4	7	8	26	167	30	34	10
ARHGAP11B	43	15	12	3	4	17	17	29	265	214	24	0	15	1	25	4	33	19	8	26	47	51	75	19	3	0	388	395	26	71	4	16	14	7	377	4	5	34	9	4	0	8	2	2	17	278	14	32	0
RN7SL628P	0	0	0	0	0	0	0	0	2	8	0	0	0	0	0	0	0	0	0	0	1	6	0	0	0	0	8	2	0	0	0	0	0	0	0	0	2	0	0	0	0	0	0	0	0	1	0	2	0
GOLGA8H	26	12	0	9	4	10	14	8	17	55	2	0	6	10	11	1	6	9	7	6	101	124	37	13	4	10	66	27	14	51	2	0	4	4	57	8	0	2	0	0	2	2	0	0	5	10	9	13	0
ARHGAP11B-DT	24	2	2	6	2	12	11	11	25	64	17	0	21	0	2	12	6	12	4	20	51	40	45	11	12	2	59	22	0	45	4	3	10	2	57	4	8	8	2	4	0	8	0	2	14	25	13	13	0
ULK4P1	4	0	0	0	2	0	0	0	0	8	0	0	0	0	0	0	0	1	0	0	9	8	2	0	0	0	5	0	8	7	0	0	5	0	5	0	0	0	0	0	6	0	0	4	2	0	2	10	0
DNM1P29	0	0	0	0	0	0	0	0	0	0	0	0	0	1	0	0	0	0	0	0	0	0	0	0	4	0	0	0	0	0	0	0	0	0	0	0	0	0	0	0	0	0	0	0	0	0	0	0	0
RN7SL196P	0	0	0	0	0	0	0	0	0	0	0	0	0	0	0	0	0	0	0	0	0	0	0	0	0	0	0	0	0	0	0	0	0	0	0	0	0	0	0	0	0	0	0	0	0	0	0	0	0
LOC100288482	0	0	0	0	0	0	0	0	0	0	0	0	0	0	0	0	0	0	1	0	0	4	0	0	0	0	5	0	0	0	0	0	0	0	0	0	0	0	0	0	0	0	0	0	2	0	0	0	0
GOLGA8R	16	0	10	4	2	6	3	12	17	59	10	2	6	4	10	4	16	14	26	20	53	86	31	14	31	8	62	32	6	47	0	15	8	2	76	10	6	12	0	4	1	11	0	6	20	18	18	12	0
LOC105376704	0	0	0	0	0	1	0	0	0	6	0	0	1	0	0	0	0	0	0	0	0	5	0	0	0	0	1	7	0	0	0	0	0	0	4	0	2	0	0	0	0	0	0	0	0	1	0	0	0
MPHOSPH10P3	2	0	10	20	0	0	16	17	24	28	8	0	6	0	12	16	16	17	8	0	11	8	7	24	18	0	10	31	10	6	2	6	14	6	8	6	12	6	0	4	0	10	0	2	12	8	14	3	0
LOC105370750	0	0	0	0	0	0	0	0	0	0	0	0	0	0	0	0	0	0	0	0	0	0	0	0	0	0	0	0	0	0	0	0	0	0	0	0	0	0	0	0	0	0	0	0	0	0	0	0	0
LOC101929944	0	0	0	0	0	0	0	0	0	0	0	0	0	0	0	0	0	0	0	0	0	0	0	0	0	0	0	0	0	0	0	0	0	0	0	0	0	0	0	0	0	0	0	0	0	0	0	0	0
GOLGA8Q	0	0	0	6	1	20	8	2	4	24	3	0	2	6	2	4	6	8	11	16	27	49	45	7	10	0	44	7	4	20	4	12	10	14	29	2	4	8	0	2	0	3	0	2	6	6	4	3	0
DNM1P50	0	0	0	0	0	0	0	0	0	2	0	0	0	0	0	0	0	0	0	0	2	4	2	2	0	0	0	0	0	2	0	0	0	0	0	0	0	0	0	0	0	0	0	0	0	0	0	0	0
ULK4P2	3	0	0	0	0	0	0	0	2	4	0	0	0	0	0	0	0	2	0	8	18	14	2	0	0	2	6	2	10	1	0	0	2	0	0	0	2	0	0	0	0	0	6	0	2	2	0	2	0
LOC105370751	0	0	0	0	0	0	0	0	0	0	0	0	0	0	0	0	0	0	0	0	0	0	0	0	0	0	0	0	0	5	0	4	0	0	0	0	0	0	0	0	0	0	0	0	0	2	0	0	0
CHRFAM7A	5	3	1	0	0	2	0	16	8	16	6	0	14	0	0	3	0	2	0	2	14	4	19	3	4	1	14	13	10	33	0	2	0	0	44	12	0	2	0	2	0	4	2	0	2	2	0	6	2
LOC102724055	0	0	0	2	0	6	0	0	2	8	0	0	0	0	0	0	0	0	0	0	12	2	8	2	2	0	5	0	0	25	0	0	0	0	20	10	0	0	0	0	0	0	0	0	0	2	0	0	0
RNU6-17P	0	0	0	0	0	0	0	0	0	0	0	0	0	0	0	0	0	0	0	0	0	0	0	0	0	0	0	0	0	0	0	0	0	0	0	0	0	0	0	0	0	0	0	0	0	0	0	0	0
LOC728424	0	0	0	0	0	0	0	7	0	0	0	0	0	0	0	4	0	0	0	0	4	0	0	0	0	0	0	0	0	1	0	0	2	0	0	0	0	0	0	0	0	0	0	0	0	0	6	0	2
LINC02249	8	2	0	2	0	0	0	2	4	0	0	0	0	0	0	0	0	0	0	0	4	0	0	0	0	0	0	0	0	0	0	0	0	0	0	2	0	0	0	0	0	0	0	0	0	1	0	0	0
LOC105370747	0	0	0	0	0	0	0	0	0	0	0	0	0	0	0	0	0	0	0	1	0	0	0	0	0	0	0	0	0	0	0	0	2	0	0	0	0	0	0	0	0	0	0	0	0	0	0	0	0
LOC105370746	0	0	0	0	0	0	0	0	0	0	0	0	0	0	0	0	0	0	0	0	0	0	0	0	0	0	0	0	0	0	0	0	0	0	0	0	0	0	0	0	0	0	0	0	0	0	0	0	0
DNM1P30	0	0	0	0	0	0	0	0	0	0	0	0	0	0	1	0	0	0	0	0	0	0	0	0	0	0	0	0	0	0	0	0	0	0	0	0	0	0	0	0	0	0	0	0	0	0	4	0	0
RN7SL469P	0	0	0	0	0	0	0	0	0	0	0	0	0	0	0	0	0	0	0	0	0	0	0	0	0	0	0	0	0	0	0	0	0	0	0	0	0	0	0	0	0	0	0	0	0	0	0	0	0
LOC101929922	0	0	0	0	0	0	0	0	0	0	0	0	0	0	0	0	0	0	0	0	0	0	0	0	0	0	0	0	0	0	0	0	0	0	0	0	0	0	0	0	0	0	0	0	0	0	0	0	0
GOLGA8T	0	0	1	0	0	0	0	6	3	9	0	0	0	0	2	0	0	3	0	2	12	10	6	2	4	0	10	5	0	16	0	6	4	0	9	0	4	1	2	0	0	4	0	2	0	2	0	0	0
ULK4P3	0	0	2	2	0	0	0	6	0	8	0	0	0	0	0	0	2	0	0	0	8	4	6	0	6	2	1	0	0	11	0	4	0	0	2	0	0	0	0	0	2	0	0	0	2	0	0	0	0
DNM1P28	0	0	0	2	0	0	2	0	0	0	0	0	0	0	0	0	0	0	0	0	0	0	0	0	0	0	0	0	0	0	0	0	0	0	0	0	0	0	0	0	0	0	0	0	0	0	0	0	0
RN7SL673P	0	0	0	0	0	0	0	0	0	2	0	0	0	0	0	0	0	0	0	1	0	0	0	0	0	0	0	0	0	0	0	0	0	0	0	0	0	0	0	0	0	0	0	0	0	0	0	0	0
GOLGA8J	8	4	0	0	0	4	4	0	16	0	2	0	0	1	0	4	0	7	0	15	12	24	20	2	2	3	3	8	0	6	0	8	0	0	10	0	0	2	0	0	0	6	0	0	1	0	4	1	2
SYNGR2P1	0	0	0	0	1	0	0	1	3	10	8	0	0	2	6	0	0	7	1	5	1	1	2	0	6	9	11	11	0	3	0	0	3	0	1	0	4	2	0	0	0	0	0	0	0	6	4	2	1
NCAPGP2	0	0	0	0	0	0	0	0	0	0	0	0	0	0	0	0	0	0	0	0	0	2	0	0	0	0	2	2	0	0	0	0	0	0	0	0	0	0	0	0	0	0	0	0	0	0	0	0	0
HMGN2P5	184	208	384	62	18	163	85	105	190	216	129	15	165	42	176	128	250	158	113	263	220	231	192	294	97	30	443	357	96	349	180	135	165	35	217	103	99	151	144	128	124	202	45	198	193	593	122	161	9
TJP1	1539	762	726	281	246	1723	367	1734	3616	4421	918	62	1510	491	906	497	931	1948	414	1555	2253	2615	1991	832	1074	170	8606	6632	1580	6054	279	1098	843	232	3104	1412	534	803	192	356	318	595	217	580	665	3794	710	1125	182
LOC105370743	5	2	0	0	0	22	3	18	48	120	2	0	4	3	10	0	2	22	0	0	4	14	2	8	9	0	248	74	2	220	4	2	0	0	30	8	0	14	0	2	6	6	0	4	2	42	16	17	0
LOC100130111	26	10	11	0	2	39	0	9	70	82	34	0	37	17	20	10	18	52	0	6	14	8	7	4	10	6	117	117	24	218	3	17	5	2	57	48	16	23	4	4	6	37	0	7	8	89	18	22	0
TUBBP8	0	0	0	0	0	0	0	4	0	2	0	0	0	0	0	0	0	0	0	1	6	0	4	0	0	0	0	0	0	0	0	0	0	0	36	0	0	0	0	0	0	0	0	0	0	0	0	0	0
NSMCE3	45	18	71	24	20	18	24	40	91	170	52	6	45	4	27	22	34	54	48	73	181	171	101	82	37	46	164	119	57	62	40	95	47	35	153	37	16	22	18	27	15	42	18	34	34	94	34	40	18
LOC100420707	3	0	2	0	0	6	5	15	18	12	1	0	2	0	2	1	0	8	1	2	8	12	4	0	0	0	76	40	1	8	0	3	2	0	29	0	0	0	0	0	0	0	0	0	2	3	0	8	2
FAM189A1	0	1	6	4	0	34	2	2	81	90	47	0	4	0	0	2	2	40	0	10	12	15	12	2	7	22	252	160	15	25	0	0	2	0	96	8	15	2	2	0	9	0	0	0	4	90	1	23	2
APBA2	46	32	41	20	36	37	26	73	45	191	27	12	120	18	114	33	22	42	20	42	267	354	163	92	141	38	182	143	64	94	38	38	102	30	73	67	68	18	16	18	25	8	4	4	71	8	13	22	8
PDCD6IPP2	4	0	4	10	0	17	2	4	6	33	7	0	2	0	2	4	3	18	1	0	10	5	34	16	10	0	18	8	13	18	0	9	0	1	12	8	1	3	2	0	1	7	0	6	1	31	2	4	1
LOC100289656	0	0	0	0	0	0	0	0	0	0	0	0	0	0	0	0	0	0	0	0	0	0	2	0	0	2	0	0	0	0	0	0	4	0	0	0	2	0	0	0	0	0	0	0	0	0	0	0	0
LOC100996670	8	2	0	0	0	0	0	0	4	2	0	0	0	0	0	0	2	0	0	0	10	4	4	0	0	0	0	4	0	0	0	0	0	0	0	0	0	0	0	0	0	0	0	0	0	2	0	0	0
WHAMMP2	18	12	16	6	0	0	0	11	6	15	6	0	3	0	12	14	2	10	5	23	61	89	41	16	32	10	12	20	26	35	1	10	20	2	41	8	8	7	0	8	7	8	0	4	3	0	10	3	0
RN7SL719P	0	0	0	0	0	0	0	0	0	0	0	0	0	0	0	0	0	0	0	0	0	0	0	0	0	0	0	0	0	0	0	0	0	0	0	0	0	0	0	0	0	0	0	0	0	0	0	0	0
LOC107984746	0	0	0	0	0	0	0	0	0	0	0	0	0	0	0	0	0	0	0	0	0	0	0	0	0	0	0	0	0	0	0	3	0	0	0	0	0	0	0	0	0	0	0	0	0	0	0	0	0
GOLGA8M	27	2	4	2	0	2	1	6	25	55	4	0	8	2	4	2	12	25	8	0	95	164	100	0	9	16	29	40	0	57	0	3	8	8	72	14	6	6	2	0	0	4	0	0	8	2	10	4	0
LOC100419574	7	0	0	0	0	4	0	0	23	24	2	0	0	0	2	0	1	2	4	0	10	31	10	0	0	0	40	19	0	22	3	0	2	2	48	0	0	2	0	2	0	6	0	0	0	9	0	1	0
HERC2P9	116	22	30	8	19	102	25	135	387	391	48	0	34	53	15	17	81	103	32	62	294	424	358	46	55	13	664	734	35	358	6	49	53	8	465	45	20	31	4	2	0	44	7	6	34	142	12	59	4
HERC2P11	0	0	0	0	0	0	0	2	0	0	0	0	2	0	0	0	0	2	0	0	0	6	4	0	4	0	1	4	6	4	0	1	0	2	6	0	0	0	0	0	0	0	0	0	0	1	0	0	0
LOC105369220	0	0	0	0	0	0	0	0	0	0	0	0	0	0	0	0	0	0	0	2	0	0	0	0	0	0	0	1	0	0	0	0	0	0	0	0	0	0	0	0	0	0	0	0	0	0	0	0	0
LOC100132202	6	0	0	4	0	0	0	8	12	0	0	0	6	0	4	12	2	8	0	20	24	27	20	0	12	129	0	11	22	0	0	17	8	50	0	20	4	0	0	0	0	0	0	0	1	0	2	0	0
MPHOSPH10P8	0	0	6	0	0	0	0	0	0	0	0	0	0	0	0	0	0	0	0	4	0	0	0	0	4	0	0	0	0	0	0	0	0	0	0	0	0	0	0	0	0	0	0	0	0	0	0	0	0
GOLGA8G	4	0	0	0	0	0	0	0	0	0	0	0	0	0	0	4	0	0	0	8	0	0	0	0	0	0	1	0	0	0	0	0	2	0	0	0	2	0	0	0	0	0	0	0	0	1	0	0	0
ABCB10P4	2	0	0	0	0	0	0	0	0	0	0	0	0	0	0	2	2	2	0	0	0	0	1	1	0	0	2	0	0	0	0	0	0	0	0	0	0	0	0	0	0	0	0	0	0	0	0	0	0
MIR4509-3	0	0	0	0	0	0	0	0	0	0	0	0	0	0	0	0	0	0	0	0	0	0	0	0	0	0	0	0	0	0	0	0	0	0	0	0	0	0	0	0	0	0	0	0	0	0	0	0	0
LOC101059997	0	0	0	0	0	2	0	0	0	0	3	0	4	0	0	0	3	0	0	2	2	0	0	0	0	0	0	0	0	0	0	10	0	0	0	0	0	0	0	0	0	0	0	0	0	0	0	0	0
MIR4509-2	0	0	0	0	0	0	0	0	0	0	0	0	0	0	0	0	0	0	0	0	0	0	0	0	0	0	0	0	0	0	0	0	0	0	0	0	0	0	0	0	0	0	0	0	0	0	0	0	0
ABCB10P3	0	0	0	0	0	0	0	0	4	1	0	0	0	0	0	0	0	0	0	0	0	0	0	0	0	0	0	0	0	0	0	0	0	0	0	0	0	0	0	0	0	0	0	0	0	0	0	0	0
GOLGA8F	1	0	0	0	0	0	0	0	0	0	0	0	0	0	4	0	0	0	0	0	2	0	0	0	0	2	0	0	0	4	0	0	0	0	0	0	2	0	0	0	0	0	0	0	0	0	1	2	0
MPHOSPH10P7	0	0	0	0	0	0	0	0	0	0	0	0	0	0	0	0	0	0	0	0	0	0	0	0	0	0	0	0	0	0	0	0	0	0	0	0	0	0	0	0	0	0	0	0	0	0	0	0	0
GOLGA6L22	0	0	0	12	0	2	4	2	3	0	6	0	11	0	17	10	7	6	0	47	34	29	12	0	55	333	0	12	22	0	0	22	9	34	4	16	0	0	0	0	0	0	0	0	2	0	4	0	6
LOC101060587	0	0	0	0	0	0	0	0	0	0	0	0	0	0	0	0	0	0	0	0	0	0	0	0	0	0	0	0	0	0	0	0	0	0	0	0	0	0	0	0	0	0	0	0	0	0	0	2	0
HERC2P1	2	0	0	0	0	0	0	0	1	2	0	0	0	0	0	0	0	0	2	1	2	0	0	0	0	0	1	0	0	1	0	0	2	6	2	0	0	0	0	1	0	0	0	0	0	4	0	0	0
RPL41P2	0	2	0	2	0	0	0	0	10	33	2	0	4	2	6	0	6	5	2	0	25	26	16	12	10	0	44	15	0	54	2	4	4	1	27	0	2	7	0	0	2	0	0	0	7	34	0	0	0
HERC2	770	233	419	159	115	1101	199	1131	2650	4512	819	42	667	298	314	280	597	1549	380	665	2858	3861	1866	1021	606	360	6829	4373	520	4451	247	544	697	210	5304	439	297	584	126	170	134	176	67	160	422	3627	275	849	60
RPL5P32	0	0	0	0	0	0	0	0	0	0	0	0	0	0	0	0	0	0	0	0	0	6	0	0	0	0	0	0	0	0	0	0	0	0	4	0	0	0	0	0	0	0	0	0	0	0	0	0	0
OCA2	0	2	1	4	0	0	5	3	5	6	2	0	3	0	2	2	8	4	0	1	14	40	18	0	6	0	1	2	0	2	4	4	0	3	95	2	0	4	0	0	2	0	0	0	1	2	8	0	0
LOC100421667	0	0	0	0	0	0	0	2	0	0	0	0	0	0	0	0	0	0	0	0	1	0	0	0	0	0	0	0	0	0	0	0	0	0	2	0	0	0	0	0	0	0	0	0	0	0	0	0	0
MIR4509-1	0	0	0	0	0	0	0	0	0	0	0	0	0	0	0	0	0	0	0	0	0	0	0	0	0	0	0	0	0	0	0	0	0	0	0	0	0	0	0	0	0	0	0	0	0	0	0	0	0
ABCB10P1	10	0	0	0	0	0	0	0	2	0	2	0	6	0	0	4	4	2	0	0	0	0	0	4	4	0	0	0	0	0	0	0	0	0	0	0	0	4	0	2	0	0	0	0	2	4	2	5	0
RN7SL106P	0	0	0	0	0	0	0	0	0	0	0	0	0	0	0	0	0	0	0	0	0	0	0	0	0	0	0	0	0	0	0	0	0	0	0	0	0	0	0	0	0	0	0	0	0	0	0	0	0
GOLGA8DP	0	0	0	0	0	0	2	0	0	0	2	0	0	0	0	0	2	0	0	0	8	0	0	0	0	2	1	0	0	0	0	0	0	0	0	0	0	0	0	0	0	0	0	0	0	0	4	2	0
MPHOSPH10P5	0	0	0	0	0	0	0	0	0	0	0	0	0	0	0	0	0	0	0	0	0	0	0	0	0	0	0	0	0	0	0	0	0	0	0	0	0	0	0	0	0	0	0	0	0	0	0	0	0
GOLGA6L1	0	1	0	0	2	0	0	2	1	0	0	0	4	0	7	4	0	4	0	17	6	16	0	0	6	16	0	0	0	0	0	4	2	9	0	3	5	0	0	0	0	0	0	0	2	0	0	0	2
LOC101060118	0	0	0	0	0	0	0	2	0	0	0	0	0	0	0	0	0	0	0	0	0	0	0	0	0	0	0	0	0	0	0	0	0	0	0	0	0	0	0	0	0	0	0	0	0	0	0	0	0
ELMO2P1	7	0	0	2	0	0	0	2	0	2	6	0	16	0	0	0	2	1	0	0	12	4	8	0	8	6	0	0	0	0	0	8	0	6	0	0	0	0	0	0	0	0	0	0	1	0	0	0	2
TUBGCP5	85	78	89	29	28	54	47	80	200	409	70	8	97	26	43	71	91	66	65	106	374	508	352	116	102	36	499	454	66	410	66	94	105	27	426	58	54	45	16	22	41	46	26	48	82	355	77	72	20
PRB1	6	0	0	2	0	0	0	0	11	4	0	0	0	0	0	1	1	2	2	2	18	2	2	0	0	14	0	17	0	2	0	0	0	0	0	2	0	0	0	0	0	0	0	0	0	1	8	2	0
PRB4	0	0	0	0	0	0	0	2	32	8	4	0	1	0	0	0	9	4	0	12	27	33	10	0	2	0	4	42	0	8	0	8	8	0	8	0	1	0	0	0	0	0	0	0	4	0	0	4	0
PRB3	11	10	0	0	0	4	0	4	19	6	0	0	14	4	0	0	2	2	2	8	26	8	9	0	0	6	9	29	2	2	0	0	6	0	9	0	0	1	2	2	0	0	0	0	4	1	18	1	0
LOC100420583	6	0	0	0	0	0	0	2	42	18	0	0	0	0	0	0	2	19	0	7	23	3	10	0	6	4	5	25	0	1	0	0	0	0	22	0	0	2	1	0	0	0	0	0	4	1	0	5	0
LOC107987435	0	0	0	0	0	0	0	0	0	0	0	0	0	0	0	0	0	0	0	0	0	0	0	0	0	0	0	0	0	0	0	0	0	0	0	0	0	0	0	0	0	0	0	0	0	0	0	0	0
TAS2R42	0	0	0	0	0	0	0	0	0	0	0	0	0	0	0	0	0	0	2	0	4	0	2	0	0	0	3	2	0	2	0	0	2	0	2	0	2	0	0	0	0	0	0	0	0	2	0	0	0
TAS2R67P	0	0	0	0	0	0	0	5	12	3	0	0	0	0	0	0	0	0	2	0	3	2	5	0	0	10	4	0	0	10	0	0	0	2	2	2	2	0	0	0	0	0	0	0	0	0	0	2	0
SMIM10L1	218	164	153	65	47	127	75	211	270	286	126	6	208	46	167	77	90	155	58	287	268	252	312	109	225	18	361	496	149	192	24	229	211	77	204	156	111	64	25	40	77	71	14	121	88	148	164	138	25
TAS2R30	17	2	4	0	2	15	0	16	65	71	0	0	12	6	2	0	8	20	4	0	143	178	41	6	0	0	68	128	0	100	0	0	12	0	40	0	4	0	0	0	0	14	0	2	10	38	6	6	0
TAS2R45	0	0	0	0	0	0	0	0	0	0	0	0	0	0	0	0	0	0	0	0	0	0	0	0	0	0	0	0	0	0	0	0	0	0	0	0	0	0	0	0	0	0	0	0	0	0	0	0	0
TAS2R68P	0	0	0	0	0	0	0	0	0	0	0	0	0	0	0	0	0	0	0	0	0	0	0	0	0	0	0	0	0	0	0	0	0	0	0	0	0	0	0	0	0	0	0	0	0	0	0	0	0
TAS2R46	2	0	2	0	0	0	2	2	10	26	0	0	0	0	0	0	2	6	2	0	66	33	22	4	0	0	20	35	0	21	0	0	0	0	8	0	0	0	0	0	0	0	0	0	2	19	0	0	0
TAS2R63P	0	0	0	0	0	0	0	0	20	4	2	0	0	2	0	0	7	3	0	0	54	19	5	0	6	0	10	33	0	10	0	0	0	0	2	0	2	0	0	0	0	0	0	1	0	6	2	0	0
TAS2R31	8	2	2	0	0	0	0	21	40	46	0	0	0	4	0	2	4	5	4	8	107	90	43	18	7	23	58	68	0	42	0	2	0	0	25	0	2	4	0	0	0	2	0	0	4	34	0	2	0
TAS2R19	2	2	0	0	0	0	0	1	42	21	2	0	0	0	0	0	4	15	3	0	70	99	11	18	2	9	24	110	0	34	0	2	2	2	21	0	0	0	0	0	0	2	0	0	6	24	8	6	0
TAS2R20	14	0	0	0	4	4	2	6	39	41	6	0	7	2	4	2	1	17	2	0	89	73	43	8	6	4	34	151	0	45	0	2	4	0	51	0	5	2	2	0	0	2	0	0	2	21	2	3	0
TAS2R50	5	0	0	0	0	0	3	0	10	20	0	0	4	0	0	0	0	1	2	0	39	20	16	2	9	6	2	40	0	18	0	0	0	0	8	0	0	0	0	0	0	0	0	0	2	18	0	0	0
TAS2R15P	13	0	0	0	0	2	2	8	19	31	0	0	0	2	6	0	6	10	6	2	58	41	26	0	0	0	41	45	0	36	0	0	0	2	21	0	0	0	0	0	0	5	0	0	4	8	0	5	0
TAS2R14	6	0	0	0	0	4	3	10	31	24	0	0	2	0	2	4	2	10	2	0	42	50	18	6	0	0	21	54	6	18	0	2	0	0	16	0	0	0	0	0	0	0	0	0	16	11	0	0	0
PRH1-TAS2R14	0	0	0	0	0	0	0	0	0	0	0	0	0	0	0	0	0	0	0	0	0	0	0	0	0	0	0	0	0	0	0	0	0	0	0	0	0	0	0	0	0	0	0	0	0	0	0	0	0
PRH2	15	2	2	2	0	0	16	12	94	84	2	0	4	4	10	10	9	31	10	10	144	172	52	3	22	24	53	126	0	43	2	15	12	6	42	0	0	0	0	4	0	2	0	2	7	27	14	4	2
TAS2R13	10	8	0	0	2	2	0	2	47	21	2	0	8	2	0	0	0	8	2	0	59	48	20	0	0	0	41	80	0	24	0	0	0	0	18	0	3	0	0	0	0	2	0	0	6	7	0	2	0
TAS2R12P	2	0	0	0	0	2	2	4	26	16	0	0	14	0	0	0	2	6	8	0	44	36	18	0	0	16	24	38	0	8	0	2	0	0	13	0	0	2	0	0	0	4	0	0	0	10	0	0	0
PRH1	4	0	0	0	0	0	2	1	12	5	0	0	0	2	0	0	1	4	0	4	22	5	5	0	0	10	10	29	1	8	0	0	2	2	4	0	4	0	0	1	0	0	0	0	2	5	0	0	0
PRR4	0	0	0	0	0	0	0	0	4	1	0	0	0	0	0	0	0	0	0	0	1	0	0	0	0	0	0	2	0	0	0	0	0	0	0	0	0	0	0	0	0	0	0	0	0	1	0	0	0
PRH1-PRR4	0	0	0	0	0	0	0	0	0	0	0	0	0	0	0	0	0	0	0	0	0	0	0	0	0	0	0	0	0	0	0	0	0	0	0	0	0	0	0	0	0	0	0	0	0	0	0	0	0
LOC100420580	0	0	0	0	0	0	0	0	0	0	0	0	0	0	0	0	0	0	0	0	0	0	0	0	0	0	0	0	0	0	0	0	0	0	0	0	0	0	0	0	0	0	0	0	0	0	0	0	0
TAS2R10	12	0	0	0	0	0	2	0	16	9	0	0	0	0	0	0	0	0	0	0	57	11	9	2	1	0	0	23	0	2	0	0	2	0	2	0	0	0	0	0	0	0	0	0	3	2	5	0	0
LOC107984459	28	11	4	2	0	0	2	7	62	56	0	0	6	6	0	2	4	14	2	0	167	49	64	13	6	11	31	85	0	46	3	6	2	9	54	0	2	4	4	0	0	6	0	0	18	6	10	4	0
TAS2R9	0	0	0	0	0	0	2	1	2	0	0	0	10	0	0	0	0	0	0	0	0	0	0	0	0	0	2	2	0	0	0	0	0	0	0	0	0	0	0	0	0	0	0	0	0	0	0	0	0
TAS2R8	2	0	0	8	2	0	0	2	2	0	0	0	0	0	0	0	0	0	0	0	6	0	0	0	0	0	0	0	0	0	0	0	0	2	0	0	0	0	0	0	0	0	0	0	0	0	0	0	0
TAS2R7	0	0	0	0	0	0	0	2	0	0	0	0	0	0	0	0	2	0	0	0	2	2	0	0	0	0	0	0	0	0	0	0	0	0	0	0	0	0	0	0	0	0	0	0	0	0	0	0	0
IFITM10	25	0	6	12	3	14	13	24	27	91	22	2	8	16	16	12	12	56	2	20	36	56	48	19	39	0	235	59	18	108	8	18	25	26	83	30	20	13	11	5	3	4	2	4	8	47	8	10	0
KRTAP5-6	0	0	0	3	0	0	0	0	0	0	0	0	0	0	0	0	0	0	0	0	0	0	1	0	0	0	0	0	0	0	0	0	0	0	0	0	0	0	0	0	0	0	0	0	0	0	0	0	0
LINC02708	1	0	0	0	0	0	2	0	0	2	0	0	0	0	0	0	0	0	0	2	0	2	4	0	0	0	2	0	0	0	0	0	0	0	0	0	0	0	0	0	0	0	0	0	0	0	0	0	0
FAM99B	0	0	0	0	0	0	0	0	0	0	0	0	0	0	0	0	0	0	0	2	0	12	0	0	0	0	2	2	0	0	0	0	0	0	0	6	0	0	0	0	0	0	0	0	0	0	0	0	0
FAM99A	0	0	0	0	0	0	0	0	0	0	0	0	0	0	0	0	0	0	0	0	0	0	4	0	0	0	4	0	0	0	0	0	0	0	0	0	0	0	0	0	0	0	0	0	0	0	0	0	0
KRTAP5-5	2	0	0	0	0	0	0	0	0	0	0	0	0	0	0	0	1	0	0	0	2	0	0	0	0	0	0	0	0	6	0	0	0	0	48	0	2	2	0	0	0	0	0	0	2	0	2	0	0
KRTAP5-4	0	0	0	0	0	0	0	0	0	0	0	0	0	0	0	0	0	0	0	0	0	1	0	0	0	11	0	0	0	0	0	0	0	0	6	0	0	0	0	0	0	0	0	0	0	0	0	0	0
KRTAP5-3	0	0	0	0	0	0	0	0	0	0	0	0	0	0	0	0	0	0	0	0	2	0	0	0	0	0	0	0	0	0	0	4	0	0	0	0	0	0	0	0	0	0	0	0	0	0	0	0	0
KRTAP5-2	0	0	0	0	0	0	0	0	0	2	0	0	0	0	0	0	0	0	0	0	0	0	0	0	0	0	0	0	3	2	0	0	0	0	0	0	0	0	0	0	0	0	0	0	0	0	0	0	0
KRTAP5-1	6	10	0	9	0	78	8	16	22	34	18	0	16	9	6	0	14	15	0	0	2	28	13	0	44	6	62	35	4	107	0	2	4	0	150	2	12	36	0	2	0	0	0	0	4	43	20	31	4
KRTAP5-AS1	6	0	1	4	0	18	0	5	16	29	14	2	20	5	3	0	11	16	0	11	0	4	6	2	0	2	47	34	14	55	3	0	8	0	142	13	4	10	0	0	2	3	0	2	2	55	0	7	0
DUSP8	95	16	33	18	4	276	22	209	354	569	262	0	118	66	71	22	191	394	24	90	41	661	96	81	131	34	2381	601	109	1611	20	46	97	20	816	145	108	132	11	15	5	59	20	10	37	638	56	256	7
LOC105379626	0	0	0	0	0	0	0	0	0	0	0	0	0	0	0	0	0	0	0	0	0	0	0	0	0	0	0	0	0	0	0	0	0	0	0	0	0	0	0	0	0	0	0	0	0	0	0	0	0
LOC105379586	6	0	0	0	0	0	0	0	0	0	0	0	0	0	0	0	2	0	0	0	0	0	0	0	0	24	0	0	0	0	0	0	0	4	0	0	0	0	0	0	0	0	0	0	0	0	0	0	0
LOC105377775	0	0	0	4	0	0	0	0	0	0	2	0	0	0	2	0	0	0	0	4	0	0	0	0	0	2	0	2	6	0	0	0	0	0	0	0	0	0	0	0	0	0	0	0	0	0	0	0	0
LOC105379627	0	0	0	0	0	0	0	0	0	0	0	0	0	0	0	0	0	0	0	0	0	0	0	0	0	0	0	0	0	0	0	0	0	0	0	0	0	0	0	0	0	0	0	0	0	0	0	0	0
FAM20C	385	92	169	48	73	147	119	175	943	1308	159	18	235	59	169	86	182	208	121	201	710	2982	975	278	503	395	880	1653	100	417	70	126	117	73	641	118	216	64	33	82	61	76	82	58	70	158	167	89	8
LOC105375116	0	5	0	0	0	0	1	7	10	5	8	0	4	5	1	12	0	0	3	27	2	16	8	0	31	6	2	16	8	4	0	4	0	2	2	8	3	2	2	2	0	6	2	0	0	0	0	2	0
LOC105375115	0	0	0	0	0	0	0	0	0	0	0	0	1	0	0	0	0	0	0	0	0	0	2	6	0	0	0	2	0	4	0	0	0	0	0	0	0	0	0	0	0	0	0	0	0	0	0	4	0
LOC100507642	8	2	10	11	4	4	6	27	4	4	8	0	14	0	12	12	2	8	2	30	15	31	26	18	29	0	8	4	7	0	4	29	8	0	112	2	6	2	2	2	0	4	4	10	4	9	2	8	0
LOC102723672	0	0	0	2	0	0	0	4	6	8	2	0	6	0	0	2	0	0	4	0	4	2	10	4	2	0	14	15	0	4	0	12	5	0	15	2	2	0	1	2	8	0	0	0	0	6	4	2	0
LOC105375114	0	0	4	0	0	0	4	4	0	6	2	0	0	0	0	4	2	0	0	0	12	4	13	2	0	2	0	5	0	5	0	10	2	6	0	6	0	1	0	0	0	0	0	0	1	0	4	0	0
LOC101929756	6	4	2	0	0	0	0	12	4	2	0	0	12	0	0	0	0	0	0	0	4	19	8	35	13	10	1	7	3	6	0	0	2	0	0	4	0	2	2	2	0	0	0	0	4	2	10	0	0
LOC105375113	0	0	0	0	0	0	0	0	0	0	0	0	0	0	0	0	0	0	2	0	2	0	0	0	0	4	0	0	0	0	0	4	0	0	0	0	4	0	0	0	0	0	0	0	0	0	0	0	0
LOC107986751	0	0	0	0	0	0	0	0	0	0	0	0	0	0	0	0	0	0	0	2	0	0	0	0	0	0	4	0	0	0	0	0	0	0	0	0	0	0	0	0	0	0	0	0	0	0	0	0	0
LOC105375112	0	2	0	0	8	0	0	0	0	2	0	0	0	0	0	0	0	0	0	12	4	0	1	0	4	0	1	0	0	0	0	0	0	2	6	0	0	0	0	0	0	0	0	0	0	0	0	0	0
LOC102723872	0	0	0	0	0	0	2	0	0	6	0	0	0	0	0	0	4	0	0	0	6	10	1	0	0	0	16	0	0	8	0	2	0	0	2	0	0	0	0	0	0	0	0	0	0	2	0	0	0
RNU1-79P	0	0	0	0	0	0	0	0	0	0	0	0	0	0	0	0	0	0	0	0	0	0	0	0	0	0	0	0	0	0	0	0	0	0	0	0	0	0	0	0	0	0	0	0	0	0	0	0	0
LOC107987429	0	0	0	0	0	0	0	0	0	0	0	0	0	0	0	0	0	0	0	0	0	0	0	0	0	0	0	0	0	0	0	0	0	0	0	0	0	0	0	0	0	0	0	0	0	0	0	0	0
LOC112267926	0	0	0	0	0	0	0	0	0	0	0	0	0	0	0	0	0	0	0	0	0	0	0	0	0	0	0	0	0	0	0	0	0	0	0	0	0	0	0	0	0	0	0	0	0	0	0	0	0
LOC107987427	0	0	0	0	0	0	0	0	0	0	0	0	0	0	0	0	0	0	0	0	0	0	0	0	0	0	0	0	0	0	0	0	0	0	0	0	0	0	0	0	0	0	0	0	0	0	0	0	0
LOC105375006	0	0	0	0	0	0	0	2	0	10	0	0	0	4	0	0	0	0	0	0	0	0	0	0	2	0	2	0	0	4	0	0	0	0	8	0	0	0	0	0	0	0	0	0	0	0	0	0	0
TRA-CGC2-1	0	0	0	0	0	0	0	0	0	0	0	0	0	0	0	0	0	0	0	0	0	0	0	0	0	0	0	0	0	0	0	0	0	0	0	0	0	0	0	0	0	0	0	0	0	0	0	0	0
TRA-AGC4-1	0	0	0	0	0	0	0	0	0	0	0	0	0	0	0	0	2	0	0	0	0	0	0	0	0	4	0	0	0	0	0	0	0	0	0	0	0	0	0	0	0	0	0	0	0	0	0	0	0
LINC00533	0	0	0	0	0	0	0	0	0	0	0	0	0	0	0	0	0	0	0	0	2	0	0	0	0	0	0	0	0	0	0	0	0	0	0	0	0	0	0	0	0	2	0	0	0	0	0	0	0
TRT-CGT3-1	0	0	0	1	0	0	0	0	0	0	0	0	0	0	0	0	0	0	0	0	0	0	0	0	0	0	0	0	0	0	0	0	0	0	0	0	0	0	0	0	0	0	0	0	0	0	0	0	0
TRA-TGC2-1	0	1	0	0	0	0	0	0	0	0	0	0	0	0	0	0	0	0	0	0	0	0	0	0	0	0	0	0	0	0	0	0	0	0	0	0	0	0	0	0	0	0	0	0	0	0	0	0	0
LOC105374996	0	0	0	0	0	0	0	0	0	0	0	0	0	0	0	0	0	0	0	5	1	0	0	0	0	0	0	0	0	0	0	0	0	0	0	2	0	0	0	0	0	0	0	0	2	0	0	0	0
TRA-TGC9-1	0	0	0	0	0	0	0	0	0	0	0	0	0	0	0	0	0	0	0	0	0	0	0	0	0	0	0	0	0	0	0	0	0	0	0	0	0	0	0	0	0	0	0	0	0	0	0	0	0
TRA-AGC3-1	0	0	0	0	0	0	0	0	0	0	0	0	0	2	0	0	0	0	0	0	2	0	0	0	0	10	0	0	0	0	0	0	0	3	0	0	0	0	0	0	0	0	0	0	0	0	0	0	0
TRS-GCT4-1	0	0	0	0	0	0	0	0	0	0	0	0	0	0	0	0	0	1	0	0	0	0	0	0	0	0	0	0	0	0	0	0	0	0	0	0	0	0	0	0	0	0	0	0	0	0	0	0	0
TRQ-TTG2-1	0	0	0	0	0	0	0	0	0	0	0	0	0	0	0	0	0	0	0	0	0	0	0	0	0	0	0	0	0	0	0	0	0	0	0	0	0	0	0	0	0	0	0	0	0	0	0	0	0
ZBED9	0	8	2	2	2	12	8	10	23	0	2	2	6	0	6	4	0	4	2	4	4	0	9	10	8	4	32	15	0	80	2	18	2	3	22	0	0	16	2	2	0	2	0	2	2	25	6	8	4
TRR-TCG5-1	0	0	0	0	0	0	0	0	0	0	0	0	0	0	0	0	0	0	0	0	0	0	0	0	0	0	0	0	0	0	0	0	0	0	0	0	0	0	0	0	0	0	0	0	0	0	0	0	0
LOC107986586	0	0	0	0	0	0	0	0	0	0	0	0	0	0	0	0	0	0	0	0	8	0	0	0	0	0	2	0	0	0	0	0	0	0	0	0	0	0	0	0	0	0	0	0	0	0	0	0	2
TRI-TAT3-1	0	0	0	0	0	0	0	0	0	0	0	0	0	0	0	0	0	0	0	0	0	0	0	0	0	0	0	0	0	0	0	0	0	0	0	0	0	0	0	0	0	0	0	0	0	0	0	0	0
GPX5	0	1	0	0	0	0	0	2	2	0	0	0	0	0	2	0	0	2	0	0	0	0	2	0	0	2	0	4	0	0	0	0	2	0	0	0	0	0	0	0	0	0	0	0	0	1	2	0	0
GPX6	0	0	0	0	0	0	0	2	0	0	0	0	0	0	0	0	0	0	0	0	4	2	0	0	0	0	0	0	0	0	0	0	0	0	0	0	0	0	0	0	0	0	0	0	0	0	0	2	4
PROP1	0	0	0	0	0	0	0	0	0	2	0	0	0	0	0	0	0	0	2	2	2	0	0	0	4	0	2	0	0	0	0	0	0	0	0	6	0	0	0	0	0	0	0	0	0	0	0	0	0
SUDS3P1	46	44	51	14	13	51	27	76	71	111	17	2	51	12	38	20	40	97	13	75	80	120	75	56	42	18	182	128	39	99	19	94	60	36	94	65	28	29	8	15	12	26	2	15	34	64	38	50	9
LOC100128340	0	0	0	2	4	0	4	6	6	14	0	0	0	0	6	2	3	4	1	18	4	18	7	4	13	0	32	16	4	4	0	10	6	0	2	6	0	0	2	0	0	2	0	0	0	4	8	2	0
LOC728554	99	26	41	40	46	66	22	52	125	176	119	0	97	7	65	75	155	70	9	111	100	94	52	66	40	14	172	204	48	99	32	122	78	30	150	78	5	26	14	13	10	37	0	50	59	251	62	68	10
MCCC2	578	196	347	197	86	398	87	424	918	1085	418	8	561	83	222	175	657	890	126	461	474	471	392	398	170	47	1911	1691	253	857	161	488	326	165	1244	415	279	150	78	78	144	103	72	147	176	1520	290	395	38
HMGN1P12	0	0	0	0	2	0	0	0	13	16	0	0	2	0	0	0	0	6	0	0	10	5	9	0	0	0	6	17	0	13	0	0	0	0	13	0	0	0	0	0	0	6	0	0	0	15	3	0	0
LOC100419852	0	0	0	0	0	4	6	10	25	32	0	0	0	0	0	0	8	6	0	0	27	44	11	8	0	0	18	29	0	25	0	0	0	0	16	0	0	0	0	0	0	0	0	0	4	20	0	0	0
BDP1	710	427	584	259	132	543	241	785	1643	2175	510	20	578	150	617	402	483	936	322	921	1514	1634	1344	611	494	150	2816	3145	440	1797	220	677	656	192	1517	444	316	418	101	205	256	329	109	424	543	1744	399	494	64
LOC107987434	0	0	0	0	0	0	0	0	0	0	0	0	0	0	0	0	0	0	0	0	0	0	0	0	0	0	0	0	0	0	0	0	0	0	0	0	0	0	0	0	0	0	0	0	0	0	0	0	0
PMCHL2	0	0	0	2	0	0	0	0	0	6	0	0	0	0	0	0	0	0	0	0	5	6	0	0	0	2	2	0	0	0	0	0	0	0	0	0	0	0	0	0	0	0	0	0	0	0	0	0	0
LINC02197	0	0	0	0	0	0	0	0	2	1	0	0	0	0	0	0	0	2	0	2	2	2	2	0	0	0	3	10	0	0	2	0	0	4	0	0	0	0	0	0	0	0	0	0	0	0	4	0	0
LOC107986421	0	0	2	0	0	0	0	10	10	20	0	0	0	2	0	4	0	6	2	20	14	34	11	6	0	28	35	46	2	22	0	0	4	0	9	0	0	4	0	0	0	0	0	2	0	8	2	2	0
LOC441081	6	0	0	4	0	0	2	0	4	27	0	0	3	0	0	0	7	10	0	8	14	15	12	4	0	0	14	4	0	25	0	0	2	1	20	0	0	2	1	6	0	6	0	0	1	6	0	16	0
GUSBP17	2	1	4	0	3	7	0	7	42	122	2	0	5	2	0	2	4	27	11	3	87	156	46	6	8	4	91	38	0	98	1	2	4	0	21	2	2	2	0	0	0	0	0	0	8	30	7	1	0
LOC107987433	0	0	0	0	0	0	0	0	0	0	0	0	0	0	0	0	0	0	0	0	0	0	0	0	0	0	0	0	0	0	0	0	0	0	0	0	0	0	0	0	0	0	0	0	0	0	0	0	0
GUSBP9	38	2	17	6	5	40	7	18	153	357	8	0	9	14	4	10	10	45	20	23	227	436	154	24	14	26	274	176	6	248	4	6	15	8	145	4	8	37	0	3	1	2	2	1	20	75	2	8	0
CDH12P4	0	0	0	0	0	0	0	0	4	4	0	0	0	0	0	0	0	0	0	0	4	3	0	0	0	0	0	2	0	0	0	0	0	0	6	0	0	0	0	0	0	0	0	0	0	0	0	0	0
NAIPP4	13	0	15	16	5	3	0	7	18	71	10	0	6	1	10	22	4	17	9	2	55	63	65	14	2	0	25	18	0	59	6	7	6	0	29	5	4	5	1	4	4	1	0	0	12	29	2	5	0
GTF2H2	38	19	31	21	8	40	10	34	68	97	32	0	75	11	18	18	67	30	8	60	78	66	97	25	22	0	128	191	58	89	21	50	16	8	67	22	18	16	2	9	11	8	8	14	8	78	33	46	4
NAIPP1	0	0	4	1	0	1	4	1	2	5	2	0	2	0	0	0	2	3	2	0	13	10	7	0	0	0	14	11	0	18	0	0	5	7	0	0	3	0	1	0	0	0	1	0	6	2	0	2	2
NAIP	17	4	68	22	24	14	0	13	10	55	22	0	31	6	18	45	17	34	24	38	59	137	82	29	28	10	147	94	34	72	34	18	36	23	44	26	38	21	22	6	10	8	38	27	25	26	8	14	3
SMN1	42	24	54	20	0	16	13	53	16	26	7	0	13	1	9	6	17	23	31	4	50	33	23	24	20	0	35	79	6	32	15	52	36	11	40	87	54	17	2	2	7	6	2	17	17	70	39	11	6
SERF1A	0	0	0	0	0	3	0	0	0	0	2	0	0	2	0	0	2	0	0	0	17	3	0	0	0	0	2	0	0	6	0	0	0	0	0	0	0	2	0	0	0	0	0	0	0	0	0	2	0
CDH12P3	0	0	0	0	0	0	0	1	2	2	0	0	0	0	0	0	0	0	0	0	0	2	0	0	0	0	4	2	0	3	0	0	0	0	2	0	0	0	0	0	0	0	0	0	0	0	0	0	0
NAIPP2	38	22	26	7	16	12	25	50	83	174	11	0	23	13	18	9	7	32	14	38	118	387	187	14	20	16	158	129	34	264	7	31	38	11	110	26	27	18	4	2	12	8	0	6	42	34	38	18	3
SMN2	75	19	16	10	2	42	34	49	45	40	24	0	6	5	19	14	30	56	7	32	75	106	41	45	42	9	61	79	34	68	19	23	81	40	59	96	21	10	6	3	23	2	8	4	9	40	111	23	1
SERF1B	3	20	0	0	0	0	2	3	4	12	0	0	8	0	2	4	3	2	0	0	20	32	24	4	2	6	6	15	0	6	0	3	1	0	1	6	0	2	0	0	0	0	0	0	3	4	0	2	0
CDH12P2	0	0	0	0	0	0	0	0	0	0	0	0	0	0	0	0	0	0	0	0	0	0	0	0	0	0	0	0	0	0	0	0	0	0	0	0	0	0	0	0	0	0	0	0	0	0	0	0	0
LOC105369228	2	0	16	0	2	8	8	8	8	22	7	0	0	0	1	0	7	10	0	0	18	61	19	10	2	0	31	28	8	25	0	0	4	1	18	0	3	0	0	0	0	0	0	0	2	6	0	0	0
LOC105379023	0	0	0	0	0	0	0	0	0	0	0	0	0	0	0	0	0	0	0	0	0	0	0	0	0	0	0	0	0	0	0	0	0	0	0	0	0	0	0	0	0	0	0	0	0	0	0	0	0
LOC112268330	0	0	0	0	0	0	0	0	0	0	0	0	0	0	0	0	0	0	0	0	0	0	0	0	0	0	0	0	0	0	0	0	0	0	0	0	0	0	0	0	0	0	0	0	0	0	0	0	0
GUSBP1	128	63	56	32	32	115	43	178	545	441	49	0	72	48	43	39	58	95	66	110	379	1117	212	72	216	53	772	883	64	439	9	71	86	30	363	26	44	46	26	9	25	16	11	30	72	300	48	88	9
LOC728452	0	0	0	0	0	0	0	2	0	2	0	0	0	0	0	0	0	0	0	0	2	6	0	0	2	8	4	0	0	0	0	0	0	0	0	0	0	0	0	0	0	0	0	0	0	0	0	0	0
LOC728506	2	0	0	0	0	0	0	0	7	15	2	0	0	0	0	0	0	0	2	0	3	21	2	0	0	0	18	2	0	18	0	0	2	0	6	0	0	2	0	0	0	2	0	0	0	5	0	0	0
GUSBP15	31	18	16	5	25	20	11	40	122	344	6	0	7	3	2	13	15	36	24	14	135	417	178	49	36	30	191	148	16	153	12	28	54	10	87	24	24	5	4	6	1	7	2	16	50	64	3	26	2
GUSBP3	7	1	5	0	0	20	4	15	40	86	7	0	4	2	0	16	7	5	1	11	52	74	66	14	4	4	82	40	0	54	2	11	12	0	15	0	3	4	0	0	0	2	0	0	12	39	6	8	0
LOC105379623	0	0	0	0	0	2	0	0	10	2	0	0	0	0	0	2	2	0	1	3	0	6	0	0	8	0	8	1	4	8	0	0	0	0	10	0	0	1	0	0	0	0	0	0	0	7	0	2	0
RARRES2P4	0	0	0	0	0	0	0	0	0	0	0	0	0	0	0	0	0	2	0	0	0	0	0	0	0	0	0	0	4	0	0	0	0	0	0	0	0	0	0	0	0	0	0	0	0	0	0	0	0
FRG2	0	0	0	0	0	0	0	0	0	0	2	0	0	0	0	0	0	0	0	0	0	0	6	0	0	0	0	0	0	0	0	0	0	0	0	0	0	0	0	0	0	0	0	0	0	0	0	0	2
DUX4L9	0	3	0	4	0	6	2	0	0	4	4	0	0	0	0	2	0	2	0	3	2	2	0	0	0	1	0	0	4	4	0	0	0	2	0	2	2	0	0	0	0	0	0	0	0	0	0	0	1
RNA5SP175	0	0	0	0	0	0	0	0	0	0	1	0	0	0	0	0	0	0	0	0	1	0	0	0	0	0	0	0	0	0	0	0	0	0	0	0	0	0	0	0	0	0	0	0	0	0	0	2	0
RNA5SP174	0	0	0	0	0	0	0	0	0	0	0	0	0	0	0	0	0	0	0	0	0	4	2	0	0	0	0	0	0	0	0	0	0	0	0	0	0	0	0	0	0	0	0	0	0	0	0	0	0
TUBB7P	2	2	0	0	0	3	0	1	0	2	1	0	4	0	0	0	0	0	0	0	0	0	0	0	0	0	2	0	0	0	0	0	0	0	2	3	1	0	0	0	0	0	0	4	0	0	0	0	0
MLLT10P2	0	0	0	0	0	0	0	0	0	0	0	0	0	0	0	0	0	0	0	0	2	0	0	0	0	0	0	0	0	0	0	0	0	0	0	0	0	0	0	0	0	0	0	0	0	0	0	0	0
FRG1	62	76	77	59	14	69	20	75	71	161	48	15	62	24	68	55	66	65	38	122	139	97	99	106	39	4	183	154	72	157	24	109	74	10	121	63	52	50	28	29	14	37	15	60	57	157	49	99	15
LINC01881	46	46	19	25	7	17	24	22	59	63	37	0	14	2	24	8	28	45	16	18	65	79	85	18	16	6	135	87	15	101	9	59	16	8	103	7	11	20	8	5	20	18	0	10	14	34	39	8	2
LINC01880	0	3	0	0	0	0	0	0	0	0	0	0	0	0	0	0	0	0	0	0	2	0	0	0	1	0	0	0	4	0	0	0	0	0	0	0	0	0	0	0	0	0	0	0	0	0	0	0	0
LOC105373980	12	0	0	2	0	0	0	2	0	0	0	0	0	0	0	4	4	2	0	4	0	2	2	0	2	12	5	1	0	4	0	2	0	2	10	0	0	0	0	0	0	2	0	0	0	0	6	2	0
LOC285097	0	0	0	0	0	0	2	10	2	20	2	0	0	0	0	5	4	6	3	16	6	33	6	0	2	8	4	5	0	6	0	2	2	2	34	2	0	0	0	0	0	0	0	4	0	0	6	0	0
LINC01238	6	0	6	0	8	0	0	2	10	61	0	0	15	0	4	0	10	6	6	0	113	137	16	16	6	8	27	6	0	39	1	2	12	0	135	8	0	0	2	2	0	2	0	8	8	0	2	0	0
LINC01237	0	0	0	0	0	0	0	5	0	21	0	0	10	0	0	0	3	7	9	2	18	44	5	3	4	4	10	2	0	12	0	0	13	0	32	0	0	0	0	0	0	0	0	2	0	2	0	0	0
LOC101926946	2	0	0	0	0	0	0	0	0	0	0	0	0	0	0	0	0	0	0	0	0	0	0	0	0	0	1	0	0	0	0	0	0	0	0	0	0	0	0	0	0	0	0	0	0	0	0	0	0
LOC105374866	0	0	0	0	0	0	0	0	0	0	0	0	0	0	0	0	0	0	0	0	0	0	0	0	0	0	0	0	0	0	0	0	0	0	0	0	0	0	0	0	0	0	0	0	0	0	0	0	0
LOC112268329	0	0	0	0	0	0	0	0	0	0	0	0	0	0	0	0	0	0	0	0	0	0	0	0	0	0	0	0	0	0	0	0	0	0	0	0	0	0	0	0	0	0	0	0	0	0	0	0	0
OR2G6	0	0	6	0	0	0	0	0	0	0	2	0	6	0	0	0	0	0	0	0	2	0	4	0	0	0	0	0	0	2	0	0	2	2	0	2	0	0	0	0	0	2	0	0	2	0	0	0	2
OR2AS2P	0	0	0	0	0	0	0	0	0	0	0	0	0	0	0	0	0	0	0	0	0	0	0	0	0	0	0	0	0	0	0	0	0	0	0	0	0	0	0	0	0	0	0	0	0	0	0	0	0
OR2T5	0	0	0	0	0	0	0	0	0	0	0	0	0	0	0	0	0	0	0	0	0	0	0	0	0	0	0	0	0	0	0	0	0	0	0	2	0	0	0	0	0	0	0	0	0	0	0	0	0
LOC105373277	0	0	0	0	0	0	0	0	0	0	0	0	0	0	0	0	0	0	0	0	1	0	0	0	0	0	0	0	0	0	0	0	3	0	0	0	0	0	0	0	0	0	0	0	0	0	0	0	0
OR2T3	0	0	0	0	0	0	0	0	0	0	2	0	4	0	0	0	2	0	0	0	0	0	0	0	0	0	0	0	0	0	0	0	0	0	0	0	0	0	0	0	0	0	0	0	0	0	0	0	0
LOC105373279	0	0	0	0	0	0	0	0	0	0	0	0	0	0	0	0	0	0	0	0	0	0	0	0	0	0	0	0	0	0	0	0	0	0	0	0	0	0	0	0	0	0	0	0	0	0	0	0	0
OR2T2	0	0	0	0	0	0	0	0	2	0	0	0	0	0	0	0	1	0	0	8	2	0	0	0	0	1	0	0	0	0	0	0	0	0	0	1	0	0	0	0	0	0	0	0	0	0	8	0	0
OR2T7	4	0	0	0	0	0	0	0	0	0	2	0	0	0	0	0	0	0	0	4	0	0	0	0	14	0	0	0	0	2	0	0	0	0	0	5	0	0	0	0	0	0	0	0	0	0	8	0	0
OR2T1	0	0	0	0	0	0	0	0	0	0	0	0	0	0	0	0	0	0	0	0	0	0	0	0	2	1	0	0	18	0	0	0	0	0	0	0	0	2	0	0	0	0	0	0	0	0	0	0	0
OR2T6	4	8	0	0	0	0	0	0	0	0	2	0	6	0	26	0	0	0	0	6	12	0	0	0	2	1	0	0	6	2	0	4	0	0	0	0	0	0	0	0	0	0	0	0	0	0	0	0	0
OR2T4	0	0	0	0	0	0	0	0	0	0	0	0	0	0	0	0	0	0	0	0	0	0	0	0	0	0	0	0	0	0	0	0	0	0	0	2	0	0	0	0	0	0	0	0	0	0	0	0	0
TBX22	0	0	0	0	0	0	0	2	0	0	0	0	0	0	18	0	0	0	0	8	2	0	0	0	0	6	0	0	0	0	0	8	1	0	0	0	0	0	0	4	4	0	0	0	1	0	0	0	0
LINC00685	27	4	0	0	1	9	4	2	63	72	10	0	2	2	0	4	1	13	8	0	46	123	49	14	25	72	188	107	0	73	0	6	11	0	153	0	5	2	0	2	0	0	0	0	10	60	4	12	0
APOBEC3A_B	0	0	0	0	0	0	0	0	0	0	0	0	0	0	0	0	0	0	0	0	0	0	0	0	0	0	0	0	0	0	0	0	0	0	0	0	0	0	0	0	0	0	0	0	0	0	0	0	0
LOC105373032	0	0	0	0	0	0	2	2	0	2	0	2	0	0	14	4	2	2	2	4	5	4	2	0	4	0	0	6	5	0	0	6	0	0	2	0	0	0	0	0	0	0	0	0	0	0	0	4	1
NCF4	92	42	246	122	43	114	49	85	43	174	58	2	143	45	93	181	49	113	50	191	350	329	171	172	188	96	83	115	71	136	132	155	226	155	78	71	160	40	64	42	34	74	26	54	148	20	62	80	32
NCF4-AS1	0	0	0	0	0	0	0	0	0	4	0	0	0	0	0	0	0	0	2	0	3	0	0	0	0	0	0	2	0	0	0	0	0	0	0	0	0	0	0	0	0	0	0	0	0	0	0	0	0
PVALB	4	0	1	6	0	6	0	8	0	0	0	0	0	0	0	0	4	0	0	3	0	4	4	0	2	0	0	0	16	0	2	0	10	0	2	0	4	0	0	0	0	0	0	0	0	0	10	0	0
NDUFA9P1	24	1	2	0	2	15	16	9	84	139	1	0	8	3	2	2	14	24	10	0	78	155	112	11	1	4	136	164	0	150	2	0	2	0	34	0	4	2	0	0	0	1	0	0	7	67	8	13	2
RPL41P3	0	0	0	0	0	0	0	0	0	1	0	0	0	0	0	0	0	0	0	0	0	0	0	0	0	0	1	0	0	1	0	0	0	0	1	0	0	0	0	0	0	0	0	0	0	0	0	0	0
RBFOX2	743	549	754	285	169	764	480	1103	1669	2753	732	42	1115	277	920	382	633	1147	401	1247	2665	4923	2553	866	1161	397	3335	2961	713	2550	143	986	822	210	1091	593	550	326	102	294	327	404	129	321	352	1419	693	549	39
APOL5	0	0	2	3	0	0	6	0	2	0	0	0	0	0	4	2	0	0	0	0	1	2	0	0	0	12	8	0	0	14	0	0	0	0	0	0	0	2	0	0	0	0	0	0	2	10	2	5	2
MRPS16P3	0	0	0	0	0	0	0	0	0	0	0	0	0	0	0	0	0	0	0	0	2	0	0	0	0	0	0	0	0	0	0	0	0	0	0	0	0	0	0	0	0	0	0	0	0	0	0	0	0
CABIN1	544	387	479	222	195	1244	304	1178	2181	4677	727	24	561	269	381	343	657	1687	370	591	2788	5824	2224	837	1210	910	7600	3721	454	3867	245	492	728	223	2513	560	455	484	146	133	100	263	81	169	675	4097	432	1074	66
GSTTP2	0	0	0	0	0	0	0	0	0	0	0	0	0	0	0	0	0	0	0	0	0	0	0	0	0	0	0	0	0	0	0	0	0	0	0	0	0	0	0	0	0	0	0	0	0	0	0	0	0
GSTT1	0	0	0	0	0	0	0	0	0	0	0	0	0	0	0	0	0	0	0	0	0	0	0	0	0	0	0	0	0	0	0	0	0	0	0	0	0	0	0	0	0	0	0	0	0	0	0	0	0
GSTT1-AS1	0	0	0	0	0	0	0	0	0	0	0	0	0	0	0	0	0	0	0	0	0	0	0	0	0	0	0	0	0	0	0	0	0	0	0	0	0	0	0	0	0	0	0	0	0	0	0	0	0
LOC391322	0	0	0	0	0	0	0	0	0	0	0	0	0	0	0	0	0	0	0	0	0	0	0	0	0	0	0	0	0	0	0	0	0	0	0	0	0	0	0	0	0	0	0	0	0	0	0	0	0
LOC100420769	0	0	0	0	0	0	0	0	0	0	0	0	0	0	0	0	0	0	0	0	0	0	0	0	0	0	0	0	0	0	0	0	0	0	0	0	0	0	0	0	0	0	0	0	0	0	0	0	0
EIF4EBP1P2	0	0	0	0	0	0	0	0	0	0	0	0	0	0	0	0	0	0	0	0	0	0	0	0	0	0	0	0	0	0	0	0	0	0	0	0	0	0	0	0	0	0	0	0	0	0	0	0	0
MTND1P13	0	0	0	0	0	0	0	0	0	0	0	0	0	0	0	0	0	0	0	0	0	0	0	0	0	0	0	0	0	0	0	0	0	0	0	0	0	0	0	0	0	0	0	0	0	0	0	0	0
GSTT4	0	0	0	0	0	0	1	2	0	0	2	0	0	0	0	0	0	0	0	0	0	4	0	0	2	0	1	0	0	0	0	0	0	0	0	0	0	0	0	0	0	0	0	0	0	4	0	0	0
GSTT2	0	0	4	0	2	3	0	2	22	12	2	0	4	0	0	0	2	8	4	12	7	40	9	4	0	4	4	23	0	0	2	10	4	6	2	0	0	0	0	2	0	2	0	0	6	0	10	0	0
DDT	70	31	47	0	4	6	7	39	71	52	30	2	64	49	19	10	60	66	9	34	32	31	35	25	47	30	203	152	54	44	7	21	35	26	55	21	16	20	5	4	6	12	5	4	7	53	7	15	8
DDTL	74	55	75	49	38	129	36	60	229	203	79	14	51	40	75	40	72	192	91	72	150	269	76	47	218	70	536	346	26	179	44	23	132	18	118	98	85	102	22	30	28	57	11	33	60	158	57	144	14
GSTT2B	6	6	2	2	6	0	2	5	9	12	2	0	8	6	0	2	4	4	7	24	30	39	6	16	4	16	9	26	4	4	4	6	0	12	2	0	2	6	0	6	0	8	0	1	2	1	18	2	0
LOC100652871	0	0	0	0	0	0	0	0	0	0	0	0	0	0	0	0	0	0	0	0	0	0	0	0	0	0	0	0	0	0	0	0	0	0	0	0	0	0	0	0	0	0	0	0	0	0	0	0	0
LOC100129358	8	2	0	6	0	25	2	2	3	173	2	0	16	3	16	0	4	0	7	3	83	93	92	0	8	11	0	0	0	289	0	2	6	0	31	0	0	10	0	2	0	0	0	0	6	0	6	16	0
LOC107985558	31	2	10	2	3	96	15	0	2	406	39	0	31	24	29	4	24	8	22	13	137	204	206	2	57	4	2	2	4	610	4	15	33	2	53	45	20	23	4	3	0	2	0	14	33	0	23	40	0
MIF	0	0	0	0	0	0	0	0	0	0	0	0	0	0	0	0	0	0	0	0	0	0	0	0	0	0	0	0	0	0	0	0	0	0	0	0	0	0	0	0	0	0	0	0	0	0	0	0	0
MIF-AS1	2	0	6	0	0	6	2	0	8	74	0	1	4	11	0	0	11	6	12	18	42	97	66	2	39	18	1	5	0	136	0	24	4	0	16	4	4	5	4	0	4	1	0	1	2	10	12	9	0
RN7SL268P	4	0	0	0	0	0	0	1	3	13	2	0	0	0	0	0	0	4	4	0	8	16	4	2	0	0	14	0	0	6	2	0	0	0	9	0	0	1	0	0	0	0	0	0	5	4	0	2	0
SLC2A11	28	5	22	11	2	20	14	24	8	79	23	0	9	10	4	8	44	40	42	63	158	159	88	59	30	30	92	67	45	98	18	11	44	6	105	28	32	14	8	10	2	9	10	8	32	72	20	22	6
DERL3	73	7	94	164	15	26	8	32	15	212	24	10	100	49	33	69	30	148	38	109	719	299	50	176	80	55	55	49	42	144	195	145	84	103	22	118	119	32	40	17	11	31	10	35	262	23	19	37	54
SMARCB1	209	196	306	261	90	421	95	382	665	860	328	13	347	96	254	270	366	525	133	339	1020	764	644	365	389	92	1247	1179	208	527	188	361	473	198	439	403	296	183	93	78	120	149	31	137	293	817	225	308	38
MMP11	18	2	21	8	14	8	0	30	20	122	6	0	45	14	10	4	16	7	13	48	221	568	179	44	34	34	77	50	26	106	8	3	46	21	65	0	6	12	6	12	2	4	2	6	6	8	0	8	0
LOC107985577	0	0	0	0	0	0	1	4	0	0	1	0	0	0	0	0	2	0	0	0	2	0	2	0	0	0	0	0	6	0	0	1	0	0	6	4	0	0	0	0	0	0	0	0	0	0	0	0	0
CHCHD10	90	108	181	99	48	347	49	150	582	637	468	15	428	111	253	192	415	941	103	434	230	362	314	327	186	95	2451	1099	112	537	190	183	338	123	379	324	211	189	97	46	130	91	61	55	124	842	111	318	25
C22orf15	0	0	2	0	0	10	0	14	38	102	0	0	4	2	0	0	8	26	0	15	31	12	13	10	0	30	128	104	2	60	0	0	0	0	22	4	4	0	0	0	0	1	0	0	4	73	2	3	0
LINC02557	0	0	0	0	0	0	0	2	0	0	0	0	2	0	0	0	0	0	0	0	0	0	0	0	2	0	0	2	0	6	0	14	0	0	0	0	0	0	0	0	0	0	0	0	4	0	0	0	0
LOC648771	0	0	0	0	0	0	0	0	0	0	0	0	0	0	0	0	0	0	0	0	0	0	0	0	0	0	0	0	0	0	0	0	0	0	0	0	0	0	0	0	0	0	0	0	0	0	0	0	0
FAM230I	2	0	0	0	2	0	0	0	0	0	0	0	0	0	0	0	2	0	0	0	2	2	2	0	0	0	0	0	0	0	0	0	5	0	0	2	0	0	0	0	0	0	0	0	1	0	2	0	0
LINC01659	0	0	0	0	0	0	0	0	0	2	0	0	0	0	0	0	2	1	0	1	0	0	0	0	0	0	0	2	0	0	0	12	2	2	0	1	0	0	0	0	0	0	0	0	0	0	0	0	1
LOC107985555	0	0	0	0	0	0	0	0	2	6	0	0	0	0	0	0	0	4	0	0	0	0	3	0	8	0	9	2	0	1	0	0	2	0	5	0	0	0	0	0	2	0	0	0	0	2	0	0	0
ZDHHC8P1	0	2	4	0	0	0	2	0	4	9	12	0	0	0	0	0	8	6	8	0	8	8	5	0	2	2	17	1	2	0	0	0	0	0	1	6	0	2	0	0	0	0	0	0	0	10	0	2	0
CES5AP1	0	0	0	0	0	0	0	0	0	0	2	0	0	0	0	0	0	0	0	0	1	0	0	0	0	3	0	0	0	0	0	0	0	0	0	0	0	0	0	0	0	0	0	0	0	0	0	0	0
LL22NC03-63E9.3	0	0	0	0	0	0	0	0	0	0	0	0	0	0	0	0	0	0	0	0	0	0	0	0	0	0	0	0	0	0	0	0	0	0	0	0	0	0	0	0	0	0	0	0	0	0	0	0	0
PRAME	0	0	0	0	0	0	0	0	0	0	0	0	0	0	0	0	0	0	0	0	0	0	0	0	0	0	0	0	0	0	0	0	0	0	0	0	0	0	0	0	0	0	0	0	0	0	0	0	0
LOC105379601	0	0	0	0	0	0	0	0	0	0	0	0	0	0	0	0	0	0	0	0	0	0	0	0	0	0	0	0	0	0	0	0	0	0	0	0	0	0	0	0	0	0	0	0	0	0	0	0	0
ZNF280A	0	0	0	0	0	0	0	0	0	0	0	0	0	0	0	0	0	0	0	0	0	0	0	0	0	0	0	0	0	0	0	0	0	0	0	0	0	0	0	0	0	0	0	0	0	0	0	0	0
LOC105379602	0	0	0	0	0	0	0	0	0	0	0	0	0	0	0	0	0	0	0	0	0	0	0	0	0	0	0	0	0	0	0	0	0	0	0	0	0	0	0	0	0	0	0	0	0	0	0	0	0
ZNF280B	0	0	0	0	0	0	0	0	0	0	0	0	0	0	0	0	0	0	0	0	0	0	0	0	0	0	0	0	0	0	0	0	0	0	0	0	0	0	0	0	0	0	0	0	0	0	0	0	0
LOC100736412	0	0	0	0	0	0	0	0	0	0	0	0	0	0	0	0	0	0	0	0	0	0	0	0	0	0	0	0	0	0	0	0	0	0	0	0	0	0	0	0	0	0	0	0	0	0	0	0	0
LOC105379603	0	0	0	0	0	0	0	0	0	0	0	0	0	0	0	0	0	0	0	0	0	0	0	0	0	0	0	0	0	0	0	0	0	0	0	0	0	0	0	0	0	0	0	0	0	0	0	0	0
LOC105379604	0	0	0	0	0	0	0	0	0	0	0	0	0	0	0	0	0	0	0	0	0	0	0	0	0	0	0	0	0	0	0	0	0	0	0	0	0	0	0	0	0	0	0	0	0	0	0	0	0
LOC102725003	0	0	0	0	0	0	0	0	0	0	0	0	0	0	0	0	0	0	0	0	0	0	0	0	0	0	0	0	0	0	0	0	0	0	0	0	0	0	0	0	0	0	0	0	0	0	0	0	0
LOC105379605	0	0	0	0	0	0	0	0	0	0	0	0	0	0	0	0	0	0	0	0	0	0	0	0	0	0	0	0	0	0	0	0	0	0	0	0	0	0	0	0	0	0	0	0	0	0	0	0	0
IGLV5-39	0	0	0	0	0	0	0	0	0	0	0	0	0	0	0	0	0	0	0	0	0	0	0	0	0	0	0	0	0	0	0	0	0	0	0	0	0	0	0	0	0	0	0	0	0	0	0	0	0
IGLV7-43	0	0	0	0	0	0	0	0	0	0	0	0	0	0	0	0	0	0	0	0	0	0	0	0	0	0	0	0	0	0	0	0	0	0	0	0	0	0	0	0	0	0	0	0	0	0	0	0	0
LOC102724999	0	0	0	0	0	0	0	0	0	0	0	0	0	0	0	0	0	0	0	0	0	0	0	0	0	0	0	0	0	0	0	0	0	0	0	0	0	0	0	0	0	0	0	0	0	0	0	0	0
IGLV5-45	0	0	0	0	0	0	0	0	0	0	0	0	0	0	0	0	0	0	0	0	0	0	0	0	0	0	0	0	0	0	0	0	0	0	0	0	0	0	0	0	0	0	0	0	0	0	0	0	0
SNORD159	0	0	0	0	0	0	0	2	5	11	0	0	0	0	12	0	0	0	0	0	15	23	10	1	0	0	25	8	0	8	0	2	0	0	2	0	0	0	0	0	0	0	0	0	1	10	0	2	0
LSS	201	81	160	97	68	553	57	327	612	1262	214	24	321	55	170	98	132	546	105	263	571	1027	489	474	296	148	3197	1052	216	857	112	249	304	41	506	442	129	270	62	89	38	96	40	79	112	1011	204	321	72
SPATC1L	53	26	18	24	4	28	42	41	62	89	80	2	147	37	92	34	26	17	24	82	145	416	183	26	169	24	140	137	29	86	38	80	38	27	148	22	28	20	12	16	10	18	4	14	62	77	54	14	8
FTCD-AS1	0	1	0	0	0	4	0	0	0	2	0	0	0	0	4	0	0	0	2	0	0	7	2	0	0	0	0	0	0	3	0	0	0	0	6	0	0	0	0	0	0	0	0	0	0	0	2	0	0
FTCD	11	1	0	0	0	0	8	9	26	28	2	0	5	2	2	2	9	10	6	0	49	149	55	4	19	8	43	27	20	27	0	8	5	2	545	0	2	0	0	0	0	0	0	4	4	5	9	6	2
GART	211	92	197	78	66	361	63	215	668	889	304	12	260	66	179	144	415	436	97	155	500	565	354	242	129	54	1129	1095	116	674	113	236	228	62	746	252	194	106	70	54	66	99	45	96	117	1192	188	303	34
DNAJC28	14	14	8	10	0	10	0	6	16	38	2	0	14	0	20	10	0	14	4	14	19	10	19	4	16	0	55	51	24	66	2	22	16	4	12	20	5	8	1	0	0	3	0	14	11	14	10	10	6
RPS5P3	0	0	0	0	0	0	0	0	2	4	0	0	0	0	8	0	1	0	0	0	2	0	4	0	0	0	0	0	0	0	0	0	0	0	0	0	0	0	0	0	0	0	0	0	2	0	0	2	0
TMEM50B	162	83	149	55	26	115	44	207	353	805	107	12	114	48	104	91	105	453	72	167	596	473	208	178	99	14	1034	737	152	923	87	205	124	69	625	53	65	97	38	48	41	101	24	94	62	551	75	101	20
IFNGR2	241	393	253	218	152	400	82	496	458	834	315	19	538	114	303	279	313	477	74	558	489	667	564	261	271	73	1609	994	585	1413	253	567	410	173	357	479	273	157	157	99	70	189	104	203	142	786	329	284	62
C21orf62	0	0	0	0	4	0	0	6	10	26	2	0	4	10	9	8	4	2	9	8	61	64	30	18	0	22	9	14	0	39	0	0	6	0	6	8	10	0	2	0	0	6	0	4	8	0	4	8	2
C21orf62-AS1	6	10	12	0	0	22	4	26	9	19	10	0	10	2	8	0	7	12	6	10	34	41	20	8	4	0	7	7	20	23	2	6	12	0	14	1	4	2	2	0	0	2	0	4	6	2	8	4	0
PAXBP1	393	63	202	54	33	411	81	347	633	918	147	5	110	70	72	129	176	280	74	360	626	761	483	182	390	82	1479	1283	110	861	93	138	109	57	730	98	119	197	22	67	51	87	20	53	141	732	83	266	10
RNU4-45P	0	0	0	0	0	0	0	0	0	0	0	0	0	0	0	0	0	0	0	0	1	0	0	0	0	0	0	0	0	0	0	0	0	2	0	0	0	0	0	0	0	0	0	0	0	0	0	0	0
LOC100420035	0	0	0	0	0	0	0	0	0	0	0	0	0	0	0	0	0	0	0	0	0	0	0	0	0	0	0	0	0	0	0	0	0	0	0	0	0	0	0	0	0	0	0	0	0	0	0	0	0
LOC105379618	0	0	0	0	0	0	0	0	0	0	0	0	0	0	0	0	0	0	0	0	0	0	0	0	0	0	0	0	0	0	0	0	0	0	0	0	0	0	0	0	0	0	0	0	0	0	0	0	0
LINC00308	0	0	0	0	0	0	0	0	0	0	0	0	0	0	0	0	0	0	0	0	0	0	1	0	0	0	0	0	0	0	0	0	0	0	0	0	0	0	0	0	0	0	0	0	0	0	0	0	0
LOC100134423	0	0	0	0	0	0	0	0	0	0	0	0	0	0	0	0	0	0	0	0	0	0	0	0	0	0	0	0	0	0	0	0	0	0	0	0	0	0	0	0	0	0	0	0	0	0	0	0	0
BTG3-AS1	1	0	6	0	0	6	0	0	19	56	2	0	0	18	0	3	4	10	0	0	8	32	4	4	2	0	96	58	10	37	1	0	6	0	26	0	2	6	0	0	0	2	0	0	0	20	6	5	0
BTG3	21	28	17	12	5	69	4	21	88	181	17	0	41	22	10	9	38	38	4	34	58	99	24	56	9	0	282	142	14	152	12	24	31	19	99	21	18	27	7	6	2	11	2	15	14	97	12	40	2
LOC107987418	0	0	0	0	0	0	0	0	0	0	0	0	0	0	0	0	0	0	0	0	0	0	0	0	0	0	0	0	0	0	0	0	0	0	0	0	0	0	0	0	0	0	0	0	0	0	0	0	0
NEK4P1	0	0	0	0	0	0	0	0	0	0	0	0	0	0	0	0	0	0	0	0	4	4	0	0	0	0	0	0	0	0	0	0	0	0	0	0	0	0	0	0	0	0	0	0	0	0	0	0	0
LOC107985511	6	0	0	0	0	0	2	0	0	2	0	0	4	0	6	1	0	0	0	0	0	6	8	0	4	0	0	0	0	0	0	0	0	0	0	0	0	4	0	0	0	0	0	0	0	0	0	0	0
PCMTD2	238	185	264	110	60	262	122	261	335	706	210	4	237	78	154	115	189	215	117	217	793	705	685	220	259	36	659	505	226	756	115	272	294	84	1037	208	129	103	52	37	48	87	34	166	88	431	217	241	24
MYT1	20	12	4	1	0	4	6	8	12	24	6	4	5	0	11	0	10	7	0	2	4	31	0	0	10	0	33	17	10	4	0	27	14	0	11	4	14	8	0	2	2	0	0	4	4	32	23	6	0
LOC105372727	0	0	0	0	0	0	0	2	0	0	9	0	0	0	2	3	0	1	0	136	1	23	0	0	2	111	0	0	2	0	0	0	63	2	0	0	0	0	0	0	0	0	0	0	2	0	74	1	1
NPBWR2	12	0	0	0	0	0	1	5	1	1	2	0	0	2	0	0	1	3	0	1	2	3	2	0	8	4	5	2	2	1	0	0	1	0	1	0	0	0	0	0	0	0	0	0	1	1	5	0	2
OPRL1	8	2	10	4	2	0	8	3	6	12	6	0	14	2	0	2	10	8	2	13	37	56	37	10	10	10	4	7	6	12	2	13	19	4	12	15	11	2	0	2	2	2	4	4	6	0	4	2	2
KCNQ2-AS1	0	6	0	0	0	0	0	6	0	0	0	0	2	0	0	0	0	0	0	0	0	0	0	0	1	0	0	0	0	0	0	0	0	0	0	0	4	0	0	0	0	0	0	0	0	0	2	0	0
LOC105372721	0	0	0	0	0	0	0	0	0	0	0	0	0	0	0	0	0	0	0	1	0	0	0	0	0	0	0	0	0	0	0	0	0	0	0	0	3	0	0	0	0	0	0	0	0	0	0	0	0
KCNQ2	18	0	0	4	0	0	4	2	8	1	2	0	4	1	0	10	35	8	0	0	10	6	8	0	29	12	10	0	16	0	0	6	1	10	0	3	2	2	4	0	0	0	2	0	2	74	1	2	0
LOC105372704	22	0	2	2	4	6	4	26	49	100	0	0	2	2	2	0	6	65	4	8	76	98	37	23	40	0	182	112	0	132	0	6	0	0	162	2	2	14	0	6	0	4	0	2	14	66	12	12	0
TAF4	323	162	173	85	34	317	52	238	571	739	262	6	183	73	120	87	124	731	81	244	344	513	349	171	230	43	1687	899	190	828	86	255	183	94	1455	188	121	135	32	77	56	55	30	68	160	498	159	216	22
MIR1257	2	0	0	0	0	4	0	0	0	2	0	0	0	0	0	0	0	0	0	0	0	7	0	0	0	0	0	0	0	2	0	0	0	0	4	4	0	0	0	0	0	0	0	0	0	0	0	0	0
CDH4	4	10	3	0	0	4	0	6	24	38	7	0	8	4	0	8	0	16	0	4	22	37	12	2	19	24	87	12	0	52	0	9	3	0	183	0	2	2	4	4	0	0	0	0	3	25	22	9	0
LOC107985440	6	0	0	0	0	0	0	0	6	0	2	0	4	3	0	0	0	0	0	4	4	0	0	2	0	0	1	0	0	2	0	0	0	0	17	2	0	0	0	0	0	0	0	0	0	0	0	0	0
LOC107987425	0	0	0	0	0	0	0	0	0	0	0	0	0	0	0	0	0	0	0	0	0	0	0	0	0	0	0	0	0	0	0	0	0	0	0	0	0	0	0	0	0	0	0	0	0	0	0	0	0
PCAT19	28	6	16	2	2	44	16	28	36	66	4	0	28	7	20	9	29	39	13	25	141	134	140	17	20	0	30	59	12	30	4	29	20	6	58	10	4	6	0	2	4	32	2	8	9	2	8	7	6
TPM3P5	135	35	113	48	8	87	21	62	103	127	73	9	106	19	74	67	95	146	29	129	43	11	50	125	24	0	214	181	66	86	51	68	60	44	189	122	62	111	32	57	29	90	30	81	53	367	49	86	26
PLEKHA3P1	5	11	32	8	3	12	11	9	11	14	9	2	9	5	26	8	4	25	5	22	30	27	25	12	25	2	26	67	6	21	6	14	12	6	21	11	8	15	1	7	7	12	5	22	6	20	26	8	6
LINC01480	37	0	10	4	0	16	6	0	6	37	0	0	18	4	0	8	4	14	0	23	71	39	12	13	0	20	8	0	0	10	14	19	6	6	12	32	34	3	10	2	3	2	0	18	7	0	2	12	0
LOC110467527	0	2	0	2	0	0	0	0	6	14	0	0	0	1	2	2	8	8	0	1	45	30	6	0	0	8	2	0	0	3	0	2	7	0	2	6	0	3	0	0	0	6	0	0	4	0	0	0	2
CEACAM21	17	8	30	30	4	17	7	10	10	98	11	0	45	15	13	28	4	26	13	35	200	135	50	40	9	7	29	9	20	105	23	29	41	42	36	21	23	2	3	8	4	11	0	19	49	2	11	2	8
CEACAMP3	0	0	0	0	0	0	0	0	0	0	0	0	0	0	0	0	0	0	0	0	0	0	0	0	0	0	0	0	0	0	0	0	0	0	0	0	0	0	0	0	0	0	0	0	0	0	0	0	0
DNAJC19P2	0	0	0	0	0	0	0	0	0	0	0	0	0	0	0	0	0	0	0	0	0	0	0	0	0	0	0	0	0	0	0	0	0	0	0	0	0	0	0	0	0	0	0	0	0	0	0	0	0
LOC105372404	6	0	0	0	0	0	0	0	2	8	0	0	0	0	6	0	0	2	0	6	8	14	0	5	8	0	0	0	0	4	0	2	0	0	0	0	0	0	0	0	0	0	0	0	2	2	3	0	0
CEACAM4	0	0	4	12	0	0	0	0	0	2	0	0	0	0	4	6	6	8	0	4	2	8	10	0	7	6	0	0	18	3	6	0	0	2	6	4	9	0	0	0	0	2	4	2	4	4	0	0	5
DNAJC19P3	0	0	0	0	0	0	0	0	2	0	2	0	0	0	0	0	0	0	0	0	0	0	0	0	0	0	2	0	2	0	0	0	0	0	0	0	0	0	0	0	0	0	0	0	0	0	0	0	0
LOC105372405	0	0	0	0	0	0	0	6	0	2	0	0	0	0	6	0	0	3	0	0	0	0	0	0	2	0	2	0	0	0	0	0	0	0	0	3	2	0	0	0	0	0	0	0	0	0	0	0	0
CEACAM7	36	2	2	14	0	4	4	17	8	71	6	1	14	0	4	0	4	1568	0	18	3	4	2	0	2	0	146	23	24	1888	5	28	6	0	403	34	44	4	0	0	0	4	18	16	4	6	34	4	4
GPI	1152	734	977	611	228	1984	278	1396	4042	4442	2098	41	1508	395	755	813	2314	4125	330	1235	1472	1584	1663	1668	691	313	10784	7054	867	1846	616	969	1241	550	3680	1332	1261	664	279	249	452	377	234	391	486	5540	592	1741	146
GARRE1	162	130	88	51	30	161	112	182	347	620	98	4	190	54	81	72	137	239	91	140	851	1119	821	156	257	118	708	460	51	636	39	163	143	54	454	118	58	60	42	42	45	76	14	49	122	267	100	170	20
RPL29P33	0	0	0	0	0	0	0	0	0	6	0	0	1	2	0	0	2	2	0	1	12	10	6	2	0	0	4	2	0	8	0	2	2	0	6	0	0	0	0	0	0	4	0	0	0	6	0	2	0
LSM14A	1046	594	726	452	170	1033	326	918	1427	1786	766	34	1062	258	808	510	712	952	337	1305	1598	1848	1470	709	831	207	2301	2507	782	1913	394	1223	832	394	1498	1015	508	346	203	256	247	390	126	503	568	1333	667	700	103
ZNF92P2	0	0	0	0	0	0	0	0	0	0	0	0	0	0	0	0	0	0	0	0	0	0	0	0	0	0	0	0	0	4	0	0	0	0	0	0	0	0	0	0	0	0	0	0	0	0	0	0	0
PCGF7P	2	11	11	1	0	0	8	3	6	21	0	1	12	0	4	4	14	5	4	19	21	16	12	12	10	0	14	11	2	12	0	7	11	6	3	9	3	3	2	4	0	4	0	2	0	11	9	2	0
MTDHP5	1	0	0	0	0	0	0	0	4	0	0	0	0	0	4	0	0	0	0	0	0	0	0	0	0	0	0	0	1	0	0	0	0	0	0	2	0	0	0	0	0	0	0	0	0	0	0	0	0
VN1R85P	2	4	0	0	0	0	0	0	0	2	0	0	0	0	2	0	0	0	2	0	4	5	5	0	0	0	0	0	0	0	0	0	0	0	0	0	0	0	0	0	0	0	0	0	2	0	0	0	0
ZNF676	14	15	2	0	6	6	0	8	7	38	0	0	2	4	2	6	4	8	12	16	24	93	95	16	10	10	33	16	0	27	1	0	8	0	24	4	8	6	0	2	2	0	0	0	5	1	11	0	0
BNIP3P30	1	0	0	0	0	0	0	0	0	12	2	0	3	0	0	0	5	2	2	7	15	7	2	1	0	0	2	2	0	2	0	2	0	0	4	0	0	0	0	0	0	0	0	0	0	1	0	0	0
LOC105372328	0	0	0	0	0	0	0	0	0	0	0	0	0	0	0	0	2	0	0	0	0	0	0	0	0	0	0	0	0	0	0	4	0	0	0	0	0	0	0	0	0	0	0	0	0	0	0	0	0
LOC107985324	2	0	0	4	0	0	0	0	0	0	0	0	2	0	0	0	0	0	0	0	0	0	0	0	0	0	0	0	0	0	0	0	0	0	0	0	0	0	0	0	0	0	0	0	0	0	0	0	0
BNIP3P31	0	0	0	0	0	0	0	2	0	0	2	0	0	0	0	0	0	2	0	0	0	0	0	0	0	0	0	0	0	1	0	0	0	2	0	0	0	0	0	0	0	0	0	0	0	0	0	0	0
ZNF43	115	50	56	79	39	20	41	80	84	303	29	4	38	14	61	51	63	134	68	79	488	651	404	87	102	49	89	197	31	187	39	93	130	49	967	29	20	8	17	21	15	23	15	59	71	14	145	20	14
BRI3BPP1	0	0	0	0	0	0	0	0	0	2	0	0	0	0	0	0	2	0	0	0	2	0	4	0	8	5	2	0	0	0	0	0	0	0	4	0	0	0	0	0	0	0	0	0	0	0	0	0	0
CCNYL6	2	0	0	2	0	8	4	7	24	33	1	0	4	2	0	2	11	24	2	0	77	68	22	4	0	8	75	46	0	138	0	0	3	2	47	2	1	0	0	0	0	10	0	0	0	46	0	4	0
ZNF100	66	40	42	46	14	69	24	46	153	115	25	4	32	10	34	75	25	86	25	34	338	163	114	26	65	50	338	251	23	410	26	45	40	22	156	49	26	15	24	12	10	16	2	16	50	90	28	36	10
VN1R84P	0	2	0	0	0	0	4	0	0	0	0	0	2	0	0	0	0	2	0	0	26	0	0	0	0	3	16	4	1	8	0	0	0	2	0	0	0	0	0	0	0	0	0	0	0	0	0	0	0
MTDHP4	0	0	0	0	0	0	0	0	0	0	0	0	0	0	0	0	1	0	0	0	6	0	0	0	0	0	4	2	0	9	0	2	0	0	0	0	0	0	0	0	0	0	0	0	0	0	0	0	0
MTDHP3	0	0	0	0	0	0	0	0	0	0	0	0	2	0	0	0	0	2	0	0	1	4	8	0	0	4	0	2	0	0	0	2	0	0	0	0	0	0	0	0	4	2	0	0	0	0	6	0	2
LOC400682	0	4	0	0	0	0	0	0	0	4	0	0	0	0	4	2	0	1	5	4	2	2	2	0	4	0	6	0	0	1	0	2	0	0	4	0	1	0	0	2	0	1	0	2	0	0	4	0	0
ZNF430	31	40	49	34	27	75	29	65	95	202	51	0	66	16	44	56	43	93	33	78	198	154	125	58	70	34	287	298	22	279	36	105	79	15	155	39	39	33	32	21	12	27	16	58	45	275	92	95	13
LOC112268247	0	0	0	0	0	0	0	0	0	0	0	0	0	0	0	0	0	0	0	0	2	0	0	0	0	0	0	0	0	0	0	0	0	0	0	0	0	0	0	0	0	0	0	0	0	2	0	0	0
KRT18P40	0	0	0	0	0	0	0	0	0	0	0	0	0	0	0	0	4	0	0	0	0	0	4	0	0	4	2	0	0	0	0	0	0	0	0	0	0	0	0	0	0	0	0	1	0	0	0	1	0
ZNF85	52	16	34	26	14	18	3	40	32	47	13	0	29	7	32	14	13	12	12	71	84	76	159	19	14	16	24	34	6	36	15	46	29	14	172	8	8	8	12	16	6	18	8	16	38	4	27	18	8
LOC100418993	0	6	2	0	0	0	0	0	0	0	0	0	0	0	0	0	0	0	0	2	0	0	0	6	0	0	0	0	7	0	0	0	0	0	0	0	0	0	0	0	0	0	0	0	0	0	0	0	0
LOC100418992	0	0	0	0	0	0	0	0	0	0	0	0	0	0	0	0	0	0	0	0	0	0	6	0	0	0	0	0	0	0	0	0	0	0	0	0	0	0	0	0	0	0	0	0	0	0	0	0	0
LOC100418991	0	0	0	0	0	0	0	0	0	0	0	0	0	0	0	0	0	0	0	0	0	0	0	0	0	0	0	0	0	0	0	0	0	0	0	0	0	0	0	0	0	0	0	0	0	0	0	0	0
LOC100418990	0	0	0	0	0	0	4	0	0	0	0	0	0	0	0	0	0	0	0	0	0	0	0	0	0	0	2	0	0	0	0	0	0	0	0	0	0	0	0	0	0	0	0	0	0	0	0	0	0
LOC100418989	0	0	0	2	0	0	0	0	0	0	4	0	0	0	0	0	0	0	0	0	1	0	0	0	2	0	0	0	0	0	0	0	0	0	0	0	0	0	0	0	0	0	0	0	0	2	1	0	0
LOC100418988	0	0	0	0	0	0	0	0	0	0	0	0	0	0	0	0	0	0	0	0	0	0	0	0	0	0	0	0	0	0	0	0	0	0	0	0	0	0	0	0	0	0	0	0	0	0	0	0	0
LOC100418987	0	0	0	0	0	0	0	0	0	0	0	0	0	0	0	0	0	0	0	2	2	0	0	0	0	0	0	0	0	0	0	0	0	0	0	0	0	0	0	0	0	0	0	0	3	0	0	0	0
LOC100418986	0	0	0	0	0	0	0	0	0	0	0	0	0	0	0	0	0	0	0	0	0	0	0	0	1	0	0	0	0	0	0	0	0	0	0	0	0	0	0	0	0	0	0	0	0	0	4	0	0
BNIP3P24	0	0	0	0	0	0	0	2	6	7	0	0	0	3	0	0	0	0	0	0	6	2	0	0	0	0	2	0	0	16	0	0	0	0	17	0	0	0	0	0	0	0	0	0	0	3	0	0	0
ZNF66	69	30	18	19	12	36	14	34	121	195	18	0	60	11	37	9	18	50	10	32	206	192	244	20	26	35	223	238	2	269	9	53	34	4	826	17	16	6	2	6	13	14	1	21	24	126	10	14	2
VN1R79P	0	0	0	0	0	0	0	0	4	0	0	0	0	0	0	0	0	0	0	0	4	0	0	0	0	0	0	0	0	0	0	0	0	4	0	0	0	0	0	0	0	0	0	0	0	0	2	0	0
LOC100533638	0	0	0	0	0	0	0	0	0	2	0	0	0	0	0	0	0	0	0	2	2	0	0	0	0	0	2	1	0	0	0	0	0	0	0	0	0	6	0	0	0	0	0	0	1	1	2	0	0
LOC105372319	0	0	0	0	0	0	4	4	4	0	0	0	0	0	0	0	0	0	0	16	0	0	0	0	2	6	0	0	0	0	0	0	0	0	2	0	0	0	0	0	0	0	0	0	0	0	0	0	0
SBNO2	693	114	323	221	119	779	188	687	1736	2333	584	20	425	187	267	208	779	1950	140	334	1059	4530	1276	347	893	562	5024	3312	276	2533	238	470	790	220	2973	460	708	446	118	108	44	143	62	106	410	1523	269	629	53
MED16	188	152	183	102	49	386	107	531	1163	1149	441	14	317	126	172	128	271	1152	103	234	695	1561	745	275	544	334	3346	2109	129	1283	133	295	283	94	852	395	229	209	55	70	63	126	37	52	160	974	250	302	16
CFD	44	36	124	58	38	68	120	170	102	220	28	14	60	20	89	26	20	71	56	176	87	630	288	60	221	246	85	168	170	89	57	207	651	56	208	102	38	61	42	51	22	42	18	42	41	42	68	42	18
ELANE	2	0	4	2	2	9	2	2	14	2	0	0	2	6	1	6	4	13	2	0	10	46	15	2	6	0	14	10	10	4	0	0	6	2	1	43	8	2	2	2	0	2	4	0	0	0	0	6	1
PRTN3	0	0	0	0	0	0	0	4	0	0	4	0	2	0	2	8	2	2	0	0	0	2	0	0	2	0	2	0	0	0	0	0	0	0	0	19	4	0	0	0	0	0	0	0	0	0	0	0	4
AZU1	0	0	0	0	0	2	0	0	0	0	2	0	0	2	0	19	2	4	0	6	0	5	4	0	0	0	0	1	0	2	4	0	4	4	0	50	28	0	0	0	0	3	0	0	0	0	0	0	2
CTDP1	201	82	200	55	40	333	73	250	608	801	250	23	229	92	149	109	219	472	80	132	404	656	371	184	417	320	1326	1088	150	931	72	198	243	57	410	270	266	162	68	75	56	130	23	61	178	808	131	270	24
CTDP1-DT	0	0	0	0	0	4	0	0	0	6	0	0	0	0	0	0	0	1	0	0	0	2	0	0	0	6	0	0	0	0	0	0	0	0	2	0	4	0	0	0	0	0	0	0	0	0	0	2	0
LOC284240	1	0	0	0	0	0	0	0	0	4	0	0	0	0	0	2	2	2	0	2	8	6	0	0	6	4	4	5	0	4	0	0	0	4	2	1	0	0	0	0	0	0	0	0	0	0	14	0	0
DSEL	126	118	52	23	44	68	96	96	179	310	48	6	130	29	117	53	28	31	85	228	645	1091	470	146	182	14	142	281	118	397	10	230	106	17	147	77	12	29	8	30	54	38	11	50	27	6	74	30	2
LOC100422053	0	0	0	0	0	0	0	0	2	0	0	0	0	0	0	0	0	0	0	0	2	0	0	0	0	0	0	0	0	0	0	0	0	0	0	0	0	0	0	0	0	0	0	0	0	0	0	0	0
RPLP0P11	0	0	0	0	0	0	0	0	0	0	0	0	0	0	0	0	4	0	0	0	0	0	0	0	0	0	0	2	2	0	0	0	0	0	0	0	0	0	0	0	0	0	0	0	0	0	0	0	0
LOC105372115	0	0	0	2	0	0	0	0	0	0	0	0	0	0	2	0	0	0	0	6	8	0	0	0	0	18	0	0	0	2	0	2	0	3	4	4	8	0	0	0	0	0	0	2	4	0	0	0	0
SKA1	25	24	18	22	0	26	7	27	116	67	16	0	22	5	46	44	111	17	0	11	22	26	19	39	2	0	47	190	10	7	11	26	19	10	126	8	30	8	11	11	20	5	2	6	30	85	12	26	12
LOC105372114	0	6	0	0	0	0	0	0	0	0	0	0	0	0	0	0	0	0	0	0	2	0	0	0	0	0	0	0	0	0	0	0	0	2	0	0	0	0	0	0	0	0	0	0	0	0	0	0	0
RNA5SP458	0	0	0	0	0	0	0	0	0	0	0	0	2	0	0	0	0	0	0	0	0	0	0	0	0	0	0	0	0	0	0	0	0	0	0	0	0	0	0	0	0	0	0	0	0	0	0	0	0
TBCD	567	176	198	135	97	372	275	429	1125	1905	311	20	479	108	281	187	347	1016	303	313	2217	3806	1895	377	632	382	2094	1785	301	1923	114	359	404	150	2353	175	270	193	63	102	76	263	28	125	278	1244	307	384	40
B3GNTL1	27	10	8	8	2	11	10	11	104	120	24	2	12	6	18	6	19	37	4	7	92	186	98	13	28	0	98	255	6	93	18	6	18	4	158	13	17	8	0	2	8	14	2	10	35	120	14	17	4
METRNL	77	88	94	48	18	311	28	344	643	777	245	4	173	91	77	73	164	849	36	136	183	584	200	147	137	77	2400	1180	111	1085	64	267	101	59	647	250	179	127	36	41	49	83	14	52	38	612	75	176	28
SEPTIN9	1770	1262	1997	1146	518	2490	993	2844	7051	7550	2125	124	3565	647	1970	1287	2227	12205	910	3010	4150	7801	5092	2461	2938	966	12900	11821	1959	4901	1249	2443	3630	1096	8001	2702	2043	1278	727	684	740	871	336	710	1605	5279	1777	2015	366
LOC107984143	0	0	0	0	0	0	0	0	0	0	0	0	0	0	0	0	0	0	0	0	0	0	0	0	0	0	0	0	0	0	0	0	0	0	0	0	0	0	0	0	0	0	0	0	0	0	0	0	0
SEPTIN9-DT	0	0	2	6	2	2	0	12	91	76	10	0	0	2	12	0	6	71	0	5	8	34	0	0	28	0	310	137	2	67	0	0	14	0	33	0	4	6	0	14	0	0	0	0	0	29	0	2	0
LACAT1	3	0	0	0	0	2	0	6	83	63	2	0	0	0	2	0	4	28	0	0	4	10	2	3	0	0	116	122	15	50	0	0	4	0	10	0	2	0	0	0	0	2	0	0	0	34	0	2	0
MYL6P5	0	0	0	0	0	0	0	0	2	5	0	0	0	0	1	0	1	3	0	0	2	0	1	0	0	2	2	2	0	0	0	1	0	0	0	0	0	0	0	0	0	0	0	0	1	1	0	0	0
RDM1P4	0	0	0	0	0	0	0	0	0	0	0	0	0	0	0	0	0	0	0	0	0	0	0	0	0	0	0	0	0	0	0	0	0	0	0	0	0	0	0	0	0	0	0	0	0	0	0	0	0
LOC107984156	0	0	0	0	0	0	0	0	0	0	0	0	0	0	0	0	0	0	0	0	0	0	0	0	0	0	0	0	0	0	0	0	0	0	0	0	0	0	0	0	0	0	0	0	0	0	0	0	0
LOC100294336	0	0	0	0	0	0	0	0	0	0	0	0	0	0	0	0	0	0	0	0	0	0	0	0	0	0	0	0	0	0	0	0	0	0	0	0	0	0	0	0	0	0	0	0	0	0	0	0	0
LOC101929775	0	0	0	0	0	0	0	0	0	0	0	0	0	0	0	0	0	0	0	0	0	0	0	0	0	0	0	0	0	0	0	0	0	0	0	0	0	0	0	0	0	0	0	0	0	0	0	0	0
LOC107984142	0	0	0	0	0	0	0	0	0	0	0	0	0	0	0	0	0	0	0	0	0	0	0	0	0	0	0	0	0	0	0	0	0	0	0	0	0	0	0	0	0	0	0	0	0	0	0	0	0
LOC112268319	0	0	0	0	0	0	0	0	0	0	0	0	0	0	0	0	0	0	0	0	0	0	0	0	0	0	0	0	0	0	0	0	0	0	0	0	0	0	0	0	0	0	0	0	0	0	0	0	0
LOC100996747	0	0	0	0	0	0	0	0	0	0	0	0	0	0	0	0	0	0	0	0	0	0	0	0	0	0	0	0	0	0	0	0	0	0	0	0	0	0	0	0	0	0	0	0	0	0	0	0	0
LOC100996745	0	0	0	0	0	0	0	0	0	0	0	0	0	0	0	0	0	0	0	0	0	0	0	0	0	0	0	0	0	0	0	0	0	0	0	0	0	0	0	0	0	0	0	0	0	0	0	0	0
LOC105371801	0	0	0	0	0	0	0	0	0	0	0	0	0	0	0	0	0	0	0	0	0	0	0	0	0	0	0	0	0	0	0	0	0	0	0	0	0	0	0	0	0	0	0	0	0	0	0	0	0
LOC105371799	0	0	0	0	0	0	0	0	0	0	0	0	0	0	0	0	0	0	0	0	0	0	0	0	0	0	0	0	0	0	0	0	0	0	0	0	0	0	0	0	0	0	0	0	0	0	0	0	0
RN7SL656P	0	0	0	0	0	0	0	0	0	0	0	0	0	0	0	0	0	0	0	0	0	0	0	0	0	0	0	0	0	0	0	0	0	0	0	0	0	0	0	0	0	0	0	0	0	1	0	0	0
LRRC37A	9	5	14	11	0	26	4	3	28	53	5	2	2	14	0	8	10	23	9	24	87	112	7	12	48	6	80	57	15	86	4	6	8	10	83	14	6	4	0	2	4	2	0	2	14	60	45	32	8
LOC107987254	2	0	0	2	0	12	12	6	25	26	0	0	6	4	4	0	6	14	2	4	40	31	10	8	12	0	90	35	0	71	2	2	2	0	30	2	0	0	0	0	0	0	0	0	10	36	4	0	0
LOC100996709	0	0	0	0	0	0	0	0	0	0	0	0	0	0	0	0	0	0	0	0	0	0	0	0	0	0	0	0	0	0	0	0	0	0	0	0	0	0	0	0	0	0	0	0	0	0	0	0	0
NSFP1	0	2	0	1	0	14	0	38	0	29	0	0	1	0	28	0	1	18	6	0	4	2	0	0	0	0	108	31	6	17	0	16	0	0	23	15	2	20	0	14	0	19	10	0	1	43	6	0	0
LOC101929774	0	0	0	0	0	0	0	0	0	0	0	0	0	0	0	0	0	0	0	0	0	0	0	0	0	0	0	0	0	0	0	0	0	0	0	0	0	0	0	0	0	0	0	0	0	0	0	0	0
KRTAP16-1	0	2	0	0	0	0	0	0	0	4	2	0	0	0	0	2	0	0	0	0	2	0	0	0	0	2	0	4	0	0	0	0	0	0	0	0	0	0	0	0	0	0	0	0	2	1	0	0	0
KRTAP17-1	0	0	0	0	0	0	0	0	0	0	0	0	0	0	0	0	0	0	0	0	0	0	4	0	0	0	0	0	0	0	0	0	0	0	0	0	2	0	0	0	0	0	0	0	2	0	0	0	2
TBC1D3P7	2	2	0	0	0	0	4	0	0	0	4	0	0	0	12	0	0	2	0	0	2	0	0	0	0	2	0	0	0	0	0	0	2	2	0	0	2	4	0	0	0	2	0	0	2	2	0	0	4
KRT33A	0	0	0	2	0	0	0	0	0	0	0	0	0	0	0	4	0	0	0	0	0	0	0	0	1	0	0	0	12	0	0	6	0	0	0	4	2	0	0	0	0	0	0	0	0	0	4	0	0
LOC105371778	0	0	0	0	0	0	0	1	0	0	0	0	4	0	0	0	0	0	0	0	2	0	0	0	0	4	0	0	0	0	0	0	0	0	0	0	0	0	0	0	0	0	0	0	0	0	0	0	0
KRT33B	0	0	4	0	0	0	0	0	0	0	4	0	0	0	0	0	0	1	0	0	0	0	0	0	0	0	0	0	14	0	0	0	0	0	0	2	0	0	0	0	0	0	0	0	0	0	0	0	0
KRT34	0	0	0	2	2	0	2	0	4	2	0	0	0	0	0	0	0	0	0	2	0	0	0	0	0	0	0	0	0	0	0	0	0	0	0	2	2	0	0	0	0	0	0	0	0	0	0	6	2
LOC100653049	0	0	0	0	0	0	0	0	0	0	0	0	0	0	0	0	0	0	0	0	0	0	0	0	0	0	0	0	0	0	0	0	0	0	0	0	0	0	0	0	0	0	0	0	0	0	0	0	0
KRT31	0	0	0	0	0	0	0	0	0	0	2	0	0	0	0	4	0	0	0	0	0	0	0	0	0	4	0	0	0	0	0	0	0	4	0	0	0	0	0	0	0	0	0	0	0	0	0	0	0
KRT41P	0	5	0	1	0	0	0	4	0	0	0	0	0	0	0	4	0	0	0	0	0	0	0	0	0	0	2	0	0	0	0	0	0	0	0	0	0	0	0	0	0	0	0	0	2	0	0	0	0
LOC100505782	0	0	0	0	0	0	0	0	0	0	0	0	0	0	0	0	1	0	0	4	0	0	0	0	0	0	0	4	0	0	0	0	0	0	0	0	0	0	0	0	0	0	0	0	0	0	0	0	0
KRT37	0	0	0	0	0	0	0	8	0	0	4	0	0	0	0	0	0	0	0	0	0	0	0	0	0	0	0	1	2	0	0	0	0	0	0	0	0	0	0	0	0	0	0	0	0	0	0	4	0
KRTAP9-3	6	0	0	0	0	0	0	0	0	0	0	0	0	0	0	0	2	0	0	0	0	0	0	0	0	2	0	0	0	0	0	0	0	0	0	0	0	0	0	0	0	0	0	0	0	0	0	0	0
KRTAP9-8	0	0	0	2	0	0	0	2	0	0	0	0	0	0	0	0	0	0	0	0	0	0	0	0	0	0	0	0	0	0	0	0	0	0	0	0	0	0	0	0	0	0	0	0	0	0	0	0	0
KRTAP4-12	0	0	0	0	0	0	0	0	0	0	0	0	0	0	0	4	0	0	0	0	0	0	0	0	0	0	0	0	0	0	0	0	0	0	2	0	0	0	0	0	0	0	0	0	0	0	0	2	0
KRTAP4-11	0	0	0	0	0	0	0	0	0	0	0	0	0	0	0	0	0	0	0	0	0	0	0	0	0	0	0	4	0	0	0	0	4	0	0	2	0	0	0	0	0	0	0	0	0	0	0	0	0
KRTAP4-9	0	0	0	0	0	0	4	0	2	0	0	0	0	0	0	0	0	0	0	1	0	0	0	0	0	0	0	0	0	0	0	0	0	8	0	0	0	0	0	0	0	0	0	0	0	0	0	0	0
KRTAP4-16	0	0	0	2	0	0	2	0	0	0	0	0	0	0	0	2	0	0	0	3	1	0	0	0	2	4	0	0	0	0	0	8	0	0	0	0	0	0	0	0	0	0	0	0	0	0	0	0	0
KRTAP4-8	0	0	0	0	0	0	0	0	0	0	4	0	0	0	0	0	0	0	0	0	0	0	6	0	0	4	0	0	0	0	0	0	1	0	0	0	0	0	0	0	0	0	0	0	0	0	0	0	0
LOC100996750	0	0	0	0	0	0	0	0	0	0	0	0	0	0	0	0	0	0	0	0	0	0	0	0	0	0	0	0	0	0	0	0	0	0	0	0	0	0	0	0	0	0	0	0	0	0	0	0	0
KRTAP2-5P	0	0	0	0	0	0	0	0	0	0	0	0	0	0	0	0	0	0	0	0	0	0	0	0	0	0	0	0	0	0	0	0	0	0	0	0	0	0	0	0	0	0	0	0	2	0	0	0	0
KRTAP2-4	0	0	0	0	0	0	0	0	0	0	0	0	0	0	0	0	0	0	0	0	0	0	0	0	0	0	0	0	0	0	0	0	0	0	0	0	0	0	0	0	0	0	0	0	0	0	0	0	0
KRTAP2-3	0	0	0	0	0	0	0	0	0	0	0	0	0	0	0	0	0	0	0	0	0	0	0	0	0	14	0	0	0	0	0	0	0	0	0	0	0	0	0	0	0	0	0	0	0	0	0	0	0
KRTAP2-2	0	0	0	0	0	0	0	0	0	0	0	0	0	0	0	0	0	0	0	0	0	0	0	0	0	0	0	0	0	0	0	0	0	0	0	0	0	0	0	0	0	0	0	0	0	0	0	0	0
KRTAP2-1	0	0	1	0	0	0	0	0	0	0	0	0	0	4	0	0	0	0	0	0	2	0	2	0	0	4	0	0	0	0	0	0	0	0	0	0	2	0	0	0	0	0	0	0	0	0	0	0	0
KRTAP1-1	0	0	0	2	0	0	0	0	0	0	0	0	0	0	0	0	0	0	0	0	0	4	0	0	0	0	0	0	0	0	0	0	0	0	0	0	4	0	0	0	0	0	0	0	0	0	1	0	0
KRTAP1-3	0	0	0	0	0	0	0	0	0	4	0	0	0	0	0	0	0	2	0	0	0	0	0	0	4	0	0	0	0	0	0	0	0	0	0	0	0	0	0	0	0	0	0	0	2	0	0	0	0
KRTAP1-4	0	0	0	0	0	0	0	0	0	0	2	0	0	0	0	0	0	2	0	0	0	0	0	0	0	0	0	0	0	0	0	0	0	0	0	0	0	0	0	0	0	0	0	0	0	0	0	2	0
KRTAP1-5	6	6	0	0	0	0	0	0	0	0	0	0	0	0	0	0	0	0	0	0	0	0	0	0	0	0	0	0	0	0	0	0	0	0	0	0	0	0	0	0	0	0	0	0	0	0	0	0	0
KRTAP3-1	0	0	0	0	0	0	0	0	0	0	0	0	0	0	0	0	0	0	0	0	0	0	0	0	0	0	0	0	0	0	0	0	0	0	0	0	0	0	0	0	0	0	0	0	0	0	0	0	0
KRTAP3-4P	0	0	0	0	0	0	0	0	0	0	0	0	0	0	0	0	0	0	0	0	0	0	0	0	0	0	0	0	8	0	0	0	0	0	0	0	0	0	0	0	0	0	0	0	0	0	0	0	0
KRTAP3-2	0	0	0	4	0	0	0	0	0	0	0	0	0	0	2	0	0	0	2	4	0	0	0	0	0	0	0	0	0	0	0	0	0	0	2	0	0	0	0	0	0	0	0	0	0	2	0	0	0
KRTAP3-3	0	0	0	0	0	0	0	4	0	0	0	0	0	0	0	0	0	0	0	0	0	0	0	0	0	0	0	0	0	0	0	0	0	0	0	0	0	0	0	0	0	0	0	0	0	0	0	0	2
KRT40	4	0	2	4	0	0	0	1	0	9	5	0	0	0	0	0	0	0	0	0	10	0	0	0	2	0	1	5	2	0	0	0	0	0	0	14	4	0	0	2	2	0	0	0	2	12	5	4	0
KRT39	0	0	0	0	0	0	0	2	2	0	0	0	0	1	13	0	0	0	2	0	6	0	0	0	6	2	0	0	0	3	0	0	0	2	4	0	0	0	0	0	0	0	0	0	0	0	0	2	0
LOC107985072	0	0	0	0	0	0	0	0	0	5	0	0	0	0	0	0	0	0	0	4	0	0	0	2	0	0	1	0	0	0	0	0	0	0	0	0	0	0	0	0	0	0	0	0	4	0	0	0	0
KRT23	0	10	0	7	0	6	2	0	2	20	0	0	8	0	0	4	10	6	4	4	0	0	10	14	0	0	8	1	0	4	2	0	4	2	16	6	13	0	4	2	0	0	14	0	0	14	2	22	0
KRT20	2327	1030	2397	976	287	15239	152	5376	14662	22426	3864	38	3361	2617	660	1536	97	12780	20	2151	267	848	1173	6395	744	66	51730	27249	3405	9073	387	858	1876	694	2562	12734	1283	2586	393	545	1059	936	419	533	575	9205	831	8280	486
KRT12	2	0	0	0	0	37	0	18	52	53	8	0	0	4	0	0	0	8	0	0	0	6	2	10	0	4	201	101	2	121	0	0	4	0	6	2	0	14	0	0	0	0	0	0	0	18	0	16	0
LOC105371777	0	0	0	0	0	0	4	4	4	4	2	0	0	2	1	0	2	0	1	0	4	8	0	0	2	0	7	0	3	7	0	0	4	0	6	0	0	0	0	1	0	2	0	0	0	0	0	0	0
C17orf98	2	0	0	0	0	0	0	4	0	0	4	0	1	0	0	0	0	2	0	8	0	2	0	0	0	0	0	0	0	1	0	0	0	0	0	0	0	0	0	0	0	0	0	0	0	0	0	0	0
MIR4727	0	0	0	0	0	0	0	0	0	1	0	0	0	0	0	0	0	0	0	0	0	0	0	0	0	0	2	0	0	0	0	0	0	0	0	0	0	0	0	0	0	0	0	0	0	1	0	0	0
CWC25	206	75	111	64	24	349	85	290	574	705	255	10	105	102	146	70	193	544	67	161	320	593	312	206	236	44	1764	901	125	962	55	172	196	148	520	85	170	392	25	52	62	66	15	122	154	512	91	283	16
PIP4K2B	417	296	471	249	161	241	259	529	580	1172	288	13	469	141	388	369	279	384	270	597	1518	2079	1341	511	767	143	947	1103	215	854	181	620	754	178	949	311	296	220	130	175	182	184	49	174	238	575	396	237	67
RNU6-866P	0	0	0	0	0	0	0	0	0	1	0	0	0	0	0	0	0	0	2	0	0	2	0	0	0	0	0	4	0	5	0	0	0	0	0	0	0	0	0	0	0	0	0	0	0	9	0	0	0
PSMB3	303	176	359	141	92	378	39	388	581	618	380	18	458	89	231	351	407	478	91	414	417	348	378	356	196	103	1257	1102	261	479	180	347	385	156	476	401	318	128	84	103	123	197	52	92	144	695	278	248	56
TRN-GTT2-5	0	0	0	0	0	0	0	0	0	0	0	0	0	0	0	0	0	0	0	0	0	0	0	0	0	0	0	0	0	0	0	0	0	0	0	0	2	0	0	0	0	0	0	0	0	0	0	0	0
LOC100287808	0	2	0	2	0	4	2	0	4	6	0	0	0	2	2	0	2	0	0	18	16	4	8	0	0	16	4	2	0	2	0	0	4	6	6	0	0	0	0	0	0	4	0	0	0	0	2	0	0
PCGF2	103	83	73	41	24	81	32	66	132	222	62	0	206	36	98	49	94	218	62	206	248	501	358	79	239	66	437	308	81	176	16	105	153	30	307	105	86	31	12	37	38	41	25	23	88	92	95	91	14
RNA5SP440	0	0	0	0	0	0	0	0	2	0	0	0	0	0	0	0	0	2	0	0	0	0	0	0	0	0	0	2	0	3	0	0	0	0	0	0	1	0	0	0	0	0	0	0	0	0	0	0	0
CISD3	98	102	168	61	34	265	34	115	234	317	213	13	186	42	166	115	172	323	45	175	119	145	186	196	131	88	555	404	123	167	93	110	130	38	247	154	129	113	40	33	47	108	51	34	60	452	118	117	33
MIR4726	0	0	0	0	0	0	0	0	0	0	0	0	0	0	0	0	0	0	0	0	2	0	0	0	0	0	0	0	0	0	0	0	0	0	0	0	0	0	0	0	0	0	0	0	0	1	0	0	0
LOC105371762	0	0	2	3	0	2	0	0	4	42	3	0	2	0	1	0	8	8	8	0	61	78	33	10	0	0	49	22	0	61	0	0	0	0	47	0	0	0	0	0	0	0	0	0	3	15	0	9	0
MLLT6	938	764	1104	627	365	1385	1029	1691	1988	3906	1364	78	1519	468	1060	583	1026	1719	811	1569	4217	7663	4536	1334	2729	1413	5894	3308	904	3218	433	1647	2463	505	4171	1151	950	694	318	430	426	548	130	508	1106	2401	1532	1215	149
MIR4734	0	0	0	0	0	0	0	0	0	0	2	0	0	0	0	0	0	0	0	0	2	2	0	0	0	0	2	0	0	1	0	0	0	0	0	0	0	0	0	0	0	0	0	0	0	0	0	0	0
LOC105371763	10	0	16	6	17	4	4	16	14	55	8	4	12	6	23	14	13	6	15	30	78	88	44	21	22	2	37	40	5	35	12	20	8	4	21	2	18	5	2	10	0	10	0	7	19	23	11	6	0
LOC105371764	0	0	8	3	0	4	4	10	2	6	0	2	4	0	6	0	1	1	0	0	10	8	6	2	8	4	2	0	8	4	0	10	7	14	2	6	10	1	0	0	0	1	0	0	8	0	10	0	0
EPOP	4	0	3	8	6	16	4	13	21	24	10	0	2	4	4	12	66	42	12	10	48	50	24	5	16	14	37	43	2	17	25	0	41	28	16	8	19	2	19	0	0	8	0	4	23	54	21	4	7
LOC105371761	4	0	0	0	0	0	2	1	1	0	0	0	4	0	0	0	0	2	4	0	2	17	1	0	0	15	0	0	2	2	0	0	0	0	6	4	0	0	0	0	0	0	0	0	0	1	0	0	0
SRCIN1	33	20	5	0	8	12	23	57	39	68	29	0	62	8	9	2	71	44	35	107	57	630	77	10	145	77	108	44	19	74	2	39	47	1	698	24	25	1	5	6	13	0	0	2	32	48	18	16	2
LOC101929494	4	0	0	0	0	0	0	4	4	3	0	0	0	0	5	0	6	4	2	10	22	29	24	2	2	2	3	4	20	9	0	0	8	4	7	0	0	0	0	0	0	2	0	2	1	0	6	0	0
ARHGAP23	309	86	137	56	60	69	162	156	334	627	69	6	237	70	119	101	246	269	205	232	1009	2185	1257	219	248	154	388	653	86	304	53	206	226	46	455	96	94	45	49	36	43	70	26	42	129	115	125	62	4
SOCS7	219	134	181	74	46	162	72	164	523	585	185	8	144	70	128	69	96	273	151	231	580	762	496	184	200	168	841	839	152	619	113	298	206	121	718	134	162	88	53	76	59	64	27	101	137	579	133	130	20
GPR179	0	0	2	6	0	7	2	4	20	14	14	0	0	4	0	6	0	7	0	6	26	29	20	2	6	44	19	16	2	9	0	0	2	4	20	6	0	0	2	0	0	0	0	0	10	12	13	0	0
MRPL45	153	109	155	89	42	173	59	128	203	228	195	14	164	42	220	120	188	192	49	333	181	172	309	169	162	30	314	420	177	210	67	202	238	76	248	118	134	65	34	35	43	67	28	106	115	317	152	191	24
LOC105371760	4	0	0	0	0	0	0	0	0	0	0	0	0	0	0	0	0	0	0	0	2	0	0	0	0	0	0	0	0	0	0	0	0	1	2	0	0	0	0	0	0	0	0	0	0	0	0	0	0
NPEPPSP1	65	41	13	22	14	205	24	196	411	430	116	0	101	48	31	17	57	226	27	103	191	305	115	49	48	46	814	557	92	673	21	55	80	26	198	64	72	68	2	9	1	38	4	17	57	212	28	84	8
TBC1D3	2	0	2	0	0	0	0	0	3	21	0	0	0	4	8	0	4	8	0	0	4	0	0	0	0	0	83	13	4	67	0	0	2	0	2	0	0	0	0	0	0	0	0	0	0	7	2	0	0
LOC102723933	0	0	0	0	0	0	0	0	0	0	0	0	0	0	0	0	0	0	0	0	0	0	0	0	0	0	0	0	0	0	0	0	0	0	0	0	0	0	0	0	0	0	0	0	0	0	0	0	0
RNA5SP526	0	0	0	0	0	0	0	0	0	0	0	0	0	0	0	0	0	0	0	0	1	0	0	0	0	0	0	0	0	0	0	0	0	0	0	0	0	0	0	0	0	0	0	0	0	0	0	0	0
LOC112268325	0	0	0	0	0	0	0	0	0	0	0	0	0	0	0	0	0	0	0	0	0	0	0	0	0	0	0	0	0	0	0	0	0	0	0	0	0	0	0	0	0	0	0	0	0	0	0	0	0
TBC1D3E	4	0	3	2	0	24	4	41	87	88	8	0	19	15	12	0	14	32	0	15	52	60	25	20	17	4	187	146	2	145	0	9	2	10	50	10	12	5	0	0	9	0	0	5	15	96	14	18	0
LOC102723851	0	0	0	0	0	0	0	0	0	0	0	0	0	0	0	0	0	0	0	0	0	0	0	0	0	0	0	0	0	0	0	0	0	0	0	0	0	0	0	0	0	0	0	0	0	0	0	0	0
RNU6-489P	0	0	0	0	0	0	0	0	0	0	0	0	0	0	0	0	0	0	0	0	0	0	0	0	0	0	0	0	0	0	0	0	0	0	0	0	0	0	0	0	0	0	0	0	0	0	0	0	0
YWHAEP7	0	2	0	0	0	0	0	2	2	6	0	0	0	0	2	0	0	0	1	0	34	19	4	5	0	0	3	2	0	10	2	0	0	0	0	0	2	6	0	0	0	0	0	0	8	0	2	0	0
LOC105371757	0	0	0	0	0	0	0	0	0	0	0	0	0	0	0	0	1	0	0	0	2	0	0	0	0	0	0	0	0	0	0	0	0	0	0	0	0	0	0	0	0	0	0	0	0	0	0	0	0
LOC105371754	2	0	0	2	0	16	3	14	20	94	4	0	0	8	0	0	10	24	0	10	2	8	0	29	0	8	127	33	0	136	0	6	0	2	169	0	0	12	0	0	0	0	0	0	4	154	6	14	2
LOC107985009	0	0	0	0	0	8	0	1	3	22	0	0	0	3	0	4	6	8	2	4	9	0	1	2	0	8	23	14	0	65	0	0	0	0	51	0	0	10	0	0	0	0	0	0	0	32	0	4	0
HNF1B	58	58	28	25	8	230	52	150	134	374	114	6	93	33	65	10	54	100	12	92	39	95	116	91	93	29	728	228	90	478	9	95	91	20	497	58	56	84	12	16	4	12	14	30	29	289	110	158	18
LOC105371756	0	0	0	2	0	8	0	1	5	10	0	0	0	0	0	0	0	0	0	0	14	2	8	0	4	0	12	6	6	15	0	0	0	3	49	0	0	0	0	0	0	0	0	0	0	14	0	0	0
LOC105371755	6	0	2	0	0	10	0	2	11	20	0	0	0	0	0	0	0	9	0	0	8	15	3	2	0	0	43	32	0	45	0	0	0	0	13	0	0	2	0	0	0	0	0	0	2	7	0	7	0
MIR378J	0	0	0	0	0	0	0	0	2	5	0	0	0	0	0	0	0	0	0	0	2	4	10	0	0	0	10	6	0	8	0	0	0	0	2	0	0	0	0	0	0	2	0	0	0	7	0	2	0
DDX52	222	103	149	90	34	208	35	177	505	759	156	3	176	40	76	111	187	397	30	185	374	395	250	158	106	26	1196	837	121	549	68	191	134	39	557	149	108	99	34	35	39	58	17	81	98	629	157	179	14
SYNRG	484	185	514	266	118	603	189	601	883	1741	332	16	540	204	266	354	251	889	186	567	1517	1611	847	490	298	116	2289	1549	377	2114	201	613	650	265	1095	529	303	216	165	83	149	213	62	212	475	969	327	373	89
DUSP14	26	6	34	4	8	8	16	28	39	88	28	0	36	7	9	6	34	23	13	52	122	170	81	28	19	18	35	76	34	49	10	30	36	7	40	43	79	15	2	6	12	12	10	4	26	59	14	8	0
LOC100419621	0	0	0	0	0	6	0	3	12	39	2	0	3	1	0	0	9	10	0	0	15	26	8	4	0	0	40	23	0	54	0	0	0	0	16	0	0	0	0	0	0	0	0	0	0	8	2	8	0
TADA2A	71	60	77	55	20	124	19	153	288	359	105	7	96	44	111	66	68	153	39	132	276	267	239	103	131	32	447	364	52	336	36	87	98	41	307	76	79	55	31	39	31	38	4	36	63	276	73	122	12
C17orf78	29	0	44	0	0	163	2	395	6	128	40	0	3	82	8	4	7	28	3	12	30	34	7	105	0	0	339	18	4	18	0	0	0	3	60	10	2	11	0	0	0	2	2	0	0	249	0	135	0
SNORA90	0	0	0	0	0	0	0	0	0	0	0	0	0	0	0	0	0	0	1	0	0	0	0	0	0	0	0	2	0	0	0	0	0	0	2	0	0	0	0	0	0	0	0	0	0	0	0	0	0
RPL18AP12	0	0	0	0	0	6	0	0	0	4	0	0	0	0	0	0	0	0	0	8	3	4	2	2	0	0	13	6	0	2	0	0	1	0	4	0	0	0	0	0	0	0	0	0	0	12	0	0	0
HMGB1P24	0	0	2	0	0	8	0	2	10	11	0	0	0	0	0	0	6	7	2	0	20	12	10	4	0	0	59	26	2	18	0	0	2	0	14	1	2	2	0	0	0	2	2	0	3	32	0	8	0
RPS2P49	0	0	0	4	0	6	0	4	2	7	0	0	0	0	0	5	3	12	0	0	3	12	2	6	0	0	34	17	4	17	0	0	0	0	17	0	0	0	0	0	0	2	0	0	2	26	0	2	0
ACACA	318	290	221	112	66	353	75	579	821	1831	426	4	487	57	233	149	375	830	98	304	921	1464	680	587	305	163	2823	1531	296	1373	108	434	352	103	1788	313	218	205	42	112	70	149	55	137	192	2618	225	458	43
LOC105371753	0	0	0	2	0	2	0	10	35	82	4	0	6	10	4	0	10	29	6	11	13	81	10	6	0	14	96	66	0	79	0	2	0	4	50	0	0	8	0	0	0	2	0	0	6	82	0	13	0
MIR2909	4	0	0	2	0	0	0	0	4	0	0	0	0	0	0	0	2	0	0	0	3	0	8	2	0	0	0	7	0	9	0	0	0	0	6	0	0	2	0	0	0	0	0	0	0	20	0	0	0
AATF	311	190	315	167	62	483	146	316	798	959	362	10	380	99	242	181	407	539	153	680	474	539	493	297	275	75	1522	1261	225	679	150	354	455	170	571	379	293	216	89	105	86	183	40	152	280	959	275	404	42
LHX1	2	0	0	0	0	2	0	0	0	2	0	0	0	0	0	0	4	0	0	0	8	2	0	2	0	0	0	0	0	0	0	4	0	2	0	0	1	0	0	0	0	0	0	0	0	0	0	0	2
LHX1-DT	0	0	0	0	0	0	0	0	0	0	4	0	0	0	8	12	0	5	0	4	2	5	3	0	4	22	4	0	0	0	0	0	0	0	0	5	1	0	0	0	0	0	0	0	0	0	4	0	0
LOC105371750	0	0	6	8	0	0	4	0	2	2	6	0	1	0	8	0	5	0	0	3	35	14	10	2	0	34	18	2	9	8	0	6	3	0	2	14	2	0	0	0	0	0	0	0	5	7	8	0	0
LOC105379600	0	0	0	0	0	0	0	0	0	0	0	0	0	0	0	0	0	0	0	0	0	0	0	0	0	0	0	0	0	0	0	0	0	0	0	0	0	0	0	0	0	0	0	0	0	0	0	0	0
LOC105371751	2	0	0	0	0	0	0	2	0	10	0	0	0	0	0	4	0	0	2	7	12	8	2	0	2	0	6	4	8	4	0	0	2	0	2	2	0	0	0	0	0	0	0	0	0	8	0	0	0
LOC105376836	0	0	0	0	0	0	0	0	0	0	0	0	0	0	0	0	0	0	0	0	0	0	0	0	0	0	0	0	0	0	0	0	0	0	0	0	0	0	0	0	0	0	0	0	0	0	0	0	0
MRM1	4	0	24	9	2	73	10	93	120	354	24	0	28	27	32	35	52	102	17	34	120	54	52	117	28	32	725	220	10	76	11	46	36	10	192	22	28	43	6	2	9	0	2	8	18	201	10	67	6
LOC107985031	2	13	2	0	0	166	0	76	303	306	10	0	3	42	0	10	13	156	0	0	11	19	7	85	0	7	875	478	3	325	0	0	0	2	188	0	0	15	4	0	0	2	0	0	6	134	0	77	0
DHRS11	114	46	354	18	26	1653	20	706	1692	2045	786	2	87	438	33	91	146	1576	18	123	72	75	104	848	76	40	6044	2752	152	1862	39	62	102	28	938	554	198	299	12	65	107	38	30	36	33	856	50	959	9
RPS2P50	0	1	4	2	0	6	4	6	65	91	1	0	0	18	2	0	9	37	0	1	24	66	62	8	6	1	147	93	1	102	0	0	0	3	67	0	2	8	0	0	0	4	0	0	9	47	0	10	0
GGNBP2	342	196	349	137	76	420	107	455	749	1046	323	18	322	118	225	185	266	620	175	421	651	717	548	452	228	84	2084	1569	315	1250	122	345	272	118	828	317	177	264	82	132	139	169	47	162	201	1088	231	340	28
PIGW	63	27	33	26	6	20	8	34	80	60	16	6	28	8	45	30	40	32	15	22	76	63	36	46	16	0	82	169	2	61	11	45	33	14	126	28	13	15	8	4	15	18	3	12	6	185	26	10	10
MYO19	187	57	70	69	73	230	50	213	556	762	188	3	131	55	111	85	211	299	79	164	443	744	451	153	124	97	1583	1071	105	680	33	150	118	121	982	146	85	90	29	39	26	77	22	32	97	1051	126	242	14
RNA5SP439	0	0	0	0	0	0	0	0	3	6	0	0	0	0	0	0	0	0	0	0	4	6	4	0	0	0	4	3	0	4	0	0	0	0	2	0	0	2	0	0	0	0	0	0	0	1	0	0	0
ZNHIT3	72	24	60	40	7	47	11	55	78	117	46	4	47	9	76	42	54	52	52	33	164	98	101	66	27	25	142	121	50	114	27	75	63	38	109	26	29	31	22	24	26	29	8	20	38	157	46	68	12
LOC105371749	0	0	0	0	0	0	0	0	2	0	0	0	0	0	0	0	0	0	0	2	0	0	0	0	10	4	0	1	0	0	0	0	0	2	0	0	0	0	0	0	0	0	0	0	0	0	0	0	0
TBC1D3JP	0	0	0	2	2	0	4	14	6	10	1	0	0	0	0	0	0	6	2	2	2	0	4	2	2	0	18	16	0	9	0	0	0	0	6	4	0	2	0	0	0	0	0	0	2	2	0	0	0
TBC1D3F	1	0	0	1	0	0	0	0	23	10	4	0	0	2	0	0	0	4	2	0	1	6	2	0	4	1	25	4	0	11	0	0	0	0	9	2	1	0	0	0	0	0	0	0	1	5	0	0	0
RNU6-1192P	0	0	0	0	0	0	0	0	0	0	0	0	0	0	0	0	0	0	0	0	0	0	0	0	0	0	0	0	0	0	0	0	0	0	0	0	0	0	0	0	0	0	0	0	0	0	0	0	0
TBC1D3H	0	0	0	0	0	0	0	0	0	0	0	0	0	0	0	0	0	0	0	0	0	0	0	0	0	0	0	0	0	0	0	0	0	0	0	0	0	0	0	0	0	0	0	0	0	0	0	0	0
LOC100420852	2	4	0	2	0	0	2	0	16	2	4	0	2	0	4	4	8	0	0	19	32	6	0	2	0	20	53	29	9	0	0	2	6	6	17	3	4	0	0	0	0	0	0	0	2	5	10	0	0
LOC102723414	0	0	0	0	0	0	0	0	0	0	0	0	0	0	0	0	0	0	0	0	0	0	0	0	0	0	2	0	0	0	0	0	0	0	0	0	0	0	0	0	0	0	0	0	0	0	0	0	0
LOC101060212	20	9	6	0	0	9	2	31	40	100	9	0	2	5	6	0	4	16	2	13	39	16	48	14	17	1	168	112	2	224	2	2	7	3	53	1	6	39	0	2	3	0	0	9	2	88	8	7	0
CCL23	0	0	2	0	0	0	2	2	0	2	0	0	1	0	0	0	2	2	0	2	2	6	0	0	0	0	4	9	0	1	0	0	2	0	2	0	4	0	2	0	0	0	0	0	0	0	0	0	0
CCL15	0	0	0	0	0	0	0	0	0	1	0	0	0	0	0	0	0	0	0	0	0	0	0	0	0	0	3	0	2	3	0	0	0	0	0	0	2	0	0	0	0	0	0	0	0	0	0	0	0
CCL15-CCL14	2	1	2	2	0	0	0	4	31	30	8	0	10	0	2	0	0	9	0	0	0	2	2	4	0	14	22	41	0	22	0	2	5	0	12	0	8	2	0	0	2	0	2	0	0	20	0	8	0
CCL14	0	0	0	0	0	2	0	0	0	4	2	0	0	0	0	0	0	0	0	0	7	0	2	0	0	0	0	2	0	0	0	0	0	0	0	0	0	0	0	0	0	0	2	0	0	0	0	0	0
CCL16	0	0	0	0	0	0	0	0	6	22	0	0	0	0	0	0	0	6	2	2	36	6	8	4	2	0	19	2	0	5	2	0	2	0	2	2	4	0	0	0	0	0	0	0	0	0	14	2	0
LYZL6	0	0	0	0	0	0	0	0	2	4	0	0	0	0	0	0	0	0	0	0	2	0	0	0	0	4	0	0	0	2	0	0	2	2	0	0	0	0	0	0	0	0	0	0	0	0	0	0	0
RDM1	0	0	0	2	1	0	2	8	1	14	0	0	0	0	0	1	0	0	0	0	9	6	2	0	12	0	25	6	6	12	2	0	2	2	9	14	2	0	0	0	0	1	2	0	8	4	0	0	0
LOC100133244	0	0	0	0	0	0	6	0	2	2	0	0	0	0	0	0	0	0	0	0	6	2	0	0	0	0	6	0	0	2	0	0	0	0	6	8	0	2	0	0	0	0	0	0	0	6	0	0	0
LRRC37A9P	0	0	0	6	0	0	0	9	0	2	0	0	0	0	0	0	0	2	0	0	0	0	0	0	0	0	4	0	0	0	0	0	0	0	2	0	0	0	0	0	0	0	0	0	0	0	0	0	0
LRRC37A8P	0	0	0	2	4	0	0	8	0	6	0	0	0	0	0	2	3	2	0	2	10	14	6	8	6	16	5	8	0	24	0	14	2	2	8	10	2	0	0	0	0	0	0	2	0	11	2	2	0
LOC105371745	0	0	0	0	0	0	0	0	0	0	0	0	0	0	0	0	0	0	0	0	2	0	0	0	0	6	0	0	0	0	0	0	0	0	2	0	0	0	0	0	0	0	0	0	0	0	0	0	0
CCL5	72	42	228	165	20	18	40	89	38	286	59	1	150	34	180	117	109	145	48	361	319	378	247	99	112	64	188	40	92	191	158	475	241	96	76	185	49	26	50	46	43	104	18	92	421	13	151	28	30
LOC105371744	0	0	0	0	0	0	0	0	8	5	0	0	0	0	0	0	0	0	0	0	2	9	0	2	2	4	2	0	6	22	4	0	0	0	3	0	0	0	0	0	0	0	0	0	4	0	0	0	0
LOC107985049	5	2	9	2	0	2	0	0	0	6	1	2	2	0	0	4	1	2	1	3	4	4	6	4	0	0	3	2	0	3	0	1	1	2	3	2	2	1	1	5	1	3	0	8	2	6	2	2	0
HEATR9	6	12	0	0	0	0	0	5	13	10	2	0	0	0	2	0	0	6	6	0	11	24	10	7	0	8	11	7	12	22	0	0	1	2	12	0	0	0	2	0	0	0	0	0	2	12	0	2	0
TAF15	743	581	871	391	166	1091	286	847	1564	2203	1210	41	1332	186	932	541	1470	835	256	1386	1185	1279	1402	668	869	222	2670	2225	757	1274	290	570	952	241	1554	864	766	304	140	247	257	315	139	462	713	1567	621	969	78
MMP28	52	41	43	24	8	298	21	230	844	936	121	8	190	101	50	45	246	651	29	123	178	130	68	104	122	79	3240	1656	236	1515	18	122	94	2	223	88	44	113	26	40	46	73	22	27	30	1763	66	196	19
SERPINF1	282	124	370	215	68	164	163	265	196	710	236	3	320	84	243	237	139	207	80	785	755	1899	916	232	348	215	440	396	405	326	188	433	373	206	346	369	181	131	138	39	38	97	54	120	136	61	134	100	47
SERPINF2	3	0	10	16	2	4	2	9	9	15	2	2	26	4	12	0	15	26	2	11	30	39	47	19	7	0	24	48	18	8	6	26	2	10	12	18	6	4	4	0	0	2	0	3	18	4	10	8	0
WDR81	194	76	204	125	69	278	80	198	544	1108	225	6	319	96	150	197	203	577	121	302	808	1522	768	249	390	355	1468	898	92	765	152	187	340	126	527	186	204	108	100	58	80	73	28	31	160	618	132	269	21
MIR22	0	0	0	0	0	0	0	0	0	0	0	0	0	0	0	0	0	0	0	0	0	0	0	0	0	0	0	0	0	0	0	0	0	0	0	0	0	0	0	0	0	0	0	0	0	0	0	0	0
MIR22HG	195	17	126	43	16	729	72	566	1680	2238	114	7	110	129	92	37	95	1146	14	182	182	1387	233	235	74	41	4900	2995	88	1897	27	140	92	43	387	223	45	134	20	37	29	92	8	58	73	892	95	303	19
TLCD2	232	208	150	67	52	721	82	819	1377	1614	503	25	321	153	263	107	199	1068	42	469	147	371	293	374	227	55	3636	1807	391	1702	57	182	315	71	577	506	145	293	56	141	68	192	118	107	161	906	97	421	33
PRPF8	1452	930	1274	728	400	1609	596	1842	3383	5332	1561	48	1748	560	1101	742	1600	2770	711	1704	4724	6807	3053	1373	1345	543	7376	5870	1057	3550	655	1831	1809	861	3766	1617	1100	573	389	373	339	380	219	472	1205	4925	1117	1307	217
RILP	122	109	100	58	16	313	82	229	324	613	241	5	176	110	146	38	113	419	29	242	90	191	174	147	149	74	1521	576	137	665	64	123	101	46	313	160	99	131	28	34	39	73	8	40	79	361	140	199	41
SCARF1	108	16	43	34	4	134	53	87	169	400	30	4	66	42	35	25	45	172	47	21	416	443	312	67	181	62	798	283	22	435	30	18	49	29	328	24	22	85	14	6	28	64	12	18	26	119	18	70	12
RN7SL105P	0	0	0	0	0	2	0	0	0	8	0	0	0	0	0	6	0	0	0	0	4	0	0	2	1	0	0	0	0	0	0	0	0	0	2	0	2	0	0	0	0	0	0	0	0	0	0	4	0
SLC43A2	77	26	181	58	32	722	39	115	139	1473	94	8	135	64	128	175	70	286	31	156	386	529	212	204	83	63	511	161	46	268	122	101	193	82	255	115	122	69	52	30	38	42	71	37	89	390	64	363	53
CRK	500	393	531	277	125	747	228	817	1536	1716	615	33	705	209	548	450	388	1151	155	789	930	940	932	578	524	111	2572	2683	674	1860	224	785	619	182	827	790	447	250	135	151	210	342	114	270	333	1546	358	537	89
YWHAE	1799	1534	2103	1311	481	1996	702	2420	3117	3243	1981	148	2512	522	2221	1538	2249	2965	621	3272	2933	2096	2766	2219	1516	377	4975	5314	2133	2156	1044	2910	1882	1145	1956	2863	1733	994	533	771	657	1109	391	1174	1286	4342	1821	1823	508
ABR-AS1	0	0	8	0	2	10	1	4	111	158	2	0	9	10	0	0	10	8	6	10	50	52	18	14	2	8	71	264	2	14	0	8	14	2	101	0	12	6	0	0	0	6	0	0	2	178	4	11	2
MRPL14P1	0	12	0	0	0	0	0	4	16	15	0	0	2	3	0	1	4	6	2	0	9	9	19	3	0	10	7	27	2	2	0	0	0	0	19	0	4	0	0	0	0	0	0	0	2	12	0	6	0
LOC105371480	27	10	20	4	4	52	12	5	178	274	15	0	12	21	12	10	21	35	18	10	165	165	98	53	28	24	180	296	0	61	2	0	21	4	157	8	7	6	3	2	0	12	2	0	9	136	4	12	6
LOC105371425	2	0	2	1	0	4	0	5	53	60	0	0	0	0	0	0	1	27	0	0	14	27	12	5	2	0	70	78	0	51	0	0	2	0	11	0	0	0	0	4	0	2	0	0	4	42	0	4	0
LOC101929045	0	0	0	0	0	0	0	0	0	0	0	0	0	0	0	0	0	0	0	0	0	0	0	0	0	0	0	0	0	0	0	0	0	0	0	0	0	0	0	0	0	0	0	0	0	0	0	0	0
LINC02091	0	0	0	0	0	0	0	2	0	7	6	0	2	0	0	0	8	2	0	0	6	17	10	0	0	0	6	0	10	0	0	3	0	2	4	0	3	0	0	0	0	0	0	0	2	0	0	0	0
DOC2B	73	42	53	22	13	20	67	59	123	272	34	4	80	16	46	87	206	156	29	50	516	836	492	29	63	25	128	204	45	50	27	131	142	43	441	116	153	17	18	24	19	80	12	16	78	10	46	10	12
SCGB1C2	6	0	0	0	0	0	0	0	0	1	6	0	0	0	0	0	0	0	0	0	0	0	0	0	0	0	0	0	0	0	0	0	0	0	0	0	0	0	0	0	0	0	0	0	0	0	0	0	0
LOC101929828	0	0	0	0	0	0	0	0	0	2	0	0	0	0	0	0	0	0	0	0	2	0	0	0	0	0	0	0	0	4	0	0	0	0	0	0	0	0	0	0	0	0	0	0	0	0	0	0	0
GTF2IP17	0	0	0	0	0	0	0	0	0	0	0	0	0	0	0	0	0	0	0	0	0	0	0	0	0	0	0	0	0	0	0	0	0	0	0	0	0	0	0	0	0	0	0	0	0	0	0	0	0
LOC101929823	0	0	4	0	0	0	0	0	13	39	0	0	2	2	0	1	2	2	2	1	10	38	12	0	6	0	57	34	0	44	0	0	1	0	22	0	3	2	0	0	0	0	0	0	0	18	4	6	0
LINC02887	6	4	2	0	0	0	0	0	12	10	2	0	8	2	0	0	0	4	4	0	4	15	5	0	0	0	28	18	4	18	0	0	14	0	7	0	0	1	0	0	0	0	0	2	4	11	0	2	0
LOC102723777	0	0	0	0	0	0	0	0	1	4	0	0	0	0	0	0	4	7	0	0	0	10	6	0	0	0	19	7	0	10	0	0	0	0	4	0	0	0	0	0	0	0	0	0	0	4	0	0	0
LOC101929817	0	6	24	2	2	10	0	93	4	9	12	0	47	2	5	6	8	2	6	70	159	20	5	9	9	17	20	11	18	86	6	15	9	10	8	2	6	10	3	16	0	0	0	6	3	3	4	2	2
UTP4	231	108	142	110	40	128	66	129	321	400	214	6	204	20	134	105	280	175	64	221	292	276	340	81	126	60	361	560	100	132	55	221	165	105	512	162	137	58	32	34	44	40	6	42	80	491	189	131	11
RNU6-22P	0	0	0	0	0	0	0	0	0	0	0	0	0	0	0	0	0	0	0	0	2	0	0	0	0	0	0	0	0	0	0	0	0	0	0	0	0	0	0	0	0	0	0	0	0	0	0	0	0
SNTB2	685	392	619	261	130	290	243	683	851	1382	319	40	687	134	496	298	308	685	275	934	1613	1804	1265	519	663	116	1526	1533	605	1289	157	927	602	197	1346	451	327	228	71	199	228	314	82	402	263	857	502	376	57
CES5A	0	0	0	0	0	11	2	2	4	0	4	0	0	0	0	0	0	0	0	0	6	2	0	0	0	8	6	0	0	0	0	4	2	0	4	0	0	0	0	0	0	0	0	0	0	0	0	0	0
CES1	59	8	22	9	0	22	14	34	62	432	3	0	21	38	32	29	6	9	12	32	240	534	216	73	19	6	53	74	167	77	4	20	84	0	20	14	15	4	6	12	4	12	0	24	10	14	2	2	0
LOC107987423	0	0	0	0	0	0	0	0	0	0	0	0	0	0	0	0	0	0	0	0	0	0	0	0	0	0	0	0	0	0	0	0	0	0	0	0	0	0	0	0	0	0	0	0	0	0	0	0	0
LOC441750	0	0	0	0	0	0	2	0	0	0	0	0	0	0	0	0	0	0	0	0	0	0	0	0	0	0	0	4	4	0	0	0	0	0	0	0	0	0	0	0	0	0	0	0	4	0	0	0	0
LOC100133127	0	0	0	0	0	0	0	0	0	0	0	0	0	0	0	0	0	0	0	0	0	0	0	0	0	0	0	0	0	0	0	0	0	0	0	0	0	0	0	0	0	0	0	0	0	0	0	0	0
LOC105371105	0	0	0	0	0	0	0	0	0	0	0	0	0	0	2	0	0	0	0	0	0	0	0	0	0	0	0	0	0	0	0	0	0	0	0	0	0	0	0	0	0	0	0	0	0	0	0	0	0
LOC105371098	2	3	0	0	0	0	0	1	6	17	5	0	2	0	0	2	0	9	0	9	1	0	6	0	0	0	20	1	11	29	0	0	0	0	5	0	0	0	2	0	0	0	0	0	0	2	2	0	0
NPIPA7	4	4	2	0	0	0	8	11	40	17	6	0	8	4	15	2	1	4	1	5	30	35	24	11	6	6	28	59	14	44	0	7	2	12	30	1	0	3	1	2	0	8	0	1	1	13	6	2	0
MIR6511A3	0	0	0	0	0	0	0	0	0	0	0	0	0	0	0	0	0	0	0	0	0	0	0	0	0	0	0	0	0	0	0	0	0	0	0	0	0	0	0	0	0	0	0	0	0	0	0	0	0
PKD1P2	56	8	15	0	4	28	13	137	281	96	18	0	11	9	26	6	27	64	15	23	152	664	126	23	38	59	198	709	17	106	7	14	56	9	314	57	9	32	2	3	5	2	1	7	16	74	18	45	0
MIR6770-2	0	0	0	0	0	0	0	0	0	0	0	0	0	0	0	0	0	0	0	0	0	0	0	0	0	0	0	0	0	0	0	0	0	0	0	0	0	0	0	0	0	0	0	0	0	0	0	0	0
MIR6511A2	0	0	0	0	0	0	0	0	0	0	0	0	0	0	0	0	0	0	0	0	0	0	0	0	0	0	0	0	0	0	0	0	0	0	0	0	0	0	0	0	0	0	0	0	0	0	0	0	0
PKD1P1	117	19	75	37	31	142	75	184	313	680	105	6	75	45	30	60	109	269	104	92	598	903	528	151	274	176	1003	640	17	599	42	67	165	28	917	35	92	96	12	26	27	50	12	30	63	412	97	94	2
MIR3180-2	0	0	0	0	0	0	0	0	0	0	0	0	0	0	0	0	0	0	0	0	0	0	0	0	0	0	0	0	0	0	0	0	0	0	0	0	0	0	0	0	0	0	0	0	0	0	0	0	0
MIR3670-2	0	0	0	0	0	0	0	0	0	0	0	0	0	0	0	0	0	0	0	0	0	0	0	0	0	0	0	0	0	0	0	0	0	0	0	0	0	0	0	0	0	0	0	0	0	0	0	0	0
MIR3179-2	0	0	0	0	0	0	0	0	0	0	0	0	0	0	0	0	0	0	0	0	0	0	0	0	0	0	0	1	0	0	0	0	0	0	0	0	0	0	0	0	0	0	0	0	0	0	0	0	0
LOC105371099	0	0	0	0	0	0	0	0	0	2	0	0	0	0	0	0	2	0	0	0	0	0	0	4	0	0	5	2	0	0	0	0	0	0	6	0	0	0	0	0	0	0	0	0	0	1	0	0	0
NOMO3	106	36	153	108	31	182	34	198	366	422	53	4	49	49	108	93	85	322	39	117	364	224	169	111	110	18	447	550	198	463	188	154	131	89	555	77	78	72	57	27	32	51	40	71	156	378	60	122	39
LOC105371100	2	0	0	0	0	7	2	3	2	22	0	0	0	10	0	0	0	7	0	3	0	0	2	4	2	0	28	2	0	27	0	0	0	0	20	0	0	1	2	0	0	0	0	0	1	6	0	0	0
ABCC6	38	22	46	14	4	455	7	409	253	1420	59	0	33	158	8	19	34	362	6	32	61	86	97	187	70	63	1610	349	36	1421	4	41	30	12	793	16	28	147	10	4	0	25	4	6	27	211	38	374	4
RPL17P40	0	0	0	0	2	0	0	0	10	26	0	0	0	0	0	0	0	13	0	0	27	6	4	0	1	0	4	10	0	8	0	0	0	0	14	0	4	0	0	0	0	0	0	0	2	15	0	4	0
ABCC1	428	77	300	150	107	246	138	433	2411	2646	278	8	283	140	177	273	476	1297	215	373	1703	2602	1234	399	443	224	3036	4468	313	2437	245	292	471	141	2126	251	282	303	112	114	93	136	24	94	264	2671	211	371	42
RPL15P20	0	0	0	0	0	0	0	0	2	0	0	0	0	0	0	0	0	0	0	0	2	0	0	0	1	0	1	1	0	0	0	1	0	0	0	0	2	0	0	0	0	0	0	0	0	0	0	0	0
LOC107984869	0	0	0	0	0	0	0	0	0	4	2	0	0	0	0	0	0	0	0	0	6	0	0	0	0	0	0	0	0	2	0	0	0	0	1	0	2	0	0	0	0	0	0	0	0	2	0	0	0
RNU6-213P	0	0	0	0	0	0	0	0	8	1	0	0	0	0	0	0	0	1	2	0	0	6	0	0	0	0	8	2	0	1	0	0	0	0	3	0	0	0	0	0	0	0	0	0	0	6	0	1	0
CEP20	231	196	219	87	63	102	85	216	270	219	224	12	206	49	175	132	199	180	52	310	340	220	296	157	183	6	338	546	184	207	62	267	260	78	427	122	121	85	51	69	92	80	37	119	102	326	200	146	21
MYH11	4642	2540	3943	1160	686	2377	1688	3187	5478	15505	1738	171	5077	1329	2631	1389	5887	1630	10324	2055	28625	58049	9844	27449	6397	1739	5620	9217	2801	6930	447	3068	3278	760	4761	2647	1069	988	608	1911	1212	1292	428	1584	2163	716	1883	1575	98
NDE1	256	130	148	90	39	187	76	232	515	774	165	10	186	46	142	110	254	444	96	160	585	861	490	275	320	115	973	925	144	703	121	178	246	43	763	166	231	120	54	56	50	87	25	90	174	890	129	250	38
MIR484	0	0	0	0	0	0	0	0	0	0	0	0	0	0	0	0	0	0	0	0	0	0	0	0	0	0	0	0	0	0	0	0	0	0	0	0	0	0	0	0	0	0	0	0	0	0	0	0	0
MIR6506	0	0	0	0	0	0	0	0	0	0	0	0	0	0	0	0	0	0	0	0	0	0	0	0	0	0	0	0	0	0	0	0	0	0	0	0	0	0	0	0	0	0	0	0	0	0	0	0	0
MARF1	1296	1101	1169	757	317	1327	748	1646	2078	3664	1293	50	1950	489	1023	675	612	1378	543	2437	2840	3882	2967	995	1717	357	3872	3494	1677	4572	369	1977	1529	602	2287	1248	728	512	338	373	451	511	186	717	919	1567	1396	1051	224
LOC105371102	0	0	0	1	0	0	1	0	14	13	0	0	6	0	4	2	0	2	3	0	14	21	3	8	1	2	10	12	0	9	0	0	0	0	1	0	2	0	0	0	0	0	0	0	0	7	0	0	0
BMERB1	151	124	146	69	41	137	105	190	265	395	109	0	217	42	145	109	163	152	78	227	452	921	478	142	286	113	250	544	254	145	18	194	189	56	182	147	186	44	24	56	93	51	12	69	94	101	159	108	6
MPV17L	10	59	87	23	15	50	18	117	102	96	105	8	33	0	44	30	78	147	16	47	43	72	90	73	48	6	133	161	95	74	4	31	55	9	36	67	70	34	21	21	16	76	6	21	26	172	67	77	4
NPIPA5	44	16	3	17	9	25	10	24	70	96	19	0	62	10	22	3	9	54	2	38	69	136	140	0	32	2	99	94	52	46	2	6	26	0	129	44	9	13	1	4	1	0	0	2	12	22	14	45	0
LOC105371103	0	0	2	0	0	1	0	4	6	5	0	0	0	0	0	0	0	3	1	0	2	1	4	1	0	0	16	0	0	28	0	6	0	0	7	0	0	0	0	0	0	0	0	0	0	4	4	0	0
ABCC6P1	12	4	18	7	0	118	16	142	123	273	21	0	2	33	8	0	8	58	0	28	4	30	39	36	30	0	365	202	8	297	2	13	7	3	169	44	9	53	6	6	0	24	4	0	8	12	9	127	0
ABCC6P2	6	2	2	0	0	31	0	44	15	30	21	0	4	14	8	2	2	41	0	27	0	10	24	2	4	12	72	30	30	69	0	2	18	0	93	0	2	6	0	0	2	2	6	2	2	0	12	23	2
NOMO1	244	113	194	187	53	295	61	329	659	843	99	10	171	122	238	201	185	828	83	277	702	729	414	211	81	50	1555	1283	409	965	206	437	379	347	1199	194	193	152	98	118	49	101	121	110	244	666	249	223	57
MIR3179-1	0	0	0	0	0	0	0	0	0	0	0	0	0	0	0	0	0	0	0	0	0	0	0	0	0	0	0	0	0	0	0	0	0	0	0	0	0	0	0	0	0	0	0	0	0	0	0	0	0
MIR3670-1	0	0	0	0	0	0	0	0	0	0	0	0	0	0	0	0	0	0	0	0	0	0	0	0	0	0	0	0	0	0	0	0	0	0	0	0	0	0	0	0	0	0	0	0	0	0	0	0	0
MIR3180-1	0	0	0	0	0	0	0	0	0	0	0	0	0	0	0	0	0	0	0	0	0	0	0	0	0	0	0	0	0	0	0	0	0	0	0	0	0	0	0	0	0	0	0	0	0	0	0	0	0
MIR1972-1	0	0	0	0	0	4	0	1	0	19	0	0	0	0	2	0	0	1	0	0	11	10	2	2	0	0	21	8	0	9	0	0	0	0	8	0	0	0	0	0	0	0	0	0	2	20	0	0	0
LOC728138	7	11	10	0	1	52	5	27	110	278	22	0	5	14	6	8	17	71	22	13	86	153	38	47	2	17	383	205	21	219	7	2	8	17	176	18	11	33	5	6	6	5	0	0	4	193	7	26	6
NPIPA1	0	0	0	0	0	0	0	0	0	0	0	0	0	0	0	0	0	0	0	0	0	0	0	0	0	0	0	0	0	0	0	0	0	0	1	0	0	0	0	0	0	0	0	0	0	0	0	0	0
MIR3179-3	0	0	0	0	0	0	0	0	0	0	0	0	0	0	0	0	0	1	0	0	0	0	0	0	0	0	0	0	0	0	0	0	0	0	0	0	0	0	0	0	0	0	0	0	0	0	0	0	0
MIR3670-3	0	0	0	0	0	0	0	0	0	0	0	0	0	0	0	0	0	0	0	0	0	0	0	0	0	0	0	0	0	0	0	0	0	0	0	0	0	0	0	0	0	0	0	0	0	0	0	0	0
MIR3180-3	0	0	0	0	0	0	0	0	0	0	0	0	0	0	0	0	0	0	0	0	0	0	0	0	0	0	0	0	0	0	0	0	0	0	0	0	0	0	0	0	0	0	0	0	0	0	0	0	0
LOC102724992	0	0	0	0	0	0	0	0	0	0	0	0	0	0	0	0	0	0	0	0	0	0	0	0	0	0	0	0	0	0	0	0	0	0	0	0	0	0	0	0	0	0	0	0	0	0	0	0	0
MIR6511A1	0	0	0	0	0	0	0	0	0	0	0	0	0	0	0	0	0	0	0	0	0	0	0	0	0	0	0	0	0	0	0	0	0	0	0	0	0	0	0	0	0	0	0	0	0	0	0	0	0
LOC100288162	0	0	0	0	0	0	0	0	0	0	0	0	0	0	0	0	0	0	0	0	0	1	1	0	0	0	0	0	0	0	0	0	0	0	0	0	0	0	0	0	0	0	0	0	0	0	0	0	0
MIR6770-1	0	0	0	0	0	0	0	0	0	0	0	0	0	0	0	0	0	0	0	0	0	0	0	0	0	0	0	0	0	0	0	0	0	0	0	0	0	0	0	0	0	0	0	0	0	0	0	0	0
NPIPA2	0	0	5	0	2	5	0	0	15	20	1	0	0	0	0	0	3	12	2	1	22	50	22	2	6	0	22	31	0	31	1	0	1	0	40	1	3	5	1	0	2	0	0	0	4	23	0	0	0
PKD1	532	89	173	44	142	305	249	379	1556	2868	193	6	382	206	164	134	402	808	819	230	2889	10970	2965	924	1442	1026	3922	2750	96	2131	97	302	350	57	3386	140	139	238	43	95	67	121	28	40	266	1110	189	260	17
LOC102724984	0	0	0	0	0	0	0	0	0	0	0	0	0	0	0	0	0	0	0	0	0	0	0	0	0	0	0	0	0	0	0	0	0	0	0	0	0	0	0	0	0	0	0	0	0	0	0	0	0
MIR1972-2	0	0	0	0	0	0	0	0	0	0	0	0	0	0	0	0	0	0	0	0	0	0	0	0	0	0	0	0	0	0	0	0	0	0	0	0	0	0	0	0	0	0	0	0	0	0	0	0	0
NTAN1	110	95	140	59	30	81	61	157	145	139	91	4	154	32	170	93	73	119	34	235	200	276	263	144	234	25	189	258	154	346	67	248	172	87	157	131	69	39	35	48	50	67	18	68	92	144	145	105	19
RRN3	147	116	202	70	40	169	102	207	283	570	211	4	205	43	112	154	134	245	60	171	493	385	276	162	153	36	560	586	122	354	59	214	188	52	669	165	109	73	57	56	90	97	8	85	75	635	104	115	21
LOC100505915	13	0	0	0	0	0	2	4	10	16	0	0	1	0	0	0	6	0	5	0	16	32	27	4	0	4	10	2	0	27	2	0	2	2	25	3	0	1	0	0	0	0	0	0	0	5	0	3	0
NPIPP1	12	6	8	0	2	7	0	11	28	38	4	0	0	2	2	2	13	2	7	40	33	76	14	2	6	0	30	41	6	26	2	0	28	0	45	2	0	4	0	3	0	4	0	2	2	22	20	8	0
NPIPA8	0	0	0	0	0	0	0	0	2	0	0	0	0	0	0	0	0	0	0	0	2	0	0	0	0	0	3	2	0	6	0	0	0	0	0	0	0	0	0	0	0	2	0	2	0	0	4	0	0
MIR6511B2	0	0	0	0	0	0	0	0	0	0	0	0	0	0	0	0	0	0	0	0	0	0	0	0	0	0	0	0	0	0	0	0	0	0	0	0	0	0	0	0	0	0	0	0	0	0	0	0	0
PKD1P6-NPIPP1	0	0	0	0	0	0	0	6	7	16	0	0	15	0	0	0	4	5	2	0	22	30	9	5	7	0	10	10	0	16	0	0	6	0	19	2	0	0	0	0	0	0	0	0	0	10	0	1	0
PDXDC1	1180	824	1070	461	255	1739	350	1513	2191	4185	1615	86	1506	544	960	625	1019	1840	327	1155	1609	2056	1261	1426	987	234	7183	3968	1207	4123	432	1149	1081	377	4346	1695	695	755	240	367	407	583	193	431	472	4296	794	1384	178
MIR4516	0	0	0	0	0	0	0	0	4	10	0	0	0	0	0	0	0	0	1	0	12	18	7	0	0	0	15	4	0	1	0	0	0	0	5	0	0	0	0	0	0	0	0	0	0	1	0	0	0
MIR3180-4	0	0	0	0	0	0	0	0	0	0	0	0	0	0	0	0	0	0	0	0	0	0	0	0	0	0	0	0	0	0	0	0	0	0	0	0	0	0	0	0	0	0	0	0	0	0	0	0	0
LOC105371096	0	0	0	0	0	0	0	0	0	0	4	0	2	0	0	0	0	0	0	0	0	4	0	0	0	8	0	0	0	0	0	0	0	0	0	0	0	0	0	0	0	0	0	0	0	0	2	0	0
LOC105371097	0	0	0	0	0	0	0	0	0	0	0	0	0	0	0	0	1	0	0	0	0	0	0	0	0	0	0	0	0	0	0	0	0	0	0	0	0	0	0	0	0	0	0	0	0	0	0	0	0
LOC107984870	0	0	0	0	0	0	0	0	0	0	0	0	0	0	0	0	0	0	0	0	0	0	0	0	0	0	0	0	0	0	0	0	0	0	0	0	0	0	0	0	0	0	0	0	0	0	0	0	0
LOC100652777	0	0	0	0	0	4	0	9	7	28	1	0	2	3	0	4	2	5	0	2	1	0	18	0	2	6	112	0	5	18	0	0	8	0	24	0	0	0	0	0	0	0	0	0	0	1	0	0	0
NPIPA3	1	0	2	0	0	4	2	0	8	21	2	0	0	0	1	0	1	9	2	0	10	29	9	0	4	0	12	45	6	50	5	2	1	0	8	0	0	0	0	0	1	0	0	0	0	6	0	0	0
LOC105371095	0	0	0	0	0	0	0	0	0	0	0	0	0	0	0	0	0	0	0	0	2	0	0	0	0	0	0	0	0	2	0	0	0	0	0	0	0	0	0	0	0	0	0	0	0	2	0	0	0
PLA2G10	16	38	18	14	6	95	11	84	123	467	32	2	94	62	51	19	19	125	2	103	20	25	55	24	43	16	463	148	61	1064	4	34	21	0	236	12	15	77	0	13	14	35	7	14	36	87	38	48	23
RNU7-125P	0	0	0	0	0	1	0	2	0	0	0	0	3	2	0	0	0	2	2	0	1	0	4	0	0	0	4	1	0	5	0	0	0	0	2	0	0	0	0	0	0	0	0	2	0	3	0	2	0
BFAR	178	153	251	103	48	257	84	312	506	939	197	12	290	94	205	151	172	547	79	489	469	451	446	190	268	53	1407	951	302	1071	102	299	237	54	675	233	151	150	72	85	51	126	17	110	148	680	210	258	49
RN7SL274P	0	0	0	0	0	0	0	0	0	0	0	0	0	0	0	0	0	0	0	0	0	1	0	0	0	0	0	0	0	0	0	0	0	0	0	0	0	0	0	0	0	0	0	0	0	0	0	0	0
LOC107984865	15	0	2	0	0	16	0	11	84	147	6	0	14	10	0	2	14	22	14	4	93	71	24	24	4	30	119	105	0	236	0	4	4	2	161	0	0	8	2	0	0	12	0	0	5	89	0	8	0
LOC105371094	10	0	0	0	0	2	0	2	8	28	0	0	0	6	0	2	0	8	0	11	20	27	8	3	0	0	26	14	0	59	0	0	0	0	18	1	2	0	0	0	0	2	0	0	2	19	0	2	0
LOC107987416	0	0	0	0	0	0	0	0	0	0	0	0	0	0	0	0	0	0	0	0	0	0	0	0	0	0	0	0	0	0	0	0	0	0	0	0	0	0	0	0	0	0	0	0	0	0	0	0	0
PARN	315	186	255	157	32	269	105	403	526	983	329	8	339	117	247	168	303	393	100	374	640	704	528	217	237	89	1259	800	262	1272	74	316	293	105	1004	227	152	148	46	76	55	130	39	145	212	600	231	311	22
CDIP1	87	82	139	42	31	139	46	114	236	429	108	4	184	68	120	58	51	403	87	114	309	305	279	227	115	59	638	446	90	114	65	110	153	84	227	133	84	65	34	52	24	51	20	63	73	87	81	142	10
HMOX2	298	187	166	171	56	244	162	283	681	676	256	26	392	78	278	147	243	654	125	492	413	538	534	264	335	227	1278	1105	254	413	95	342	199	228	475	315	219	113	44	91	57	119	68	127	199	667	251	238	46
NMRAL1	71	96	118	81	34	196	48	99	197	337	134	2	156	39	115	52	129	172	68	214	223	267	284	131	195	78	424	265	107	248	71	134	137	82	549	88	72	62	20	32	31	63	21	65	100	311	122	140	36
DNAJA3	159	127	230	162	47	179	56	127	452	518	270	10	225	54	135	85	292	387	91	173	413	374	269	220	122	104	1031	911	132	355	92	208	255	125	1226	225	131	113	41	56	39	73	12	68	153	832	147	194	22
VASN	45	10	8	16	8	22	42	36	188	326	8	0	28	8	45	10	38	60	41	69	357	1224	304	31	142	69	313	364	12	160	4	35	60	24	239	53	48	12	4	6	27	20	2	6	66	44	10	35	0
CORO7	14	2	15	9	4	38	2	21	40	68	34	0	13	10	13	16	13	66	4	51	54	98	51	37	2	8	186	66	2	93	23	51	32	2	126	54	30	6	10	10	5	6	4	3	14	80	6	14	0
PAM16	0	0	0	0	0	0	2	0	4	2	0	0	0	0	0	0	0	0	0	0	0	3	8	0	0	0	10	6	5	0	0	0	0	0	8	0	0	0	0	0	0	0	0	0	0	6	0	0	0
CORO7-PAM16	0	0	0	0	0	0	0	0	0	0	0	0	0	0	0	0	0	0	0	0	0	0	0	0	0	0	0	0	0	0	0	0	0	0	0	0	0	0	0	0	0	0	0	0	0	0	0	0	0
GLIS2-AS1	1	0	0	0	0	0	0	0	7	10	0	0	1	6	0	0	0	2	4	0	16	41	15	3	0	4	4	10	0	4	0	0	0	0	5	0	0	0	2	0	0	0	0	0	5	0	2	0	0
GLIS2	150	58	181	63	50	42	126	159	305	310	144	6	256	30	151	119	104	122	145	289	472	1392	1068	213	352	215	324	341	148	182	62	208	195	83	183	155	125	56	31	74	84	38	12	36	95	75	215	56	18
HS3ST6	1	2	0	0	0	0	1	0	0	2	0	0	2	0	2	0	2	4	0	2	1	2	0	0	4	22	2	0	0	0	0	0	4	0	4	5	4	2	0	0	0	0	0	0	0	0	0	0	0
LINC02124	0	0	0	0	0	0	0	0	0	0	0	0	0	0	0	0	0	0	0	0	0	0	0	0	0	0	0	0	0	0	0	0	0	0	0	0	0	0	0	0	0	0	0	0	0	0	0	0	0
LINC00254	0	0	0	0	0	0	0	0	0	0	0	0	0	0	0	0	0	0	0	6	0	0	2	0	0	0	0	0	0	0	0	0	0	0	0	0	0	0	0	0	0	0	0	0	0	0	0	0	0
CAPN15	591	125	261	186	98	1028	190	1219	6737	5977	1018	25	785	520	309	331	530	3364	142	319	1004	2222	1106	652	887	653	14893	12073	285	4131	206	511	508	252	4775	585	553	606	75	134	144	203	74	73	289	3610	379	735	95
LINC00235	0	0	0	0	2	6	0	0	7	6	0	0	2	0	0	0	4	4	0	2	17	22	4	2	0	12	16	8	0	4	0	0	0	0	25	0	0	0	0	0	0	0	0	0	0	13	4	0	0
LOC107987417	0	0	0	0	0	0	0	0	0	0	0	0	0	0	0	0	0	0	0	0	0	0	0	0	0	0	0	0	0	0	0	0	0	0	0	0	0	0	0	0	0	0	0	0	0	0	0	0	0
RAB11FIP3	302	118	265	112	67	609	191	356	640	1000	358	8	334	96	218	168	173	391	213	351	1050	2322	1099	366	696	413	1455	887	180	433	64	274	366	126	1289	272	253	179	43	94	97	97	32	65	243	524	284	432	32
DECR2	42	60	55	17	6	142	6	165	202	293	113	0	123	49	92	53	100	232	12	58	124	187	91	96	43	78	839	375	38	547	23	74	54	9	452	74	59	111	22	8	12	70	6	20	18	353	83	61	2
CPEB1	15	12	13	10	6	11	10	14	15	29	12	0	38	1	6	12	4	4	9	23	44	136	46	28	12	20	39	37	20	13	4	11	17	6	18	22	2	8	9	2	2	7	0	6	10	2	22	4	2
RPS17	1822	1397	2661	846	369	1724	544	1027	1375	1256	1447	102	1474	474	2063	1643	1789	1565	1175	2809	2275	1063	1891	2020	1153	207	1348	2346	1086	808	1616	1871	2314	725	2038	1850	1591	932	842	715	857	1285	477	1558	1619	2802	1297	1668	210
DNM1P38	0	0	0	3	0	0	4	0	2	5	0	0	0	0	0	0	0	0	0	2	2	8	2	4	0	4	2	7	0	0	0	0	0	0	0	0	0	0	2	4	0	0	0	0	0	13	0	5	0
LOC105370926	0	0	0	0	0	0	0	0	1	7	0	0	0	0	0	0	0	2	0	0	0	0	0	0	0	0	18	0	0	7	0	0	0	0	18	0	0	0	0	0	0	0	0	0	2	6	0	0	0
GOLGA2P10	48	68	38	43	14	113	65	215	452	703	48	10	121	48	95	37	71	116	78	95	191	638	344	47	307	164	1630	690	73	730	15	124	44	18	936	43	54	113	18	33	5	72	6	29	78	236	154	157	4
CSPG4P10	4	0	0	0	0	2	2	10	10	13	0	0	8	10	0	0	2	6	6	16	27	186	73	10	20	32	34	17	0	21	0	4	16	0	16	0	0	4	0	0	0	0	0	0	6	3	4	6	0
UBE2Q2P6	2	0	2	0	3	0	0	0	4	12	2	0	4	1	0	0	3	0	4	2	26	55	30	4	2	8	8	12	0	14	0	3	4	2	6	0	0	0	0	0	0	0	0	0	2	0	10	8	6
LOC102724034	0	0	0	0	0	0	0	0	0	0	0	0	0	0	2	0	0	0	0	0	0	1	0	0	0	0	4	0	0	0	0	0	0	0	0	0	0	0	0	0	0	0	0	0	2	0	0	0	0
GOLGA6L3	17	4	4	13	14	49	22	13	42	95	41	4	12	2	13	6	69	36	5	4	48	28	23	4	62	13	45	52	27	30	2	33	14	4	9	4	44	12	0	0	0	6	0	4	38	5	29	57	0
GOLGA6L9	101	89	28	26	26	90	135	205	349	249	114	6	89	6	65	20	66	43	33	71	124	359	183	31	353	16	499	445	60	423	8	169	42	7	319	20	56	76	16	26	12	66	11	33	133	186	92	122	3
RPL9P8	1327	1241	1984	808	257	932	514	1514	1008	715	1335	88	1257	319	1279	1281	840	1236	907	2369	2268	1147	2204	1815	1408	88	963	2073	1544	579	1047	2593	1844	675	1090	1861	994	829	460	548	993	818	346	1036	510	2097	1324	1052	246
UBE2Q2P2	33	9	4	16	11	41	16	52	80	183	23	0	14	10	21	2	19	29	18	12	72	144	74	40	63	8	199	147	25	291	4	21	8	2	161	8	14	26	4	12	8	31	2	15	8	87	31	41	0
GOLGA6L4	12	10	0	3	2	20	8	15	26	40	25	2	7	2	4	0	9	6	0	10	16	21	28	1	26	6	50	38	1	36	0	11	3	0	3	4	8	3	0	0	0	0	0	4	19	4	8	15	0
DNM1P41	4	0	0	0	0	0	0	4	0	2	10	0	2	0	9	0	4	0	2	4	12	54	2	0	0	0	51	14	2	20	6	22	0	0	0	0	0	0	0	2	0	2	0	4	0	2	0	0	0
LOC103171574	0	0	0	0	0	0	0	0	0	0	0	0	0	0	0	0	1	0	0	2	0	0	0	0	0	0	2	0	0	0	0	0	0	0	0	0	0	0	0	0	0	0	0	0	2	0	0	0	0
UBE2Q2L	8	0	2	0	5	0	0	2	6	5	0	0	0	0	1	0	0	0	0	0	5	27	2	0	3	0	2	0	0	4	0	0	0	0	2	0	0	0	0	0	0	0	0	0	0	0	0	0	0
LOC440300	0	7	0	0	1	0	0	4	7	13	1	3	0	0	0	0	4	2	2	8	18	30	6	0	4	0	23	13	4	16	0	2	4	0	4	1	0	6	0	0	0	0	0	2	0	4	0	1	0
LOC105379597	0	0	0	0	0	0	0	0	0	0	0	0	0	0	0	0	0	0	0	0	0	0	0	0	0	0	0	0	0	0	0	0	0	0	0	0	0	0	0	0	0	0	0	0	0	0	0	0	0
LOC101929479	1	0	2	4	0	0	0	2	7	27	6	1	6	0	2	4	7	7	4	7	23	38	9	4	0	7	26	8	11	33	1	2	3	0	15	0	4	2	0	0	1	2	4	1	0	13	6	3	0
GOLGA2P7	14	9	2	10	4	2	10	40	2	70	10	2	6	0	6	0	19	7	4	40	26	95	26	2	12	8	157	10	6	22	0	24	4	0	57	2	0	2	2	2	3	8	0	8	6	33	10	2	0
GOLGA6L10	15	8	16	2	2	36	26	38	64	85	40	24	23	4	20	0	33	25	18	16	37	73	104	10	80	32	160	101	11	72	4	17	23	5	56	10	10	22	0	10	4	10	0	3	10	58	21	27	0
DNM1P43	0	0	0	0	0	0	0	0	0	0	0	0	0	0	0	0	2	0	0	0	0	1	1	0	0	0	0	0	0	0	0	0	0	0	0	0	0	0	0	0	0	0	0	0	0	0	0	0	0
ADAMTS7P1	6	0	0	0	3	0	0	1	8	1	0	0	10	0	17	0	0	3	2	0	23	20	6	1	15	0	9	2	2	1	2	4	4	0	4	18	0	0	0	0	1	0	4	0	6	6	3	0	0
MIR4311	0	0	0	0	0	0	0	0	0	0	0	0	0	0	0	0	0	0	0	0	0	0	0	0	0	0	0	0	0	0	0	0	0	0	0	0	0	0	0	0	0	0	0	0	0	0	0	0	0
LOC105370867	0	0	0	0	0	0	0	0	2	0	0	0	0	0	0	0	0	0	0	0	2	0	0	0	0	0	0	0	0	0	0	0	0	0	0	0	0	0	0	0	0	0	0	0	0	0	0	0	0
MEGF11	40	10	6	6	6	32	15	19	213	332	8	0	29	22	20	13	21	137	29	21	299	286	93	41	5	37	338	422	2	468	6	6	10	6	304	4	6	17	0	6	4	21	0	2	21	277	0	51	2
RNU1-119P	0	0	0	0	0	0	0	0	0	0	0	0	0	0	0	0	0	0	0	0	0	0	0	0	0	0	0	0	0	0	0	0	0	0	0	0	0	0	0	0	0	0	0	0	0	0	0	0	0
LOC105370798	0	0	0	0	0	0	0	0	0	2	0	0	0	0	0	0	0	0	0	0	0	0	0	0	0	0	0	0	0	2	0	0	0	0	0	0	0	0	0	0	0	0	0	0	0	0	0	0	0
SORD2P	19	18	11	24	16	1	14	30	57	30	25	0	21	4	15	28	11	59	8	49	54	27	71	12	17	10	50	61	14	64	12	25	50	21	133	36	34	2	19	3	3	48	28	1	40	41	20	21	9
TRIM69	16	4	12	11	4	0	0	12	4	13	0	2	10	2	8	6	2	8	4	8	112	47	18	11	10	0	6	8	0	16	20	8	8	14	18	0	4	14	3	0	0	8	6	2	9	10	5	6	0
LOC100419583	181	127	310	134	77	363	65	159	210	577	183	2	213	46	169	109	130	529	47	179	481	349	287	283	152	17	622	414	227	388	127	329	327	102	401	268	160	92	56	60	79	141	55	176	290	221	92	194	64
MIR10393	0	0	0	0	0	0	0	0	0	0	0	0	0	0	0	0	0	0	0	0	0	0	0	0	0	0	0	0	0	0	0	0	0	0	0	0	0	0	0	0	0	0	0	0	0	0	0	0	0
B2M	8878	4351	7304	6646	1609	10941	1381	9255	6361	24604	3515	202	5948	2982	4683	4426	4893	13533	1484	9901	21053	14165	9874	5587	3836	603	23167	11186	12787	30527	6753	14152	9827	5356	12655	9411	4216	2783	2660	1630	945	4902	2028	3898	6757	8537	3691	6506	4037
PATL2	20	6	22	2	6	14	6	31	19	126	2	0	19	5	10	11	24	32	6	2	122	116	50	20	18	0	104	49	6	141	10	14	34	0	98	12	4	22	8	4	0	6	0	4	16	21	2	17	2
LOC107987422	0	0	0	0	0	0	0	0	0	0	0	0	0	0	0	0	0	0	0	0	0	0	0	0	0	0	0	0	0	0	0	0	0	0	0	0	0	0	0	0	0	0	0	0	0	0	0	0	0
CYFIP1	806	433	798	558	152	1563	285	1023	2288	3048	930	22	1069	336	753	575	742	2107	323	903	1367	2436	1690	922	782	202	5853	4229	609	3954	321	787	620	334	2868	997	467	477	215	116	237	392	121	357	419	3080	546	970	82
GOLGA8IP	2	0	0	3	0	0	4	0	0	8	0	0	0	0	0	0	2	4	0	0	4	10	13	0	3	10	0	2	9	2	0	8	0	6	3	0	0	2	0	0	0	0	0	0	0	0	0	0	0
RN7SL495P	0	0	0	0	0	0	0	0	0	0	0	0	0	0	0	0	0	0	0	0	0	0	0	0	0	0	0	0	0	0	0	0	0	0	0	0	0	0	0	0	0	0	0	0	0	0	0	0	0
LOC101927846	0	0	0	0	0	0	0	0	0	0	0	0	0	0	0	0	0	0	0	0	0	1	0	0	0	0	2	0	0	0	0	0	1	0	0	0	0	0	0	0	0	0	0	0	0	0	0	0	0
LOC100419579	0	0	0	2	0	0	2	6	17	36	1	0	0	5	0	6	9	2	2	0	20	55	8	8	0	0	42	22	0	52	2	0	2	0	61	0	0	1	0	0	0	0	0	0	2	13	8	1	0
HERC2P2	167	69	51	42	60	465	129	543	1012	2914	201	8	116	80	74	46	302	346	218	70	1597	1707	1634	309	451	323	3931	1936	110	3613	52	136	170	28	3121	75	43	256	16	40	26	70	4	48	211	1420	93	385	8
HERC2P7	4	0	0	0	0	0	0	2	1	4	2	0	0	0	4	0	0	1	0	0	3	2	1	0	0	0	4	2	0	6	0	0	0	0	1	0	0	0	0	0	0	0	0	0	5	4	0	4	0
LOC112268161	0	0	0	0	0	0	0	0	0	0	0	0	0	0	0	0	0	0	0	0	0	0	0	0	0	0	0	0	0	0	0	0	0	0	0	0	0	0	0	0	0	0	0	0	0	0	0	0	0
MPHOSPH10P9	0	0	0	0	0	0	0	0	0	0	0	0	0	0	0	0	0	0	0	0	0	0	0	0	0	0	0	0	0	0	0	0	0	0	0	0	0	0	0	0	0	0	0	0	0	0	0	0	0
GOLGA8EP	2	0	0	0	0	0	0	4	0	2	4	0	0	0	0	0	0	0	0	5	0	0	0	0	2	0	1	0	0	0	0	2	0	2	0	0	0	0	0	0	0	0	0	0	0	0	0	2	0
SPATA31E3P	0	0	0	4	0	0	0	0	0	0	0	0	0	0	0	0	0	0	0	0	2	0	0	0	0	0	2	0	0	0	0	0	0	0	0	0	0	0	0	0	0	0	0	0	0	0	0	0	0
LOC441711	0	0	4	0	0	2	0	0	4	6	1	0	6	0	4	0	5	6	0	2	9	7	1	5	0	0	14	16	1	14	2	0	5	0	6	0	4	2	0	6	2	1	0	0	0	22	0	0	0
LOC102724737	0	0	0	0	0	0	0	0	0	0	0	0	0	0	0	0	0	1	0	0	0	0	0	0	0	0	0	0	1	0	0	0	0	0	1	0	0	0	0	0	0	0	0	0	0	0	0	0	0
LOC107987218	0	0	0	0	0	0	0	0	0	0	0	0	0	0	0	0	0	0	0	0	0	0	0	0	0	0	0	0	0	0	0	0	0	0	0	0	0	0	0	0	0	0	0	0	0	0	0	0	0
FAM30C	0	2	0	0	0	0	0	0	0	0	1	0	0	0	0	2	0	0	0	0	3	0	0	0	0	0	0	0	0	0	0	0	0	0	0	0	0	0	0	0	0	0	0	0	0	0	0	0	0
OR4M2B	0	0	0	0	0	0	0	0	0	0	0	0	0	0	0	0	0	0	0	0	0	0	0	0	0	0	0	0	0	0	0	0	0	0	0	0	0	0	0	0	0	0	0	0	0	0	0	0	0
OR4H6P	0	0	0	0	0	0	0	0	0	0	0	0	0	0	0	0	0	0	0	0	0	0	0	0	0	0	0	0	0	0	0	0	0	0	0	0	0	0	0	0	0	0	0	0	0	0	0	0	0
LOC107987217	0	0	0	0	0	0	0	0	0	0	0	0	0	0	0	0	0	0	0	0	0	0	0	0	0	0	0	0	0	0	0	0	0	0	0	0	0	0	0	0	0	0	0	0	0	0	0	0	0
LINC02203	0	0	0	0	0	0	0	0	0	0	0	0	0	0	0	0	0	0	0	0	0	0	0	0	0	0	0	0	0	0	0	0	0	0	0	0	0	0	0	0	0	0	0	0	0	0	0	0	0
OR11J6P	0	0	0	0	0	0	0	0	0	0	0	0	0	0	0	0	0	0	0	0	0	0	0	0	0	0	0	0	0	0	0	0	0	0	0	0	0	0	0	0	0	0	0	0	0	0	0	0	0
OR11J2P	0	0	0	0	0	0	0	0	0	0	0	0	0	0	0	0	0	0	0	0	0	0	0	0	0	0	0	0	0	2	0	0	1	0	0	0	0	0	0	0	0	0	0	0	0	0	0	0	0
MIR5701-2	0	0	0	0	0	0	0	0	0	0	0	0	0	0	0	0	0	0	0	0	0	0	0	0	0	0	0	0	0	0	0	0	0	0	0	0	0	0	0	0	0	0	0	0	0	0	0	0	0
NF1P9	0	0	0	0	0	0	0	0	0	0	4	0	2	0	0	0	0	0	0	0	0	0	0	0	0	0	1	0	0	0	0	2	0	3	0	0	0	0	0	0	0	0	0	0	0	0	3	0	0
LOC105369227	0	0	0	0	0	0	0	0	0	0	0	0	0	0	0	0	0	0	0	0	0	0	0	0	0	0	0	0	0	0	0	0	0	0	0	0	0	0	0	0	0	0	0	0	0	0	0	0	0
LOC107984135	0	0	0	0	0	0	0	0	0	0	0	0	0	0	0	0	0	0	0	0	0	0	0	0	0	0	0	0	0	0	0	0	0	0	0	0	0	0	0	0	0	0	0	0	0	0	0	0	0
VN1R60P	0	0	0	0	0	0	0	0	0	0	0	0	0	0	0	0	0	0	0	0	0	0	0	0	0	0	0	0	0	0	0	0	0	0	0	0	0	0	0	0	0	0	0	0	0	0	0	0	0
RNU6-631P	0	0	0	0	0	0	0	0	0	0	0	0	0	0	0	0	0	0	0	0	0	0	0	0	0	0	0	0	0	0	0	0	0	0	0	0	0	0	0	0	0	0	0	0	0	0	0	0	0
MIR3118-3	0	0	0	0	0	0	0	0	0	0	0	0	0	0	0	0	0	0	0	0	0	0	0	0	0	0	0	0	0	0	0	0	0	0	0	0	0	0	0	0	0	0	0	0	0	0	0	0	0
POTEB3	0	8	0	0	0	0	3	8	1	0	0	0	0	0	1	0	0	5	0	3	0	0	0	0	4	0	0	0	0	0	0	0	0	4	0	2	0	0	0	0	0	0	0	0	0	0	0	0	2
GRAMD4P6	0	0	0	0	0	0	0	0	0	0	0	0	2	0	0	0	0	0	0	0	0	0	2	0	0	0	0	0	0	0	0	0	0	0	0	0	0	0	0	0	0	0	0	0	0	0	0	0	0
CXADRP2	22	8	0	0	0	24	8	26	53	41	2	0	0	20	3	18	2	10	4	4	4	5	16	9	0	0	171	58	10	68	2	10	12	0	22	2	4	6	0	0	0	2	0	2	0	48	14	16	2
LONRF2P4	0	0	0	0	0	0	0	2	0	0	1	0	0	0	0	4	0	0	0	0	0	0	0	0	0	0	0	0	0	0	0	0	0	0	0	0	0	0	0	0	0	0	0	0	0	0	0	0	0
RNU6-1235P	0	0	0	0	0	0	0	0	0	0	0	0	0	0	0	0	0	0	0	0	0	0	0	0	0	0	0	0	0	0	0	0	0	0	0	0	0	0	0	0	0	0	0	0	0	0	0	0	0
LOC105379593	0	0	0	0	0	0	0	0	0	0	0	0	0	0	0	0	0	0	0	0	0	0	0	0	0	0	0	0	0	0	0	0	0	0	0	0	0	0	0	0	0	0	0	0	0	0	0	0	0
LOC646214	3	4	2	10	0	0	1	7	0	10	2	0	8	2	12	0	2	4	2	1	29	4	22	0	0	2	3	25	1	12	2	2	1	3	0	3	4	0	0	0	5	0	2	0	3	4	4	0	0
LOC105370714	0	3	0	0	0	0	0	0	0	3	0	0	0	0	0	0	0	0	0	8	2	4	8	0	0	0	0	0	0	0	0	0	0	0	0	0	0	0	0	0	0	0	0	0	2	0	0	0	0
LOC105370715	0	0	0	0	0	0	0	0	0	0	0	0	0	0	2	0	0	0	0	0	0	0	0	0	0	0	0	0	0	0	0	0	0	0	0	0	0	0	0	0	0	0	0	0	0	0	0	0	0
NBEAP4	4	0	0	0	0	0	0	2	8	1	6	0	0	0	4	0	2	4	0	2	26	6	14	0	2	8	0	0	0	0	0	0	4	10	0	4	4	0	0	0	0	0	0	0	0	2	0	0	0
IGHV5-78	4	0	0	4	0	17	0	2	2	23	5	0	0	4	0	4	2	5	0	4	10	6	0	8	0	0	39	8	2	41	13	0	20	2	17	6	2	5	6	0	1	0	1	0	7	30	0	4	2
MIR5195	4	0	2	0	0	4	6	0	0	5	0	0	2	2	0	4	0	0	0	2	8	0	0	2	0	0	10	0	0	12	10	6	9	0	5	3	0	1	2	0	0	0	0	0	1	5	0	2	0
IGHVIII-76-1	0	0	0	0	0	0	0	0	2	0	0	0	0	0	0	0	0	0	0	0	0	2	0	0	0	0	0	0	0	0	0	0	0	0	0	0	0	0	0	0	0	0	0	0	0	0	0	0	0
IGHV3-76	0	0	0	0	0	0	0	0	4	0	0	0	0	0	0	0	0	0	0	0	4	2	0	0	0	0	0	2	0	0	0	0	0	0	0	0	0	0	0	0	0	0	0	0	0	0	0	0	0
IGHV3-75	0	0	0	0	0	0	0	0	0	2	0	0	0	2	0	0	0	0	0	0	3	0	2	0	0	0	0	0	2	0	0	0	0	0	0	0	0	0	0	1	0	0	0	0	0	0	0	0	0
IGHVII-74-1	0	0	0	0	0	0	0	0	0	0	0	0	0	0	0	0	0	0	0	0	0	0	0	0	0	0	0	0	0	0	0	0	0	0	0	0	0	0	0	0	0	0	0	0	0	0	0	0	0
IGHV3-74	193	161	439	532	425	139	146	263	96	584	94	25	368	117	16	184	57	170	113	209	639	495	273	428	191	34	28	222	630	214	1097	369	416	281	1	326	683	48	147	120	45	406	123	85	247	20	140	133	113
IGHV3-73	90	11	76	26	65	17	37	16	5	129	10	0	15	20	0	28	22	4	9	25	323	30	77	758	53	6	6	2	124	49	73	300	155	22	9	674	93	1	51	24	4	64	4	63	55	58	40	17	124
IGHV3-72	150	104	220	111	187	103	28	188	56	170	46	10	248	50	17	107	14	73	43	158	260	180	126	185	40	24	10	63	647	160	156	69	238	148	4	205	356	43	13	105	16	195	124	45	146	19	48	84	74
IGHV3-71	16	33	52	21	38	15	3	30	2	46	2	2	12	10	15	11	5	10	2	12	122	46	20	34	6	9	7	3	22	13	39	45	34	62	1	24	39	10	13	15	9	15	14	12	17	2	3	7	16
IGHV2-70	59	10	114	224	36	14	25	51	0	79	6	3	21	14	49	35	76	13	11	66	86	70	37	58	43	22	2	10	26	21	425	155	99	11	0	33	70	113	105	12	4	70	33	47	60	5	24	12	76
IGHV1-69D	264	80	370	431	165	26	52	195	14	179	20	12	119	310	46	409	99	563	83	458	1200	471	159	639	102	28	26	24	155	155	1749	686	407	339	5	111	264	19	296	131	40	131	16	196	538	27	85	39	275
IGHV1-69-2	0	2	47	2	0	0	7	3	0	6	0	0	0	0	0	5	0	1	3	0	8	9	6	2	2	0	0	0	2	2	0	3	6	819	2	0	1	0	6	2	0	13	0	2	5	0	1	1	0
IGHV3-69-1	21	19	46	100	55	13	6	81	7	87	20	4	57	44	10	27	5	37	21	43	189	62	40	31	15	0	5	13	54	10	104	133	57	41	3	107	104	13	21	17	26	45	10	46	187	10	32	19	31
IGHV2-70D	8	1	38	71	5	7	3	39	0	11	0	3	22	9	7	42	6	31	4	25	91	118	9	12	9	14	5	1	12	12	203	26	43	36	0	21	12	63	6	11	9	15	4	8	46	1	16	7	59
IGHV1-69	68	13	138	100	53	20	35	36	8	90	2	5	21	93	20	164	46	158	23	83	446	192	36	84	23	13	15	8	55	49	469	100	165	125	1	43	91	10	79	76	14	54	7	15	175	8	32	11	115
IGHV1-68	0	0	0	2	0	0	0	0	0	2	1	0	0	0	0	0	0	0	0	3	0	0	4	0	0	0	0	0	0	0	0	0	2	0	0	0	0	0	0	0	0	0	0	0	4	0	0	0	0
IGHVIII-67-4	0	2	0	0	0	0	0	0	0	2	0	0	0	0	0	0	0	0	0	0	0	0	0	0	0	0	0	0	0	0	0	0	0	0	4	0	0	0	0	0	0	0	0	0	0	0	0	0	0
IGHVIII-67-3	0	0	0	0	0	0	0	0	0	0	0	0	0	0	0	0	0	0	0	0	0	0	0	0	0	0	0	0	0	0	0	0	0	0	0	0	0	0	0	0	0	0	0	0	0	0	0	0	0
IGHVIII-67-2	0	0	0	0	0	0	0	0	0	0	0	0	0	0	0	0	0	0	0	0	0	0	0	0	0	0	0	0	0	0	0	0	0	0	0	0	0	0	0	0	0	0	0	0	2	0	0	0	0
IGHVII-67-1	0	0	0	0	0	0	0	0	0	0	0	0	0	0	0	0	0	0	0	0	0	0	0	0	0	0	0	0	8	0	0	2	0	0	0	0	0	0	0	0	0	0	0	0	0	0	0	0	0
SLC20A1P1	0	0	0	2	0	0	2	0	0	0	0	0	0	0	0	0	0	0	0	0	0	2	0	0	0	9	0	0	0	0	0	0	0	0	0	0	0	0	0	0	0	0	0	0	0	0	2	0	0
IGHV1-67	0	0	1	4	0	0	0	2	0	0	0	0	2	10	0	0	4	6	0	0	13	7	1	5	0	0	0	0	2	1	3	3	0	2	0	4	4	1	0	0	0	0	0	5	1	0	0	0	0
IGHV3-66	102	38	132	120	51	76	31	100	26	106	10	3	50	17	19	49	16	155	32	114	157	330	60	135	34	23	3	50	77	76	51	330	62	151	9	128	128	15	63	57	33	61	19	112	240	5	57	34	82
IGHVII-65-1	0	0	0	0	0	0	0	0	0	0	0	0	0	0	0	0	0	0	0	0	0	0	0	0	0	0	0	0	0	0	0	0	0	0	0	0	0	0	0	0	0	0	0	0	0	0	0	0	0
IGHV3-65	2	0	16	4	0	2	0	0	0	8	2	0	1	0	0	1	0	0	3	1	7	4	0	2	1	0	0	6	15	0	5	2	0	0	0	0	5	0	0	4	0	0	0	6	13	0	6	3	7
LOC102724977	0	0	0	0	0	0	0	0	0	0	0	0	0	0	0	0	0	0	0	0	0	0	0	0	0	0	0	0	0	0	0	0	0	0	0	0	0	0	0	0	0	0	0	0	0	0	0	0	0
IGHV3-64	0	3	32	25	0	21	1	13	2	12	4	0	17	1	0	6	1	2	4	12	15	8	8	12	16	0	0	3	4	9	27	10	11	7	2	20	22	7	2	7	10	22	5	0	14	0	8	13	1
GOLGA4P3	0	0	0	0	0	0	0	0	0	0	0	0	0	0	0	0	0	0	0	0	0	0	0	0	0	0	0	0	0	0	0	0	0	0	0	0	0	0	0	0	0	0	0	0	0	0	2	0	0
IGHV3-63	3	0	0	0	2	0	1	2	0	4	0	0	0	0	0	0	0	2	2	0	26	4	0	0	0	0	0	0	0	1	0	10	6	5	0	4	2	0	0	0	0	0	0	0	0	0	0	0	0
IGHVII-62-1	0	0	0	0	0	0	0	0	0	0	0	0	0	0	2	0	0	2	0	0	0	0	0	0	0	0	0	0	0	0	0	0	0	0	0	0	0	0	0	0	0	0	0	0	0	0	0	0	0
IGHV3-62	14	4	15	15	44	10	0	13	0	23	20	0	9	11	14	12	19	19	16	19	66	36	8	25	36	55	2	3	17	8	19	44	7	45	0	7	22	14	2	15	12	7	2	13	47	4	2	4	3
IGHV4-61	113	79	363	165	74	53	82	171	45	186	90	15	152	192	64	121	32	196	90	243	285	387	169	222	544	36	12	109	325	165	532	437	370	184	7	203	216	135	216	81	33	138	73	104	344	7	156	62	185
IGHVII-60-1	0	0	0	0	0	0	2	0	0	0	0	0	2	0	0	0	0	2	0	0	2	2	0	2	4	0	0	0	0	0	0	0	0	0	0	0	0	1	0	0	0	0	0	0	0	0	0	0	0
RNA5SP389	0	0	0	0	0	0	0	0	0	0	0	0	0	0	0	0	0	4	0	1	34	0	0	0	0	0	0	0	0	0	0	0	0	0	0	0	2	0	0	0	0	0	0	0	0	0	0	0	0
IGHV3-60	1	0	0	0	0	0	0	0	0	2	0	0	0	0	0	0	0	2	0	0	2	2	2	0	0	0	0	0	0	0	25	0	0	0	0	1	0	0	0	0	0	0	0	0	3	0	2	0	0
IGHV4-59	510	397	1588	2375	232	387	260	660	202	455	176	35	721	785	518	1239	111	978	356	1177	2941	1209	670	745	736	166	49	371	1251	1134	2952	2317	690	1911	35	946	865	621	749	318	177	480	321	592	2333	33	702	278	1281
IGHV1-58	75	4	235	135	22	3	4	31	1	25	0	0	89	3	69	79	3	107	0	2	143	154	7	153	2	4	8	12	12	6	66	143	28	25	0	41	78	51	35	5	3	2	23	28	56	9	4	1	19
IGHV3-57	0	0	0	0	0	0	0	0	0	0	0	0	0	0	0	0	0	0	0	0	0	0	0	0	0	0	0	0	0	0	0	3	0	0	0	0	0	0	0	0	0	0	0	0	0	0	0	0	0
IGHV7-56	0	1	0	0	0	0	0	0	1	0	0	0	0	0	0	0	0	0	0	0	3	0	0	0	0	8	2	0	1	0	4	0	0	2	2	0	4	0	0	0	0	0	0	0	1	0	0	0	0
IGHV4-55	26	23	55	4	28	23	7	37	9	27	18	0	17	21	21	33	4	63	6	196	39	44	10	25	22	17	3	8	43	47	69	118	30	100	0	155	51	38	69	6	5	40	18	91	129	9	5	9	28
IGHV3-54	0	0	0	0	0	0	0	0	0	0	0	0	0	0	0	0	0	0	0	0	3	0	0	0	0	0	0	0	0	0	0	0	2	0	0	0	0	0	0	0	0	0	0	0	0	0	0	0	0
IGHVII-53-1	0	0	0	0	0	0	0	0	0	0	0	0	0	0	0	0	1	0	0	10	0	0	0	0	0	0	0	0	0	0	0	0	0	0	0	0	0	0	0	0	0	0	0	0	0	0	0	0	0
IGHV3-53	133	10	228	103	82	24	27	97	17	265	16	2	40	72	37	88	32	163	48	77	199	114	46	184	60	12	10	56	53	88	112	302	283	96	6	133	99	27	87	24	23	97	42	65	51	6	20	33	188
IGHV3-52	8	4	12	7	39	8	0	1	2	3	7	0	4	3	4	9	2	13	0	6	13	16	9	2	4	8	2	0	11	4	4	16	3	0	0	5	6	0	2	0	2	8	0	2	18	0	2	0	2
IGHVII-51-2	0	0	0	0	0	0	0	0	0	0	2	0	0	0	0	0	0	0	0	0	0	0	0	0	0	0	0	0	0	0	0	0	0	0	0	0	0	0	0	0	0	0	0	0	0	0	0	0	0
IGHV8-51-1	0	0	0	0	0	0	0	0	0	2	0	0	0	0	0	0	0	0	0	0	0	0	0	0	0	0	0	0	0	0	0	2	0	2	0	0	0	0	0	1	0	0	0	0	0	0	2	0	0
IGHV5-51	1191	115	1368	1279	343	170	74	500	92	337	117	25	502	608	252	254	165	330	403	1196	1183	254	316	813	246	537	27	141	585	589	1840	1276	722	309	21	500	290	209	426	185	87	478	132	383	604	91	246	114	789
IGHV3-50	0	0	0	0	0	0	0	0	0	0	0	0	0	0	0	0	0	0	0	0	0	0	0	0	0	0	0	0	0	0	0	2	0	0	0	0	0	0	0	0	0	0	0	0	0	0	0	0	0
IGHVII-49-1	0	0	0	0	0	0	0	0	0	0	0	0	0	0	0	0	0	0	0	0	0	0	0	0	0	0	0	0	0	0	0	0	0	0	0	0	0	0	0	0	0	0	0	0	0	0	0	0	0
IGHV3-49	113	75	250	240	116	132	14	144	63	120	87	25	199	41	51	69	19	17	57	67	376	448	97	147	95	11	8	85	421	56	399	366	74	78	2	170	185	34	94	61	19	146	47	130	303	21	59	95	248
IGHV3-48	157	185	834	1198	595	167	119	401	53	259	75	25	337	113	78	188	19	80	134	257	1288	600	283	275	162	52	56	73	470	106	854	894	769	113	9	931	488	111	126	190	65	454	89	440	569	6	180	111	204
IGHVIII-47-1	0	0	0	0	0	0	0	0	0	0	0	0	0	0	0	0	0	0	0	0	0	0	0	0	0	0	0	0	0	0	0	0	0	0	0	0	0	0	0	0	0	0	0	0	0	0	0	0	0
IGHV3-47	8	0	0	4	5	0	2	2	0	2	0	0	0	0	5	0	2	3	2	0	25	2	2	1	6	1	0	0	6	2	4	46	2	10	2	8	4	0	1	6	0	0	4	2	2	0	0	0	1
IGHVII-46-1	0	0	0	0	0	0	3	0	0	0	0	0	0	0	3	0	0	0	0	0	0	0	0	0	0	0	0	0	0	0	0	0	0	0	0	0	0	0	0	0	0	0	0	0	0	0	0	0	0
IGHV1-46	577	288	222	865	144	170	81	285	39	307	91	9	447	225	74	586	117	1015	30	668	845	394	162	112	345	40	58	103	283	215	340	447	1647	484	16	248	485	93	157	49	39	225	30	49	458	8	103	132	739
IGHV1-45	0	0	0	0	2	0	0	0	0	0	1	0	5	2	0	0	2	0	0	14	18	0	1	4	2	0	2	0	5	3	0	47	0	3	0	0	1	1	0	0	1	0	0	10	4	0	0	0	0
IGHVII-44-2	0	0	0	0	0	0	0	0	0	0	0	0	0	0	0	0	0	0	0	0	0	0	0	0	0	0	0	0	0	0	0	0	0	0	0	0	0	0	0	0	0	0	0	0	0	0	0	0	0
IGHVIV-44-1	0	0	0	2	0	0	0	0	4	0	0	0	0	0	0	0	0	0	0	0	0	0	0	0	0	0	0	0	0	0	0	0	0	6	0	0	0	0	0	2	0	0	0	0	4	0	0	0	0
LINC00221	0	0	0	0	0	0	8	8	0	0	0	0	0	0	0	0	0	0	0	0	2	0	0	0	0	0	0	0	0	0	0	6	0	0	0	0	0	0	0	0	0	2	0	0	0	0	2	0	0
IGHVIII-44	0	0	0	0	0	0	0	0	0	0	0	0	0	0	0	0	0	0	0	0	0	0	0	0	0	0	0	0	0	0	0	0	2	0	0	0	0	0	0	0	0	0	0	0	0	0	0	0	0
IGHVII-43-1	0	0	0	0	0	0	0	0	0	0	0	0	0	0	0	0	0	0	0	0	0	0	0	0	0	0	0	0	0	0	0	0	0	0	0	0	0	0	0	0	0	0	0	0	0	0	0	0	2
IGHV3-43	544	9	52	203	39	31	20	117	21	60	27	6	57	41	33	58	27	77	30	244	154	90	65	72	181	10	12	17	95	26	428	229	175	462	6	142	116	19	44	39	31	112	20	64	100	8	54	22	50
IGHV3-42	0	0	0	0	0	0	0	0	0	0	0	0	0	2	0	0	1	0	0	0	0	0	4	4	0	0	0	0	1	0	0	6	0	0	0	0	2	0	0	0	0	0	0	0	7	0	0	0	0
HOMER2P1	2	2	4	2	0	0	2	6	2	0	2	0	4	0	0	0	0	0	0	0	0	8	0	0	8	0	6	0	0	2	0	2	2	0	0	2	4	0	0	2	0	0	0	0	0	0	0	0	0
IGHV3-41	4	9	2	19	5	0	0	4	1	5	7	0	5	5	1	6	6	19	14	2	83	8	6	15	1	0	0	0	6	5	16	105	8	14	0	34	16	1	8	6	0	12	0	21	4	3	2	7	1
IGHVII-40-1	0	0	0	0	0	0	0	0	0	0	0	0	0	0	0	2	0	0	0	0	0	0	0	0	0	0	0	0	0	0	0	0	0	0	0	0	0	0	0	0	0	0	0	0	0	0	0	0	0
IGHV7-40	0	0	0	0	0	0	0	0	0	0	0	0	0	0	0	0	1	2	0	0	0	0	0	0	0	0	0	0	0	0	0	2	0	0	0	2	0	0	0	0	0	0	0	0	0	0	0	0	0
IGHV4-39	659	335	804	1885	520	203	198	607	169	618	104	46	424	1060	181	695	140	577	290	522	2799	528	472	828	566	82	81	332	1012	515	3624	2330	1120	473	30	1101	852	379	708	222	182	652	216	771	751	62	589	162	1168
IGHVIII-38-1	0	0	0	0	0	0	0	0	0	0	0	0	0	0	0	0	0	0	0	0	0	0	0	0	0	0	0	0	0	0	0	0	0	0	0	0	0	0	0	0	0	0	0	0	0	0	0	0	0
IGHV3-38	5	3	9	4	0	0	0	5	4	11	2	0	16	11	0	1	1	8	0	8	18	7	6	7	4	8	0	3	3	2	13	40	14	8	2	0	13	0	0	0	0	6	0	2	11	0	15	0	3
IGHV3-37	0	0	0	0	0	0	0	0	0	0	0	0	0	0	0	0	2	0	0	0	0	0	0	0	0	0	2	0	0	2	0	0	0	0	0	0	0	0	0	0	0	0	0	0	0	0	0	0	0
IGHV3-36	2	0	0	0	0	0	0	0	0	10	14	0	2	0	0	0	0	0	0	0	0	0	2	0	0	0	0	0	0	0	0	0	0	0	0	0	2	0	0	0	0	0	0	0	0	0	1	0	0
IGHV3-35	2	0	3	5	2	3	0	0	0	8	2	0	2	4	0	9	0	2	0	0	27	17	6	14	4	6	1	0	6	2	9	9	4	4	2	11	5	2	0	4	0	2	1	1	5	2	2	2	2
IGHV7-34-1	10	2	15	0	2	0	2	2	0	11	1	0	4	2	2	1	0	13	0	0	13	7	4	8	9	0	4	0	2	0	6	0	0	3	4	0	10	0	10	0	0	1	0	0	1	0	0	0	1
IGHV4-34	155	66	193	370	120	272	140	764	50	185	130	9	139	205	9	597	100	286	178	330	643	280	129	431	61	64	36	60	99	256	2553	243	1118	613	5	688	298	169	283	112	133	372	241	74	938	48	44	164	654
IGHV3-33-2	0	0	0	0	0	0	0	0	0	2	0	0	0	0	0	0	0	0	2	0	0	0	0	2	0	0	0	0	0	0	0	0	0	0	0	0	0	0	0	0	0	0	0	0	2	0	0	0	0
IGHVII-33-1	0	0	0	0	0	0	0	0	0	0	0	0	0	0	0	0	0	0	0	0	0	0	2	0	0	0	0	0	0	0	0	0	0	0	0	0	0	0	0	0	0	0	0	0	0	0	0	0	0
IGHV3-33	372	137	267	149	301	114	129	345	78	344	65	4	191	71	55	215	52	131	227	452	308	265	161	387	215	46	22	127	402	275	812	435	275	214	11	337	343	152	264	84	39	213	175	158	138	66	106	72	170
GOLGA4P1	0	0	1	0	0	0	0	0	0	0	0	0	0	0	0	0	0	0	0	6	0	0	0	0	0	0	0	0	0	0	0	0	1	0	0	0	0	0	0	0	0	0	0	0	0	0	0	0	0
IGHV3-32	0	0	0	0	0	0	0	0	0	2	0	0	0	0	0	0	0	0	0	0	0	0	0	2	0	0	0	0	0	1	2	0	0	0	2	0	0	0	0	0	0	0	0	0	0	0	0	0	0
IGHVII-30-21	0	0	0	0	0	0	0	0	0	0	0	0	0	0	0	0	0	2	0	0	0	0	2	0	0	0	0	0	0	0	0	0	0	0	0	0	0	0	0	0	0	0	0	0	0	0	0	0	0
IGHV4-30-2	71	21	93	7	16	5	21	43	13	39	22	4	13	34	25	3	0	86	47	425	8	71	70	45	34	28	3	50	61	28	225	738	25	143	0	149	125	63	149	6	15	17	46	137	59	1	42	0	28
IGHV3-30-2	0	0	0	0	0	0	0	0	0	0	0	0	0	0	0	0	0	2	2	0	8	0	0	2	0	0	0	0	0	0	0	0	0	0	2	0	0	0	0	0	0	0	0	0	0	2	0	0	0
IGHVII-30-1	0	0	0	0	0	0	0	0	0	0	0	0	0	0	0	0	0	0	0	0	0	0	0	0	0	0	0	0	0	0	0	0	0	0	0	0	0	0	0	0	0	0	0	0	0	0	0	0	0
IGHV3-30	643	154	329	402	325	78	217	335	77	263	93	16	259	190	57	242	49	145	258	835	1557	464	379	374	230	65	31	158	490	185	1124	1369	514	329	20	315	478	175	517	172	89	335	243	340	386	11	128	73	109
GOLGA4P2	0	0	0	0	0	0	0	0	0	0	0	0	0	0	0	0	0	0	0	0	0	0	0	0	0	0	0	0	0	0	2	0	0	0	0	0	0	0	0	0	0	0	0	0	0	0	0	0	0
IGHV3-29	0	0	0	0	0	0	0	0	0	0	0	0	0	0	0	0	0	0	0	0	0	0	0	0	0	0	0	0	0	0	0	0	0	0	4	0	0	0	0	0	0	0	0	0	0	0	0	0	0
IGHVII-28-1	0	0	0	0	0	0	0	0	0	0	0	0	0	0	0	0	0	0	0	0	0	0	0	0	0	0	0	0	0	0	0	0	0	0	0	0	0	0	0	0	0	0	0	0	0	0	0	0	0
IGHV4-28	34	36	38	30	7	8	4	12	52	25	7	0	13	36	12	43	7	26	6	38	56	56	27	57	25	17	3	52	66	29	108	175	81	74	2	17	143	85	27	4	4	18	3	6	91	3	16	4	100
IGHV7-27	0	1	0	0	1	0	0	0	0	4	0	0	0	2	0	0	0	4	0	2	2	0	2	0	0	0	0	0	11	0	0	0	0	0	0	2	0	0	0	0	0	0	0	0	0	0	0	0	0
IGHVII-26-2	0	0	0	0	0	0	0	0	0	0	0	0	2	0	0	0	0	2	0	0	0	0	0	0	0	0	0	0	0	0	0	12	0	0	0	0	0	0	0	0	0	0	0	0	2	0	0	0	0
IGHVIII-26-1	0	0	0	0	0	0	0	0	0	0	0	0	0	0	0	0	2	0	0	0	0	0	0	0	0	0	0	0	0	0	0	0	0	0	0	0	0	0	0	0	0	0	0	0	0	0	0	0	0
IGHV2-26	3	4	19	20	18	10	2	31	5	17	6	1	0	62	16	139	13	20	2	26	9	45	19	66	13	0	4	5	6	5	132	175	17	0	2	26	20	4	331	7	16	21	7	41	58	5	8	6	10
IGHVIII-25-1	0	0	0	0	0	0	0	0	0	0	0	0	0	0	0	0	0	0	0	0	0	0	0	0	0	0	0	0	0	0	0	0	0	0	0	0	0	0	0	0	0	0	0	0	0	0	0	0	0
IGHV3-25	0	0	4	2	0	0	0	3	0	4	0	0	0	0	1	0	0	0	0	0	8	0	1	0	3	1	0	0	0	2	3	2	0	0	0	0	3	0	0	0	0	0	0	0	0	0	0	0	0
LINC00226	0	0	0	0	0	0	0	0	0	0	2	0	0	0	0	0	0	0	0	0	0	0	2	0	0	0	0	0	0	0	0	0	0	0	0	0	0	0	0	0	0	0	0	0	0	0	0	0	0
HOMER2P2	4	0	0	0	0	0	0	0	0	0	0	0	4	0	0	0	0	0	0	0	2	0	2	0	0	0	0	0	0	0	0	2	0	0	2	0	0	0	0	0	0	0	1	0	0	0	0	0	0
IGHV1-24	76	30	176	173	31	24	25	23	4	125	10	4	45	44	2	71	46	69	18	131	62	37	57	86	56	16	13	6	62	20	70	563	255	71	1	81	59	68	193	14	5	25	24	73	55	11	26	5	71
IGHV3-23	963	931	2183	2808	795	1117	233	1218	346	2135	265	78	781	858	495	1062	171	1282	434	1378	2022	1741	678	2484	690	317	175	525	2541	1679	1584	6245	1526	2633	62	4583	2261	456	563	918	160	1287	393	2128	1475	148	887	668	634
IGHVIII-22-2	0	1	0	0	0	0	2	0	0	0	0	0	0	0	0	0	0	0	0	0	0	0	0	0	0	0	0	0	0	0	0	0	0	0	0	0	0	0	0	0	0	0	0	0	0	0	0	0	0
IGHVII-22-1	0	0	0	0	0	0	0	0	0	0	0	0	0	0	12	0	0	0	0	3	7	0	0	0	0	0	0	0	0	0	0	0	0	0	0	0	0	0	0	0	0	0	0	0	1	0	0	0	0
IGHV3-22	1	8	8	4	6	2	0	5	4	15	0	0	14	14	0	11	2	4	2	22	63	8	3	27	2	4	1	2	16	4	8	23	6	16	0	6	13	1	0	5	1	4	0	18	4	0	0	4	3
IGHV3-21	220	219	839	870	455	246	208	391	64	335	84	58	335	415	397	362	70	255	161	648	1557	618	325	574	257	137	29	176	464	340	726	2536	1571	872	19	726	470	318	267	268	91	686	114	930	590	30	161	131	687
IGHVII-20-1	0	0	0	0	0	0	0	0	0	0	0	0	0	0	0	0	0	0	0	0	0	0	0	0	0	0	0	0	0	0	0	0	0	0	0	0	0	0	0	0	0	0	0	0	0	0	0	0	0
IGHV3-20	52	60	133	240	87	58	46	178	28	313	28	3	99	66	6	51	29	88	44	223	486	456	139	197	128	47	43	13	365	23	722	598	108	89	12	139	169	49	79	44	72	122	59	264	613	12	111	26	50
LOC105370700	0	0	0	0	0	0	0	4	0	2	0	0	0	0	0	0	0	0	0	0	2	2	0	0	0	10	0	0	10	0	0	0	2	0	0	0	0	0	0	0	0	0	0	0	0	0	0	0	0
IGHV3-19	9	7	17	56	4	13	5	7	2	17	1	0	14	5	7	9	3	43	1	2	115	18	4	13	4	4	6	3	14	6	10	53	8	6	0	27	15	5	4	7	0	5	0	37	15	2	5	1	9
IGHV1-18	81	98	538	521	274	16	32	196	41	199	47	12	214	144	79	178	70	251	80	314	1099	263	177	326	206	51	12	54	316	158	861	407	307	389	2	381	182	221	209	176	29	378	141	139	296	16	114	38	514
SLC20A1P2	0	0	0	6	0	0	2	0	0	0	6	0	0	0	4	0	0	0	0	8	2	0	0	0	0	0	0	0	0	1	0	0	0	0	0	0	0	0	0	0	0	0	0	0	0	0	0	0	0
IGHV1-17	0	0	1	0	0	0	0	1	0	0	0	0	0	0	0	0	0	0	0	0	0	0	0	0	0	0	0	0	0	0	1	0	0	0	0	0	0	0	0	0	0	0	0	0	0	0	0	0	0
IGHVIII-16-1	0	0	0	0	0	0	0	0	0	0	0	0	0	0	0	0	0	0	0	0	0	0	0	0	0	0	0	0	0	0	0	0	0	0	0	0	0	0	0	0	0	0	0	0	0	0	0	0	0
IGHV3-16	4	2	21	9	19	6	2	25	8	15	18	0	10	4	5	9	0	5	2	12	19	6	1	35	6	11	4	5	18	6	18	54	25	23	0	32	16	8	2	6	3	7	2	32	6	4	9	5	9
IGHVII-15-1	0	0	0	0	0	0	2	0	0	0	0	0	0	0	0	0	0	0	0	2	0	0	0	0	0	0	0	0	0	0	0	0	0	0	0	0	0	0	0	0	0	0	0	0	0	0	0	0	0
IGHV3-15	230	214	703	366	211	182	98	426	61	443	115	12	270	151	117	352	50	65	65	251	2558	212	330	377	178	50	20	119	702	284	563	629	627	158	3	531	459	63	81	97	51	365	77	224	350	22	1804	146	230
IGHV1-14	0	0	0	2	0	0	0	0	0	1	0	0	0	0	0	0	0	4	4	0	12	0	2	2	4	0	0	0	0	2	2	0	0	0	0	5	2	0	3	0	0	0	0	0	2	0	2	0	0
IGHVIII-13-1	0	0	0	0	0	0	0	0	0	0	0	0	0	0	0	0	0	0	0	0	0	0	0	0	0	0	0	0	2	0	0	0	0	0	0	0	0	0	0	0	0	0	0	0	0	0	6	0	2
IGHV3-13	73	23	132	41	21	31	14	64	20	93	24	0	57	11	139	14	11	9	41	23	138	36	36	163	50	11	13	57	176	37	88	982	82	577	1	452	113	27	35	21	5	54	13	391	14	15	56	13	110
IGHV1-12	12	4	9	13	0	2	0	3	1	8	1	1	5	3	2	0	0	8	1	10	93	5	2	13	6	0	5	0	5	2	3	5	7	7	2	6	5	1	4	9	3	8	2	5	18	0	38	0	130
IGHVIII-11-1	0	0	0	0	0	0	0	0	0	2	0	0	0	0	0	0	0	0	0	0	0	2	0	0	0	0	0	0	0	0	1	0	0	0	0	4	0	1	0	0	0	0	0	0	0	0	0	0	0
IGHV3-11	181	54	364	453	403	107	103	348	69	393	84	15	280	330	21	176	136	177	169	347	423	598	235	387	155	133	36	175	540	315	829	863	581	549	19	230	463	386	242	137	78	428	92	325	301	30	143	87	196
IGHV5-10-1	112	16	731	557	41	28	42	48	23	37	33	3	88	360	40	210	80	85	12	252	140	62	65	111	16	92	1	20	95	109	356	52	182	30	7	27	56	119	180	34	5	162	30	23	110	6	99	18	76
IGHV3-64D	2	42	228	108	13	81	38	9	23	5	20	0	7	181	112	41	17	21	4	92	131	149	56	30	7	0	0	47	290	138	20	50	40	14	0	10	8	6	43	14	25	77	42	17	23	2	71	40	1302
IGHV3-7	750	216	783	1779	953	274	162	1036	93	992	145	17	619	436	128	1009	96	768	592	672	5040	761	275	1049	248	115	54	168	992	495	2145	8120	632	1395	23	1435	1310	187	1109	563	133	617	172	3195	727	90	161	222	600
IGHV3-6	0	0	2	2	2	0	4	2	0	12	2	0	0	0	0	4	0	10	0	2	96	6	2	0	8	0	0	2	0	0	2	7	7	2	0	16	10	0	2	0	0	1	0	2	8	0	0	3	2
IGHVIII-5-2	0	0	0	0	0	0	2	0	0	0	2	0	0	0	0	0	0	0	0	0	0	0	0	4	0	18	0	0	0	0	0	0	0	0	0	0	0	0	0	0	0	0	0	0	0	0	0	0	0
IGHVIII-5-1	0	0	0	0	0	0	0	0	0	0	0	0	0	0	0	0	0	0	0	0	0	0	0	0	0	0	0	0	0	0	0	0	0	0	0	2	0	0	0	0	0	0	0	0	0	0	0	0	0
IGHV2-5	892	64	284	538	400	90	34	177	35	353	65	16	167	441	72	291	91	393	284	683	66	956	244	391	197	66	83	83	225	92	1800	1110	908	987	13	269	388	149	605	87	177	289	84	285	710	11	76	66	155
IGHV7-4-1	631	121	31	18	299	7	52	200	5	55	55	0	91	446	0	190	133	169	91	625	209	398	152	604	161	48	3	1	459	8	1069	4384	298	401	15	267	404	200	454	8	67	123	61	1236	352	17	114	3	98
IGHV4-4	37	30	149	147	35	24	20	207	10	109	29	7	22	84	35	197	74	386	60	160	238	50	64	412	34	16	14	21	22	136	710	28	274	139	0	365	72	119	96	30	62	75	71	24	504	119	12	16	367
LOC107984634	0	0	0	0	0	0	0	1	0	0	2	0	0	0	0	0	2	7	0	7	11	10	2	2	0	0	0	0	5	0	1	4	6	0	2	0	12	4	0	0	0	0	0	2	4	1	0	2	0
IGHV1-3	249	52	248	7	195	20	48	227	1	155	24	13	239	310	173	541	93	87	152	215	4	189	151	374	143	17	22	2	297	238	1018	361	1292	512	16	443	617	57	70	98	31	135	59	88	249	33	173	28	177
IGHVIII-2-1	0	0	0	0	0	0	0	0	0	0	0	0	6	0	0	0	0	0	0	0	0	0	0	0	0	0	0	0	0	0	0	0	0	0	0	0	0	0	0	0	0	0	0	0	0	0	0	0	0
IGHV1-2	47	309	277	1144	111	253	11	257	511	708	103	47	261	51	392	310	162	905	27	489	3823	149	442	347	287	165	27	945	815	218	851	105	107	1132	4	102	130	111	565	135	121	345	96	30	1497	19	288	132	816
RPS8P1	142	115	140	91	29	73	27	93	182	195	146	12	112	21	160	63	138	166	42	228	266	120	218	87	99	12	159	183	88	60	85	221	175	69	130	129	108	33	46	40	74	58	32	89	58	180	77	77	22
ADAM6	0	0	0	0	0	0	0	8	0	0	0	0	0	0	2	0	0	0	0	0	0	0	0	0	0	0	0	0	0	0	0	0	0	0	0	2	0	0	0	0	0	0	0	0	0	0	0	0	2
IGHVII-1-1	0	0	0	0	0	0	0	0	0	0	0	0	0	0	0	0	0	0	0	0	0	0	0	0	0	0	0	0	0	0	0	0	0	0	0	0	0	0	0	0	0	0	0	0	0	0	0	0	0
IGHV6-1	230	67	119	37	243	46	11	150	20	148	134	2	75	55	10	109	14	138	42	100	677	193	62	205	54	46	4	41	110	133	185	93	145	63	8	85	238	11	61	34	7	136	49	23	272	7	34	32	39
IGHD1-1	0	0	0	0	0	0	0	0	2	2	0	0	0	0	0	0	0	0	0	0	0	19	0	4	0	0	0	0	0	2	0	0	0	0	0	0	0	0	0	0	0	1	0	0	2	0	0	0	0
FAM30A	142	44	170	135	55	19	29	63	39	785	14	0	78	83	13	120	38	104	189	147	2694	2708	124	282	60	41	54	27	64	241	113	82	269	166	16	95	81	45	102	10	45	46	14	31	359	4	121	15	62
IGHD2-2	0	0	1	0	0	0	0	0	0	8	0	0	0	0	0	6	0	0	0	0	20	18	0	1	0	0	1	0	0	3	0	12	3	0	0	2	3	3	0	0	0	0	0	0	2	0	7	0	0
IGHD3-3	0	0	0	0	0	1	0	0	0	8	0	0	0	0	0	0	0	2	0	0	17	7	0	0	0	0	0	3	0	0	0	0	0	0	0	0	0	0	0	0	0	0	0	0	0	2	1	2	0
IGHD4-4	2	0	0	0	0	0	2	0	0	2	0	0	0	0	0	0	0	0	1	0	7	4	0	0	0	0	0	0	0	0	0	0	0	0	0	0	0	0	0	0	0	2	0	0	0	0	0	0	0
IGHD5-5	0	0	0	0	0	0	0	0	0	2	0	0	0	0	0	0	0	0	0	0	14	7	0	0	0	0	0	0	0	0	0	3	0	0	0	0	0	0	0	0	0	0	0	0	0	0	0	0	0
IGHD6-6	0	0	0	0	0	0	0	0	0	1	0	0	0	0	0	0	0	0	0	0	4	5	0	0	0	0	0	0	0	0	0	0	0	0	0	0	0	0	0	0	0	0	0	0	0	0	0	0	0
IGHD1-7	0	0	0	0	0	0	0	0	0	2	0	0	0	0	0	0	0	0	2	0	6	5	0	0	0	0	0	0	0	0	0	0	0	0	0	0	0	0	0	0	0	0	0	0	0	0	0	0	0
IGHD2-8	0	0	0	0	1	0	0	0	0	2	0	0	0	0	0	0	0	0	0	0	6	0	0	0	0	0	0	0	0	2	0	0	0	0	0	0	0	0	0	0	0	0	0	0	0	0	0	0	0
IGHD3-9	0	2	0	4	4	0	0	0	1	9	0	0	0	0	9	0	3	4	4	2	27	22	0	3	13	0	0	0	21	11	0	1	6	0	0	0	6	0	3	0	0	2	1	0	4	0	4	0	0
IGHD3-10	0	0	0	0	0	0	0	0	0	8	0	0	0	0	0	0	0	0	6	0	20	3	0	4	0	0	0	0	0	0	1	0	0	0	0	0	0	0	0	0	0	0	0	0	0	0	0	0	0
IGHD4-11	0	0	0	0	0	0	0	0	0	0	0	0	0	0	0	0	0	0	0	0	6	9	0	1	0	0	0	0	10	0	0	0	0	0	0	0	0	0	5	0	0	0	0	0	4	0	0	0	0
IGHD5-12	0	0	0	0	0	0	0	0	0	12	0	0	4	0	0	0	0	0	2	0	33	11	0	0	0	0	0	0	0	6	0	2	0	0	0	0	0	0	0	0	0	0	0	0	3	0	0	0	0
IGHD6-13	0	0	0	1	0	0	0	0	0	2	0	0	0	0	0	0	0	1	4	0	6	13	0	0	0	0	0	0	0	0	4	0	0	0	0	0	0	0	0	0	0	0	0	0	0	0	0	0	0
IGHD1-14	0	0	0	0	0	0	0	0	0	6	0	0	0	0	0	0	0	0	0	0	4	4	0	1	0	0	0	0	0	2	0	0	0	0	0	0	0	0	0	0	0	0	0	0	1	0	0	0	0
IGHD2-15	0	0	2	0	0	0	0	0	0	11	0	0	0	0	0	0	0	0	1	0	22	2	0	0	0	0	0	0	5	0	0	0	0	0	0	0	0	0	0	2	0	0	0	0	3	0	0	0	0
IGHD3-16	0	0	0	2	0	0	0	6	0	3	0	0	0	0	0	0	0	1	0	0	36	4	0	2	0	0	0	0	0	2	0	0	0	6	0	0	1	0	0	0	0	0	0	0	2	0	0	0	0
IGHD4-17	0	0	0	0	0	0	0	2	0	0	0	0	4	0	0	0	0	0	0	8	10	1	2	2	0	0	0	0	0	1	0	0	0	0	0	0	1	2	1	0	0	0	0	0	0	0	0	0	0
IGHD5-18	0	0	0	0	0	0	0	0	0	0	0	0	0	0	0	0	0	0	0	0	8	2	0	0	0	0	0	0	0	0	0	1	0	0	0	0	0	0	0	0	0	0	0	0	3	0	0	0	0
IGHD6-19	0	0	2	0	0	0	0	0	0	2	0	0	0	0	0	0	0	0	0	0	5	0	0	0	0	0	0	0	0	2	0	0	0	0	0	0	0	0	0	0	0	0	0	0	3	0	0	0	0
IGHD1-20	0	0	0	0	1	0	0	0	1	0	0	0	0	0	0	0	0	0	1	0	7	2	0	0	0	0	0	2	0	0	0	0	0	0	0	0	0	0	0	0	0	0	0	0	0	0	0	0	0
IGHD2-21	0	0	0	2	0	0	0	0	0	4	0	0	0	0	0	0	0	0	0	0	16	2	0	2	0	0	0	0	0	0	0	0	0	2	0	0	0	0	2	0	0	0	0	0	0	0	0	0	0
IGHD3-22	0	1	1	3	0	0	0	11	0	4	0	2	0	5	0	0	0	0	1	0	13	1	0	0	0	0	0	0	0	4	2	1	3	0	0	2	3	0	0	0	0	0	0	1	0	0	1	1	0
IGHD4-23	0	0	0	0	0	0	0	2	0	2	0	0	0	0	0	0	0	0	0	0	1	4	0	0	0	0	0	0	1	0	3	4	5	0	0	4	0	0	0	0	1	0	0	0	4	0	0	0	0
IGHD5-24	0	0	0	0	0	0	0	0	0	0	0	0	0	0	0	0	0	0	0	0	2	2	0	0	0	0	0	0	0	0	0	0	0	0	0	0	0	0	0	0	0	0	0	0	1	0	0	0	0
IGHD6-25	0	0	1	2	0	0	0	0	0	6	0	0	0	4	0	0	0	1	1	0	0	0	0	2	0	0	0	0	0	0	4	0	10	0	0	0	0	0	1	0	0	0	0	0	2	0	0	0	0
IGHD1-26	0	0	2	0	0	0	0	0	0	1	0	0	0	0	0	0	0	0	2	0	0	6	0	0	0	0	0	0	0	0	0	0	2	0	0	0	0	0	0	0	0	0	0	0	0	0	0	0	0
IGHJ1P	0	0	0	1	0	0	0	2	0	1	0	0	1	0	0	0	0	0	0	8	2	2	0	1	0	0	0	0	0	0	0	0	0	0	0	1	0	0	0	0	0	0	0	0	0	0	0	0	0
IGHD7-27	0	0	0	0	0	0	0	0	0	0	0	0	0	0	0	0	0	0	0	0	0	0	0	0	0	0	0	0	0	0	0	0	0	0	0	1	0	0	0	0	0	0	0	0	0	0	0	0	0
IGHJ1	1	0	0	0	0	0	0	0	0	3	0	0	0	0	0	0	0	6	0	0	2	6	0	5	0	0	0	0	0	2	0	0	0	2	0	0	0	0	0	0	0	0	0	0	0	0	0	0	0
IGHJ2	0	0	5	7	0	2	1	3	1	18	0	0	2	1	0	0	0	6	1	8	34	13	1	7	10	11	4	0	1	2	9	7	7	0	0	3	10	0	0	2	1	1	0	0	6	1	1	0	0
IGHJ2P	0	0	0	0	0	0	0	0	0	8	0	0	3	2	0	0	0	0	1	0	27	7	0	1	0	0	0	0	0	2	7	2	0	0	0	0	0	0	1	0	1	0	0	1	0	0	0	0	0
IGHJ3	2	4	0	1	1	0	0	0	0	13	4	0	4	0	0	1	0	0	4	0	41	19	1	8	0	0	0	0	10	3	22	15	0	2	1	0	2	0	1	0	3	3	0	5	0	0	2	0	0
IGHJ4	15	0	14	3	4	10	2	12	4	108	0	2	4	0	0	13	0	11	17	5	174	60	12	13	2	7	1	5	3	24	19	24	18	8	0	13	9	5	13	3	2	1	1	5	10	0	0	0	0
IGHJ5	27	0	54	18	10	0	7	29	9	117	5	2	3	16	6	11	3	11	20	49	253	263	15	41	20	14	6	1	30	37	50	72	17	10	0	14	16	5	12	5	1	5	4	21	60	0	9	5	14
IGHJ3P	10	0	14	0	2	0	4	1	0	207	0	0	16	2	0	1	0	11	46	9	237	335	6	33	0	0	3	3	0	57	22	13	14	1	0	0	7	1	6	2	2	5	5	11	29	0	3	0	0
IGHJ6	9	6	22	9	1	17	1	4	3	293	8	0	0	12	9	6	2	8	51	7	288	393	8	43	3	0	9	1	0	92	40	28	3	6	0	4	4	7	27	14	0	2	1	8	49	0	9	2	6
MIR4537	0	1	7	1	2	0	0	0	2	40	0	0	0	2	0	2	0	6	6	0	124	60	2	5	3	8	5	0	0	5	7	5	1	0	0	0	2	0	0	0	0	0	0	0	14	0	0	0	0
MIR4538	2	0	0	0	2	0	0	0	0	1	0	0	0	0	0	0	0	2	0	0	14	5	0	0	0	0	0	0	0	3	2	0	6	0	0	0	0	2	0	0	0	0	0	0	3	0	2	0	0
MIR4507	2	0	0	0	0	0	0	0	0	2	0	0	0	0	0	0	0	0	0	0	12	2	0	0	0	0	3	0	0	0	0	0	0	0	0	0	0	0	0	0	0	0	0	0	1	0	0	0	0
MIR4539	4	0	0	0	0	0	0	0	2	20	0	0	3	2	0	0	0	4	6	0	108	13	0	6	0	5	3	2	0	7	0	0	9	0	0	0	0	0	0	1	0	0	0	0	2	0	0	0	6
IGHM	8034	2740	17475	40319	18668	8825	1665	6430	7823	9930	1710	285	11672	7616	2345	15552	2124	4791	5587	6920	348290	42807	6522	20813	12467	4317	1258	13362	19687	7634	190540	42654	24382	13354	537	95764	35094	11985	29774	3372	2933	10289	8733	9443	76108	1592	5825	5671	10648
IGHD	36	20	14	78	13	56	2	125	8	18	0	0	22	4	12	13	22	17	2	600	80	38	360	193	68	18	23	2	8	0	46	108	246	13	10	57	50	0	180	67	21	25	118	25	303	9	308	45	19
ATP6V1G1P1	0	0	0	0	0	0	0	0	0	0	2	0	0	0	2	0	0	2	0	0	11	4	0	2	0	0	0	0	0	0	0	0	0	2	0	0	0	0	2	0	0	0	0	0	2	0	0	0	0
IGHG3	9949	325	4060	14805	9777	1254	242	1566	165	214	230	226	881	1518	1608	5213	4410	5234	889	1549	50326	2628	2479	2193	1259	693	152	287	1260	814	17684	14900	18336	22684	75	2119	3119	509	5453	687	290	523	1028	3050	3698	161	656	798	3070
LOC105378184	25	0	27	30	31	14	8	8	0	76	8	0	14	12	8	33	6	19	14	8	280	167	16	26	10	18	6	2	8	13	44	21	103	22	10	19	10	18	25	2	2	6	0	0	25	0	4	6	10
IGHG1	10623	3014	8110	61021	15682	4743	2830	5886	1878	1236	1264	339	6233	18633	8572	14037	17000	24830	5183	4960	53474	16369	30173	11255	9220	5138	1165	3326	3228	4662	85836	101362	66596	32757	1353	17698	14875	2824	26819	5761	1170	7820	7034	19811	33861	545	13091	3280	23738
LOC107987211	4	0	1	0	4	0	0	7	0	23	2	0	2	0	0	2	0	0	4	3	61	33	0	9	0	8	0	2	8	16	4	6	0	0	0	2	0	2	2	0	0	0	0	0	10	0	6	6	0
IGHEP1	0	0	0	0	0	0	0	10	0	5	2	0	0	0	0	0	2	0	5	0	23	19	0	0	0	4	2	0	0	12	2	0	0	0	0	0	0	0	0	0	0	0	0	0	0	0	0	0	0
IGHA1	292378	69206	222417	429681	73797	60872	59520	156346	27251	257318	63564	5757	235543	194133	83302	216519	29272	376170	50587	402531	931293	464923	118148	149094	134567	69193	16106	41836	219953	133861	495110	604919	173085	474802	5884	207482	181937	87597	113192	43946	39771	86528	37911	73034	560472	9676	94544	39265	292627
LOC105378185	0	0	0	0	0	0	0	0	0	0	0	0	0	0	0	0	0	0	0	0	0	0	0	0	0	0	0	0	0	0	0	0	0	0	0	0	0	0	0	0	0	0	0	0	0	0	0	0	0
ELK2AP	0	0	0	0	0	0	0	0	0	0	0	0	0	0	0	0	0	0	0	0	3	0	0	0	0	0	0	0	0	1	0	0	0	0	0	0	0	0	0	0	0	0	0	0	0	0	0	0	0
IGHGP	69	14	1	1278	240	69	32	214	10	71	9	21	62	640	71	238	969	270	214	82	873	76	15	346	126	33	16	2	225	55	3245	1150	942	89	21	23	96	80	1168	377	20	341	74	432	410	23	107	19	9
LOC105378187	23	1	2	13	8	14	6	15	0	78	0	0	4	0	2	8	1	11	13	12	229	130	6	14	6	2	2	0	4	19	27	3	28	10	0	33	12	2	16	0	4	0	0	2	22	9	0	0	8
LOC112268138	6	0	12	0	0	0	0	0	0	14	0	0	6	0	0	0	3	2	0	2	26	20	9	2	0	0	0	2	0	2	0	0	4	2	0	7	0	0	0	0	0	0	0	0	3	0	0	1	0
IGHG2	3272	410	1395	34311	6617	338	600	1565	93	500	198	47	2410	2115	188	3703	1599	4650	392	2375	38021	712	2421	2850	560	921	80	213	1529	559	9137	8531	14849	32567	680	7633	2641	682	7353	340	195	972	1402	1740	10689	188	283	249	2811
MIR8071-2	0	0	2	12	0	2	2	3	0	8	0	0	0	4	0	2	8	3	0	4	47	43	4	8	0	0	0	3	1	2	7	1	23	39	1	27	3	0	7	0	0	0	0	0	5	0	0	1	1
IGHG4	978	299	728	1254	836	349	45	303	194	111	103	20	517	436	248	416	1793	887	75	251	3799	741	1456	99	470	247	21	355	490	168	841	644	5514	2038	239	2319	222	298	697	73	16	354	286	65	601	7	198	258	1901
MIR8071-1	0	0	7	0	1	0	4	0	0	1	0	0	0	0	0	2	1	0	0	5	2	10	3	0	0	0	0	0	0	0	0	0	5	7	0	0	0	0	1	0	0	0	0	0	4	0	2	0	1
IGHE	0	4	6	14	15	0	8	6	8	32	8	0	9	20	0	8	6	10	6	4	42	95	43	14	43	22	0	36	18	14	8	4	11	0	4	26	0	7	17	2	4	2	4	0	17	0	49	9	0
IGHA2	77420	30705	65428	65349	10994	22160	10051	56949	8404	122363	21934	1752	79170	29539	22011	24992	4573	54692	5896	154507	80708	167907	21354	74403	27138	19361	5986	12253	97107	32151	59700	95425	43580	197340	2097	147290	103908	39223	29216	9308	6757	24221	10395	8293	131985	6140	13354	14582	116831
IGH	63	16	71	73	22	8	3	30	3	1123	8	2	43	23	24	82	2	73	287	121	3340	1956	30	284	11	3	4	17	22	535	155	139	44	75	16	31	16	19	64	10	11	17	5	71	401	5	34	17	24
LOC107987414	0	0	0	0	0	0	0	0	0	0	0	0	0	0	0	0	0	0	0	0	0	0	0	0	0	0	0	0	0	0	0	0	0	0	0	0	0	0	0	0	0	0	0	0	0	0	0	0	0
LOC105370698	0	0	0	0	0	0	2	0	0	2	0	0	0	0	0	0	0	0	0	0	0	0	1	0	0	0	0	0	8	0	0	0	0	0	0	0	0	0	0	0	0	0	0	0	2	0	0	0	0
ELK2BP	0	0	0	0	0	2	0	2	0	14	2	0	0	0	0	0	0	0	0	6	0	8	2	0	9	0	2	0	0	0	0	0	0	0	2	0	0	0	0	0	0	0	0	0	0	0	8	0	0
ATP5MC1P1	0	0	0	0	0	0	0	6	0	2	0	0	0	0	0	0	0	0	0	0	0	2	0	0	0	0	0	0	0	0	0	8	4	0	0	0	0	0	0	0	0	0	0	0	0	0	0	0	0
LOC105370697	0	0	2	0	0	0	0	0	0	2	2	0	0	0	0	0	0	6	0	6	12	18	9	0	0	0	3	0	0	8	0	0	0	0	0	0	0	0	0	0	0	6	0	0	1	0	0	0	0
TMEM179	12	0	0	0	0	0	0	3	2	0	4	0	2	6	2	2	2	12	0	2	12	7	6	2	21	16	4	6	18	6	0	9	4	2	10	8	2	2	0	0	0	2	0	0	2	4	7	2	0
C14orf180	4	0	4	4	0	18	4	10	2	22	27	0	6	6	0	0	0	2	2	0	0	4	8	2	0	18	75	10	8	454	0	2	2	15	50	18	8	12	0	2	0	0	0	0	0	0	6	16	1
CEND1P1	0	0	0	0	0	0	0	0	0	0	0	0	0	0	0	0	0	0	0	0	0	0	0	0	0	0	0	0	0	0	0	0	0	2	0	4	2	0	0	0	0	0	0	0	0	0	0	0	5
SERPINA1	239	44	604	179	68	2571	14	403	477	2622	510	2	75	160	408	214	532	851	57	732	30	164	360	179	65	28	2084	786	251	319	389	105	1680	179	979	1063	2470	70	134	34	52	32	263	52	256	168	84	1490	148
SERPINA2	0	0	0	0	0	0	11	0	0	0	0	0	0	0	0	0	0	0	0	0	0	0	0	0	0	0	0	0	0	0	0	0	0	0	0	2	0	0	0	0	0	0	0	0	0	0	0	0	0
SERPINA6	0	0	0	0	0	0	4	0	0	0	0	0	0	0	0	0	1	0	0	4	0	0	0	0	3	10	81	0	0	0	0	1	2	0	2	2	0	0	0	0	0	0	0	0	0	0	0	2	2
SERPINA10	0	0	0	0	2	0	0	0	4	1	4	0	6	0	6	0	7	0	2	4	2	0	4	0	0	16	2	3	0	0	0	0	0	4	5	4	2	0	0	0	0	0	0	0	0	0	0	8	0
PPP4R4	5	16	8	12	2	0	13	8	6	4	2	0	6	0	7	17	12	18	8	27	18	8	22	2	20	10	6	16	6	2	0	59	24	6	12	11	16	2	2	2	0	0	0	12	22	0	36	0	2
LOC105370634	0	0	0	0	0	0	0	0	0	0	0	0	0	0	0	0	1	0	0	0	0	0	0	0	0	0	0	0	0	0	0	0	0	0	0	0	0	0	0	0	0	0	0	0	0	0	0	0	0
IFI27L2	51	50	91	36	12	47	38	62	46	65	38	12	76	37	95	30	20	49	32	109	143	184	88	96	53	50	124	73	62	63	36	124	101	46	105	98	41	28	36	36	30	34	14	56	46	54	22	39	20
IFI27	447	813	1817	586	273	803	252	1680	401	849	466	115	845	300	604	860	221	623	173	1114	599	1378	1256	1471	942	651	1659	668	1693	1822	743	1055	1375	190	1201	829	500	572	644	604	391	3086	505	709	473	2353	888	536	379
IFI27L1	14	32	27	24	18	115	8	66	100	252	42	0	25	43	29	4	27	119	12	77	147	169	105	84	30	8	353	172	44	247	17	62	33	8	124	68	14	22	16	18	0	49	0	6	38	113	38	57	14
DDX24	518	186	629	268	112	385	173	373	664	1468	333	23	515	120	298	216	591	683	224	582	1341	1889	724	587	331	106	1419	1331	334	791	262	488	708	242	1024	501	338	225	147	184	223	165	42	256	363	1231	292	370	41
OTUB2	12	21	16	5	18	44	0	54	96	106	16	0	32	4	14	2	20	100	7	9	65	140	45	41	15	0	113	146	8	101	0	10	15	6	191	12	27	8	6	2	0	11	5	2	14	103	3	32	2
CCDC197	4	0	0	0	0	0	0	0	3	0	0	0	2	0	0	2	0	0	2	0	2	5	0	0	0	10	0	0	0	0	0	0	0	0	2	0	0	0	0	0	0	0	0	0	2	0	4	0	0
LOC107984663	0	0	0	0	0	0	0	0	0	0	0	0	0	0	0	0	0	0	0	0	0	0	0	0	0	0	2	2	4	2	0	2	0	0	0	0	0	0	0	0	0	0	0	0	2	0	0	0	0
MIR4506	0	0	0	0	0	0	0	0	0	4	0	0	0	0	0	0	0	0	0	0	11	11	2	0	0	0	0	0	0	0	0	1	0	0	0	0	0	0	2	0	0	0	0	0	0	0	0	0	0
ASB2	34	14	89	43	18	16	14	51	21	181	23	0	46	21	10	41	64	69	113	53	631	709	129	146	101	50	107	58	36	130	56	24	82	50	22	8	30	24	36	8	6	21	10	38	112	0	15	10	14
FAM181A	0	0	0	0	0	0	13	4	2	6	0	0	0	0	4	0	0	5	0	10	21	14	0	4	0	14	0	0	0	0	0	0	0	2	0	0	0	0	0	0	0	4	0	0	4	0	0	0	0
FAM181A-AS1	1	0	0	0	0	0	0	0	0	0	0	0	0	0	0	0	0	0	0	0	2	4	0	0	4	0	0	0	0	0	0	6	0	12	0	0	0	0	0	0	0	0	0	0	0	0	0	0	0
LOC105370631	0	0	0	0	0	0	0	0	0	0	0	0	2	0	0	0	0	0	0	0	2	2	0	0	2	8	0	0	0	0	0	0	0	0	0	2	0	0	0	0	0	0	0	0	0	0	0	0	0
PRIMA1	46	80	106	22	18	31	77	175	187	328	44	6	142	58	78	24	101	43	122	208	487	1420	289	100	277	90	172	241	71	136	23	122	95	56	80	98	33	17	16	34	83	10	10	32	65	2	161	38	4
RNU6-1258P	0	0	0	0	0	0	0	0	0	0	0	0	0	0	0	0	0	0	0	0	0	0	0	0	0	0	0	0	0	0	0	0	0	0	0	0	0	0	0	0	0	0	0	0	0	0	0	0	0
COX8C	0	0	0	0	0	0	0	0	0	0	0	0	0	0	0	0	0	0	0	0	0	0	0	0	0	0	0	8	0	0	0	0	0	0	0	0	0	0	0	0	0	0	0	0	0	0	0	0	0
UNC79	6	7	9	19	4	0	8	11	21	13	16	0	3	3	13	16	13	13	35	47	62	80	12	9	19	32	18	14	26	17	8	22	10	6	8	16	15	6	1	6	3	0	0	7	15	6	26	2	1
RPL36AP4	0	0	6	0	4	0	0	0	0	21	0	0	0	0	0	0	0	8	0	16	10	10	2	0	0	0	24	10	0	2	0	0	0	0	4	0	0	4	0	0	0	0	0	0	0	6	0	0	0
BTBD7	463	415	400	230	140	496	261	713	1061	1734	373	29	565	181	521	235	272	703	216	730	1347	1605	825	471	567	129	2235	1893	471	2097	221	754	377	272	1245	476	254	269	103	147	177	211	54	311	351	1230	450	438	69
RPL18AP1	0	0	0	0	0	8	1	0	0	10	0	0	0	0	0	0	0	2	0	0	3	6	0	0	0	0	14	2	0	12	0	0	0	11	16	0	0	0	0	0	0	0	0	0	0	8	0	0	0
UBR7	165	196	245	169	66	225	112	334	266	407	216	6	337	56	214	168	174	218	71	331	370	353	406	186	199	63	472	529	234	291	103	304	255	107	440	291	186	96	66	98	115	100	49	153	166	374	206	168	32
GON7	66	65	62	35	12	72	16	40	101	118	80	4	70	12	82	71	68	64	16	121	70	61	81	58	31	14	143	210	42	58	26	105	50	25	111	98	46	32	18	20	17	52	14	24	42	79	25	45	8
TMEM251	37	16	43	39	12	40	3	79	93	97	45	2	88	7	39	45	40	60	17	88	90	104	119	55	28	0	103	147	50	117	18	98	64	4	112	28	30	12	13	32	6	50	14	41	24	105	28	28	14
MOAP1	81	48	107	48	28	99	41	118	117	212	123	8	186	20	67	41	89	106	40	158	266	235	179	109	112	8	229	172	128	134	52	217	136	49	303	120	81	27	50	45	66	51	10	93	65	192	79	91	18
CYB5AP3	0	0	0	0	0	0	2	0	0	0	0	0	0	0	0	0	0	2	0	0	0	0	0	0	0	0	0	0	0	0	0	0	0	0	4	0	0	0	0	0	0	0	0	0	0	0	0	0	0
ITPK1-AS1	4	8	4	0	0	52	2	41	410	446	10	0	4	22	4	0	40	174	8	0	72	154	70	67	9	5	1198	725	6	326	0	0	8	0	127	4	4	14	0	6	0	0	0	0	12	391	0	28	0
ITPK1	667	265	591	251	108	1839	287	1240	3579	3398	1306	37	931	343	492	346	1087	3016	163	719	633	1706	1009	1206	674	286	9445	6411	583	2715	263	704	644	232	1437	1000	759	629	126	166	276	219	97	177	324	3418	489	1460	81
CHGA	854	80	96	33	36	118	49	122	209	128	38	20	32	20	137	63	1006	108	358	316	310	426	198	56	97	23	248	320	267	115	23	120	347	31	176	88	292	0	10	49	30	85	69	48	317	302	217	106	16
LINC02287	0	0	0	0	0	0	0	0	0	0	0	0	2	0	0	0	2	0	0	0	0	0	2	4	4	0	19	2	0	0	0	0	2	0	0	0	0	0	0	0	0	0	0	0	0	4	4	0	0
LINC02833	0	0	0	0	0	0	2	0	0	3	0	0	0	0	0	0	0	0	2	1	1	0	0	0	0	0	8	0	0	0	0	0	2	0	0	4	0	0	0	0	0	0	0	0	2	1	0	0	0
TC2N	519	460	330	335	122	705	134	676	3675	3413	700	16	849	203	573	308	833	2520	91	763	675	433	633	432	366	59	6181	6535	568	5595	243	834	617	175	2729	1488	473	431	81	123	173	215	129	317	415	2345	551	598	131
LOC100128939	0	0	0	0	0	12	0	2	97	105	2	0	0	0	0	0	20	68	0	0	0	0	0	0	0	0	180	215	0	134	0	4	0	0	88	0	0	2	0	2	0	0	0	0	0	51	0	0	0
NANOGP7	2	14	0	0	0	2	0	8	92	123	2	0	0	0	0	0	4	64	0	0	4	1	8	6	2	0	153	129	0	79	0	0	0	0	30	0	2	18	0	0	0	0	0	0	4	46	0	10	0
POLR3GP1	0	2	0	4	0	16	2	0	63	129	7	0	0	0	0	0	10	49	0	4	12	2	2	0	0	6	97	64	0	77	0	4	0	2	67	10	26	6	2	3	2	1	0	8	0	59	6	10	6
CATSPERB	49	14	53	12	2	67	14	42	790	1074	18	6	38	10	4	21	76	587	6	73	22	12	26	12	14	64	1232	1521	14	1556	16	6	65	6	515	127	76	60	10	6	13	8	21	10	28	446	10	83	0
LOC101928957	2	2	2	0	0	4	0	2	159	248	3	0	8	0	0	0	14	188	0	4	4	0	8	8	0	8	296	233	0	182	0	0	2	8	123	12	6	17	0	2	0	0	0	0	0	152	4	8	2
LINC00552	0	2	0	0	0	0	0	0	10	0	2	0	0	0	8	8	4	0	0	0	0	4	0	0	0	0	4	0	12	0	0	0	0	0	16	0	0	0	0	0	0	0	0	0	0	0	0	0	0
LOC105377805	10	10	0	0	2	0	1	4	10	6	4	0	0	0	2	0	4	2	2	16	4	16	14	2	6	10	11	0	0	0	0	12	6	0	14	4	0	0	0	2	0	2	0	0	1	0	2	0	4
GRK1	0	0	0	0	0	0	2	4	11	10	2	0	0	0	2	3	0	4	0	12	16	8	20	0	0	18	11	1	8	8	0	2	0	2	16	6	4	4	0	0	0	0	0	6	2	11	6	0	6
TUBGCP3	236	120	160	103	49	175	55	214	363	663	164	8	176	41	138	118	232	225	112	216	671	886	435	192	168	114	851	692	140	674	83	278	144	93	602	202	95	82	62	72	38	78	16	111	133	489	133	214	16
LOC105370372	0	0	0	0	0	0	4	0	0	0	2	0	1	0	0	0	0	0	0	1	0	2	0	0	0	7	0	0	0	0	0	0	0	2	0	0	0	0	0	0	0	0	0	0	0	0	0	0	0
SPACA7	2	0	0	0	0	0	0	0	0	0	0	0	0	0	0	0	0	0	0	0	0	4	2	0	2	1	2	0	0	0	0	0	0	0	0	0	0	0	0	0	0	0	0	0	0	0	0	0	2
LOC105370373	0	0	0	2	0	0	0	4	0	0	0	0	2	0	0	0	0	0	0	0	17	4	0	0	4	7	1	0	9	0	0	2	0	0	0	0	0	0	0	0	0	0	0	0	0	0	2	0	0
LINC01044	2	0	0	0	0	0	0	2	0	0	2	0	0	0	0	0	2	0	0	0	0	0	0	0	0	0	0	0	0	0	0	0	0	0	0	0	0	0	0	0	0	0	0	0	0	0	0	0	1
LINC01043	0	0	0	0	0	0	0	3	0	0	0	0	0	0	0	0	0	0	0	4	2	0	2	0	4	15	7	0	4	0	0	0	1	4	0	0	0	0	0	0	0	0	0	0	0	0	8	0	0
LOC107984555	2	0	0	0	0	0	0	0	0	0	1	0	0	0	0	0	0	0	0	0	4	0	0	0	0	5	0	2	0	0	0	6	0	0	0	0	0	0	0	0	0	0	0	0	0	0	0	0	0
LOC101928730	0	2	0	0	0	0	1	0	0	0	2	0	0	0	0	0	0	0	0	0	3	0	0	0	0	0	0	0	0	0	0	0	0	0	0	0	0	0	0	0	0	0	0	0	0	0	0	0	4
LINC01070	0	0	0	0	0	0	0	0	2	0	2	0	0	0	0	2	0	0	0	4	0	0	0	0	0	10	0	1	0	0	0	0	0	0	0	0	0	0	0	0	0	0	0	0	0	0	1	0	0
LOC105370370	4	0	0	1	2	0	0	0	0	4	0	0	0	0	2	0	0	0	0	2	4	2	0	0	2	11	0	2	3	2	0	0	1	7	2	13	0	0	0	0	0	0	0	0	4	0	0	0	0
ATP8A2	0	16	20	4	4	8	23	23	7	68	26	2	22	5	48	10	19	12	36	30	133	343	105	18	4	64	39	21	30	143	6	28	27	12	108	44	5	7	4	4	6	12	2	18	16	0	26	2	4
RNU6-76P	0	0	0	0	0	0	0	2	0	0	0	0	0	0	0	0	0	0	0	0	0	0	0	0	0	0	0	0	0	0	0	0	0	0	0	0	0	0	0	0	0	0	0	0	0	0	0	0	0
RNU6-55P	0	0	0	0	0	0	0	0	0	0	0	0	0	0	0	0	0	0	0	0	0	0	0	0	0	0	0	0	0	0	0	0	0	0	0	0	0	0	0	0	0	0	0	0	0	0	0	0	0
RHOT1P3	25	36	23	17	10	97	22	24	49	59	22	2	27	8	14	13	17	16	20	58	52	75	60	18	66	10	63	120	33	42	9	34	35	14	70	43	37	5	2	2	5	16	6	16	41	36	34	40	4
ANKRD20A9P	4	2	0	0	2	0	0	4	12	2	0	0	0	1	0	2	0	0	2	3	1	5	5	4	0	14	3	1	0	2	0	0	0	0	2	2	0	0	0	0	0	0	0	2	2	0	9	0	2
LINC00328-2P	0	0	0	0	0	0	1	0	0	0	0	0	0	0	0	0	0	0	0	0	0	0	0	0	0	0	0	0	0	0	0	0	0	0	0	2	0	0	0	0	0	0	0	0	0	0	0	0	0
SNX18P26	0	0	0	2	0	0	0	2	2	0	2	0	0	0	0	0	0	0	0	0	2	0	0	0	2	0	1	0	0	0	0	10	0	0	0	0	0	0	0	0	0	0	0	0	2	0	0	0	0
CYP4F34P	0	0	0	0	0	0	0	0	0	0	0	0	0	0	0	0	0	0	0	0	0	0	0	0	0	0	0	0	0	0	0	0	0	0	0	0	0	0	0	0	0	0	0	0	0	0	0	0	0
LINC00417	0	0	0	0	0	0	2	2	4	0	0	0	0	0	0	0	0	0	0	0	2	2	0	0	0	0	0	0	0	2	0	0	0	0	0	0	0	0	0	0	0	0	0	0	0	0	0	0	0
ZNF965P	0	0	0	0	0	0	0	0	0	0	0	0	0	0	0	2	0	0	0	2	0	0	0	0	0	0	0	0	0	0	0	0	0	0	0	0	0	0	0	0	0	0	0	0	0	0	0	0	0
CNN2P12	0	0	0	0	0	0	0	0	0	0	4	0	0	0	0	0	0	0	0	0	0	0	0	0	3	0	0	0	0	4	0	1	0	0	0	4	0	0	0	0	0	0	0	0	0	0	6	0	0
GXYLT1P1	0	0	0	0	0	0	0	0	2	0	0	0	0	0	0	0	2	0	0	0	0	0	0	0	0	0	0	0	0	1	0	0	0	0	0	0	0	0	0	0	0	0	0	0	2	0	0	0	0
BCYRN1P3	0	0	0	0	0	0	0	0	0	0	0	0	1	0	0	0	0	0	0	0	0	0	0	0	0	0	0	0	0	0	0	0	0	0	0	0	0	0	0	0	0	0	0	0	0	0	0	0	0
PIWIL1	49	0	6	2	0	22	4	8	36	5	2	0	2	15	0	79	16	32	0	4	2	0	8	2	2	0	67	19	0	22	0	0	2	6	1596	15	2	4	0	0	2	12	0	0	0	26	4	12	2
LOC101927786	0	0	0	0	0	4	0	0	0	4	2	0	0	0	0	0	2	0	0	0	0	0	2	0	15	2	6	0	0	0	0	0	0	0	0	6	0	0	0	0	0	0	0	0	0	2	0	0	2
LINC02825	0	0	0	1	0	0	6	0	0	0	0	0	0	0	0	0	2	0	0	0	0	0	0	0	0	0	2	0	0	0	0	0	0	0	5	0	0	0	0	0	0	0	0	0	0	0	0	0	0
LOC107984448	0	0	0	2	0	0	2	0	0	0	0	0	0	0	0	0	0	0	0	0	0	0	0	0	0	3	0	0	0	0	0	4	0	0	45	0	0	0	0	0	0	0	0	0	0	0	2	4	0
LOC101927531	0	4	0	0	0	0	2	0	0	0	0	0	0	0	0	0	0	0	0	0	2	4	10	0	2	2	0	0	0	0	0	0	0	0	109	0	0	0	0	0	0	0	0	0	0	2	0	0	0
LOC105379613	4	0	0	0	2	0	0	0	0	0	0	0	0	0	2	0	0	0	0	0	4	0	0	0	3	0	0	0	2	0	0	0	0	0	48	0	0	0	2	0	0	0	0	0	0	0	4	0	0
CCDC92	272	210	247	118	30	300	102	240	388	535	142	14	335	65	224	112	231	262	106	529	451	1154	551	234	293	83	557	603	208	460	59	257	313	103	563	182	159	75	40	88	50	78	34	65	265	181	146	119	18
DNAH10	26	16	19	6	6	8	17	24	19	41	10	2	6	2	12	10	8	10	7	30	65	80	56	28	44	29	48	29	12	46	4	16	8	9	68	25	6	0	2	2	0	2	0	14	24	9	20	15	4
ANO4	1	1	6	0	4	26	5	6	8	22	16	0	4	14	1	4	7	16	2	19	31	2	15	10	8	9	12	33	4	22	1	23	8	4	10	2	2	2	0	0	0	6	0	4	2	10	15	18	0
RNU6-768P	0	0	0	0	0	0	0	0	0	0	0	0	0	0	0	0	0	0	0	0	0	0	0	0	0	0	0	0	0	0	0	0	0	0	0	0	0	0	0	0	0	0	0	0	0	0	0	0	0
SLC5A8	0	0	0	0	0	0	6	0	6	0	4	0	1	0	12	0	6	0	1	2	0	0	3	0	2	20	0	0	0	0	0	0	0	0	0	0	0	0	0	0	0	0	0	0	0	1	0	0	0
RPS6P19	0	0	0	0	0	0	0	0	0	0	0	0	0	0	0	0	2	0	0	0	2	0	0	0	2	0	0	0	0	0	0	0	0	0	0	0	0	0	0	0	0	0	0	0	2	0	0	0	0
METTL15P2	0	0	0	0	0	0	0	2	0	0	2	0	0	0	0	0	0	0	0	0	8	0	0	0	0	0	1	0	0	0	0	0	0	0	11	0	0	0	0	0	0	0	0	0	0	2	0	0	0
RPS6P22	2	0	0	0	0	0	0	0	0	6	0	0	0	0	0	0	0	2	0	1	7	0	0	0	0	0	8	2	0	6	0	0	0	0	20	0	0	2	0	0	0	0	0	0	0	0	0	0	0
LOC107987421	0	0	0	0	0	0	0	0	0	0	0	0	0	0	0	0	0	0	0	0	0	0	0	0	0	0	0	0	0	0	0	0	0	0	0	0	0	0	0	0	0	0	0	0	0	0	0	0	0
GIHCG	4	4	20	18	6	4	12	8	2	8	4	0	9	0	2	8	4	2	9	8	35	23	22	12	10	0	2	2	5	16	2	10	3	0	16	28	10	4	2	0	4	4	0	8	6	4	8	2	0
ATP23	27	13	17	6	6	36	10	76	18	34	31	2	34	7	24	27	24	14	8	46	84	73	16	16	34	0	76	49	20	63	12	71	30	42	69	10	22	16	4	8	9	12	2	2	24	60	20	21	4
LOC100533641	4	0	0	0	2	4	0	2	2	6	0	0	0	0	0	0	0	0	0	0	0	0	0	0	0	0	2	2	0	2	0	8	2	0	0	0	0	0	0	0	0	0	0	0	0	0	0	0	0
RN7SKP65	0	0	0	0	0	0	0	4	0	0	0	0	0	0	0	0	0	0	0	0	0	0	0	0	0	0	0	0	0	0	0	0	0	0	0	0	0	0	0	0	0	0	0	0	0	0	0	0	0
ST13P8	0	0	0	0	0	0	0	0	0	0	0	0	0	0	0	0	0	0	0	0	0	0	0	0	0	0	0	0	2	0	0	0	0	0	0	0	0	0	0	0	0	0	0	0	0	2	0	0	0
LINC02403	0	0	0	0	0	0	0	0	0	0	0	0	0	0	0	0	0	0	0	0	0	0	0	0	0	0	0	0	0	0	0	0	0	0	0	0	0	0	0	0	0	0	0	0	2	0	0	0	0
LOC105369784	4	0	0	0	0	0	0	0	0	0	0	0	0	0	0	0	0	0	0	0	0	0	0	0	0	9	0	0	0	0	0	0	0	0	0	0	0	0	0	0	0	0	0	0	0	0	0	0	0
FLJ13224	6	0	0	0	0	3	0	6	26	51	4	0	6	6	0	0	8	18	6	0	24	43	25	10	0	0	57	36	0	36	0	4	10	0	33	9	0	2	0	4	0	0	0	2	2	69	4	4	0
SINHCAF	548	160	162	140	71	270	71	218	468	680	351	2	237	93	215	146	349	406	74	298	506	331	282	198	161	14	948	848	236	655	158	403	335	106	515	261	197	121	62	77	56	77	18	115	167	771	231	250	41
LOC100419525	0	0	0	0	0	2	0	0	5	1	0	0	0	2	0	0	2	0	0	0	0	0	0	2	0	0	2	4	0	4	0	1	0	0	0	0	0	0	0	0	0	2	0	0	2	4	0	0	0
MREGP1	0	0	0	0	0	0	0	0	0	0	0	0	0	0	0	0	2	0	0	0	0	0	0	0	0	0	0	0	0	0	0	0	0	0	0	0	0	0	0	0	0	0	0	0	0	0	0	0	0
RPL13AP22	5	4	8	0	0	45	2	9	4	8	5	0	10	0	7	11	8	7	0	11	27	6	7	3	7	9	11	11	14	3	3	16	12	10	13	8	19	2	0	5	2	2	0	1	8	5	7	24	0
MTCYBP26	0	0	0	0	0	0	0	0	0	0	0	0	0	0	0	0	0	2	0	0	4	0	0	0	0	0	0	0	0	0	0	0	2	2	0	0	0	0	0	0	0	0	0	2	0	2	4	0	0
MTND6P26	0	0	0	0	0	0	0	2	0	0	0	0	0	0	0	0	0	0	0	0	0	0	0	0	0	0	0	0	0	0	0	0	0	0	0	0	0	0	0	0	0	0	0	0	0	0	0	0	0
MTND5P43	0	0	0	0	0	0	0	0	0	2	0	0	0	0	2	0	0	0	0	0	0	0	0	0	0	0	0	0	0	0	0	3	0	0	0	0	0	2	0	0	0	0	0	0	0	1	4	0	0
LOC107987168	6	0	0	0	0	0	3	0	0	0	0	0	0	0	0	0	0	0	0	0	0	0	0	0	0	6	2	0	0	2	0	0	0	0	0	0	2	1	0	0	0	0	0	0	0	0	0	0	0
LOC101060058	0	0	0	0	0	0	0	0	2	0	0	0	0	0	1	0	0	1	0	0	0	4	2	0	0	0	2	0	0	0	0	0	0	0	0	2	0	0	0	0	0	0	0	0	0	0	0	0	0
OVOS2	10	9	6	8	0	28	12	19	81	121	5	0	11	9	6	2	5	27	11	22	41	301	13	65	6	11	132	143	0	107	13	20	7	8	10	12	1	5	4	2	3	0	0	0	23	26	5	30	0
PRB2	6	0	0	0	0	0	0	13	21	2	2	0	0	0	0	0	2	6	0	3	28	6	11	0	0	0	0	28	0	2	0	0	2	2	5	0	0	0	0	0	0	0	0	0	10	0	0	0	0
TAS2R18P	18	0	2	0	2	3	0	13	61	78	0	0	5	0	0	0	8	19	4	0	94	69	35	16	10	0	56	127	0	85	0	1	2	0	35	0	0	2	0	0	0	6	0	0	16	46	0	6	0
TAS2R43	0	0	0	0	2	0	0	1	0	53	0	0	6	4	0	0	0	2	4	1	29	96	16	2	8	4	48	2	0	40	4	0	0	0	17	0	1	2	0	0	0	0	0	2	1	23	0	4	4
TAS2R64P	2	0	0	0	0	0	0	1	3	31	0	0	0	2	2	2	8	4	0	0	32	46	7	4	0	0	42	3	0	29	0	0	0	0	20	5	0	0	0	0	0	0	0	0	0	15	0	3	0
LOC574538	0	1	0	0	0	0	0	0	4	3	0	0	0	0	2	0	0	0	2	3	6	2	0	2	0	0	0	0	10	3	0	2	0	0	0	1	2	0	0	0	0	0	0	0	2	4	0	4	0
LOC105369593	0	2	0	2	0	0	0	0	0	2	0	0	0	0	0	0	2	2	0	0	0	0	0	0	0	0	0	0	0	0	0	0	0	0	0	0	0	0	0	0	0	0	0	0	0	2	0	4	0
IQSEC3	42	2	23	17	8	29	30	24	98	96	17	6	64	18	42	6	8	20	16	122	98	218	134	32	37	51	49	81	54	55	3	48	83	7	38	43	20	12	7	8	10	24	0	5	47	4	32	11	2
FAM138D	0	0	0	0	0	0	0	0	0	0	0	0	0	0	0	0	0	0	0	0	0	0	0	0	0	0	0	0	0	0	0	0	0	0	0	0	0	0	0	0	0	0	0	0	0	0	1	1	0
LOC107987170	0	0	0	0	0	0	0	0	0	0	0	0	0	0	0	0	0	0	0	0	0	0	0	0	0	0	0	0	0	4	0	0	0	0	0	0	0	0	0	0	0	0	0	0	0	0	0	0	0
WASH8P	151	96	90	64	18	343	83	210	318	573	52	6	88	88	115	45	74	130	23	217	154	758	306	140	185	243	1309	471	103	583	13	53	112	57	569	26	19	96	14	43	3	66	11	14	111	481	171	207	6
DDX11L8	0	0	0	0	0	4	8	2	3	14	0	0	2	2	0	0	0	5	4	16	4	46	8	2	2	14	21	14	0	6	0	0	0	0	2	0	0	0	0	0	0	0	0	0	4	9	0	0	0
LINC02697	0	0	0	2	0	0	0	0	2	0	2	0	0	0	0	0	0	0	0	2	0	0	0	0	4	0	0	0	0	2	0	0	1	0	0	0	0	0	0	0	0	0	0	0	0	0	0	0	0
LOC338694	0	0	0	0	0	0	0	0	0	4	0	0	0	0	1	0	2	0	4	0	2	3	0	0	0	0	2	0	0	0	1	2	0	0	1	0	0	0	0	2	0	0	0	0	4	0	0	0	0
LOC105369366	0	0	0	0	0	0	0	0	0	0	0	0	0	0	0	0	0	0	0	0	2	2	0	2	0	0	0	0	0	0	0	0	0	0	0	0	0	0	0	0	0	0	0	0	0	0	0	0	0
LOC107987426	0	0	0	0	0	0	0	0	0	0	0	0	0	0	0	0	0	0	0	0	0	0	0	0	0	0	0	0	0	0	0	0	0	0	0	0	0	0	0	0	0	0	0	0	0	0	0	0	0
OR5G3	0	0	0	0	0	0	2	0	0	0	0	0	0	0	0	0	0	0	0	0	2	0	0	0	0	0	0	2	0	0	0	0	0	0	0	0	0	0	0	0	0	0	0	0	1	4	0	0	0
OR5G5P	0	0	0	0	0	0	0	0	0	0	2	0	0	0	0	0	2	0	0	0	4	0	0	0	0	0	0	0	0	0	0	0	0	0	0	0	0	0	0	0	0	0	0	0	0	0	2	0	0
OR5G4P	0	0	0	0	0	0	0	0	0	0	0	0	0	0	0	0	0	0	0	2	0	0	0	0	0	0	0	0	0	0	0	0	0	2	0	0	1	0	0	0	0	0	0	0	0	0	0	0	0
OR5G1P	2	0	0	0	0	0	0	0	0	0	0	0	2	0	0	0	0	0	0	2	0	0	0	0	2	0	0	0	0	0	0	0	0	0	0	0	0	0	0	0	0	0	0	0	0	0	0	0	0
OR9G2P	0	0	0	0	0	0	0	0	0	0	0	0	0	0	0	0	0	0	0	0	0	0	0	0	0	0	0	0	0	0	0	0	0	0	0	0	0	0	0	0	0	0	0	0	0	0	0	0	0
MIR6128	0	0	0	0	0	0	0	0	0	0	0	0	0	0	0	0	0	0	0	0	0	0	0	0	0	0	0	0	0	0	0	0	0	0	0	0	0	0	0	0	0	0	0	0	0	0	0	0	0
OR9G4	0	0	0	0	0	0	0	0	0	0	2	0	0	0	0	0	0	0	0	0	0	0	0	0	2	0	0	0	0	0	0	0	0	0	0	2	0	0	0	0	0	0	0	0	0	1	0	0	0
OR9G3P	0	0	0	0	0	0	2	0	0	0	0	0	0	0	0	0	0	0	0	0	4	0	0	0	0	0	0	0	2	0	0	0	0	0	0	0	2	0	0	0	0	0	0	0	0	0	0	0	0
OR9G9	0	0	0	0	0	0	0	0	0	0	0	0	0	0	0	0	0	0	0	0	0	0	0	0	0	0	0	0	0	0	0	0	0	0	0	0	0	0	0	0	0	0	0	0	0	0	0	0	0
OR9G1	4	0	0	0	0	0	0	0	0	0	0	0	0	0	0	0	0	2	0	4	5	0	0	0	0	4	0	0	0	0	0	0	0	0	0	4	0	0	0	0	0	0	0	0	0	2	0	0	0
OR8U9	0	0	0	0	0	0	0	0	0	0	0	0	0	0	0	0	0	0	0	0	0	0	0	0	0	0	0	0	0	0	0	0	0	0	0	0	0	0	0	0	0	0	0	0	0	0	0	0	0
OR8U8	0	0	0	0	0	0	0	0	0	0	0	0	0	0	0	0	0	0	0	0	0	0	0	0	0	0	0	0	0	0	0	0	0	0	0	0	0	0	0	0	0	0	0	0	0	0	0	0	0
RPL5P29	0	1	3	0	1	0	0	1	1	5	1	0	6	1	1	2	3	4	3	5	4	4	5	6	0	0	5	1	4	1	4	1	4	1	0	2	3	0	0	0	0	2	0	2	3	3	1	1	0
OR8J1	0	0	0	0	0	0	0	2	0	0	0	0	0	0	2	0	2	0	0	0	4	4	0	0	0	0	0	0	0	0	0	0	0	0	0	6	0	0	0	0	0	0	0	0	0	0	0	0	0
OR8K1	0	0	0	0	0	0	0	0	0	0	0	0	0	0	0	0	0	1	0	0	0	0	0	0	0	0	0	0	0	0	0	0	0	0	0	0	0	0	0	0	0	0	0	0	0	0	0	0	0
OR8K2P	0	4	0	2	0	0	0	0	0	0	2	0	0	0	0	0	0	0	0	0	0	0	0	0	0	0	0	0	0	0	0	0	0	0	0	0	0	0	0	0	0	0	0	0	0	0	0	0	0
FAM8A2P	0	6	2	0	0	0	0	2	2	0	0	0	0	0	0	0	0	0	0	4	2	0	0	0	0	3	0	0	0	0	0	0	0	12	0	4	2	0	0	0	0	0	0	0	0	0	0	6	0
OR8K3	0	0	0	0	0	0	0	0	2	0	0	0	0	0	0	0	0	0	0	2	0	0	0	0	0	0	0	0	0	0	0	0	0	2	0	12	0	0	0	0	0	0	0	0	0	0	0	0	0
OR8I1P	0	0	0	0	0	0	0	0	0	0	0	0	0	0	0	0	0	0	0	0	0	0	0	0	0	0	0	0	0	0	0	0	0	0	0	0	0	0	0	0	0	0	0	0	0	0	0	0	0
OR8H1	0	4	0	0	1	0	2	0	0	0	0	0	0	0	0	0	0	0	0	0	2	0	0	0	2	18	0	0	0	0	0	0	0	0	0	6	0	0	0	0	0	0	0	0	0	0	0	0	0
OR5T1	0	0	0	0	0	0	0	1	2	0	0	0	0	0	0	0	0	0	0	0	0	0	0	0	0	0	0	0	0	0	0	0	0	2	0	0	0	0	0	0	0	0	0	0	0	2	0	0	0
OR5T3	0	0	0	0	0	0	0	0	0	0	0	0	0	0	0	6	0	0	0	0	0	0	0	0	0	0	0	0	0	0	0	0	0	0	0	0	0	0	0	0	0	0	0	0	0	0	0	0	0
OR5T2	0	0	0	0	0	0	0	0	0	0	0	0	0	0	0	0	0	0	0	0	0	0	0	0	0	0	0	0	0	0	0	0	0	0	2	0	0	0	0	0	0	0	0	0	2	0	0	0	0
OR8J2	0	2	0	0	0	0	2	0	0	0	0	0	0	0	0	0	0	0	0	0	2	0	0	0	0	0	0	0	0	0	0	0	0	0	0	0	0	0	0	0	0	0	0	0	0	0	4	0	0
NAA50P1	0	0	0	0	0	0	2	0	0	0	0	0	0	0	0	0	1	0	0	0	2	2	0	0	0	0	0	0	0	0	0	10	2	0	0	0	0	0	0	0	0	0	0	0	0	0	0	0	0
NLRP10	0	0	0	0	0	6	0	0	0	0	0	0	0	0	0	0	0	0	0	0	0	0	2	0	0	0	0	13	6	0	0	0	0	0	2	0	0	0	0	6	0	0	0	0	0	0	0	0	0
OR10A3	0	0	2	0	0	0	2	0	0	0	4	1	0	0	0	0	0	2	0	0	0	0	0	0	0	0	0	0	0	0	0	2	0	2	0	0	0	0	0	0	0	0	0	0	0	0	0	0	0
OR10A6	0	0	0	0	0	0	6	0	0	0	2	0	0	0	0	0	0	0	0	18	6	0	0	0	0	2	2	0	0	0	0	0	4	0	2	0	0	0	2	0	0	0	0	0	0	0	4	0	0
LOC107984307	0	0	0	0	0	0	0	0	2	0	0	0	0	0	0	1	0	0	0	0	2	2	0	0	0	0	0	0	0	2	2	0	0	0	0	0	0	0	0	0	0	0	0	0	2	0	2	0	0
RNU6-943P	0	0	0	0	0	0	0	0	0	0	0	0	0	0	0	0	0	0	0	0	0	0	0	0	0	2	0	0	0	0	0	0	0	0	0	0	0	0	0	0	0	0	0	0	0	0	0	0	0
LOC283299	0	0	0	0	0	0	0	0	0	0	0	0	0	0	7	0	2	0	0	2	4	0	0	0	0	0	2	2	1	0	0	11	0	0	0	2	0	0	0	0	0	0	0	2	0	2	0	6	0
OR5E1P	0	0	0	0	0	0	0	0	0	0	0	0	0	0	0	0	4	0	0	0	0	0	0	0	0	0	0	0	0	0	0	0	0	0	0	0	0	0	0	0	0	0	0	0	0	0	0	0	0
OR5P3	0	0	0	0	0	0	0	0	0	0	0	0	0	0	0	0	0	2	0	0	0	0	0	0	0	0	0	0	0	0	0	2	0	0	0	0	0	0	0	0	0	0	0	0	0	0	0	0	0
OR5P2	0	0	0	0	0	0	0	2	0	0	0	0	2	0	0	0	0	0	0	0	0	0	0	0	0	0	0	0	2	0	0	0	0	0	0	0	2	0	0	0	0	0	0	0	0	0	0	0	0
RPL7AP55	0	0	0	0	0	0	0	0	0	0	0	0	0	0	0	0	0	0	0	0	2	0	0	0	0	0	0	0	0	0	0	0	0	1	0	0	0	0	0	0	0	0	0	0	0	0	0	0	0
RNU1-91P	5	0	2	0	0	2	4	2	8	8	0	0	0	0	0	4	3	5	0	0	3	14	11	2	0	0	16	27	0	23	0	0	0	0	6	0	0	0	0	0	0	0	0	0	0	22	2	1	0
CARS1-AS1	6	1	4	0	0	12	10	8	26	59	0	0	0	10	0	4	5	13	3	0	16	72	28	4	0	0	56	72	0	71	0	0	0	0	28	0	2	8	0	0	0	0	0	0	4	34	0	6	0
CARS1	229	92	175	70	48	339	28	306	898	925	163	12	225	63	94	92	266	525	64	179	586	840	325	224	159	99	1834	1492	170	908	63	154	190	82	583	229	166	128	41	50	61	102	36	58	107	774	103	203	55
SNORA54	2	6	24	2	0	18	6	0	32	34	6	4	2	2	4	0	26	39	12	0	86	85	36	12	100	46	76	42	0	65	8	6	56	2	52	6	12	14	0	20	0	8	0	0	8	37	10	12	0
NAP1L4	434	363	473	354	137	539	211	692	1292	1523	444	24	540	151	528	429	483	861	254	752	1572	1410	864	555	394	114	2316	2162	441	1287	316	693	614	259	1287	545	427	286	172	160	235	208	79	239	349	1350	485	462	102
PHLDA2	237	37	38	32	10	359	52	583	2672	1403	881	36	342	67	185	42	274	1982	4	196	51	703	183	101	692	54	8411	3546	410	293	32	120	157	84	302	775	324	88	12	134	64	44	12	14	144	628	66	279	14
SLC22A18	26	25	28	13	2	434	6	270	1101	1081	142	10	53	94	48	17	96	1244	9	40	58	364	85	280	47	65	3709	2134	142	1495	20	8	58	10	793	50	62	159	16	18	17	12	32	3	15	1215	18	334	12
SLC22A18AS	13	8	18	6	0	45	4	52	110	134	27	0	10	12	21	23	17	136	5	26	6	36	12	43	5	0	320	197	32	145	5	6	5	0	88	59	18	33	14	3	20	19	10	0	4	189	7	33	2
LOC107987413	0	0	0	0	0	0	0	0	0	0	0	0	0	0	0	0	0	0	0	0	0	0	0	0	0	0	0	0	0	0	0	0	0	0	0	0	0	0	0	0	0	0	0	0	0	0	0	0	0
CDKN1C	80	91	104	42	14	65	58	153	110	123	147	9	170	14	82	59	95	39	92	123	199	573	352	120	199	139	216	223	63	90	14	157	113	32	78	64	61	58	8	57	34	14	6	35	41	104	163	51	2
KCNQ1DN	0	0	0	0	0	0	6	0	0	0	0	0	0	0	0	0	0	0	0	0	0	0	0	0	0	0	0	0	0	0	0	1	0	0	0	0	0	0	0	0	0	0	0	0	0	0	0	0	4
KCNQ1-AS1	0	0	0	0	0	4	0	0	2	0	0	0	0	0	0	0	2	2	0	0	0	3	0	0	0	4	4	4	0	0	0	0	2	0	8	0	0	0	0	0	0	0	0	0	0	1	0	0	0
LOC107987412	0	0	0	0	0	0	0	0	0	0	0	0	0	0	0	0	0	0	0	0	0	0	0	0	0	0	0	0	0	0	0	0	0	0	0	0	0	0	0	0	0	0	0	0	0	0	0	0	0
COX6CP18	0	0	0	0	0	0	0	0	2	0	0	0	0	0	0	0	0	2	0	0	2	2	0	0	0	6	0	3	0	2	0	0	0	0	14	0	0	0	0	0	0	0	0	0	0	4	0	0	0
KCNQ1	72	32	89	68	37	124	86	143	386	307	159	18	70	37	121	49	119	448	106	169	209	250	304	81	205	212	1076	718	90	114	45	149	172	113	1182	108	99	47	25	30	46	50	10	28	85	603	169	213	14
DEAF1	177	63	138	64	39	280	135	219	409	517	214	15	214	54	127	76	99	290	92	258	407	683	524	146	173	299	932	756	122	640	60	253	170	104	710	100	151	124	48	45	46	93	16	61	96	442	184	205	10
DRD4	14	0	4	2	2	31	5	19	28	51	9	2	13	7	0	0	6	19	6	4	19	155	25	8	14	26	141	84	13	39	4	0	6	0	110	0	4	5	0	0	0	8	0	0	2	33	0	20	0
SCT	21	1	8	0	0	12	5	20	28	33	7	0	13	6	12	0	5	9	4	0	24	116	28	2	18	6	67	29	2	12	4	36	2	0	101	0	0	6	4	0	10	0	4	0	7	43	14	11	0
CDHR5	278	66	562	26	26	11732	64	5606	9215	13958	893	16	127	2346	66	45	340	7823	64	113	181	812	103	3314	318	83	40893	16306	462	11055	28	43	236	21	4213	493	194	2627	34	75	20	38	24	38	57	4525	100	5511	28
IRF7	134	44	91	77	14	188	30	172	704	704	109	2	92	55	71	44	111	359	67	94	473	886	269	107	98	62	2250	1215	92	705	105	53	144	111	640	114	111	91	52	9	42	62	16	16	87	398	34	116	12
PHRF1	484	234	337	228	142	1195	306	874	2037	2266	559	36	542	304	305	197	555	1356	312	354	1297	2539	1218	588	1272	599	4947	3392	261	1945	176	300	610	177	2038	374	437	505	103	139	123	178	58	118	464	2074	416	842	50
LOC143666	0	0	0	2	0	4	0	0	5	14	4	0	8	1	0	0	4	4	2	0	4	5	14	0	0	8	8	0	9	2	0	4	4	12	7	8	0	0	0	2	4	0	2	0	2	10	6	4	0
MIR210	0	0	0	0	0	0	0	1	2	0	0	0	0	0	0	0	0	0	0	0	0	0	0	0	0	6	3	3	0	6	0	0	0	0	6	0	0	0	0	0	0	0	0	0	0	6	0	0	0
MIR210HG	0	0	6	2	0	22	0	18	34	107	5	0	0	16	0	8	2	23	2	14	18	18	8	24	5	0	335	31	11	179	1	0	20	0	35	31	7	28	2	4	0	7	0	0	0	86	2	24	0
RASSF7	46	42	29	24	24	248	45	140	585	593	187	4	48	52	58	68	106	548	22	107	89	168	151	165	153	102	2006	976	63	914	48	103	164	14	609	134	86	121	27	34	10	67	24	31	43	823	44	176	28
LMNTD2-AS1	8	0	0	0	0	31	0	9	26	24	2	0	0	0	0	0	4	22	2	2	23	34	14	8	4	4	92	29	7	39	0	0	0	0	72	0	1	12	2	2	0	1	0	0	2	34	6	15	0
LMNTD2	25	24	12	19	2	119	26	129	178	201	62	0	29	16	36	16	42	151	20	10	109	330	112	41	285	123	831	298	44	357	0	42	71	2	335	15	46	96	4	6	2	4	8	4	42	169	92	69	0
LRRC56	31	16	15	13	8	51	38	37	51	112	17	0	28	6	16	4	4	56	14	24	115	306	98	12	67	79	186	78	5	128	14	8	4	4	984	25	16	17	8	13	6	10	2	2	20	74	31	36	3
HRAS	67	31	64	32	18	50	22	124	204	218	54	0	71	33	42	38	87	205	38	38	166	195	139	73	166	58	502	441	33	220	28	85	114	24	511	63	87	64	11	27	11	23	0	13	33	222	34	65	0
LOC101059906	14	0	2	2	0	0	0	2	17	32	0	1	4	4	0	0	4	12	6	2	50	29	9	7	3	6	22	6	6	25	0	6	0	0	535	6	0	4	0	0	0	6	0	0	8	8	6	6	0
LOC105376507	0	0	0	0	0	0	0	0	0	0	0	0	0	0	0	0	0	0	0	0	0	0	0	0	0	0	0	0	0	0	0	0	0	0	0	0	0	0	0	0	0	0	0	0	0	0	0	0	0
RNH1	209	145	350	145	124	390	128	348	950	1107	471	14	416	113	236	252	403	771	165	304	952	1709	727	499	521	282	1924	1673	210	834	251	355	447	204	785	330	430	171	139	144	79	189	61	76	187	921	280	329	26
PTDSS2	67	2	73	16	17	85	27	114	252	362	40	2	59	27	55	13	96	227	67	62	338	567	245	119	142	146	688	449	37	304	41	64	38	32	393	47	41	56	12	20	38	14	0	8	35	300	38	52	2
DLG5-AS1	14	2	0	2	0	3	0	4	7	10	4	0	2	2	2	0	4	13	0	4	28	70	12	2	1	6	20	27	12	9	2	8	8	2	42	6	6	6	0	0	0	0	0	0	0	4	0	9	0
RN7SL284P	0	0	1	2	1	0	0	0	0	9	0	0	0	2	0	0	2	7	0	0	9	23	9	1	0	0	23	7	0	18	0	0	1	0	10	0	0	2	0	0	0	0	0	0	0	7	0	1	0
LOC101929347	4	0	2	0	0	4	0	11	28	57	1	0	0	2	0	0	13	32	3	0	10	114	13	8	2	6	37	46	0	41	0	0	0	0	30	0	2	1	0	0	0	0	0	0	2	44	0	3	4
DLG5	671	300	468	180	138	1215	204	851	1506	3745	791	34	586	245	453	356	481	1616	290	602	1531	4781	1911	628	1043	471	4243	2357	504	2796	137	515	522	191	2594	276	379	508	97	171	186	201	107	136	258	1857	381	884	43
IMPDH1P5	8	0	0	0	0	11	0	10	44	121	2	0	2	8	8	0	2	55	10	14	44	135	58	12	6	10	128	87	8	115	0	2	12	1	108	0	8	8	0	5	0	0	2	0	2	81	0	12	6
RNU6-1266P	0	0	0	0	0	0	0	4	0	15	0	0	0	0	0	0	2	0	0	0	4	7	0	0	0	0	15	1	0	10	3	0	0	0	6	0	0	0	0	0	0	0	0	0	2	6	0	2	0
MARCHF8	285	194	353	225	141	387	122	382	332	796	314	12	296	189	187	225	272	540	127	409	1045	1136	595	533	368	94	1283	620	378	1511	237	544	357	235	297	391	243	210	116	124	123	136	57	186	255	541	277	328	49
LOC102724323	0	0	0	0	0	0	0	0	0	0	0	0	0	0	0	0	0	0	2	0	2	5	0	0	0	0	4	0	0	0	0	0	0	0	0	0	0	0	0	0	0	0	0	0	0	0	0	0	0
ALOX5	124	34	205	111	62	73	54	118	110	190	74	4	123	21	97	150	103	128	71	250	411	533	195	157	101	110	263	210	55	97	131	238	271	138	208	146	220	30	120	29	46	50	20	61	155	195	107	98	16
OR13A1	0	0	0	2	0	0	4	0	0	0	0	0	0	2	0	0	0	3	0	0	6	18	0	2	2	2	2	0	0	0	2	0	2	2	0	0	0	0	0	0	0	0	0	0	6	2	0	0	0
OR6D1P	0	0	0	0	0	0	0	0	0	0	0	0	0	0	0	0	0	2	0	2	2	0	0	0	0	0	0	0	0	0	0	6	0	0	0	0	0	0	0	0	0	0	0	0	2	0	0	0	0
CUBNP2	0	0	0	0	0	0	0	0	4	0	0	0	0	0	0	0	0	1	0	4	6	4	0	0	5	0	0	0	0	0	0	0	2	2	0	0	0	0	0	0	0	0	0	0	0	0	0	0	0
LOC105378283	0	0	0	1	0	0	0	0	0	0	0	0	4	0	0	6	0	0	0	2	0	0	2	0	0	0	0	0	2	0	0	0	0	1	0	0	0	0	0	0	0	0	0	0	0	0	3	0	0
RNU6-1207P	0	0	0	0	0	0	0	0	0	0	0	0	0	0	0	0	0	0	0	0	0	0	0	0	0	0	2	0	0	0	0	0	0	0	0	0	0	0	0	0	0	0	0	0	0	0	0	0	0
LOC101929816	0	0	0	0	0	0	0	0	0	0	0	0	0	0	0	0	0	0	0	0	0	0	0	0	0	0	0	0	0	0	0	0	0	0	0	0	0	0	0	0	0	0	0	0	0	0	0	0	0
PABPC1P8	0	0	0	0	0	0	0	0	0	1	0	0	0	0	0	0	0	0	0	4	0	2	0	0	0	0	0	0	0	4	0	0	0	0	2	0	0	0	0	0	0	0	0	0	0	0	0	0	0
LOC101929373	0	0	0	0	0	0	0	0	0	0	0	0	0	0	0	0	3	0	0	0	0	0	0	0	0	0	0	0	0	0	0	0	0	0	0	6	2	0	0	0	0	0	0	0	0	0	2	0	0
LOC105378267	0	0	0	0	0	0	0	8	2	0	2	0	0	0	0	0	2	2	0	0	0	0	0	0	2	0	2	2	5	2	0	0	0	0	0	0	5	0	2	0	0	0	0	0	0	0	0	0	0
LOC107984164	0	0	0	0	0	0	0	0	2	0	0	0	0	0	0	0	0	0	0	3	0	0	0	0	0	0	0	0	0	2	0	0	0	0	0	8	0	0	0	0	0	0	0	0	0	0	0	0	0
KSR1P1	0	0	0	0	0	0	0	0	0	0	2	0	0	0	0	0	0	0	0	0	0	0	0	0	2	0	0	0	5	0	0	0	0	0	0	0	0	0	0	2	0	0	0	0	0	0	0	0	0
PTCHD3	2	7	6	2	0	0	2	2	0	0	2	0	0	0	0	0	4	0	0	0	0	0	4	0	0	0	1	0	0	0	0	0	0	2	4	8	2	0	0	0	0	0	0	0	0	0	0	0	0
TRIAP1P1	0	2	0	0	0	0	0	0	0	0	2	0	0	0	0	0	0	0	0	0	2	0	2	0	0	2	0	0	0	2	0	0	0	0	2	4	0	0	0	0	0	0	0	0	0	0	2	0	0
FAM210CP	0	0	0	0	0	0	0	0	0	0	0	0	0	0	0	0	0	0	0	0	0	0	0	0	0	0	0	0	2	0	1	0	0	0	0	0	1	0	0	0	0	0	0	0	0	0	0	0	0
LINC02673	0	0	0	0	0	0	0	0	0	0	0	0	2	0	0	0	0	0	0	1	2	0	0	0	0	4	0	0	0	5	0	0	0	2	6	0	0	0	0	0	0	4	0	0	0	2	0	0	0
RNU6-452P	0	0	0	0	0	0	0	0	0	0	0	0	6	0	0	0	0	0	0	0	0	0	0	0	0	0	0	0	0	0	0	0	0	0	0	0	0	0	0	0	0	0	0	0	0	0	0	0	0
RNU6-666P	0	0	0	0	0	0	0	0	0	0	0	0	0	0	0	0	0	0	0	0	0	0	0	0	0	0	0	0	0	2	0	0	0	1	0	0	0	0	0	0	0	0	0	0	0	0	0	0	0
LOC102724245	0	0	0	0	0	6	8	2	2	13	5	0	2	2	0	0	0	12	0	2	23	6	11	0	3	0	7	0	4	39	0	2	5	0	9	8	0	0	0	0	0	0	0	0	0	14	0	2	0
ODAD2P1	8	12	0	0	4	4	0	2	0	6	0	0	0	0	0	0	0	0	0	6	6	6	6	2	0	22	3	1	2	14	0	0	6	0	11	0	0	0	0	0	4	4	0	0	0	10	6	0	2
FYTTD1P1	0	0	0	0	0	0	0	4	0	2	0	0	0	0	4	0	2	0	0	0	2	0	2	0	0	0	2	8	0	0	0	0	0	0	204	0	0	0	0	0	0	0	0	0	0	0	0	0	0
BAAT	2	2	4	0	0	0	8	0	14	2	6	0	9	1	2	0	4	0	0	0	4	3	0	0	0	0	2	10	6	15	0	4	2	0	1182	2	2	0	0	0	0	0	0	0	6	8	0	0	0
LOC100421197	0	0	0	0	0	0	0	0	0	0	0	0	0	0	0	0	0	0	0	0	0	0	2	0	2	0	2	0	0	1	0	0	0	0	35	0	0	0	0	0	0	0	0	0	0	0	0	0	0
ACNATP	0	0	0	1	0	0	4	4	0	2	6	0	0	0	0	0	0	0	0	0	0	0	0	0	9	0	2	2	0	4	0	2	0	1	27	0	0	0	0	0	0	0	0	0	0	2	4	0	0
LOC105376182	2	0	0	0	0	0	0	0	0	0	3	0	0	0	2	2	0	0	0	16	0	2	4	0	3	4	4	12	0	2	0	2	0	2	33	0	0	2	0	0	0	0	0	0	2	14	2	4	0
LOC105376183	0	0	0	0	0	0	0	1	2	0	0	0	0	0	0	0	0	0	0	0	2	0	0	0	16	0	2	2	0	0	0	0	0	0	16	0	0	0	0	0	0	0	0	0	0	4	0	0	0
TRPC6P4	0	0	0	0	0	0	0	0	0	0	0	0	6	0	0	0	0	0	0	6	10	4	2	0	2	9	0	0	0	0	0	0	2	0	2	0	0	0	0	0	0	0	0	0	0	0	0	0	0
PLPPR1	4	0	0	0	0	4	2	1	0	2	0	0	0	0	0	0	0	0	0	2	5	2	6	0	0	0	0	0	3	0	2	13	2	0	8	0	0	0	0	0	0	0	0	0	0	1	2	0	7
GAPDHP26	0	2	0	0	0	0	0	0	0	0	0	0	0	0	0	0	2	0	0	0	0	0	2	0	0	0	0	0	0	0	0	0	0	0	0	0	0	0	0	0	0	0	0	0	0	0	5	0	0
LOC100129340	4	0	0	0	0	0	1	0	0	0	0	0	0	0	2	4	0	2	1	0	0	4	0	0	2	5	0	0	0	0	0	0	2	0	0	0	0	0	0	0	0	0	0	0	2	0	0	0	0
LOC389768	5	1	0	2	6	0	2	5	7	6	1	0	12	1	7	0	6	8	0	4	6	7	9	5	11	0	9	10	6	3	0	2	13	1	1	15	10	4	0	0	0	4	8	2	1	9	0	12	1
RNU2-5P	0	0	0	0	0	0	0	0	4	2	0	0	0	0	0	0	2	0	0	0	6	9	3	0	0	0	6	8	0	14	0	0	0	0	0	0	0	0	0	0	0	0	0	0	0	8	0	0	0
MAMDC2-AS1	0	10	2	0	2	0	0	16	18	37	0	0	0	0	0	0	6	2	6	0	22	105	18	3	6	8	31	42	0	40	0	0	4	0	5	0	0	0	0	0	0	0	0	0	1	4	0	0	0
LOC105379611	0	0	0	0	0	0	0	0	0	0	0	0	0	0	0	0	0	0	0	0	0	0	0	0	0	0	0	0	0	0	0	0	0	0	0	0	0	0	0	0	0	0	0	0	0	0	0	0	0
MAMDC2	97	61	125	51	32	55	53	170	254	533	28	16	47	34	100	65	31	46	125	168	600	1903	344	215	180	102	198	487	346	352	27	250	63	13	73	109	14	41	28	110	34	62	8	92	56	68	134	50	21
APBA1	99	66	173	76	36	67	59	110	157	386	95	4	208	39	143	133	28	45	56	216	430	1045	387	123	303	200	145	211	61	223	45	173	133	78	222	119	68	34	16	33	74	55	18	32	83	24	105	50	10
LOC101929802	0	0	0	0	0	0	0	0	0	0	0	0	0	0	0	0	0	0	0	0	0	0	0	0	0	0	0	0	0	0	0	0	0	0	0	0	0	0	0	0	0	0	0	0	0	0	0	0	0
RPL4P5	58	65	93	46	11	88	15	26	92	88	89	2	73	23	52	76	118	91	24	116	156	94	143	44	91	26	83	139	79	61	53	122	105	52	151	88	94	30	17	11	23	18	7	51	73	114	46	67	12
LOC107987408	0	0	0	0	0	0	0	0	0	0	0	0	0	0	0	0	0	0	0	0	0	0	0	0	0	0	0	0	0	0	0	0	0	0	0	0	0	0	0	0	0	0	0	0	0	0	0	0	0
LOC107986986	20	14	0	0	2	16	11	20	23	92	4	0	43	8	0	0	22	30	14	2	238	332	194	7	12	10	71	44	2	79	0	0	2	8	43	0	0	2	0	0	0	19	2	2	48	34	7	6	0
ZNF251	117	56	42	40	16	62	51	68	164	394	49	0	60	25	30	29	95	194	82	110	587	1221	595	105	74	76	444	278	38	349	23	68	69	8	328	7	15	41	4	6	20	66	0	28	76	215	34	39	8
LOC100996662	4	17	18	6	0	0	7	22	6	17	12	2	19	0	15	10	4	2	2	31	54	50	32	10	38	9	8	2	29	13	2	14	8	6	3	10	0	4	2	2	7	0	4	10	2	3	35	5	0
PUF60	353	148	261	108	94	297	122	403	666	921	381	30	339	100	244	143	502	636	111	268	622	1045	514	349	352	239	1386	1183	229	864	153	304	405	92	763	314	406	165	120	84	80	178	40	104	175	868	203	275	44
MIR937	0	0	0	0	0	0	0	0	0	0	0	0	0	0	0	0	0	0	0	0	0	0	0	0	0	0	0	0	0	0	0	0	0	0	0	0	0	0	0	0	0	0	0	0	0	0	0	0	0
SCRIB	525	312	304	133	90	995	253	764	1787	2350	820	44	705	215	309	224	589	2165	189	349	938	2178	1210	485	1165	812	4896	3020	305	2661	161	358	608	136	1913	447	772	426	75	156	133	250	41	109	363	1722	499	904	46
LOC105375800	0	0	0	0	0	4	0	0	6	12	6	0	0	0	0	0	1	19	0	0	0	2	0	4	6	0	28	14	0	18	0	0	0	0	4	6	0	2	0	0	0	2	0	0	0	6	10	4	0
IQANK1	78	11	19	12	6	64	10	38	185	258	43	3	51	9	14	6	146	350	6	65	16	34	31	31	69	20	297	381	15	472	4	30	52	15	154	58	75	33	3	24	0	25	8	4	6	409	31	55	4
MIR4664	0	0	0	0	0	2	0	0	46	41	4	0	0	0	0	10	6	46	0	0	2	8	0	0	0	0	121	71	0	17	0	12	1	0	33	4	4	0	0	0	1	2	0	0	6	30	0	3	0
FAM83H	852	144	202	110	78	758	110	896	4756	3541	1058	26	726	243	295	211	1114	6196	63	243	192	557	452	548	563	350	11397	8807	379	4554	110	454	622	180	3226	859	855	394	69	134	126	231	31	114	122	4326	237	787	32
MAPK15	100	2	8	0	1	26	16	11	181	141	8	0	5	16	10	0	26	122	0	7	34	242	56	6	17	17	240	278	16	170	0	4	16	2	298	8	21	6	0	4	1	2	0	0	6	411	6	17	0
LOC101928160	0	0	0	1	0	0	0	0	0	4	0	0	0	2	2	0	1	0	0	0	2	8	0	0	0	0	0	0	0	0	0	2	0	0	2	0	0	0	0	0	0	0	0	0	0	1	2	0	2
CCDC166	6	0	0	0	0	0	0	2	0	0	2	0	0	0	0	0	0	0	0	0	0	0	2	0	0	0	0	0	0	0	0	0	0	0	0	12	2	0	0	0	0	0	0	0	0	0	0	0	0
LINC02878	9	0	2	0	0	0	6	4	0	3	0	0	4	0	6	0	7	2	0	0	16	20	6	6	3	2	10	0	8	4	0	0	0	0	6	0	4	0	0	0	0	0	0	0	2	0	0	1	0
ZNF707	134	71	56	18	17	84	50	147	183	243	56	6	99	30	72	38	37	139	30	65	208	264	219	62	177	109	300	308	52	385	35	81	118	26	177	89	38	58	11	34	5	36	30	14	39	214	90	32	8
LOC105375799	6	0	0	4	1	0	0	0	0	0	0	0	0	0	0	6	0	0	0	0	0	2	2	0	6	0	6	2	2	8	0	0	0	0	4	0	0	0	0	0	0	0	0	2	0	2	0	0	0
ZNF623	182	100	178	54	40	185	70	163	338	612	147	10	195	40	136	50	138	250	85	279	455	554	425	221	220	95	638	719	162	546	64	290	206	118	565	241	106	89	39	58	40	56	30	82	133	328	160	142	22
GFUS	435	323	356	227	108	625	90	598	1147	1443	648	25	608	123	505	292	851	1953	129	418	355	504	503	398	388	282	2967	2078	556	2354	208	358	538	171	1881	1152	708	297	85	122	146	237	161	131	287	1391	350	461	113
PYCR3	32	2	20	22	4	0	6	19	84	95	38	0	25	12	38	4	42	77	18	16	145	104	99	34	35	44	124	99	17	92	12	29	46	26	154	34	59	18	8	4	0	9	4	10	12	120	27	25	2
TIGD5	40	36	42	15	22	16	46	37	131	173	75	6	54	32	30	30	54	172	18	19	315	307	179	76	109	58	319	237	25	179	21	46	79	24	223	34	58	17	6	3	12	17	4	16	49	100	42	33	0
EEF1D	1904	1050	1719	1008	445	1453	902	2263	3198	3438	1696	83	2410	473	1809	1304	1558	3089	970	3560	4079	4543	3635	1853	2367	949	4746	4772	1853	2418	1160	2354	2777	1340	3669	2166	1824	770	621	574	689	807	367	574	1392	2716	1723	1349	363
NAPRT	324	106	231	74	55	653	52	610	1653	1437	709	8	456	167	235	198	358	2976	49	230	318	411	288	502	340	210	5378	3007	282	2783	133	180	260	108	2136	537	478	512	68	108	82	222	76	56	88	1667	119	471	36
MROH6	126	18	18	8	8	167	16	149	811	748	127	4	77	107	34	15	90	2620	10	97	56	257	63	56	92	98	2567	1384	42	1489	16	16	172	13	2281	52	128	268	8	20	2	16	22	8	46	609	31	207	10
LOC100310756	21	60	48	27	12	124	18	68	67	128	87	1	121	18	76	12	55	109	11	68	60	51	74	51	48	46	154	91	103	116	26	88	67	46	121	81	42	40	10	12	14	48	6	12	34	44	57	66	28
GSDMD	254	77	168	75	32	370	70	294	567	853	275	6	243	79	103	127	201	765	110	137	488	1025	552	422	294	218	1751	867	132	1426	125	197	297	100	519	293	284	191	87	83	40	140	36	35	99	504	100	215	30
RN7SKP175	0	0	0	0	0	0	0	0	0	0	0	0	0	0	0	0	0	0	0	0	0	0	0	0	0	0	0	0	0	0	0	0	0	0	0	0	0	0	0	0	0	0	0	0	0	0	0	0	0
ZC3H3	287	64	115	66	13	200	111	212	528	639	189	5	151	48	90	86	187	467	80	82	337	769	414	201	296	169	1874	1099	82	1003	44	115	179	55	578	150	117	145	50	49	29	65	20	45	96	501	162	235	12
LY6H	10	0	1	8	0	0	0	0	8	5	5	0	15	0	18	0	6	12	6	0	1	23	24	0	4	20	4	6	1	0	0	15	0	2	14	0	6	0	2	2	0	2	0	0	0	4	4	2	2
LY6L	0	0	0	0	0	0	0	8	0	0	0	0	0	0	0	0	2	6	0	0	2	0	0	0	0	4	0	0	4	0	0	0	0	2	0	0	0	0	0	0	0	0	0	0	0	0	4	0	0
LOC107984154	0	0	0	0	0	0	0	0	0	0	0	0	0	0	0	0	0	0	0	0	0	0	0	0	0	0	0	0	0	0	0	0	0	0	0	0	0	0	0	0	0	0	0	0	0	0	0	0	0
LOC102725000	0	0	0	0	0	0	0	0	0	0	0	0	0	0	0	0	0	0	0	0	0	0	0	0	0	0	0	0	0	0	0	0	0	0	0	0	0	0	0	0	0	0	0	0	0	0	0	0	0
LOC105379589	0	0	0	0	0	0	0	0	0	0	0	0	0	0	0	0	0	0	0	0	0	0	0	0	0	0	0	0	0	0	0	0	0	0	0	0	0	0	0	0	0	0	0	0	0	0	0	0	0
LOC105375795	0	0	0	0	0	0	0	0	0	4	0	0	0	0	0	0	0	0	0	0	9	2	0	0	0	0	0	0	0	4	0	0	0	0	0	0	0	0	0	0	0	0	0	0	0	1	0	1	0
LINC02904	8	2	6	1	0	0	0	4	2	20	1	0	14	0	2	0	16	6	0	5	17	71	43	4	2	0	16	21	1	10	0	3	1	0	14	8	0	2	0	3	0	6	0	0	3	1	12	0	0
LY6E	202	137	126	119	38	52	54	293	167	479	73	8	259	36	225	88	576	383	66	422	553	793	445	91	237	98	248	152	272	232	166	206	520	191	838	150	163	55	62	47	26	112	43	46	102	50	121	36	77
LY6E-DT	0	4	0	0	0	0	10	0	0	3	0	0	2	2	0	0	12	2	2	0	2	4	0	5	4	0	2	0	0	0	2	0	0	0	5	0	0	0	0	0	0	4	0	0	0	0	0	4	0
MIR1302-7	0	0	0	0	0	0	0	0	0	0	0	0	6	0	0	0	0	0	0	0	0	0	0	0	0	0	2	0	0	0	0	0	0	0	0	0	0	0	0	0	0	0	0	0	0	0	0	0	0
HNRNPA1P38	0	0	0	0	0	0	0	0	0	0	0	0	0	0	0	1	2	0	0	0	0	0	0	0	2	1	0	0	0	0	0	0	0	0	0	0	0	0	0	0	0	0	0	0	0	0	0	0	0
FP248	0	0	0	0	0	0	0	0	0	0	0	0	0	0	0	0	0	0	0	0	0	0	0	0	0	0	0	0	0	0	0	0	0	0	0	0	0	0	0	0	0	0	0	0	0	0	0	0	0
MROH5	17	0	3	1	0	0	8	2	14	3	5	0	12	0	0	9	27	6	2	0	31	84	83	0	2	0	8	17	3	2	0	15	13	0	9	2	1	2	0	0	0	5	0	0	3	2	2	0	2
PTP4A3	146	24	92	40	34	26	18	47	173	254	38	0	90	12	84	28	318	159	106	77	643	829	1479	94	55	70	140	236	42	88	56	62	212	153	452	44	180	21	20	8	16	47	24	6	64	48	68	29	2
LOC105375790	4	0	0	4	2	10	2	2	0	11	0	0	0	0	0	2	0	4	0	6	0	2	2	4	0	0	1	0	3	0	0	0	2	0	16	0	0	0	0	0	0	0	0	0	2	7	0	0	0
LOC101928037	8	0	0	0	0	0	2	0	1	0	0	0	0	0	0	0	0	0	0	0	0	4	4	0	0	0	2	0	0	5	0	6	2	0	14	0	2	0	0	0	0	0	0	0	0	2	0	2	0
GPR20	10	0	0	0	4	6	2	10	8	64	8	0	25	0	0	5	20	0	17	4	149	394	153	22	10	34	49	75	6	80	0	4	2	0	16	0	2	8	0	4	0	6	0	0	12	0	12	4	0
LINC01300	2	0	0	0	0	0	0	0	0	7	4	0	2	0	0	0	0	0	3	0	0	67	4	0	2	4	6	0	0	0	2	0	0	0	0	2	0	0	0	0	2	0	0	0	0	2	0	0	0
LINC00824	0	0	0	0	0	0	5	4	5	2	8	0	2	2	10	0	2	0	0	0	2	0	2	0	0	8	0	0	0	0	0	0	0	0	0	0	2	0	0	0	0	2	0	0	0	0	0	0	0
RNU6-596P	0	0	0	0	0	0	0	0	0	0	0	0	0	0	0	0	0	0	0	0	0	0	0	0	0	0	0	0	0	0	0	0	0	0	0	0	0	0	0	0	0	0	0	0	0	0	0	0	0
LINC00588	0	0	0	0	0	0	0	0	0	0	2	0	0	0	0	0	0	0	0	0	0	0	6	0	14	0	2	0	0	0	0	0	0	0	0	0	2	0	0	0	0	0	0	0	0	0	2	0	0
LOC286177	2	0	0	1	0	2	4	4	0	0	4	0	0	0	0	3	0	0	0	4	6	8	0	0	4	0	0	2	0	0	0	0	0	0	0	0	0	0	0	0	0	0	0	0	0	0	0	0	0
LINC01606	6	2	0	2	2	9	2	1	4	0	4	0	0	0	0	0	0	0	0	0	2	0	0	0	0	5	4	6	2	0	0	0	2	0	0	0	0	0	0	0	0	0	0	0	2	0	2	0	0
ADAM2	1	2	0	0	0	0	0	3	0	0	0	0	0	0	0	0	4	0	0	0	0	0	0	0	1	4	0	0	0	0	0	0	0	0	2	0	0	0	0	0	0	2	0	0	0	0	0	0	3
ADAM18	0	0	8	2	0	0	0	0	0	0	0	0	0	0	3	0	2	2	0	2	8	0	1	0	0	2	0	0	2	0	0	0	0	0	0	0	0	0	0	0	0	0	0	0	0	0	6	0	0
LOC100130964	0	0	0	0	0	0	0	0	0	0	0	0	0	0	0	0	0	0	0	0	0	0	0	0	0	2	0	0	0	0	0	0	2	0	0	0	0	0	0	0	0	0	0	0	0	0	0	0	0
ADAM5	0	0	0	0	0	0	0	4	1	0	0	0	0	0	0	4	0	2	0	1	0	0	0	0	0	0	0	0	7	0	0	0	1	0	0	5	0	0	0	0	0	0	0	0	0	0	0	1	0
LOC100420403	0	0	0	0	0	0	0	4	0	0	0	0	0	0	0	0	0	0	0	0	0	0	0	0	0	0	0	0	0	0	0	0	0	0	0	0	0	0	0	0	0	0	0	0	0	0	0	0	0
RPL3P10	5	0	0	0	0	0	0	4	6	2	0	0	2	0	0	1	1	6	0	3	6	2	6	1	0	1	9	2	0	2	1	2	0	0	0	1	0	1	0	0	1	0	0	1	0	2	0	1	0
ADAM32	20	12	51	6	15	10	12	26	24	52	30	0	32	17	22	15	6	18	6	12	43	51	22	14	40	9	36	70	32	38	0	37	23	5	12	14	9	16	2	6	9	4	6	4	1	24	42	7	0
ADAM9	372	157	285	214	77	1028	116	581	2418	3519	194	6	315	234	495	326	575	3544	134	714	1030	1136	610	516	256	83	5468	4651	898	5784	263	362	596	247	1237	561	317	406	95	110	116	260	224	276	209	4709	177	562	223
LOC107986910	2	12	0	0	0	0	0	10	4	8	4	2	0	0	12	4	0	0	2	0	4	2	14	0	15	6	10	15	0	57	0	0	2	2	6	0	0	6	0	0	0	0	0	0	2	12	2	0	1
OR7E157P	0	0	0	0	0	0	0	0	0	0	0	0	0	0	8	0	0	0	0	0	2	0	0	0	0	0	0	0	0	0	0	0	0	0	0	0	0	0	0	0	0	0	0	0	0	0	0	0	0
FAM90A23	2	2	0	0	0	0	0	0	0	0	2	0	0	0	0	0	0	0	0	0	0	0	4	0	0	0	0	0	4	0	0	0	0	8	0	0	0	0	0	0	0	0	0	0	0	0	0	8	0
FAM90A22	0	0	0	0	0	0	0	0	0	0	0	0	0	0	1	0	0	0	0	0	0	0	0	0	0	0	0	0	0	0	0	0	1	0	0	0	0	0	0	0	0	0	0	0	0	0	0	0	0
FAM90A21P	0	0	0	0	0	0	0	0	0	0	0	0	0	0	0	0	0	0	0	0	3	0	0	0	0	0	0	0	0	0	0	0	0	2	0	0	0	0	0	0	0	0	0	0	0	0	0	0	0
LOC105377800	0	1	0	0	0	0	0	0	0	0	0	0	0	0	0	0	0	0	0	1	0	6	0	0	0	0	0	0	0	0	0	0	0	0	0	0	0	0	0	0	0	0	0	0	0	0	0	0	0
FAM90A7	0	0	0	0	0	0	0	0	0	0	0	0	0	0	0	0	0	0	0	0	0	0	0	0	0	0	0	0	0	0	0	0	0	0	0	0	0	0	0	0	0	0	0	0	0	0	0	0	0
FAM90A6P	0	0	0	0	0	0	0	0	0	0	0	0	0	0	0	0	0	0	0	0	0	0	0	0	0	0	0	0	0	0	0	0	0	0	0	0	0	0	0	0	0	0	0	0	0	0	0	0	0
PRR23D1	0	0	0	0	0	0	0	0	0	0	0	0	2	0	0	0	0	0	0	0	0	0	0	0	0	0	0	0	0	0	0	0	1	0	0	0	0	0	0	0	0	0	0	0	0	0	0	0	0
LOC101927997	1	0	0	0	0	0	0	0	0	0	0	0	0	0	0	2	0	0	0	0	0	0	0	0	0	0	0	0	0	0	0	0	0	0	0	0	0	0	0	0	0	0	0	0	0	0	0	0	0
LOC105377801	0	0	0	0	0	0	0	0	0	0	0	0	0	0	0	0	0	0	0	0	0	0	0	0	0	0	0	0	0	0	0	0	0	0	0	0	0	0	0	0	0	0	0	0	0	0	0	0	0
DEFB107B	0	0	0	0	0	0	0	1	0	0	0	0	0	0	0	0	0	0	0	0	0	0	0	0	0	0	0	0	0	0	0	0	0	0	0	0	0	0	0	0	0	0	0	0	0	0	0	0	0
DEFB105B	0	0	0	0	0	0	0	0	0	0	0	0	0	0	2	0	0	0	0	0	0	0	0	0	0	0	0	0	0	0	0	0	0	0	0	0	0	0	0	0	0	0	0	0	0	0	0	0	0
DEFB106B	0	0	0	0	0	0	0	0	0	0	0	0	0	0	0	0	0	0	0	0	0	0	0	0	0	0	0	0	0	0	0	0	0	0	0	0	0	0	0	0	0	0	0	0	0	0	0	0	0
DEFB104B	0	0	0	0	0	0	0	0	0	0	0	0	0	0	0	0	0	0	0	0	0	0	0	0	0	0	0	0	0	0	0	0	0	0	0	0	0	0	0	0	0	0	0	0	0	0	0	0	0
SPAG11B	0	0	0	0	0	0	0	0	0	0	0	0	0	0	0	0	0	0	0	0	0	0	0	0	0	0	0	0	0	0	0	0	0	0	0	0	0	0	0	0	0	0	0	0	0	0	0	0	0
DEFB103B	0	0	0	0	0	0	0	0	0	0	0	0	0	0	0	0	0	0	0	0	0	0	0	0	0	0	0	0	0	0	0	0	0	0	0	0	0	0	0	0	0	0	0	0	0	0	0	0	0
HSPD1P3	0	4	0	0	0	0	0	0	1	0	0	0	0	2	0	0	2	0	0	0	6	0	6	0	4	0	0	0	4	0	0	0	0	0	0	2	0	0	0	0	0	0	0	0	2	0	0	0	0
DEFB4B	0	0	0	4	0	0	0	0	0	0	0	0	0	0	0	4	0	4	0	0	0	0	0	0	0	0	0	0	0	0	0	0	0	0	2	8	4	0	0	0	0	0	4	0	2	0	0	0	0
DEFB108C	0	0	0	0	0	0	0	0	0	0	0	0	0	0	0	0	0	0	0	0	0	0	0	0	0	0	0	0	0	0	0	0	0	0	0	0	0	0	0	0	0	0	0	0	0	0	0	0	0
ZNF705G	0	0	0	0	0	0	8	2	0	0	0	0	0	0	0	1	0	0	0	4	3	0	0	0	0	0	0	1	0	0	0	0	0	0	0	2	0	0	0	0	0	0	0	0	0	0	0	0	0
ZNF705CP	0	0	0	0	0	0	0	0	0	0	0	0	0	0	0	2	0	0	0	0	2	0	0	0	0	0	2	0	0	0	0	6	0	0	0	12	0	0	0	0	0	0	0	0	0	0	0	0	0
FAM66D	0	0	0	2	0	2	0	3	2	19	10	0	20	1	6	4	5	0	4	0	6	2	3	4	4	4	8	13	0	12	0	0	8	4	20	0	0	0	0	0	0	0	0	0	0	0	2	1	0
LOC649352	0	0	0	0	0	0	0	0	0	5	0	0	0	0	0	0	0	0	0	0	2	6	6	0	0	0	2	0	0	0	0	0	0	0	0	0	0	0	0	0	0	0	0	0	2	0	0	0	0
DEFB109B	0	0	0	0	2	0	0	2	0	0	0	0	0	0	0	0	1	0	0	0	6	4	4	7	0	0	0	0	0	0	0	0	0	0	0	0	0	0	0	0	0	0	0	0	2	0	0	0	0
LOC105377785	17	0	14	4	18	10	12	44	15	80	17	2	46	10	18	8	12	4	24	99	122	422	115	14	69	42	65	36	18	85	3	8	14	8	12	8	0	10	4	10	24	6	0	8	9	2	61	8	2
LOC107986865	14	0	0	0	0	4	0	2	3	18	2	0	2	0	2	0	0	0	8	2	36	40	28	2	23	2	6	7	16	15	1	0	0	0	2	0	2	0	7	0	1	0	0	9	2	4	10	0	2
LOC101927815	0	4	16	10	0	0	2	9	1	27	9	0	2	2	0	0	0	4	2	61	19	73	55	1	34	6	12	8	14	10	4	16	2	6	8	0	3	3	2	0	2	0	4	0	5	0	5	2	0
LOC107987411	0	0	0	0	0	0	0	0	0	0	0	0	0	0	0	0	0	0	0	0	0	0	0	0	0	0	0	0	0	0	0	0	0	0	0	0	0	0	0	0	0	0	0	0	0	0	0	0	0
LOC105377784	0	0	0	0	0	0	0	0	0	0	0	0	0	0	0	0	0	0	0	0	0	0	0	0	0	0	0	0	0	0	0	0	0	0	0	1	0	0	0	0	0	0	0	0	0	0	0	0	0
LOC105377783	0	0	0	0	0	0	0	0	0	0	0	0	0	0	0	0	0	0	0	0	0	0	0	0	0	0	0	0	0	0	0	4	0	0	0	0	0	0	0	0	0	0	0	0	0	0	0	0	0
LOC105377782	0	6	0	0	0	0	0	18	18	2	0	0	6	2	0	0	1	2	2	0	4	0	0	0	0	0	0	12	0	0	0	0	0	0	0	4	0	0	0	0	0	0	0	0	4	0	0	3	0
LOC105377781	1	0	2	0	0	10	0	1	5	0	0	0	4	4	0	2	4	0	0	0	2	0	0	3	0	0	0	38	0	2	0	0	0	0	4	0	2	0	0	0	0	0	0	0	0	0	4	0	0
[truncated: 52,629 more rows]
[truncated: 1 more columns]
